# Supplementary material for: Heterologous Overexpression of Poplar SnRK2 Genes Enhanced Salt Stress Tolerance in Arabidopsis thaliana
Source: Front Plant Sci. 2016 May 9;7:612. doi: 10.3389/fpls.2016.00612 (PMC4860416; doi:10.3389/fpls.2016.00612)
Supplement: Table S1 — Differentially expressed genes between the wild type and PtSnRK2.7 overexpressor (FC>2, p < 0.05). [file Table1.XLSX]

## Sheet: Table S1
Table S1. Differentially expressed genes between the wild type and PtSnRK2.7 overexpressor (FC>2, p<0.05)
Probe Set ID	AGI	Gene Symbol	p (Corr)	p	Fold change	Regulation in PtSnRK2.7 line	Gene Ontology Biological Process
261026_at	AT1G01240	AT1G01240	0.332738	0.00353454	2.72385	upregulated
260914_at	AT1G02640	BXL2	0.328465	0.00318506	2.90094	upregulated	0005975 // carbohydrate metabolic process // inferred from electronic annotation///0008152 // metabolic process // inferred from electronic annotation///0046685 // response to arsenic-containing substance // inferred from reviewed computational analysis
263118_at	AT1G03090	MCCA	0.352234	0.00876636	2.02798	upregulated	0006552 // leucine catabolic process // inferred from direct assay///0008152 // metabolic process // inferred from electronic annotation///0009744 // response to sucrose stimulus // inferred from reviewed computational analysis///0009750 // response to fructose stimulus // inferred from reviewed computational analysis
262456_at	AT1G11260	STP1	0.357717	0.0153832	2.03655	upregulated	0006810 // transport // inferred from electronic annotation///0008643 // carbohydrate transport // inferred from electronic annotation///0009627 // systemic acquired resistance // inferred from reviewed computational analysis///0015749 // monosaccharide transport // inferred from mutant phenotype///0031347 // regulation of defense response // inferred from reviewed computational analysis///005508…
264774_at	AT1G22890	AT1G22890	0.394975	0.0320608	2.1083	upregulated
246633_at	AT1G29720	AT1G29720	0.407452	0.0392283	2.10245	upregulated	0006468 // protein phosphorylation // inferred from electronic annotation///0016310 // phosphorylation // inferred from electronic annotation
264246_at	AT1G60140	ATTPS10	0.357717	0.01521	2.04663	upregulated	0005992 // trehalose biosynthetic process // inferred from electronic annotation///0005992 // trehalose biosynthetic process // inferred from sequence or structural similarity///0008152 // metabolic process // inferred from electronic annotation
261395_at	AT1G79700	AT1G79700	0.357717	0.0151944	2.1082	upregulated	0006351 // transcription, DNA-dependent // inferred from electronic annotation///0006355 // regulation of transcription, DNA-dependent // inferred from sequence or structural similarity///0006357 // regulation of transcription from RNA polymerase II promoter // inferred from physical interaction///0006366 // transcription from RNA polymerase II promoter // inferred from physical interaction///000…
266072_at	AT2G18700	ATTPS11	0.357717	0.0151911	2.1799	upregulated	0005992 // trehalose biosynthetic process // inferred from electronic annotation///0008152 // metabolic process // inferred from electronic annotation
266800_at	AT2G22880	AT2G22880	0.41305	0.0416127	2.12651	upregulated	0010224 // response to UV-B // inferred from expression pattern
267493_at	AT2G30400	OFP2	0.394975	0.0320071	2.0413	upregulated	0009407 // toxin catabolic process // inferred from reviewed computational analysis///0010583 // response to cyclopentenone // inferred from reviewed computational analysis///0045892 // negative regulation of transcription, DNA-dependent // inferred from direct assay///0048513 // organ development // inferred from reviewed computational analysis
258608_at	AT3G03020	AT3G03020	0.347705	0.00537103	2.2107	upregulated
256779_at	AT3G13784	AtcwINV5	0.353102	0.00994014	2.65207	upregulated	0005975 // carbohydrate metabolic process // inferred from electronic annotation///0008152 // metabolic process // inferred from electronic annotation
252563_at	AT3G45970	ATEXLA1	0.414513	0.0431314	2.27722	upregulated	0009826 // unidimensional cell growth // non-traceable author statement///0009828 // plant-type cell wall loosening // non-traceable author statement
252415_at	AT3G47340	ASN1	0.357717	0.0153764	8.13377	upregulated	0006529 // asparagine biosynthetic process // inferred from genetic interaction///0006541 // glutamine metabolic process // inferred from electronic annotation///0008152 // metabolic process // inferred from electronic annotation///0008652 // cellular amino acid biosynthetic process // inferred from electronic annotation///0009063 // cellular amino acid catabolic process // traceable author state…
251869_at	AT3G54500	AT3G54500	0.361314	0.0179798	2.04735	upregulated
251229_at	AT3G62740	BGLU7	0.424357	0.0486949	2.49874	upregulated	0005975 // carbohydrate metabolic process // inferred from electronic annotation///0008152 // metabolic process // inferred from electronic annotation
254767_s_at	AT4G13290///AT4G13310	CYP71A19	0.270074	0.000440279	2.01047	upregulated	0055114 // oxidation-reduction process // inferred from electronic annotation
245532_at	AT4G15110	CYP97B3	0.131454	5.66299e-05	6.12293	upregulated	0016117 // carotenoid biosynthetic process // inferred from electronic annotation///0019288 // isopentenyl diphosphate biosynthetic process, mevalonate-independent pathway // inferred from reviewed computational analysis///0055114 // oxidation-reduction process // inferred from electronic annotation
245505_at	AT4G15690	AT4G15690	0.419486	0.0452299	2.80298	upregulated	0045454 // cell redox homeostasis // inferred from electronic annotation///0048653 // anther development // inferred from reviewed computational analysis
245506_at	AT4G15700	AT4G15700	0.371709	0.020634	2.1678	upregulated	0045454 // cell redox homeostasis // inferred from electronic annotation
253161_at	AT4G35770	SEN1	0.328143	0.00308979	2.79901	upregulated	0006979 // response to oxidative stress // inferred from expression pattern///0007568 // aging // inferred from expression pattern///0007568 // aging // inferred from sequence or structural similarity///0009611 // response to wounding // inferred from expression pattern///0009744 // response to sucrose stimulus // inferred from reviewed computational analysis///0009750 // response to fructose sti…
246238_at	AT4G36670	AT4G36670	0.417552	0.044584	2.27871	upregulated	0006569 // tryptophan catabolic process // inferred from reviewed computational analysis///0006810 // transport // inferred from electronic annotation///0006857 // oligopeptide transport // inferred from reviewed computational analysis///0008643 // carbohydrate transport // inferred from electronic annotation///0009684 // indoleacetic acid biosynthetic process // inferred from reviewed computatio…
251039_at	AT5G02020	AT5G02020	0.29944	0.000813027	2.33914	upregulated	0006914 // autophagy // inferred from reviewed computational analysis///0009651 // response to salt stress // inferred from mutant phenotype
250327_at	AT5G12050	AT5G12050	0.131454	2.8983e-05	2.04347	upregulated	0007623 // circadian rhythm // inferred from expression pattern
246854_at	AT5G26200	AT5G26200	0.35088	0.00692604	2.20271	upregulated	0006810 // transport // inferred from electronic annotation///0006810 // transport // inferred from sequence or structural similarity///0006839 // mitochondrial transport // inferred from sequence or structural similarity///0055085 // transmembrane transport // inferred from electronic annotation
246108_at	AT5G28630	AT5G28630	0.417091	0.044253	2.11793	upregulated
249097_at	AT5G43520	AT5G43520	0.404036	0.0351229	2.20842	upregulated	0000041 // transition metal ion transport // inferred from reviewed computational analysis///0048527 // lateral root development // inferred from reviewed computational analysis///0048589 // developmental growth // inferred from reviewed computational analysis///0048765 // root hair cell differentiation // inferred from reviewed computational analysis///0055114 // oxidation-reduction process // i…
249065_at	AT5G44260	AT5G44260	0.422131	0.0467984	2.21534	upregulated	0006355 // regulation of transcription, DNA-dependent // inferred from reviewed computational analysis
247474_at	AT5G62280	AT5G62280	0.328143	0.00290158	2.15298	upregulated
267389_at	AT2G44460	BGLU28	0.405039	0.0372219	3.69858	downregulated	0005975 // carbohydrate metabolic process // inferred from electronic annotation///0008152 // metabolic process // inferred from electronic annotation///0080167 // response to karrikin // inferred from expression pattern
266743_at	AT2G02990///AT2G16300	RNS1	0.420918	0.0455656	3.18231	downregulated	0006865 // amino acid transport // inferred from reviewed computational analysis///0006950 // response to stress // inferred from electronic annotation///0007568 // aging // inferred from expression pattern///0009611 // response to wounding // inferred from expression pattern///0009718 // anthocyanin-containing compound biosynthetic process // inferred from mutant phenotype///0009867 // jasmonic …
266578_at	AT2G23910	AT2G23910	0.316112	0.00162764	2.23135	downregulated	0009744 // response to sucrose stimulus // inferred from reviewed computational analysis///0009809 // lignin biosynthetic process // inferred from sequence or structural similarity///0009813 // flavonoid biosynthetic process // inferred from reviewed computational analysis///0010224 // response to UV-B // inferred from reviewed computational analysis///0044237 // cellular metabolic process // inf…
266357_at	AT2G32290	BAM6	0.35088	0.00682394	2.25706	downregulated	0000272 // polysaccharide catabolic process // inferred from electronic annotation///0005975 // carbohydrate metabolic process // inferred from electronic annotation///0008152 // metabolic process // inferred from electronic annotation
266132_at	AT2G45130	SPX3	0.33341	0.00394382	3.66616	downregulated	0006817 // phosphate ion transport // inferred from reviewed computational analysis///0016036 // cellular response to phosphate starvation // inferred from expression pattern///0016036 // cellular response to phosphate starvation // inferred from reviewed computational analysis///0019375 // galactolipid biosynthetic process // inferred from reviewed computational analysis///0045892 // negative re…
265837_at	AT2G14560	LURP1	0.357717	0.0147161	3.634	downregulated	0000165 // MAPK cascade // inferred from reviewed computational analysis///0006612 // protein targeting to membrane // inferred from reviewed computational analysis///0009595 // detection of biotic stimulus // inferred from reviewed computational analysis///0009697 // salicylic acid biosynthetic process // inferred from reviewed computational analysis///0009751 // response to salicylic acid stimu…
265665_at	AT2G27420	AT2G27420	0.296668	0.000691793	3.0625	downregulated	0006508 // proteolysis // inferred from electronic annotation///0006508 // proteolysis // inferred from sequence or structural similarity
265200_s_at	AT2G36790///AT2G36800	UGT73C6	0.312462	0.000969412	3.48273	downregulated	0008152 // metabolic process // inferred from electronic annotation///0016131 // brassinosteroid metabolic process // inferred from direct assay///0051555 // flavonol biosynthetic process // inferred from direct assay///0051555 // flavonol biosynthetic process // inferred from mutant phenotype
265170_at	AT1G23730	BCA3	0.390322	0.0269556	2.59311	downregulated	0015976 // carbon utilization // inferred from electronic annotation///0015976 // carbon utilization // inferred from sequence or structural similarity
265121_at	AT1G62560	FMO GS-OX3	0.35088	0.00654844	2.05491	downregulated	0009684 // indoleacetic acid biosynthetic process // inferred from reviewed computational analysis///0019344 // cysteine biosynthetic process // inferred from reviewed computational analysis///0019761 // glucosinolate biosynthetic process // inferred from mutant phenotype///0019761 // glucosinolate biosynthetic process // inferred from reviewed computational analysis///0055114 // oxidation-reduct…
265091_s_at	AT1G03495///AT1G03940	AT1G03495///AT1G03940	0.35088	0.00661629	4.00418	downregulated
265053_at	AT1G52000	AT1G52000	0.332738	0.00363361	2.14414	downregulated
264931_at	AT1G60590	AT1G60590	0.348248	0.00582184	2.66811	downregulated	0005975 // carbohydrate metabolic process // inferred from electronic annotation///0005975 // carbohydrate metabolic process // inferred from sequence or structural similarity///0008152 // metabolic process // inferred from electronic annotation///0016556 // mRNA modification // inferred from reviewed computational analysis
264898_at	AT1G23205	AT1G23205	0.13592	6.69186e-05	3.69766	downregulated	0043086 // negative regulation of catalytic activity // inferred from electronic annotation
263829_at	AT2G40435	AT2G40435	0.417091	0.0439065	2.16103	downregulated
263515_at	AT2G21640	AT2G21640	0.357717	0.0146964	3.13022	downregulated	0006979 // response to oxidative stress // inferred from direct assay
263391_at	AT2G11810	MGDC	0.316112	0.00125221	3.65311	downregulated	0005975 // carbohydrate metabolic process // inferred from electronic annotation///0006631 // fatty acid metabolic process // inferred from genetic interaction///0006631 // fatty acid metabolic process // inferred from mutant phenotype///0009247 // glycolipid biosynthetic process // inferred from electronic annotation///0016036 // cellular response to phosphate starvation // inferred from express…
263231_at	AT1G05680	UGT74E2	0.357717	0.0131972	2.13795	downregulated	0006950 // response to stress // inferred from electronic annotation///0008152 // metabolic process // inferred from electronic annotation///0009407 // toxin catabolic process // inferred from reviewed computational analysis///0010016 // shoot system morphogenesis // inferred from mutant phenotype///0010583 // response to cyclopentenone // inferred from reviewed computational analysis///0042631 /…
262482_at	AT1G17020	SRG1	0.421418	0.0459136	2.01806	downregulated	0009737 // response to abscisic acid stimulus // inferred from reviewed computational analysis///0009793 // embryo development ending in seed dormancy // inferred from reviewed computational analysis///0009813 // flavonoid biosynthetic process // inferred from sequence or structural similarity///0009830 // cell wall modification involved in abscission // inferred from reviewed computational analy…
262369_at	AT1G73010	PS2	0.332738	0.00350915	6.84808	downregulated	0008152 // metabolic process // inferred from electronic annotation///0016036 // cellular response to phosphate starvation // inferred from expression pattern///0016036 // cellular response to phosphate starvation // inferred from reviewed computational analysis///0016311 // dephosphorylation // inferred from electronic annotation///0019375 // galactolipid biosynthetic process // inferred from re…
261192_at	AT1G32870	ANAC13	0.375852	0.0230722	2.10943	downregulated	0006355 // regulation of transcription, DNA-dependent // inferred from electronic annotation///0007275 // multicellular organismal development // inferred from sequence or structural similarity///0010114 // response to red light // inferred from expression pattern///0010224 // response to UV-B // inferred from expression pattern///0016036 // cellular response to phosphate starvation // inferred f…
261177_at	AT1G04770	AT1G04770	0.357717	0.0133994	2.49555	downregulated	0009658 // chloroplast organization // inferred from mutant phenotype
260688_at	AT1G17665	AT1G17665	0.357717	0.0150106	2.43231	downregulated	0007623 // circadian rhythm // inferred from reviewed computational analysis
260547_at	AT2G43550	AT2G43550	0.328143	0.00244386	2.28184	downregulated	0006952 // defense response // inferred from electronic annotation///0031640 // killing of cells of other organism // inferred from electronic annotation///0050832 // defense response to fungus // inferred from electronic annotation
260551_at	AT2G43510	ATTI1	0.363276	0.0181761	2.59624	downregulated	0006952 // defense response // inferred from electronic annotation///0006952 // defense response // traceable author statement///0031640 // killing of cells of other organism // inferred from electronic annotation///0050832 // defense response to fungus // inferred from mutant phenotype
260522_x_at	AT2G41730	AT2G41730	0.347676	0.00529019	3.69403	downregulated	0009061 // anaerobic respiration // inferred from expression pattern///0009061 // anaerobic respiration // inferred from mutant phenotype
260408_at	AT1G69880	ATH8	0.407452	0.03969	2.62065	downregulated	0000280 // nuclear division // inferred from reviewed computational analysis///0006662 // glycerol ether metabolic process // inferred from electronic annotation///0007000 // nucleolus organization // inferred from reviewed computational analysis///0045454 // cell redox homeostasis // inferred from electronic annotation///0055114 // oxidation-reduction process // inferred from electronic annotati…
259399_at	AT1G17710	AT1G17710	0.33341	0.00418739	2.89578	downregulated	0008152 // metabolic process // inferred from electronic annotation///0016036 // cellular response to phosphate starvation // inferred from reviewed computational analysis///0016311 // dephosphorylation // inferred from electronic annotation///0019375 // galactolipid biosynthetic process // inferred from reviewed computational analysis///0045892 // negative regulation of transcription, DNA-depend…
259133_at	AT3G05400	AT3G05400	0.363598	0.0185055	2.63829	downregulated	0006810 // transport // inferred from electronic annotation///0008643 // carbohydrate transport // inferred from electronic annotation///0055085 // transmembrane transport // inferred from electronic annotation
258856_at	AT3G02040	SRG3	0.35088	0.00621313	2.98344	downregulated	0006071 // glycerol metabolic process // inferred from electronic annotation///0006071 // glycerol metabolic process // inferred from sequence or structural similarity///0006629 // lipid metabolic process // inferred from electronic annotation///0030643 // cellular phosphate ion homeostasis // inferred from mutant phenotype///0046686 // response to cadmium ion // inferred from reviewed computatio…
258321_at	AT3G22840	ELIP1	0.40587	0.0383016	2.40626	downregulated	0009409 // response to cold // inferred from expression pattern///0009411 // response to UV // inferred from reviewed computational analysis///0009718 // anthocyanin-containing compound biosynthetic process // inferred from reviewed computational analysis///0009744 // response to sucrose stimulus // inferred from reviewed computational analysis///0009813 // flavonoid biosynthetic process // infer…
258158_at	AT3G17790	PAP17	0.253408	0.000336348	3.58868	downregulated	0016036 // cellular response to phosphate starvation // inferred from reviewed computational analysis///0016311 // dephosphorylation // inferred from direct assay///0019375 // galactolipid biosynthetic process // inferred from reviewed computational analysis///0030643 // cellular phosphate ion homeostasis // inferred from expression pattern///0042542 // response to hydrogen peroxide // inferred f…
257985_at	AT3G20810	AT3G20810	0.375594	0.0220301	2.2164	downregulated	0006355 // regulation of transcription, DNA-dependent // inferred from reviewed computational analysis///0007623 // circadian rhythm // inferred from mutant phenotype///0042752 // regulation of circadian rhythm // inferred from mutant phenotype
257925_at	AT3G23170	AT3G23170	0.411772	0.0412711	2.13085	downregulated
257641_s_at	AT3G25760///AT3G25770	AOC1	0.33341	0.00408966	2.35061	downregulated	0006950 // response to stress // inferred from electronic annotation///0009269 // response to desiccation // inferred from expression pattern///0009409 // response to cold // inferred from expression pattern///0009695 // jasmonic acid biosynthetic process // traceable author statement
256927_at	AT3G22550	AT3G22550	0.357717	0.0121501	2.28396	downregulated
256940_at	AT3G30720	QQS	0.379916	0.0241057	2.68001	downregulated	0019252 // starch biosynthetic process // inferred from mutant phenotype
256603_at	AT3G28270	AT3G28270	0.35088	0.0065228	2.43412	downregulated
256596_at	AT3G28540	AT3G28540	0.357717	0.0121771	2.57233	downregulated
256060_at	AT1G07050	AT1G07050	0.29944	0.000826807	2.80242	downregulated	0007623 // circadian rhythm // inferred from reviewed computational analysis
255604_at	AT4G01080	TBL26	0.379521	0.0239916	3.69692	downregulated
254833_s_at	AT4G12280///AT4G12290	AT4G12280///AT4G12290	0.35088	0.00659436	2.44344	downregulated	0009308 // amine metabolic process // inferred from electronic annotation///0055114 // oxidation-reduction process // inferred from electronic annotation
254835_s_at	AT4G12310///AT4G12320	CYP706A5	0.253408	0.000343097	2.11515	downregulated	0055114 // oxidation-reduction process // inferred from electronic annotation
254741_s_at	AT4G13900///AT4G13920	AtRLP49	0.332738	0.00360683	2.49065	downregulated	0006952 // defense response // inferred from sequence or structural similarity///0007165 // signal transduction // inferred by curator
254283_s_at	AT4G22870///AT4G22880	LDOX	0.253408	0.000325404	4.40642	downregulated	0007033 // vacuole organization // inferred from mutant phenotype///0009611 // response to wounding // inferred from expression pattern///0009718 // anthocyanin-containing compound biosynthetic process // traceable author statement///0009753 // response to jasmonic acid stimulus // inferred from expression pattern///0009813 // flavonoid biosynthetic process // inferred from electronic annotation/…
253988_at	AT4G26310	AT4G26310	0.328465	0.00319389	3.85751	downregulated	0006414 // translational elongation // inferred from electronic annotation///0006414 // translational elongation // inferred from sequence or structural similarity///0043043 // peptide biosynthetic process // inferred from electronic annotation
252888_at	AT4G39210	APL3	0.392229	0.0281557	2.37891	downregulated	0005978 // glycogen biosynthetic process // inferred from electronic annotation///0008152 // metabolic process // inferred from electronic annotation///0009058 // biosynthetic process // inferred from electronic annotation///0009853 // photorespiration // inferred from reviewed computational analysis///0019252 // starch biosynthetic process // inferred from reviewed computational analysis///00192…
252629_at	AT3G44970	AT3G44970	0.316112	0.0013214	2.61226	downregulated	0055114 // oxidation-reduction process // inferred from electronic annotation
252618_at	AT3G45140	LOX2	0.316112	0.00171851	2.84701	downregulated	0000023 // maltose metabolic process // inferred from reviewed computational analysis///0000096 // sulfur amino acid metabolic process // inferred from reviewed computational analysis///0006546 // glycine catabolic process // inferred from reviewed computational analysis///0006629 // lipid metabolic process // inferred from electronic annotation///0006631 // fatty acid metabolic process // inferr…
252414_at	AT3G47420	PS3	0.35088	0.00824918	2.34014	downregulated	0006810 // transport // inferred from electronic annotation///0008643 // carbohydrate transport // inferred from sequence or structural similarity///0055062 // phosphate ion homeostasis // inferred from expression pattern///0055085 // transmembrane transport // inferred from electronic annotation
252269_at	AT3G49580	LSU1	0.424152	0.0483638	5.54177	downregulated
251705_at	AT3G56400	WRKY70	0.322348	0.00186314	2.51923	downregulated	0000165 // MAPK cascade // inferred from reviewed computational analysis///0001666 // response to hypoxia // inferred from reviewed computational analysis///0002679 // respiratory burst involved in defense response // inferred from reviewed computational analysis///0006351 // transcription, DNA-dependent // inferred from electronic annotation///0006355 // regulation of transcription, DNA-dependen…
251677_at	AT3G56980	BHLH039	0.413488	0.0421071	5.30164	downregulated	0006351 // transcription, DNA-dependent // inferred from electronic annotation///0006355 // regulation of transcription, DNA-dependent // traceable author statement///0010106 // cellular response to iron ion starvation // inferred from expression pattern///0055072 // iron ion homeostasis // inferred from genetic interaction
251143_at	AT5G01220	SQD2	0.322348	0.00194237	2.08879	downregulated	0006636 // unsaturated fatty acid biosynthetic process // inferred from reviewed computational analysis///0009058 // biosynthetic process // inferred from electronic annotation///0009247 // glycolipid biosynthetic process // inferred from direct assay///0015995 // chlorophyll biosynthetic process // inferred from reviewed computational analysis///0016036 // cellular response to phosphate starvati…
250515_at	AT5G09570	AT5G09570	0.270074	0.000448416	3.28811	downregulated	0016036 // cellular response to phosphate starvation // inferred from reviewed computational analysis///0019375 // galactolipid biosynthetic process // inferred from reviewed computational analysis///0045892 // negative regulation of transcription, DNA-dependent // inferred from reviewed computational analysis
250445_at	AT5G10760	AT5G10760	0.33341	0.00398737	2.73062	downregulated	0000165 // MAPK cascade // inferred from reviewed computational analysis///0006508 // proteolysis // inferred from electronic annotation///0006508 // proteolysis // inferred from sequence or structural similarity///0009627 // systemic acquired resistance // inferred from reviewed computational analysis///0009814 // defense response, incompatible interaction // inferred from reviewed computational…
250083_at	AT5G17220	ATGSTF12	0.328143	0.00284403	3.64007	downregulated	0006950 // response to stress // inferred from electronic annotation///0009407 // toxin catabolic process // inferred from reviewed computational analysis///0009407 // toxin catabolic process // traceable author statement///0009636 // response to toxic substance // inferred from electronic annotation///0009718 // anthocyanin-containing compound biosynthetic process // inferred from reviewed compu…
249774_at	AT5G24150	SQP1	0.361278	0.0176619	2.00736	downregulated	0008152 // metabolic process // inferred from electronic annotation///0016126 // sterol biosynthetic process // inferred from reviewed computational analysis///0016126 // sterol biosynthetic process // traceable author statement///0019745 // pentacyclic triterpenoid biosynthetic process // inferred from reviewed computational analysis///0055114 // oxidation-reduction process // inferred from elec…
249752_at	AT5G24660	LSU2	0.357717	0.0125568	4.27828	downregulated	0009658 // chloroplast organization // inferred from mutant phenotype///0031347 // regulation of defense response // inferred from mutant phenotype///0045893 // positive regulation of transcription, DNA-dependent // inferred from mutant phenotype
249493_at	AT5G39080	AT5G39080	0.332738	0.00362688	2.29513	downregulated
249215_at	AT5G42800	DFR	0.354245	0.0111591	3.17871	downregulated	0009718 // anthocyanin-containing compound biosynthetic process // inferred from mutant phenotype///0009718 // anthocyanin-containing compound biosynthetic process // inferred from reviewed computational analysis///0009718 // anthocyanin-containing compound biosynthetic process // traceable author statement///0009744 // response to sucrose stimulus // inferred from reviewed computational analysis…
249125_at	AT5G43450	AT5G43450	0.357717	0.016092	2.48937	downregulated	0055114 // oxidation-reduction process // inferred from electronic annotation
248676_at	AT5G48850	ATSDI1	0.353691	0.0109836	7.11407	downregulated	0006792 // regulation of sulfur utilization // inferred from mutant phenotype///0010438 // cellular response to sulfur starvation // inferred from expression pattern
248270_at	AT5G53450	ORG1	0.357717	0.015987	2.549	downregulated	0006468 // protein phosphorylation // inferred from electronic annotation
248185_at	AT5G54060	UF3GT	0.316112	0.00169253	4.44146	downregulated	0008152 // metabolic process // inferred from electronic annotation///0009718 // anthocyanin-containing compound biosynthetic process // inferred from mutant phenotype///0009718 // anthocyanin-containing compound biosynthetic process // inferred from reviewed computational analysis///0009744 // response to sucrose stimulus // inferred from reviewed computational analysis///0010224 // response to …
248169_at	AT5G54610	ANK	0.35088	0.00741356	3.02254	downregulated	0000165 // MAPK cascade // inferred from reviewed computational analysis///0006612 // protein targeting to membrane // inferred from reviewed computational analysis///0009697 // salicylic acid biosynthetic process // inferred from reviewed computational analysis///0009751 // response to salicylic acid stimulus // inferred from expression pattern///0009862 // systemic acquired resistance, salicyli…
247684_at	AT5G59670	AT5G59670	0.404326	0.0366729	2.60572	downregulated	0006468 // protein phosphorylation // inferred from electronic annotation///0016310 // phosphorylation // inferred from electronic annotation
247486_at	AT5G62140	AT5G62140	0.357717	0.0143178	2.00435	downregulated
247314_at	AT5G64000	SAL2	0.394975	0.0318119	2.18993	downregulated	0006790 // sulfur compound metabolic process // inferred from electronic annotation///0006790 // sulfur compound metabolic process // inferred from sequence or structural similarity///0008152 // metabolic process // inferred from electronic annotation///0009627 // systemic acquired resistance // inferred from reviewed computational analysis///0034976 // response to endoplasmic reticulum stress //…
246947_at	AT5G25120	CYP71B11	0.316112	0.00113544	2.14649	downregulated	0055114 // oxidation-reduction process // inferred from electronic annotation
246884_at	AT5G26220	AT5G26220	0.357717	0.0125041	3.1118	downregulated	0010288 // response to lead ion // inferred from expression pattern///0046686 // response to cadmium ion // inferred from expression pattern
246071_at	AT5G20150	SPX1	0.316112	0.00175088	4.82996	downregulated	0006817 // phosphate ion transport // inferred from reviewed computational analysis///0016036 // cellular response to phosphate starvation // inferred from expression pattern///0016036 // cellular response to phosphate starvation // inferred from reviewed computational analysis///0019375 // galactolipid biosynthetic process // inferred from reviewed computational analysis///0045892 // negative re…
246001_at	AT5G20790	AT5G20790	0.175646	0.000129716	5.00773	downregulated
245692_at	AT5G04150	BHLH101	0.422754	0.0471181	5.2993	downregulated	0006351 // transcription, DNA-dependent // inferred from electronic annotation///0006355 // regulation of transcription, DNA-dependent // traceable author statement///0010106 // cellular response to iron ion starvation // inferred from expression pattern///0055072 // iron ion homeostasis // inferred from genetic interaction
245671_at	AT1G28230	PUP1	0.293543	0.000584422	2.05181	downregulated	0006810 // transport // inferred from electronic annotation///0006863 // purine nucleobase transport // inferred from direct assay///0006863 // purine nucleobase transport // inferred from reviewed computational analysis///0010184 // cytokinin transport // inferred from direct assay///0015860 // purine nucleoside transmembrane transport // inferred from direct assay///0015931 // nucleobase-contai…
245624_at	AT4G14090	AT4G14090	0.33341	0.00401191	3.91075	downregulated	0008152 // metabolic process // inferred from electronic annotation///0009698 // phenylpropanoid metabolic process // inferred from electronic annotation///0009718 // anthocyanin-containing compound biosynthetic process // inferred from reviewed computational analysis///0009744 // response to sucrose stimulus // inferred from reviewed computational analysis///0010224 // response to UV-B // inferr…
245434_at	AT4G17140	AT4G17140	0.375852	0.0227506	2.0096	downregulated	0007155 // cell adhesion // inferred from reviewed computational analysis///0010090 // trichome morphogenesis // inferred from reviewed computational analysis///0045010 // actin nucleation // inferred from reviewed computational analysis///0048765 // root hair cell differentiation // inferred from reviewed computational analysis///0071555 // cell wall organization // inferred from reviewed comput…
245319_at	AT4G16146	AT4G16146	0.39432	0.0293301	2.5186	downregulated	0007623 // circadian rhythm // inferred from reviewed computational analysis
257382_at	AT2G40750	WRKY54	0.293543	0.000596154	2.8075	downregulated	0000165 // MAPK cascade // inferred from reviewed computational analysis///0006351 // transcription, DNA-dependent // inferred from electronic annotation///0006355 // regulation of transcription, DNA-dependent // inferred from electronic annotation///0006355 // regulation of transcription, DNA-dependent // inferred from sequence or structural similarity///0006612 // protein targeting to membrane …
