# Supplementary material for: Heterologous Overexpression of Poplar SnRK2 Genes Enhanced Salt Stress Tolerance in Arabidopsis thaliana
Source: Front Plant Sci. 2016 May 9;7:612. doi: 10.3389/fpls.2016.00612 (PMC4860416; doi:10.3389/fpls.2016.00612)
Supplement: Table S2 — Upregulated 337 genes in the wild type by the salt treatment (FC>3, p < 0.01). [file Table2.XLSX]

## Sheet: Table S2
Table S2. Upregulated 337 genes in the wild type by the salt treatment (FC>3, p<0.01)
Probe Set ID	AGI	Gene Symbol	Corrected p-value	p-value	Fold Change	Gene Ontology Biological Process
261585_at	AT1G01010	ANAC001	0.0714354	0.00364454	3.14454	0006351 // transcription, DNA-dependent // inferred from electronic annotation///0006355 // regulation of transcription, DNA-dependent // inferred from electronic annotation///0006888 // ER to Golgi vesicle-mediated transport // inferred from reviewed computational analysis///0007275 // multicellular organismal development // inferred from sequence or structural similarity///0043090 // amino acid…
259439_at	AT1G01480	ACS2	0.0694479	0.00315813	49.7312	0009058 // biosynthetic process // inferred from electronic annotation///0009693 // ethylene biosynthetic process // inferred from reviewed computational analysis///0009693 // ethylene biosynthetic process // traceable author statement///0009835 // fruit ripening // inferred from electronic annotation///0042218 // 1-aminocyclopropane-1-carboxylate biosynthetic process // inferred from electronic …
259428_at	AT1G01560	ATMPK11	0.0676089	0.00268814	9.51308	0000165 // MAPK cascade // inferred from reviewed computational analysis///0006355 // regulation of transcription, DNA-dependent // inferred from reviewed computational analysis///0006468 // protein phosphorylation // inferred from electronic annotation///0006612 // protein targeting to membrane // inferred from reviewed computational analysis///0007154 // cell communication // inferred from revi…
260932_s_at	AT1G02520///AT1G02530	PGP12	0.0767544	0.00512853	11.3484	0006200 // ATP catabolic process // inferred from electronic annotation///0006810 // transport // inferred from electronic annotation///0055085 // transmembrane transport // inferred from electronic annotation
262118_at	AT1G02850	BGLU11	0.0518933	0.000507851	26.154	0005975 // carbohydrate metabolic process // inferred from electronic annotation///0008152 // metabolic process // inferred from electronic annotation
262103_at	AT1G02940	GSTF5	0.0880592	0.00936386	3.73159	0009407 // toxin catabolic process // inferred from reviewed computational analysis///0009407 // toxin catabolic process // traceable author statement///0009636 // response to toxic substance // inferred from electronic annotation
263168_at	AT1G03020		0.0843259	0.00805073	4.72217	0045454 // cell redox homeostasis // inferred from electronic annotation///0048653 // anther development // inferred from reviewed computational analysis
261125_at	AT1G04990		0.0791329	0.006081	3.69656	0007623 // circadian rhythm // inferred from reviewed computational analysis///0090305 // nucleic acid phosphodiester bond hydrolysis // inferred from electronic annotation
263184_at	AT1G05560	UGT75B1	0.0791329	0.00600481	3.68273	0008152 // metabolic process // inferred from electronic annotation///0009407 // toxin catabolic process // inferred from reviewed computational analysis///0009751 // response to salicylic acid stimulus // inferred from expression pattern///0009920 // cell plate formation involved in plant-type cell wall biogenesis // traceable author statement///0010583 // response to cyclopentenone // inferred …
263182_at	AT1G05575		0.0715094	0.00374942	3.26068	0002679 // respiratory burst involved in defense response // inferred from reviewed computational analysis///0009061 // anaerobic respiration // inferred from expression pattern///0009061 // anaerobic respiration // inferred from mutant phenotype///0009723 // response to ethylene stimulus // inferred from reviewed computational analysis///0009738 // abscisic acid mediated signaling pathway // inf…
263231_at	AT1G05680	UGT74E2	0.0602289	0.00095342	44.0818	0006950 // response to stress // inferred from electronic annotation///0008152 // metabolic process // inferred from electronic annotation///0009407 // toxin catabolic process // inferred from reviewed computational analysis///0010016 // shoot system morphogenesis // inferred from mutant phenotype///0010583 // response to cyclopentenone // inferred from reviewed computational analysis///0042631 /…
260784_at	AT1G06180	ATMYB13	0.0757863	0.00478376	3.16141	0006355 // regulation of transcription, DNA-dependent // inferred from sequence or structural similarity///0009651 // response to salt stress // inferred from expression pattern///0009739 // response to gibberellin stimulus // inferred from expression pattern///0009751 // response to salicylic acid stimulus // inferred from expression pattern///0009753 // response to jasmonic acid stimulus // inf…
262635_at	AT1G06570	PDS1	0.0610978	0.00131616	3.4041	0006559 // L-phenylalanine catabolic process // inferred from electronic annotation///0006572 // tyrosine catabolic process // inferred from electronic annotation///0009072 // aromatic amino acid family metabolic process // inferred from electronic annotation///0010189 // vitamin E biosynthetic process // inferred from mutant phenotype///0010236 // plastoquinone biosynthetic process // inferred f…
262616_at	AT1G06620		0.0528449	0.000546001	8.91382	0009414 // response to water deprivation // inferred from reviewed computational analysis///0009611 // response to wounding // inferred from reviewed computational analysis///0009867 // jasmonic acid mediated signaling pathway // inferred from reviewed computational analysis///0042538 // hyperosmotic salinity response // inferred from reviewed computational analysis///0055114 // oxidation-reducti…
256050_at	AT1G07000	ATEXO70B2	0.0602289	0.00110172	4.94631	0006612 // protein targeting to membrane // inferred from reviewed computational analysis///0006887 // exocytosis // inferred from electronic annotation///0006904 // vesicle docking involved in exocytosis // inferred from sequence or structural similarity///0006944 // cellular membrane fusion // inferred from reviewed computational analysis///0006984 // ER-nucleus signaling pathway // inferred fr…
261065_at	AT1G07500		0.0670578	0.00244231	8.47343
264460_at	AT1G10170	ATNFXL1	0.0867614	0.00875427	8.06418	0006351 // transcription, DNA-dependent // inferred from electronic annotation///0006355 // regulation of transcription, DNA-dependent // inferred from electronic annotation///0006355 // regulation of transcription, DNA-dependent // inferred from sequence or structural similarity///0006914 // autophagy // inferred from reviewed computational analysis///0006952 // defense response // inferred from…
263207_at	AT1G10550	XTH33	0.0506235	0.000275218	8.40648	0005975 // carbohydrate metabolic process // inferred from electronic annotation///0006073 // cellular glucan metabolic process // inferred from electronic annotation///0008152 // metabolic process // inferred from electronic annotation///0009831 // plant-type cell wall modification involved in multidimensional cell growth // inferred from mutant phenotype
262762_at	AT1G10700	PRS3	0.0791329	0.00594389	3.04553	0006783 // heme biosynthetic process // inferred from reviewed computational analysis///0009116 // nucleoside metabolic process // inferred from electronic annotation///0009165 // nucleotide biosynthetic process // inferred from electronic annotation///0009165 // nucleotide biosynthetic process // inferred from sequence or structural similarity///0016310 // phosphorylation // inferred from electr…
262507_at	AT1G11330		0.0791329	0.00601593	4.34661	0006468 // protein phosphorylation // inferred from electronic annotation///0016310 // phosphorylation // inferred from electronic annotation///0048544 // recognition of pollen // inferred from electronic annotation
262607_at	AT1G13990		0.0676089	0.00275392	5.01236	0009646 // response to absence of light // inferred from reviewed computational analysis
262653_at	AT1G14130		0.0610978	0.00135926	3.093	0055114 // oxidation-reduction process // inferred from electronic annotation
262756_at	AT1G16370	2015-10-06	0.0712002	0.00343458	8.60221	0006810 // transport // inferred from electronic annotation///0006811 // ion transport // inferred from electronic annotation///0015706 // nitrate transport // inferred from reviewed computational analysis///0042631 // cellular response to water deprivation // inferred from expression pattern///0055085 // transmembrane transport // inferred from electronic annotation///0071472 // cellular respons…
262703_at	AT1G16510		0.0670578	0.00249032	4.64528	0009733 // response to auxin stimulus // inferred from sequence or structural similarity///0009958 // positive gravitropism // inferred from mutant phenotype///0016049 // cell growth // inferred from mutant phenotype///0060918 // auxin transport // inferred from mutant phenotype///0090057 // root radial pattern formation // inferred from mutant phenotype
261033_at	AT1G17380	JAZ5	0.0635387	0.00166728	26.646	0006351 // transcription, DNA-dependent // inferred from electronic annotation///0006355 // regulation of transcription, DNA-dependent // inferred from electronic annotation///0006952 // defense response // inferred from electronic annotation///0007165 // signal transduction // inferred from reviewed computational analysis///0009414 // response to water deprivation // inferred from reviewed compu…
261037_at	AT1G17420	LOX3	0.0623864	0.00154012	11.3896	0006629 // lipid metabolic process // inferred from electronic annotation///0006631 // fatty acid metabolic process // inferred from electronic annotation///0006633 // fatty acid biosynthetic process // inferred from electronic annotation///0006952 // defense response // traceable author statement///0009555 // pollen development // inferred from genetic interaction///0009611 // response to woundi…
259403_at	AT1G17745	PGDH	0.0791329	0.00605961	4.65475	0006564 // L-serine biosynthetic process // inferred from electronic annotation///0006564 // L-serine biosynthetic process // traceable author statement///0006569 // tryptophan catabolic process // inferred from reviewed computational analysis///0006612 // protein targeting to membrane // inferred from reviewed computational analysis///0008152 // metabolic process // inferred from electronic anno…
259400_at	AT1G17750	PEPR2	0.0745464	0.00446203	5.38842	0002237 // response to molecule of bacterial origin // inferred from reviewed computational analysis///0006468 // protein phosphorylation // inferred from electronic annotation///0006468 // protein phosphorylation // inferred from sequence or structural similarity///0006952 // defense response // inferred from electronic annotation///0007165 // signal transduction // inferred from reviewed comput…
255900_at	AT1G17830///AT3G20300		0.0606641	0.00118888	5.71311	0009409 // response to cold // RCA///0009414 // response to water deprivation // RCA///0009737 // response to abscisic acid stimulus // RCA///0042538 // hyperosmotic salinity response // RCA
256017_at	AT1G19180	JAZ1	0.0592021	0.000888375	15.7586	0000165 // MAPK cascade // inferred from reviewed computational analysis///0006351 // transcription, DNA-dependent // inferred from electronic annotation///0006355 // regulation of transcription, DNA-dependent // inferred from electronic annotation///0006612 // protein targeting to membrane // inferred from reviewed computational analysis///0006952 // defense response // inferred from electronic …
256012_at	AT1G19250	FMO1	0.06365	0.00172519	54.9157	0006952 // defense response // inferred from electronic annotation///0009626 // plant-type hypersensitive response // inferred from mutant phenotype///0009627 // systemic acquired resistance // inferred from expression pattern///0009870 // defense response signaling pathway, resistance gene-dependent // inferred from mutant phenotype///0010204 // defense response signaling pathway, resistance gen…
260666_at	AT1G19300	PARVUS	0.0654801	0.00228123	4.18523	0006569 // tryptophan catabolic process // inferred from reviewed computational analysis///0006612 // protein targeting to membrane // inferred from reviewed computational analysis///0009684 // indoleacetic acid biosynthetic process // inferred from reviewed computational analysis///0009863 // salicylic acid mediated signaling pathway // inferred from reviewed computational analysis///0009867 // …
261150_at	AT1G19640	JMT	0.0857865	0.00842966	3.73782	0006612 // protein targeting to membrane // inferred from reviewed computational analysis///0006629 // lipid metabolic process // inferred from electronic annotation///0006631 // fatty acid metabolic process // inferred from electronic annotation///0006633 // fatty acid biosynthetic process // inferred from electronic annotation///0007165 // signal transduction // inferred from reviewed computati…
255786_at	AT1G19670	ATCLH1	0.0712002	0.00347208	3.10513	0000165 // MAPK cascade // inferred from reviewed computational analysis///0006355 // regulation of transcription, DNA-dependent // inferred from reviewed computational analysis///0006612 // protein targeting to membrane // inferred from reviewed computational analysis///0009617 // response to bacterium // inferred from reviewed computational analysis///0009862 // systemic acquired resistance, sa…
255884_at	AT1G20310		0.0695906	0.00318407	6.36616	0006612 // protein targeting to membrane // inferred from reviewed computational analysis///0009693 // ethylene biosynthetic process // inferred from reviewed computational analysis///0009863 // salicylic acid mediated signaling pathway // inferred from reviewed computational analysis///0009867 // jasmonic acid mediated signaling pathway // inferred from reviewed computational analysis///0010363 …
259568_at	AT1G20490		0.0767544	0.00508288	3.41843	0008152 // metabolic process // inferred from electronic annotation///0009698 // phenylpropanoid metabolic process // inferred from sequence or structural similarity
259518_at	AT1G20510	OPCL1	0.0628646	0.00160072	6.45648	0008152 // metabolic process // inferred from electronic annotation///0009611 // response to wounding // inferred from expression pattern///0009611 // response to wounding // inferred from reviewed computational analysis///0009620 // response to fungus // inferred from reviewed computational analysis///0009695 // jasmonic acid biosynthetic process // inferred from mutant phenotype///0009695 // ja…
259561_at	AT1G21250	WAK1	0.0592021	0.00089023	7.12902	0000165 // MAPK cascade // inferred from reviewed computational analysis///0006468 // protein phosphorylation // inferred from electronic annotation///0006612 // protein targeting to membrane // inferred from reviewed computational analysis///0007166 // cell surface receptor signaling pathway // inferred from physical interaction///0009615 // response to virus // inferred from expression pattern/…
260919_at	AT1G21520///AT1G21525		0.0663211	0.00237812	10.3736	0006979 // response to oxidative stress // inferred from mutant phenotype
261934_at	AT1G22400	UGT85A1	0.0719882	0.00390095	10.4695	0006612 // protein targeting to membrane // inferred from reviewed computational analysis///0008152 // metabolic process // inferred from electronic annotation///0009863 // salicylic acid mediated signaling pathway // inferred from reviewed computational analysis///0009867 // jasmonic acid mediated signaling pathway // inferred from reviewed computational analysis///0010363 // regulation of plant…
265184_at	AT1G23710		0.0810676	0.00650565	7.24846	0002679 // respiratory burst involved in defense response // inferred from reviewed computational analysis///0009611 // response to wounding // inferred from reviewed computational analysis///0009612 // response to mechanical stimulus // inferred from reviewed computational analysis///0009873 // ethylene mediated signaling pathway // inferred from reviewed computational analysis///0010200 // resp…
265170_at	AT1G23730	BCA3	0.06715	0.00253614	6.89092	0015976 // carbon utilization // inferred from electronic annotation///0015976 // carbon utilization // inferred from sequence or structural similarity
264861_at	AT1G24320		0.0727118	0.00404641	3.37312	0008152 // metabolic process // inferred from electronic annotation///0009311 // oligosaccharide metabolic process // inferred from electronic annotation
261266_at	AT1G26770	ATEXPA10	0.068087	0.00293146	7.58248	0006949 // syncytium formation // inferred from expression pattern///0009664 // plant-type cell wall organization // inferred from electronic annotation///0009826 // unidimensional cell growth // inferred from sequence or structural similarity///0009826 // unidimensional cell growth // non-traceable author statement///0009828 // plant-type cell wall loosening // inferred from mutant phenotype///0…
261470_at	AT1G28370	ERF11	0.0824231	0.00700814	4.94168	0000165 // MAPK cascade // inferred from reviewed computational analysis///0006351 // transcription, DNA-dependent // inferred from electronic annotation///0006355 // regulation of transcription, DNA-dependent // inferred from electronic annotation///0006355 // regulation of transcription, DNA-dependent // traceable author statement///0006612 // protein targeting to membrane // inferred from revi…
261445_at	AT1G28380	NSL1	0.0776827	0.00551743	4.73279	0000165 // MAPK cascade // inferred from reviewed computational analysis///0002679 // respiratory burst involved in defense response // inferred from reviewed computational analysis///0006612 // protein targeting to membrane // inferred from reviewed computational analysis///0006820 // anion transport // inferred from reviewed computational analysis///0006862 // nucleotide transport // inferred f…
261443_at	AT1G28480	GRX480	0.0743147	0.00439234	16.7511	0000165 // MAPK cascade // inferred from reviewed computational analysis///0006355 // regulation of transcription, DNA-dependent // inferred from reviewed computational analysis///0006612 // protein targeting to membrane // inferred from reviewed computational analysis///0007154 // cell communication // inferred from reviewed computational analysis///0007165 // signal transduction // inferred fro…
260897_at	AT1G29330	ERD2	0.0860644	0.00853261	3.28444	0006621 // protein retention in ER lumen // inferred from electronic annotation///0006621 // protein retention in ER lumen // inferred from genetic interaction///0006810 // transport // inferred from electronic annotation///0006914 // autophagy // inferred from reviewed computational analysis///0009414 // response to water deprivation // inferred from reviewed computational analysis///0015031 // …
256159_at	AT1G30135	JAZ8	0.0610978	0.00136468	36.1129	0006351 // transcription, DNA-dependent // inferred from electronic annotation///0006355 // regulation of transcription, DNA-dependent // inferred from electronic annotation///0006952 // defense response // inferred from electronic annotation///0009611 // response to wounding // inferred from reviewed computational analysis///0009620 // response to fungus // inferred from reviewed computational a…
261713_at	AT1G32640	MYC2	0.0767544	0.00509441	5.39414	0006351 // transcription, DNA-dependent // inferred from electronic annotation///0006355 // regulation of transcription, DNA-dependent // inferred from electronic annotation///0006612 // protein targeting to membrane // inferred from reviewed computational analysis///0009269 // response to desiccation // inferred from expression pattern///0009611 // response to wounding // inferred from expressio…
245757_at	AT1G35140	PHI-1	0.0705781	0.00336236	7.6972	0001666 // response to hypoxia // inferred from expression pattern///0009612 // response to mechanical stimulus // inferred from reviewed computational analysis///0040007 // growth // inferred from mutant phenotype
259546_at	AT1G35350		0.0756745	0.00472922	3.47462	0006810 // transport // inferred from electronic annotation///0006817 // phosphate ion transport // inferred from reviewed computational analysis///0016036 // cellular response to phosphate starvation // inferred from reviewed computational analysis
256461_s_at	AT1G36280///AT4G18440		0.0506235	0.000125885	3.83917	0006188 // IMP biosynthetic process // inferred from electronic annotation///0009152 // purine ribonucleotide biosynthetic process // inferred from electronic annotation
259626_at	AT1G42990	ATBZIP60	0.0842822	0.00803046	6.52858	0000165 // MAPK cascade // inferred from reviewed computational analysis///0002679 // respiratory burst involved in defense response // inferred from reviewed computational analysis///0006351 // transcription, DNA-dependent // inferred from electronic annotation///0006355 // regulation of transcription, DNA-dependent // inferred from electronic annotation///0006355 // regulation of transcription,…
259507_at	AT1G43910		0.0518933	0.000496505	12.1262	0009737 // response to abscisic acid stimulus // inferred from direct assay
261327_at	AT1G44830		0.0748533	0.00460711	6.90886	0006351 // transcription, DNA-dependent // inferred from electronic annotation///0006355 // regulation of transcription, DNA-dependent // inferred from electronic annotation///0006355 // regulation of transcription, DNA-dependent // inferred from sequence or structural similarity///0009873 // ethylene mediated signaling pathway // inferred from electronic annotation///1900030 // regulation of pec…
262392_at	AT1G49520		0.0683769	0.00301286	3.12807
261658_at	AT1G50040		0.082572	0.00720733	3.30522
256178_s_at	AT1G51760///AT1G51780	ILL5	0.0791329	0.00595314	5.37184	0006508 // proteolysis // inferred from sequence or structural similarity///0008152 // metabolic process // inferred from electronic annotation///0009611 // response to wounding // inferred from expression pattern///0010112 // regulation of systemic acquired resistance // inferred from expression pattern
256181_at	AT1G51820		0.0734548	0.00416381	6.17337	0002679 // respiratory burst involved in defense response // inferred from reviewed computational analysis///0006468 // protein phosphorylation // inferred from electronic annotation///0010200 // response to chitin // inferred from reviewed computational analysis///0015824 // proline transport // inferred from reviewed computational analysis///0016310 // phosphorylation // inferred from electroni…
246368_at	AT1G51890		0.0857865	0.00843975	3.68846	0006468 // protein phosphorylation // inferred from electronic annotation///0006612 // protein targeting to membrane // inferred from reviewed computational analysis///0009863 // salicylic acid mediated signaling pathway // inferred from reviewed computational analysis///0010363 // regulation of plant-type hypersensitive response // inferred from reviewed computational analysis///0016310 // phosp…
265058_s_at	AT1G52030///AT1G52040	MBP2	0.0342292	8.72025e-06	8.66758	0006952 // defense response // traceable author statement///0007155 // cell adhesion // traceable author statement///0009611 // response to wounding // inferred from expression pattern///0009908 // flower development // traceable author statement
259609_at	AT1G52410	TSA1	0.083901	0.00793325	5.42705	0009640 // photomorphogenesis // inferred from mutant phenotype///0050832 // defense response to fungus // inferred from expression pattern
262226_at	AT1G53885///AT1G53903		0.0714354	0.00358079	12.58
263161_at	AT1G54020		0.0506235	0.000282553	19.8237	0006629 // lipid metabolic process // inferred from electronic annotation///0016042 // lipid catabolic process // inferred from electronic annotation
245840_at	AT1G58420		0.0714354	0.00365674	5.41081
262910_at	AT1G59710		0.0654994	0.00231819	3.04254
264758_at	AT1G61340		0.06365	0.00186611	6.19652	0006970 // response to osmotic stress // inferred from expression pattern///0009611 // response to wounding // inferred from expression pattern///0009617 // response to bacterium // inferred from expression pattern///0009651 // response to salt stress // inferred from expression pattern///0009693 // ethylene biosynthetic process // inferred from reviewed computational analysis///0009737 // respon…
265008_at	AT1G61560	MLO6	0.06365	0.00188853	8.65022	0006952 // defense response // inferred from sequence or structural similarity///0008219 // cell death // inferred from electronic annotation///0008219 // cell death // inferred from sequence or structural similarity///0009607 // response to biotic stimulus // inferred from electronic annotation///0009817 // defense response to fungus, incompatible interaction // inferred from mutant phenotype///…
264289_at	AT1G61890		0.0766829	0.00493154	7.20735	0006855 // drug transmembrane transport // inferred from electronic annotation///0009651 // response to salt stress // inferred from reviewed computational analysis///0009694 // jasmonic acid metabolic process // inferred from reviewed computational analysis///0009737 // response to abscisic acid stimulus // inferred from reviewed computational analysis///0009753 // response to jasmonic acid stim…
265105_s_at	AT1G62580///AT1G63340		0.0610978	0.00137018	4.73248	0055114 // oxidation-reduction process // inferred from electronic annotation///0090332 // stomatal closure // inferred from mutant phenotype
257466_at	AT1G62840		0.0791329	0.00604202	3.83549
260296_at	AT1G63750		0.0815851	0.00665363	5.06614	0006952 // defense response // inferred from electronic annotation///0006952 // defense response // inferred from sequence or structural similarity///0007165 // signal transduction // inferred from electronic annotation
261957_at	AT1G64660	ATMGL	0.0676089	0.0026843	10.7035	0006520 // cellular amino acid metabolic process // inferred from sequence or structural similarity///0006730 // one-carbon metabolic process // inferred from reviewed computational analysis///0009970 // cellular response to sulfate starvation // inferred from expression pattern///0019458 // methionine catabolic process via 2-oxobutanoate // traceable author statement///0042631 // cellular respon…
262860_at	AT1G64810	APO1	0.0676089	0.00264291	3.06892	0000373 // Group II intron splicing // inferred from mutant phenotype///0009658 // chloroplast organization // inferred from mutant phenotype///0010468 // regulation of gene expression // inferred from mutant phenotype///0015979 // photosynthesis // inferred from mutant phenotype
264635_at	AT1G65500		0.0789934	0.0058384	5.48989
260130_s_at	AT1G66270///AT1G66280	BGLU21	0.0897877	0.00999213	3.20428	0005975 // carbohydrate metabolic process // inferred from electronic annotation///0006970 // response to osmotic stress // inferred from expression pattern///0008152 // metabolic process // inferred from electronic annotation///0009651 // response to salt stress // inferred from expression pattern///0009804 // coumarin metabolic process // inferred from direct assay///0016036 // cellular respons…
256324_at	AT1G66760		0.0793828	0.00615784	7.22405	0006855 // drug transmembrane transport // inferred from electronic annotation///0009611 // response to wounding // inferred from expression pattern///0009611 // response to wounding // inferred from reviewed computational analysis///0009620 // response to fungus // inferred from reviewed computational analysis///0009695 // jasmonic acid biosynthetic process // inferred from reviewed computationa…
256366_at	AT1G66880		0.0506235	0.000172001	4.97993	0000165 // MAPK cascade // inferred from reviewed computational analysis///0006468 // protein phosphorylation // inferred from electronic annotation///0006612 // protein targeting to membrane // inferred from reviewed computational analysis///0009595 // detection of biotic stimulus // inferred from reviewed computational analysis///0009625 // response to insect // inferred from reviewed computati…
260438_at	AT1G68290	ENDO 2	0.0518933	0.000476645	3.71617	0006308 // DNA catabolic process // inferred from sequence or structural similarity///0090305 // nucleic acid phosphodiester bond hydrolysis // inferred from electronic annotation
260401_at	AT1G69840		0.0609841	0.00127938	5.21583
260405_at	AT1G69930	ATGSTU11	0.0857362	0.00839287	29.927	0006635 // fatty acid beta-oxidation // inferred from reviewed computational analysis///0006950 // response to stress // inferred from electronic annotation///0007568 // aging // inferred from reviewed computational analysis///0009407 // toxin catabolic process // inferred from reviewed computational analysis///0009407 // toxin catabolic process // traceable author statement///0009636 // response…
259850_at	AT1G72240		0.0766829	0.00492248	3.44514
259852_at	AT1G72280	AERO1	0.0739348	0.00426653	4.55173	0006457 // protein folding // inferred from electronic annotation///0006984 // ER-nucleus signaling pathway // inferred from reviewed computational analysis///0034976 // response to endoplasmic reticulum stress // inferred from reviewed computational analysis///0055114 // oxidation-reduction process // inferred from electronic annotation
260399_at	AT1G72520		0.0518933	0.00044705	19.9214	0006629 // lipid metabolic process // inferred from electronic annotation///0006631 // fatty acid metabolic process // inferred from electronic annotation///0006633 // fatty acid biosynthetic process // inferred from electronic annotation///0006952 // defense response // traceable author statement///0009555 // pollen development // inferred from genetic interaction///0009611 // response to woundi…
259911_at	AT1G72680	CAD1	0.082444	0.00705553	6.76613	0006635 // fatty acid beta-oxidation // inferred from reviewed computational analysis///0009627 // systemic acquired resistance // inferred from reviewed computational analysis///0009699 // phenylpropanoid biosynthetic process // inferred from electronic annotation///0009809 // lignin biosynthetic process // inferred from expression pattern///0009809 // lignin biosynthetic process // traceable au…
259915_at	AT1G72790		0.0580461	0.000757878	8.45465
262381_at	AT1G72900		0.0609841	0.00128564	7.79714	0006612 // protein targeting to membrane // inferred from reviewed computational analysis///0006952 // defense response // inferred from sequence or structural similarity///0007165 // signal transduction // inferred from electronic annotation///0009610 // response to symbiotic fungus // inferred from reviewed computational analysis///0009625 // response to insect // inferred from reviewed computa…
262369_at	AT1G73010	PS2	0.0506235	6.84716e-05	3.52388	0008152 // metabolic process // inferred from electronic annotation///0016036 // cellular response to phosphate starvation // inferred from expression pattern///0016036 // cellular response to phosphate starvation // inferred from reviewed computational analysis///0016311 // dephosphorylation // inferred from electronic annotation///0019375 // galactolipid biosynthetic process // inferred from re…
260046_at	AT1G73805		0.0880592	0.00941201	3.95496	0000165 // MAPK cascade // inferred from reviewed computational analysis///0001666 // response to hypoxia // inferred from reviewed computational analysis///0002237 // response to molecule of bacterial origin // inferred from reviewed computational analysis///0006355 // regulation of transcription, DNA-dependent // inferred from reviewed computational analysis///0006612 // protein targeting to me…
262177_at	AT1G74710	EDS16	0.0602289	0.0011406	5.25781	0000165 // MAPK cascade // inferred from reviewed computational analysis///0002679 // respiratory burst involved in defense response // inferred from reviewed computational analysis///0006612 // protein targeting to membrane // inferred from reviewed computational analysis///0006944 // cellular membrane fusion // inferred from reviewed computational analysis///0006952 // defense response // infer…
262213_at	AT1G74870		0.0734548	0.00415646	17.8113	0042991 // transcription factor import into nucleus // inferred from reviewed computational analysis
262211_at	AT1G74930	ORA47	0.0791329	0.0060647	7.02083	0002213 // defense response to insect // inferred from expression pattern///0006351 // transcription, DNA-dependent // inferred from electronic annotation///0006355 // regulation of transcription, DNA-dependent // inferred from electronic annotation///0006355 // regulation of transcription, DNA-dependent // inferred from sequence or structural similarity///0009611 // response to wounding // infer…
262171_at	AT1G74950	TIFY10B	0.0794704	0.00620098	5.24517	0006351 // transcription, DNA-dependent // inferred from electronic annotation///0006355 // regulation of transcription, DNA-dependent // inferred from electronic annotation///0006612 // protein targeting to membrane // inferred from reviewed computational analysis///0006952 // defense response // inferred from electronic annotation///0007165 // signal transduction // inferred from reviewed compu…
262671_at	AT1G76040	CPK29	0.0506235	6.12454e-05	3.96215	0006468 // protein phosphorylation // inferred from electronic annotation///0006468 // protein phosphorylation // inferred from sequence or structural similarity///0009627 // systemic acquired resistance // inferred from reviewed computational analysis///0009697 // salicylic acid biosynthetic process // inferred from reviewed computational analysis///0016310 // phosphorylation // inferred from el…
259979_at	AT1G76600		0.0602289	0.00109663	17.5443	0002679 // respiratory burst involved in defense response // inferred from reviewed computational analysis///0009873 // ethylene mediated signaling pathway // inferred from reviewed computational analysis///0010200 // response to chitin // inferred from reviewed computational analysis///0035556 // intracellular signal transduction // inferred from reviewed computational analysis
259878_at	AT1G76790		0.0506235	0.000318794	3.36799	0032259 // methylation // inferred from electronic annotation
259729_at	AT1G77640		0.0767544	0.00512509	4.13758	0006351 // transcription, DNA-dependent // inferred from electronic annotation///0006355 // regulation of transcription, DNA-dependent // inferred from electronic annotation///0006355 // regulation of transcription, DNA-dependent // inferred from sequence or structural similarity///0009741 // response to brassinosteroid stimulus // inferred from reviewed computational analysis///0009873 // ethyle…
261899_at	AT1G80820	CCR2	0.082572	0.00726337	7.62207	0006952 // defense response // inferred from electronic annotation///0007623 // circadian rhythm // inferred from expression pattern///0009409 // response to cold // inferred from expression pattern///0009699 // phenylpropanoid biosynthetic process // inferred from electronic annotation///0009809 // lignin biosynthetic process // non-traceable author statement///0010200 // response to chitin // i…
261892_at	AT1G80840	WRKY40	0.064506	0.00210761	9.49389	0000165 // MAPK cascade // inferred from reviewed computational analysis///0002237 // response to molecule of bacterial origin // inferred from mutant phenotype///0002679 // respiratory burst involved in defense response // inferred from reviewed computational analysis///0006351 // transcription, DNA-dependent // inferred from electronic annotation///0006355 // regulation of transcription, DNA-de…
266232_at	AT2G02310	AtPP2-B6	0.0739348	0.00432711	7.52484	0052542 // defense response by callose deposition // inferred from reviewed computational analysis
266746_s_at	AT2G02930///AT4G02520	ATGSTF3	0.0644031	0.00210015	3.97442	0006950 // response to stress // inferred from electronic annotation///0006952 // defense response // inferred from electronic annotation///0009407 // toxin catabolic process // traceable author statement///0009409 // response to cold // inferred from expression pattern///0009636 // response to toxic substance // inferred from electronic annotation///0009651 // response to salt stress // inferred…
266743_at	AT2G02990///AT2G16300	RNS1	0.0688431	0.00312186	12.0399	0006865 // amino acid transport // inferred from reviewed computational analysis///0006950 // response to stress // inferred from electronic annotation///0007568 // aging // inferred from expression pattern///0009611 // response to wounding // inferred from expression pattern///0009718 // anthocyanin-containing compound biosynthetic process // inferred from mutant phenotype///0009867 // jasmonic …
264042_at	AT2G03760	ST	0.0767544	0.00504216	17.8602	0000165 // MAPK cascade // inferred from reviewed computational analysis///0006612 // protein targeting to membrane // inferred from reviewed computational analysis///0006952 // defense response // inferred from expression pattern///0006952 // defense response // inferred from mutant phenotype///0009595 // detection of biotic stimulus // inferred from reviewed computational analysis///0009610 // …
263403_at	AT2G04040	TX1	0.0609841	0.00126376	15.1161	0006855 // drug transmembrane transport // inferred from electronic annotation///0015691 // cadmium ion transport // inferred from direct assay///0051238 // sequestering of metal ion // inferred from direct assay///0055085 // transmembrane transport // inferred from electronic annotation
263402_at	AT2G04050		0.0592021	0.000869152	19.0686	0006855 // drug transmembrane transport // inferred from electronic annotation///0042991 // transcription factor import into nucleus // inferred from reviewed computational analysis///0055085 // transmembrane transport // inferred from electronic annotation
263401_at	AT2G04070		0.0717226	0.00380115	9.4335	0006810 // transport // inferred from sequence or structural similarity///0006855 // drug transmembrane transport // inferred from electronic annotation///0055085 // transmembrane transport // inferred from electronic annotation
265530_at	AT2G06050	OPR3	0.06365	0.0019407	4.58128	0006569 // tryptophan catabolic process // inferred from reviewed computational analysis///0006629 // lipid metabolic process // inferred from electronic annotation///0006631 // fatty acid metabolic process // inferred from electronic annotation///0006633 // fatty acid biosynthetic process // inferred from electronic annotation///0007165 // signal transduction // inferred from reviewed computatio…
265479_at	AT2G15760		0.0616353	0.00142641	4.44916	0009693 // ethylene biosynthetic process // inferred from reviewed computational analysis
265414_at	AT2G16660		0.0727118	0.00405763	18.7553	0080167 // response to karrikin // inferred from expression pattern
263584_at	AT2G17040	anac036	0.06365	0.00177348	3.37929	0000165 // MAPK cascade // inferred from reviewed computational analysis///0006355 // regulation of transcription, DNA-dependent // inferred from electronic annotation///0007275 // multicellular organismal development // inferred from sequence or structural similarity///0009814 // defense response, incompatible interaction // inferred from reviewed computational analysis///0009965 // leaf morphog…
263582_at	AT2G17120	LYM2	0.0870962	0.00887311	4.37955	0006952 // defense response // inferred from electronic annotation///0009627 // systemic acquired resistance // inferred from reviewed computational analysis///0016998 // cell wall macromolecule catabolic process // inferred from electronic annotation///0016998 // cell wall macromolecule catabolic process // inferred from sequence or structural similarity///0034976 // response to endoplasmic reti…
266070_at	AT2G18660	EXLB3	0.0647065	0.0021224	7.87152	0009627 // systemic acquired resistance // inferred from reviewed computational analysis///0010230 // alternative respiration // inferred from direct assay///0034976 // response to endoplasmic reticulum stress // inferred from reviewed computational analysis
266017_at	AT2G18690		0.0818496	0.00680563	6.7726	0006569 // tryptophan catabolic process // inferred from reviewed computational analysis///0006612 // protein targeting to membrane // inferred from reviewed computational analysis///0009684 // indoleacetic acid biosynthetic process // inferred from reviewed computational analysis///0009863 // salicylic acid mediated signaling pathway // inferred from reviewed computational analysis///0010200 // …
265597_at	AT2G20142		0.0745464	0.0044553	9.81486	0007165 // signal transduction // inferred from electronic annotation
265305_at	AT2G20340		0.0618756	0.00145024	5.43464	0006520 // cellular amino acid metabolic process // inferred from sequence or structural similarity///0006559 // L-phenylalanine catabolic process // inferred from direct assay///0009611 // response to wounding // inferred from expression pattern///0019752 // carboxylic acid metabolic process // inferred from electronic annotation
265422_at	AT2G20800	NDB4	0.0654801	0.00219172	29.8071	0055114 // oxidation-reduction process // inferred from electronic annotation
263515_at	AT2G21640		0.082572	0.00714778	7.55953	0006979 // response to oxidative stress // inferred from direct assay
266799_at	AT2G22860	ATPSK2	0.0506235	0.00037104	13.5089	0007275 // multicellular organismal development // inferred from electronic annotation///0008283 // cell proliferation // inferred from electronic annotation///0008283 // cell proliferation // inferred from sequence or structural similarity///0009887 // organ morphogenesis // inferred from sequence or structural similarity///0030154 // cell differentiation // inferred from sequence or structural …
267256_s_at	AT2G23000///AT2G23010	scpl10	0.0717226	0.00379675	3.22107	0006508 // proteolysis // inferred from electronic annotation///0006508 // proteolysis // inferred from sequence or structural similarity
245076_at	AT2G23170	GH3.3	0.0713312	0.00350727	27.7671	0009733 // response to auxin stimulus // inferred from sequence or structural similarity///0010252 // auxin homeostasis // traceable author statement
267128_at	AT2G23620	MES1	0.0719882	0.00390339	4.77446	0006952 // defense response // inferred from electronic annotation///0009627 // systemic acquired resistance // inferred from genetic interaction///0009696 // salicylic acid metabolic process // inferred from mutant phenotype///0009817 // defense response to fungus, incompatible interaction // traceable author statement///0045087 // innate immune response // inferred from electronic annotation
265999_at	AT2G24100		0.0670578	0.00250225	5.16132
263539_at	AT2G24850	TAT3	0.0506235	0.000331364	66.4383	0006520 // cellular amino acid metabolic process // inferred from electronic annotation///0007165 // signal transduction // inferred from reviewed computational analysis///0009058 // biosynthetic process // inferred from electronic annotation///0009058 // biosynthetic process // inferred from sequence or structural similarity///0009414 // response to water deprivation // inferred from reviewed co…
245041_at	AT2G26530	AR781	0.0769094	0.00530004	7.6516	0006612 // protein targeting to membrane // inferred from reviewed computational analysis///0009611 // response to wounding // inferred from reviewed computational analysis///0009612 // response to mechanical stimulus // inferred from reviewed computational analysis///0009646 // response to absence of light // inferred from reviewed computational analysis///0009863 // salicylic acid mediated sign…
266316_at	AT2G27080		0.076959	0.00531136	4.34106
265276_at	AT2G28400		0.0631813	0.00165388	10.4586
266271_at	AT2G29440	ATGSTU6	0.0506235	0.000181804	5.70778	0009407 // toxin catabolic process // traceable author statement///0009636 // response to toxic substance // inferred from electronic annotation
266267_at	AT2G29460	ATGSTU4	0.064916	0.00214484	26.2433	0009407 // toxin catabolic process // inferred from reviewed computational analysis///0009407 // toxin catabolic process // traceable author statement///0009636 // response to toxic substance // inferred from electronic annotation///0010583 // response to cyclopentenone // inferred from reviewed computational analysis
266832_at	AT2G30040	MAPKKK14	0.0876869	0.00915592	6.40067	0006468 // protein phosphorylation // inferred from electronic annotation///0009658 // chloroplast organization // inferred from mutant phenotype///0009737 // response to abscisic acid stimulus // inferred from reviewed computational analysis///0009738 // abscisic acid mediated signaling pathway // inferred from reviewed computational analysis///0009753 // response to jasmonic acid stimulus // in…
267300_at	AT2G30140		0.0876869	0.00911867	6.43714	0008152 // metabolic process // inferred from electronic annotation///0009407 // toxin catabolic process // inferred from reviewed computational analysis///0009627 // systemic acquired resistance // inferred from reviewed computational analysis///0009909 // regulation of flower development // inferred from mutant phenotype///0010583 // response to cyclopentenone // inferred from reviewed computat…
267246_at	AT2G30250	WRKY25	0.0870962	0.008865	11.3323	0002237 // response to molecule of bacterial origin // inferred from reviewed computational analysis///0006351 // transcription, DNA-dependent // inferred from electronic annotation///0006355 // regulation of transcription, DNA-dependent // inferred from electronic annotation///0006355 // regulation of transcription, DNA-dependent // inferred from sequence or structural similarity///0006612 // pr…
267496_at	AT2G30550		0.0791329	0.00589289	6.43911	0006612 // protein targeting to membrane // inferred from reviewed computational analysis///0006629 // lipid metabolic process // inferred from electronic annotation///0006629 // lipid metabolic process // inferred from sequence or structural similarity///0009697 // salicylic acid biosynthetic process // inferred from reviewed computational analysis///0009863 // salicylic acid mediated signaling …
265668_at	AT2G32020		0.08083	0.00646148	20.3542	0008152 // metabolic process // inferred from sequence or structural similarity///0009737 // response to abscisic acid stimulus // inferred from expression pattern
265725_at	AT2G32030		0.0867614	0.00874287	3.01407	0002679 // respiratory burst involved in defense response // inferred from reviewed computational analysis///0008152 // metabolic process // inferred from sequence or structural similarity///0009693 // ethylene biosynthetic process // inferred from reviewed computational analysis///0009723 // response to ethylene stimulus // inferred from reviewed computational analysis///0009738 // abscisic acid…
265680_at	AT2G32150		0.0727118	0.00405978	4.73346	0008152 // metabolic process // inferred from electronic annotation
265670_s_at	AT2G32190///AT2G32210		0.0676089	0.00259568	16.7997	0010200 // response to chitin // inferred from reviewed computational analysis
267546_at	AT2G32680	AtRLP23	0.0818496	0.0068082	13.5162	0000165 // MAPK cascade // inferred from reviewed computational analysis///0006355 // regulation of transcription, DNA-dependent // inferred from reviewed computational analysis///0006612 // protein targeting to membrane // inferred from reviewed computational analysis///0006952 // defense response // inferred from sequence or structural similarity///0007165 // signal transduction // inferred by …
255795_at	AT2G33380	RD20	0.0767544	0.00515133	22.5307	0009269 // response to desiccation // inferred from expression pattern///0009269 // response to desiccation // traceable author statement///0009409 // response to cold // inferred from expression pattern///0009409 // response to cold // inferred from reviewed computational analysis///0009414 // response to water deprivation // inferred from reviewed computational analysis///0009620 // response to…
256725_at	AT2G34070	TBL37	0.0714657	0.00370437	7.03983
267040_at	AT2G34300		0.0714354	0.00358197	3.21142	0032259 // methylation // inferred from electronic annotation
266901_at	AT2G34600	JAZ7	0.0748533	0.00462725	61.971	0002679 // respiratory burst involved in defense response // inferred from reviewed computational analysis///0006351 // transcription, DNA-dependent // inferred from electronic annotation///0006355 // regulation of transcription, DNA-dependent // inferred from electronic annotation///0006952 // defense response // inferred from electronic annotation///0007165 // signal transduction // inferred fr…
265200_s_at	AT2G36790///AT2G36800	UGT73C6	0.0857865	0.00845584	6.21491	0008152 // metabolic process // inferred from electronic annotation///0016131 // brassinosteroid metabolic process // inferred from direct assay///0051555 // flavonol biosynthetic process // inferred from direct assay///0051555 // flavonol biosynthetic process // inferred from mutant phenotype
266010_at	AT2G37430		0.082572	0.00719975	11.8111	0002679 // respiratory burst involved in defense response // inferred from reviewed computational analysis///0006351 // transcription, DNA-dependent // inferred from electronic annotation///0006355 // regulation of transcription, DNA-dependent // traceable author statement///0009693 // ethylene biosynthetic process // inferred from reviewed computational analysis///0010200 // response to chitin /…
267181_at	AT2G37760		0.0592021	0.000863303	7.19161	0006950 // response to stress // inferred from electronic annotation///0009409 // response to cold // inferred from expression pattern///0009414 // response to water deprivation // inferred from expression pattern///0009636 // response to toxic substance // inferred from electronic annotation///0009651 // response to salt stress // inferred from expression pattern///0046482 // para-aminobenzoic a…
267168_at	AT2G37770		0.0548241	0.000642232	31.8513	0006950 // response to stress // inferred from electronic annotation///0009409 // response to cold // inferred from expression pattern///0009414 // response to water deprivation // inferred from expression pattern///0009636 // response to toxic substance // inferred from electronic annotation///0009651 // response to salt stress // inferred from expression pattern///0055114 // oxidation-reduction…
267142_at	AT2G38290	ATAMT2	0.0838668	0.00785124	3.35881	0000165 // MAPK cascade // inferred from reviewed computational analysis///0002237 // response to molecule of bacterial origin // inferred from reviewed computational analysis///0006612 // protein targeting to membrane // inferred from reviewed computational analysis///0006810 // transport // inferred from electronic annotation///0006820 // anion transport // inferred from reviewed computational …
266420_at	AT2G38610		0.0506235	0.000331179	4.04203
266418_at	AT2G38750	ANNAT4	0.0506235	0.000377234	3.40577	0006950 // response to stress // inferred from electronic annotation///0006970 // response to osmotic stress // inferred from mutant phenotype///0009408 // response to heat // inferred from expression pattern///0009409 // response to cold // inferred from expression pattern///0009414 // response to water deprivation // inferred from expression pattern///0009651 // response to salt stress // infer…
266419_at	AT2G38760	ANNAT3	0.0767544	0.00506873	3.30309	0009408 // response to heat // inferred from expression pattern///0009409 // response to cold // inferred from expression pattern///0009414 // response to water deprivation // inferred from expression pattern///0009651 // response to salt stress // inferred from expression pattern
266989_at	AT2G39330	JAL23	0.0766784	0.00491296	7.1478
260522_x_at	AT2G41730		0.0663211	0.00237247	16.0936	0009061 // anaerobic respiration // inferred from expression pattern///0009061 // anaerobic respiration // inferred from mutant phenotype
260541_at	AT2G43530		0.0602289	0.00101039	3.07612	0000023 // maltose metabolic process // inferred from reviewed computational analysis///0006952 // defense response // inferred from electronic annotation///0019252 // starch biosynthetic process // inferred from reviewed computational analysis///0031640 // killing of cells of other organism // inferred from electronic annotation///0050832 // defense response to fungus // inferred from electronic…
260556_at	AT2G43620		0.0506235	0.000263835	10.2261	0002679 // respiratory burst involved in defense response // inferred from reviewed computational analysis///0005975 // carbohydrate metabolic process // inferred from electronic annotation///0006032 // chitin catabolic process // inferred from electronic annotation///0006865 // amino acid transport // inferred from reviewed computational analysis///0010200 // response to chitin // inferred from …
267229_s_at	AT2G44070///AT5G38640		0.0820862	0.00684899	9.27753	0006413 // translational initiation // inferred from sequence or structural similarity///0044237 // cellular metabolic process // inferred from electronic annotation///0045947 // negative regulation of translational initiation // not recorded///0050790 // regulation of catalytic activity // not recorded
267389_at	AT2G44460	BGLU28	0.0861441	0.00855212	13.8112	0005975 // carbohydrate metabolic process // inferred from electronic annotation///0008152 // metabolic process // inferred from electronic annotation///0080167 // response to karrikin // inferred from expression pattern
267393_at	AT2G44500		0.0851295	0.00823256	3.09634
266590_at	AT2G46240	BAG6	0.0610978	0.00131158	3.32983	0006457 // protein folding // inferred from reviewed computational analysis///0006915 // apoptotic process // inferred from electronic annotation///0006950 // response to stress // inferred from electronic annotation///0009408 // response to heat // inferred from expression pattern///0009408 // response to heat // inferred from reviewed computational analysis///0009409 // response to cold // infe…
266555_at	AT2G46270	GBF3	0.0897124	0.00994493	3.36887	0000303 // response to superoxide // inferred from reviewed computational analysis///0006351 // transcription, DNA-dependent // inferred from electronic annotation///0006355 // regulation of transcription, DNA-dependent // inferred from electronic annotation///0007165 // signal transduction // inferred from reviewed computational analysis///0009410 // response to xenobiotic stimulus // inferred f…
265452_at	AT2G46510	ATAIB	0.0583832	0.000788308	5.92787	0006351 // transcription, DNA-dependent // inferred from electronic annotation///0006355 // regulation of transcription, DNA-dependent // traceable author statement///0006612 // protein targeting to membrane // inferred from reviewed computational analysis///0007165 // signal transduction // inferred from reviewed computational analysis///0009414 // response to water deprivation // inferred from …
266752_at	AT2G47000	ABCB4	0.082572	0.00730778	9.35541	0000303 // response to superoxide // inferred from reviewed computational analysis///0006200 // ATP catabolic process // inferred from electronic annotation///0006810 // transport // inferred from electronic annotation///0006888 // ER to Golgi vesicle-mediated transport // inferred from reviewed computational analysis///0007165 // signal transduction // inferred from reviewed computational analys…
263320_at	AT2G47180	AtGolS1	0.0506235	0.000310681	6.7278	0005975 // carbohydrate metabolic process // inferred from electronic annotation///0006012 // galactose metabolic process // inferred from direct assay///0006979 // response to oxidative stress // inferred from expression pattern///0009408 // response to heat // inferred from expression pattern///0009409 // response to cold // inferred from mutant phenotype///0009414 // response to water deprivat…
245173_at	AT2G47520	HRE2	0.0676089	0.00284435	18.1911	0006351 // transcription, DNA-dependent // inferred from electronic annotation///0006355 // regulation of transcription, DNA-dependent // inferred from electronic annotation///0006355 // regulation of transcription, DNA-dependent // inferred from sequence or structural similarity///0009873 // ethylene mediated signaling pathway // inferred from electronic annotation///0034059 // response to anoxi…
258947_at	AT3G01830		0.0870962	0.00889767	20.9622	0000165 // MAPK cascade // inferred from reviewed computational analysis///0002679 // respiratory burst involved in defense response // inferred from reviewed computational analysis///0006612 // protein targeting to membrane // inferred from reviewed computational analysis///0009693 // ethylene biosynthetic process // inferred from reviewed computational analysis///0009697 // salicylic acid biosy…
258815_at	AT3G04000		0.0673209	0.00255546	15.7047	0008152 // metabolic process // inferred from electronic annotation///0008152 // metabolic process // inferred from sequence or structural similarity///0009407 // toxin catabolic process // inferred from reviewed computational analysis///0010583 // response to cyclopentenone // inferred from reviewed computational analysis///0046482 // para-aminobenzoic acid metabolic process // inferred from rev…
258537_at	AT3G04210		0.0748533	0.00462778	3.34037	0006952 // defense response // inferred from electronic annotation///0006952 // defense response // inferred from sequence or structural similarity///0007165 // signal transduction // inferred from electronic annotation///0009627 // systemic acquired resistance // inferred from reviewed computational analysis///0031347 // regulation of defense response // inferred from reviewed computational anal…
259133_at	AT3G05400		0.0897124	0.00996487	3.53024	0006810 // transport // inferred from electronic annotation///0008643 // carbohydrate transport // inferred from electronic annotation///0055085 // transmembrane transport // inferred from electronic annotation
258887_at	AT3G05630	PLDP2	0.0592021	0.000860563	3.07601	0006629 // lipid metabolic process // inferred from electronic annotation///0006635 // fatty acid beta-oxidation // inferred from reviewed computational analysis///0006995 // cellular response to nitrogen starvation // inferred from expression pattern///0007568 // aging // inferred from reviewed computational analysis///0008152 // metabolic process // inferred from electronic annotation///0009395…
258894_at	AT3G05650	AtRLP32	0.0767544	0.00502143	5.13121	0000165 // MAPK cascade // inferred from reviewed computational analysis///0006355 // regulation of transcription, DNA-dependent // inferred from reviewed computational analysis///0006612 // protein targeting to membrane // inferred from reviewed computational analysis///0006952 // defense response // inferred from sequence or structural similarity///0007165 // signal transduction // inferred by …
259033_at	AT3G09405///AT3G09410		0.082444	0.00704985	8.52027
258650_at	AT3G09830		0.0767544	0.00514094	4.11523	0006468 // protein phosphorylation // inferred from electronic annotation///0006612 // protein targeting to membrane // inferred from reviewed computational analysis///0006944 // cellular membrane fusion // inferred from reviewed computational analysis///0009627 // systemic acquired resistance // inferred from reviewed computational analysis///0009693 // ethylene biosynthetic process // inferred …
258941_at	AT3G09940	MDHAR	0.0637234	0.0019684	8.09189	0007165 // signal transduction // inferred from reviewed computational analysis///0009414 // response to water deprivation // inferred from expression pattern///0009414 // response to water deprivation // inferred from reviewed computational analysis///0009610 // response to symbiotic fungus // inferred from expression pattern///0009611 // response to wounding // inferred from reviewed computatio…
256430_at	AT3G11020	DREB2B	0.0686913	0.00308511	8.29175	0006351 // transcription, DNA-dependent // inferred from electronic annotation///0006355 // regulation of transcription, DNA-dependent // inferred from electronic annotation///0006355 // regulation of transcription, DNA-dependent // inferred from sequence or structural similarity///0006950 // response to stress // inferred from electronic annotation///0009414 // response to water deprivation // t…
256252_at	AT3G11340		0.0670578	0.00241825	8.53812	0006952 // defense response // inferred from mutant phenotype///0008152 // metabolic process // inferred from electronic annotation///0010150 // leaf senescence // inferred from mutant phenotype///0050832 // defense response to fungus // inferred from expression pattern
258787_at	AT3G11840	PUB24	0.0815929	0.00669305	5.94588	0000165 // MAPK cascade // inferred from reviewed computational analysis///0002679 // respiratory burst involved in defense response // inferred from genetic interaction///0002679 // respiratory burst involved in defense response // inferred from reviewed computational analysis///0006499 // N-terminal protein myristoylation // inferred from reviewed computational analysis///0006612 // protein tar…
256244_at	AT3G12520	SULTR4;2	0.0705781	0.00335867	4.03762	0006810 // transport // inferred from electronic annotation///0008272 // sulfate transport // inferred from electronic annotation///0055085 // transmembrane transport // inferred from electronic annotation
257185_at	AT3G13100	ATMRP7	0.0630228	0.00163769	3.06285	0006200 // ATP catabolic process // inferred from electronic annotation///0006810 // transport // inferred from electronic annotation///0009627 // systemic acquired resistance // inferred from reviewed computational analysis///0009697 // salicylic acid biosynthetic process // inferred from reviewed computational analysis///0051707 // response to other organism // inferred from expression pattern/…
258063_at	AT3G14620	CYP72A8	0.0756745	0.00473779	3.5669	0007623 // circadian rhythm // inferred from expression pattern///0055114 // oxidation-reduction process // inferred from electronic annotation
258189_at	AT3G17860	JAZ3	0.0791329	0.00605445	3.21328	0006351 // transcription, DNA-dependent // inferred from electronic annotation///0006355 // regulation of transcription, DNA-dependent // inferred from electronic annotation///0006952 // defense response // inferred from electronic annotation///0009611 // response to wounding // inferred from reviewed computational analysis///0009695 // jasmonic acid biosynthetic process // inferred from reviewed…
256922_at	AT3G19010		0.063618	0.00167899	3.90201	0006612 // protein targeting to membrane // inferred from reviewed computational analysis///0009813 // flavonoid biosynthetic process // inferred from sequence or structural similarity///0009963 // positive regulation of flavonoid biosynthetic process // inferred from reviewed computational analysis///0010363 // regulation of plant-type hypersensitive response // inferred from reviewed computatio…
257026_at	AT3G19200		0.0506235	0.000118049	4.62401	0010089 // xylem development // inferred from reviewed computational analysis///0044036 // cell wall macromolecule metabolic process // inferred from reviewed computational analysis
257022_at	AT3G19580	AZF2	0.0696584	0.00321094	6.85267	0002679 // respiratory burst involved in defense response // inferred from reviewed computational analysis///0006351 // transcription, DNA-dependent // inferred from electronic annotation///0006355 // regulation of transcription, DNA-dependent // inferred from electronic annotation///0007165 // signal transduction // inferred from reviewed computational analysis///0009414 // response to water dep…
256627_at	AT3G19970		0.082572	0.00722027	8.50372	0006612 // protein targeting to membrane // inferred from reviewed computational analysis///0009414 // response to water deprivation // inferred from reviewed computational analysis///0009611 // response to wounding // inferred from reviewed computational analysis///0009620 // response to fungus // inferred from reviewed computational analysis///0009695 // jasmonic acid biosynthetic process // in…
258452_at	AT3G22370	AOX1A	0.0670578	0.00242439	7.07273	0007585 // respiratory gaseous exchange // inferred from electronic annotation///0009409 // response to cold // inferred from mutant phenotype///0031930 // mitochondria-nucleus signaling pathway // inferred from expression pattern///0045333 // cellular respiration // inferred from direct assay///0055114 // oxidation-reduction process // inferred from electronic annotation///0055114 // oxidation-r…
257919_at	AT3G23250	MYB15	0.0670578	0.00246854	27.2433	0002679 // respiratory burst involved in defense response // inferred from reviewed computational analysis///0006355 // regulation of transcription, DNA-dependent // inferred from sequence or structural similarity///0007165 // signal transduction // inferred from reviewed computational analysis///0009414 // response to water deprivation // inferred from reviewed computational analysis///0009611 /…
257100_at	AT3G25010	AtRLP41	0.0847071	0.00814108	9.50326	0006952 // defense response // inferred from sequence or structural similarity///0007165 // signal transduction // inferred by curator///0009627 // systemic acquired resistance // inferred from reviewed computational analysis///0034976 // response to endoplasmic reticulum stress // inferred from reviewed computational analysis
257840_at	AT3G25250	AGC2-1	0.0602289	0.00100615	19.1929	0006468 // protein phosphorylation // inferred from direct assay///0006468 // protein phosphorylation // inferred from electronic annotation///0006952 // defense response // inferred from electronic annotation///0006979 // response to oxidative stress // inferred from expression pattern///0009611 // response to wounding // inferred from expression pattern///0010200 // response to chitin // inferr…
256762_at	AT3G25655	IDL1	0.0506235	5.85439e-05	18.3175	0010227 // floral organ abscission // inferred from mutant phenotype///0048765 // root hair cell differentiation // inferred from reviewed computational analysis
257644_at	AT3G25780	AOC3	0.0714354	0.00354557	5.32925	0006612 // protein targeting to membrane // inferred from reviewed computational analysis///0009611 // response to wounding // inferred from reviewed computational analysis///0009620 // response to fungus // inferred from expression pattern///0009620 // response to fungus // inferred from reviewed computational analysis///0009651 // response to salt stress // inferred from expression pattern///00…
257830_at	AT3G26690	ATNUDX13	0.0712002	0.0034609	3.16193
258259_s_at	AT3G26820///AT3G26840		0.0676089	0.00286382	10.402	0008152 // metabolic process // inferred from electronic annotation///0019432 // triglyceride biosynthetic process // inferred from genetic interaction///0033306 // phytol metabolic process // inferred from direct assay
257071_at	AT3G28180	ATCSLC04	0.082572	0.00730116	3.54971
256577_at	AT3G28220		0.0838668	0.00787927	3.64331	0031540 // regulation of anthocyanin biosynthetic process // inferred from reviewed computational analysis
256601_s_at	AT3G28290///AT3G28300	AT14A	0.0506235	2.99357e-05	9.82797	0008360 // regulation of cell shape // inferred from mutant phenotype///0016337 // cell-cell adhesion // inferred from mutant phenotype
256989_at	AT3G28580		0.0676089	0.0027317	10.3874	0009723 // response to ethylene stimulus // inferred from reviewed computational analysis///0009737 // response to abscisic acid stimulus // inferred from expression pattern///0009737 // response to abscisic acid stimulus // inferred from reviewed computational analysis
256583_at	AT3G28850		0.0767544	0.00518781	4.68138	0045454 // cell redox homeostasis // inferred from electronic annotation///0048653 // anther development // inferred from reviewed computational analysis
258002_at	AT3G28930	AIG2	0.0880592	0.00931539	5.26161	0000165 // MAPK cascade // inferred from reviewed computational analysis///0002237 // response to molecule of bacterial origin // inferred from reviewed computational analysis///0006612 // protein targeting to membrane // inferred from reviewed computational analysis///0009409 // response to cold // inferred from reviewed computational analysis///0009595 // detection of biotic stimulus // inferre…
252652_at	AT3G44720	ADT4	0.0518933	0.000463266	3.16592	0006612 // protein targeting to membrane // inferred from reviewed computational analysis///0008652 // cellular amino acid biosynthetic process // inferred from electronic annotation///0009073 // aromatic amino acid family biosynthetic process // inferred from electronic annotation///0009094 // L-phenylalanine biosynthetic process // inferred from electronic annotation///0009094 // L-phenylalanin…
246340_s_at	AT3G44860///AT3G44870	FAMT	0.0683769	0.00301366	38.5182	0032259 // methylation // inferred from electronic annotation
252611_at	AT3G45130	LAS1	0.0695906	0.00319196	7.98439	0016126 // sterol biosynthetic process // inferred from reviewed computational analysis///0019745 // pentacyclic triterpenoid biosynthetic process // inferred from sequence or structural similarity///0019745 // pentacyclic triterpenoid biosynthetic process // inferred from reviewed computational analysis
252618_at	AT3G45140	LOX2	0.0518933	0.000503405	3.10331	0000023 // maltose metabolic process // inferred from reviewed computational analysis///0000096 // sulfur amino acid metabolic process // inferred from reviewed computational analysis///0006546 // glycine catabolic process // inferred from reviewed computational analysis///0006629 // lipid metabolic process // inferred from electronic annotation///0006631 // fatty acid metabolic process // inferr…
252539_at	AT3G45730		0.0757863	0.00478823	10.4803
252563_at	AT3G45970	ATEXLA1	0.0620601	0.00147192	8.40921	0009826 // unidimensional cell growth // non-traceable author statement///0009828 // plant-type cell wall loosening // non-traceable author statement
252533_at	AT3G46110		0.0769005	0.00529453	6.50246
252482_at	AT3G46670	UGT76E11	0.0872761	0.00899943	4.4807	0008152 // metabolic process // inferred from electronic annotation
252417_at	AT3G47480		0.0719882	0.00388252	6.80497	0000165 // MAPK cascade // inferred from reviewed computational analysis///0002237 // response to molecule of bacterial origin // inferred from reviewed computational analysis///0002679 // respiratory burst involved in defense response // inferred from reviewed computational analysis///0006612 // protein targeting to membrane // inferred from reviewed computational analysis///0006944 // cellular …
252179_at	AT3G50760	GATL2	0.0794704	0.0062289	5.12082	0009611 // response to wounding // inferred from reviewed computational analysis///0009620 // response to fungus // inferred from reviewed computational analysis///0009695 // jasmonic acid biosynthetic process // inferred from reviewed computational analysis///0009753 // response to jasmonic acid stimulus // inferred from reviewed computational analysis///0016051 // carbohydrate biosynthetic proc…
252131_at	AT3G50930	BCS1	0.0506235	0.00022964	48.365	0009611 // response to wounding // inferred from reviewed computational analysis///0009612 // response to mechanical stimulus // inferred from reviewed computational analysis///0009627 // systemic acquired resistance // inferred from reviewed computational analysis///0009697 // salicylic acid biosynthetic process // inferred from reviewed computational analysis///0010200 // response to chitin // …
252117_at	AT3G51430	YLS2	0.0518933	0.000474487	5.32288	0009058 // biosynthetic process // inferred from electronic annotation///0009821 // alkaloid biosynthetic process // inferred from sequence or structural similarity
252068_at	AT3G51440		0.06365	0.00182009	3.35238	0009058 // biosynthetic process // inferred from electronic annotation///0009821 // alkaloid biosynthetic process // inferred from sequence or structural similarity
252114_at	AT3G51450		0.0630147	0.00162589	11.0353	0009058 // biosynthetic process // inferred from electronic annotation///0009611 // response to wounding // inferred from reviewed computational analysis///0009620 // response to fungus // inferred from reviewed computational analysis///0009694 // jasmonic acid metabolic process // inferred from reviewed computational analysis///0009695 // jasmonic acid biosynthetic process // inferred from revie…
246302_at	AT3G51860	CAX3	0.0518933	0.000467591	12.0424	0006793 // phosphorus metabolic process // inferred from genetic interaction///0006810 // transport // inferred from electronic annotation///0006811 // ion transport // inferred from electronic annotation///0006812 // cation transport // inferred from electronic annotation///0006812 // cation transport // inferred from sequence or structural similarity///0006814 // sodium ion transport // inferre…
252037_at	AT3G51920	CAM9	0.0610978	0.00133003	3.38918	0005513 // detection of calcium ion // inferred from sequence or structural similarity///0009269 // response to desiccation // inferred from reviewed computational analysis///0009409 // response to cold // inferred from reviewed computational analysis///0009414 // response to water deprivation // inferred from mutant phenotype///0009612 // response to mechanical stimulus // inferred from reviewed…
251884_at	AT3G54150		0.0880592	0.00936896	11.0493	0008152 // metabolic process // inferred from electronic annotation///0009723 // response to ethylene stimulus // inferred from reviewed computational analysis///0009738 // abscisic acid mediated signaling pathway // inferred from reviewed computational analysis///0032259 // methylation // inferred from electronic annotation///0035556 // intracellular signal transduction // inferred from reviewed…
251770_at	AT3G55970	JRG21	0.0788877	0.00575794	33.7884	0043090 // amino acid import // inferred from reviewed computational analysis///0055114 // oxidation-reduction process // inferred from electronic annotation
246293_at	AT3G56710	SIB1	0.0857865	0.00845332	6.20725	0000165 // MAPK cascade // inferred from reviewed computational analysis///0006952 // defense response // inferred from electronic annotation///0006995 // cellular response to nitrogen starvation // inferred from reviewed computational analysis///0009627 // systemic acquired resistance // inferred from reviewed computational analysis///0009697 // salicylic acid biosynthetic process // inferred fr…
251625_at	AT3G57260	BGL2	0.0506235	0.000345403	27.6241	0000165 // MAPK cascade // inferred from reviewed computational analysis///0002679 // respiratory burst involved in defense response // inferred from reviewed computational analysis///0005975 // carbohydrate metabolic process // inferred from electronic annotation///0006612 // protein targeting to membrane // inferred from reviewed computational analysis///0006944 // cellular membrane fusion // i…
251621_at	AT3G57700		0.0576678	0.000728242	8.33431	0000165 // MAPK cascade // inferred from reviewed computational analysis///0006468 // protein phosphorylation // inferred from electronic annotation///0009693 // ethylene biosynthetic process // inferred from reviewed computational analysis///0009697 // salicylic acid biosynthetic process // inferred from reviewed computational analysis///0009862 // systemic acquired resistance, salicylic acid me…
251432_at	AT3G59820		0.0843259	0.00804754	3.25263
251428_at	AT3G60140	DIN2	0.0803521	0.00639194	59.2866	0005975 // carbohydrate metabolic process // inferred from electronic annotation///0007568 // aging // inferred from expression pattern///0008152 // metabolic process // inferred from electronic annotation///0009744 // response to sucrose stimulus // inferred from reviewed computational analysis///0009750 // response to fructose stimulus // inferred from reviewed computational analysis///0009830 …
251400_at	AT3G60420		0.0506235	0.000131605	14.0518	0002237 // response to molecule of bacterial origin // inferred from reviewed computational analysis///0009627 // systemic acquired resistance // inferred from reviewed computational analysis///0009697 // salicylic acid biosynthetic process // inferred from reviewed computational analysis///0009863 // salicylic acid mediated signaling pathway // inferred from reviewed computational analysis///003…
251282_at	AT3G61630	CRF6	0.0700625	0.00330656	11.4275	0006351 // transcription, DNA-dependent // inferred from electronic annotation///0006355 // regulation of transcription, DNA-dependent // inferred from electronic annotation///0006355 // regulation of transcription, DNA-dependent // inferred from sequence or structural similarity///0009736 // cytokinin mediated signaling pathway // inferred from electronic annotation///0009793 // embryo developme…
251192_at	AT3G62720	XT1	0.0832957	0.00764998	4.33847	0000271 // polysaccharide biosynthetic process // inferred from direct assay///0006486 // protein glycosylation // inferred from electronic annotation///0009612 // response to mechanical stimulus // inferred from reviewed computational analysis///0009969 // xyloglucan biosynthetic process // inferred from genetic interaction///0010200 // response to chitin // inferred from reviewed computational …
255506_at	AT4G02130	GATL6	0.0289883	5.53882e-06	3.02835	0016051 // carbohydrate biosynthetic process // inferred from sequence or structural similarity///0045489 // pectin biosynthetic process // inferred from electronic annotation
255524_at	AT4G02330	ATPMEPCRB	0.0872761	0.00896696	4.56162	0009409 // response to cold // inferred from expression pattern///0009741 // response to brassinosteroid stimulus // inferred from expression pattern///0015824 // proline transport // inferred from reviewed computational analysis///0042545 // cell wall modification // inferred from electronic annotation///0043086 // negative regulation of catalytic activity // inferred from electronic annotation/…
255348_at	AT4G03820		0.0880592	0.00931285	5.93524
255341_at	AT4G04500	CRK37	0.0776169	0.00550698	10.3177	0006468 // protein phosphorylation // inferred from electronic annotation///0009627 // systemic acquired resistance // inferred from reviewed computational analysis///0009697 // salicylic acid biosynthetic process // inferred from reviewed computational analysis///0016310 // phosphorylation // inferred from electronic annotation///0034976 // response to endoplasmic reticulum stress // inferred fr…
255116_at	AT4G08850		0.0714354	0.00354268	3.90941	0006468 // protein phosphorylation // inferred from electronic annotation///0006857 // oligopeptide transport // inferred from reviewed computational analysis///0006995 // cellular response to nitrogen starvation // inferred from reviewed computational analysis///0009627 // systemic acquired resistance // inferred from reviewed computational analysis///0016310 // phosphorylation // inferred from …
255065_s_at	AT4G08870///AT4G08900		0.0506235	0.000298855	5.75723	0000050 // urea cycle // inferred from electronic annotation///0006525 // arginine metabolic process // inferred from electronic annotation///0006527 // arginine catabolic process // inferred from genetic interaction///0006560 // proline metabolic process // inferred from mutant phenotype///0006570 // tyrosine metabolic process // inferred from mutant phenotype///0006591 // ornithine metabolic pr…
255080_at	AT4G09030	AGP10	0.0820862	0.0069008	3.59549
254996_at	AT4G10390		0.0608602	0.00121692	4.18276	0006468 // protein phosphorylation // inferred from electronic annotation///0009611 // response to wounding // inferred from expression pattern///0009611 // response to wounding // inferred from reviewed computational analysis///0009620 // response to fungus // inferred from reviewed computational analysis///0009695 // jasmonic acid biosynthetic process // inferred from reviewed computational ana…
254869_at	AT4G11890		0.0592021	0.000841072	13.4759	0000165 // MAPK cascade // inferred from reviewed computational analysis///0002237 // response to molecule of bacterial origin // inferred from reviewed computational analysis///0006468 // protein phosphorylation // inferred from electronic annotation///0008152 // metabolic process // inferred from electronic annotation///0009409 // response to cold // inferred from expression pattern///0009414 /…
254833_s_at	AT4G12280///AT4G12290		0.0602289	0.00104093	7.18224	0009308 // amine metabolic process // inferred from electronic annotation///0055114 // oxidation-reduction process // inferred from electronic annotation
254741_s_at	AT4G13900///AT4G13920	AtRLP49	0.0764689	0.00487519	4.24768	0006952 // defense response // inferred from sequence or structural similarity///0007165 // signal transduction // inferred by curator
245329_at	AT4G14365	XBAT34	0.0654801	0.00221055	6.958	0000165 // MAPK cascade // inferred from reviewed computational analysis///0002237 // response to molecule of bacterial origin // inferred from reviewed computational analysis///0002679 // respiratory burst involved in defense response // inferred from reviewed computational analysis///0006612 // protein targeting to membrane // inferred from reviewed computational analysis///0006944 // cellular …
245253_at	AT4G15440	HPL1	0.0760268	0.00481795	3.03113	0006569 // tryptophan catabolic process // inferred from reviewed computational analysis///0006631 // fatty acid metabolic process // inferred from sequence or structural similarity///0009611 // response to wounding // inferred from expression pattern///0009684 // indoleacetic acid biosynthetic process // inferred from reviewed computational analysis///0055114 // oxidation-reduction process // in…
245352_at	AT4G15490	UGT84A3	0.0556777	0.000684315	4.58754	0008152 // metabolic process // inferred from electronic annotation
245422_at	AT4G17470		0.0712002	0.00345553	3.98894	0006464 // cellular protein modification process // inferred from electronic annotation
254707_at	AT4G18010	AT5PTASE2	0.0870962	0.00889126	5.49665	0007165 // signal transduction // inferred from reviewed computational analysis///0009414 // response to water deprivation // inferred from reviewed computational analysis///0009611 // response to wounding // inferred from reviewed computational analysis///0009723 // response to ethylene stimulus // inferred from reviewed computational analysis///0009733 // response to auxin stimulus // inferred …
254562_at	AT4G19230	CYP707A1	0.0872761	0.00899075	11.1638	0006950 // response to stress // inferred from electronic annotation///0009639 // response to red or far red light // inferred from expression pattern///0009687 // abscisic acid metabolic process // inferred from mutant phenotype///0046345 // abscisic acid catabolic process // inferred from electronic annotation///0048838 // release of seed from dormancy // inferred from mutant phenotype///005083…
254416_at	AT4G21380	ARK3	0.0820862	0.00690834	5.45959	0006468 // protein phosphorylation // inferred from electronic annotation///0007178 // transmembrane receptor protein serine/threonine kinase signaling pathway // inferred from sequence or structural similarity///0016310 // phosphorylation // inferred from electronic annotation///0046777 // protein autophosphorylation // inferred from reviewed computational analysis///0048544 // recognition of po…
254385_s_at	AT4G21830///AT4G21840	ATMSRB7	0.0506235	0.000118384	8.00671	0000304 // response to singlet oxygen // inferred from expression pattern///0055114 // oxidation-reduction process // inferred from electronic annotation
254380_at	AT4G21865		0.082572	0.00721488	3.07112
254326_at	AT4G22610		0.0867342	0.008712	6.54577	0006869 // lipid transport // inferred from electronic annotation///0006869 // lipid transport // inferred from sequence or structural similarity
254293_at	AT4G23060	IQD22	0.0717226	0.00378489	3.70755	0009739 // response to gibberellin stimulus // inferred from expression pattern
254271_at	AT4G23150	CRK7	0.06365	0.00186741	20.1751	0006468 // protein phosphorylation // inferred from electronic annotation///0009627 // systemic acquired resistance // inferred from reviewed computational analysis///0009697 // salicylic acid biosynthetic process // inferred from reviewed computational analysis///0016310 // phosphorylation // inferred from electronic annotation///0034976 // response to endoplasmic reticulum stress // inferred fr…
254229_at	AT4G23610		0.0825666	0.00711291	3.40752
254200_at	AT4G24110		0.0714354	0.00362493	5.11858	0080167 // response to karrikin // inferred from expression pattern
254158_at	AT4G24380		0.0602289	0.00108909	9.611	0009611 // response to wounding // inferred from reviewed computational analysis///0009620 // response to fungus // inferred from reviewed computational analysis///0009693 // ethylene biosynthetic process // inferred from reviewed computational analysis///0009695 // jasmonic acid biosynthetic process // inferred from reviewed computational analysis///0009753 // response to jasmonic acid stimulus …
254042_at	AT4G25810	XTR6	0.0630147	0.00163346	34.0012	0005975 // carbohydrate metabolic process // inferred from electronic annotation///0006073 // cellular glucan metabolic process // inferred from electronic annotation///0008152 // metabolic process // inferred from electronic annotation
253937_at	AT4G26890	MAPKKK16	0.0815929	0.00669851	5.4654	0006468 // protein phosphorylation // inferred from electronic annotation///0016310 // phosphorylation // inferred from electronic annotation///0046777 // protein autophosphorylation // inferred from direct assay
253890_s_at	AT4G27585///AT5G54100		0.0839725	0.00796351	3.35497
253841_at	AT4G27830	BGLU10	0.0518933	0.000482603	3.63827	0005975 // carbohydrate metabolic process // inferred from electronic annotation///0008152 // metabolic process // inferred from electronic annotation///0009610 // response to symbiotic fungus // inferred from reviewed computational analysis///0046283 // anthocyanin-containing compound metabolic process // inferred from mutant phenotype
253824_at	AT4G27940	MTM1	0.0791329	0.0061069	4.91772	0006810 // transport // inferred from sequence or structural similarity///0006828 // manganese ion transport // inferred from sequence or structural similarity///0006839 // mitochondrial transport // inferred from sequence or structural similarity///1901562 // response to paraquat // inferred from expression pattern
253796_at	AT4G28460		0.077878	0.00560983	36.0013
253779_at	AT4G28490	HAE	0.0714354	0.00357336	3.64143	0002237 // response to molecule of bacterial origin // inferred from reviewed computational analysis///0006468 // protein phosphorylation // inferred from electronic annotation///0006468 // protein phosphorylation // inferred from sequence or structural similarity///0007165 // signal transduction // inferred from reviewed computational analysis///0007169 // transmembrane receptor protein tyrosine…
253666_at	AT4G30270	MERI5B	0.0654994	0.00230483	3.42239	0005975 // carbohydrate metabolic process // inferred from electronic annotation///0006073 // cellular glucan metabolic process // inferred from electronic annotation///0007568 // aging // inferred from expression pattern///0008152 // metabolic process // inferred from electronic annotation///0009739 // response to gibberellin stimulus // inferred from genetic interaction///0009740 // gibberellic…
253453_at	AT4G31860		0.0830075	0.0075411	3.35066	0006470 // protein dephosphorylation // inferred from electronic annotation///0009610 // response to symbiotic fungus // inferred from reviewed computational analysis///0016036 // cellular response to phosphate starvation // inferred from reviewed computational analysis///0019375 // galactolipid biosynthetic process // inferred from reviewed computational analysis///0042631 // cellular response t…
253405_at	AT4G32800		0.0838668	0.00784936	5.69505	0006351 // transcription, DNA-dependent // inferred from electronic annotation///0006355 // regulation of transcription, DNA-dependent // inferred from electronic annotation///0006355 // regulation of transcription, DNA-dependent // inferred from sequence or structural similarity///0009873 // ethylene mediated signaling pathway // inferred from electronic annotation
253414_at	AT4G33050	EDA39	0.06365	0.00181335	5.92588	0000165 // MAPK cascade // inferred from reviewed computational analysis///0002237 // response to molecule of bacterial origin // inferred from reviewed computational analysis///0002679 // respiratory burst involved in defense response // inferred from reviewed computational analysis///0006569 // tryptophan catabolic process // inferred from reviewed computational analysis///0006612 // protein ta…
253203_at	AT4G34710	ADC2	0.06365	0.00173529	3.76588	0006527 // arginine catabolic process // inferred from electronic annotation///0006596 // polyamine biosynthetic process // inferred from mutant phenotype///0006612 // protein targeting to membrane // inferred from reviewed computational analysis///0006970 // response to osmotic stress // inferred from mutant phenotype///0006979 // response to oxidative stress // inferred from expression pattern/…
253215_at	AT4G34950		0.0602289	0.00103623	6.67864	0007623 // circadian rhythm // inferred from reviewed computational analysis///0019761 // glucosinolate biosynthetic process // inferred from reviewed computational analysis
253046_at	AT4G37370	CYP81D8	0.0592021	0.000852246	48.5664	0009723 // response to ethylene stimulus // inferred from reviewed computational analysis///0010286 // heat acclimation // inferred from reviewed computational analysis///0055114 // oxidation-reduction process // inferred from electronic annotation///0080167 // response to karrikin // inferred from expression pattern
252997_at	AT4G38400	ATEXLA2	0.0604408	0.0011587	5.48196	0009664 // plant-type cell wall organization // inferred from sequence or structural similarity///0009826 // unidimensional cell growth // non-traceable author statement///0009828 // plant-type cell wall loosening // non-traceable author statement///0019953 // sexual reproduction // inferred from electronic annotation
252993_at	AT4G38540		0.0670469	0.00240841	5.35888	0008152 // metabolic process // inferred from electronic annotation///0009407 // toxin catabolic process // inferred from reviewed computational analysis///0010583 // response to cyclopentenone // inferred from reviewed computational analysis///0050832 // defense response to fungus // inferred from expression pattern///0055114 // oxidation-reduction process // inferred from electronic annotation
252921_at	AT4G39030	EDS5	0.0506235	0.000308054	3.78049	0000096 // sulfur amino acid metabolic process // inferred from reviewed computational analysis///0000165 // MAPK cascade // inferred from reviewed computational analysis///0006520 // cellular amino acid metabolic process // inferred from reviewed computational analysis///0006546 // glycine catabolic process // inferred from reviewed computational analysis///0006612 // protein targeting to membra…
252908_at	AT4G39670		0.0893528	0.00979545	28.5973	0002679 // respiratory burst involved in defense response // inferred from reviewed computational analysis///0006612 // protein targeting to membrane // inferred from reviewed computational analysis///0006984 // ER-nucleus signaling pathway // inferred from reviewed computational analysis///0009697 // salicylic acid biosynthetic process // inferred from reviewed computational analysis///0009723 /…
251054_at	AT5G01540	LECRKA4.1	0.0602289	0.00113304	7.0809	0000165 // MAPK cascade // inferred from reviewed computational analysis///0006468 // protein phosphorylation // inferred from electronic annotation///0006612 // protein targeting to membrane // inferred from reviewed computational analysis///0007154 // cell communication // inferred from reviewed computational analysis///0009409 // response to cold // inferred from reviewed computational analysi…
251028_at	AT5G02230		0.0772378	0.00542357	3.47565	0008152 // metabolic process // inferred from electronic annotation
250948_at	AT5G03490		0.0623864	0.00153373	3.5088	0008152 // metabolic process // inferred from electronic annotation
250793_at	AT5G05600		0.0816562	0.00675571	13.6076	0009611 // response to wounding // inferred from reviewed computational analysis///0009620 // response to fungus // inferred from reviewed computational analysis///0009695 // jasmonic acid biosynthetic process // inferred from reviewed computational analysis///0009753 // response to jasmonic acid stimulus // inferred from reviewed computational analysis///0009867 // jasmonic acid mediated signali…
250722_at	AT5G06190		0.082572	0.00728483	3.85388
250669_at	AT5G06870	PGIP2	0.0506235	0.000360104	6.80775	0000165 // MAPK cascade // inferred from reviewed computational analysis///0006355 // regulation of transcription, DNA-dependent // inferred from reviewed computational analysis///0006612 // protein targeting to membrane // inferred from reviewed computational analysis///0006952 // defense response // inferred from sequence or structural similarity///0007165 // signal transduction // inferred by …
250662_at	AT5G07010	ST2A	0.0813058	0.0065455	10.3112	0009611 // response to wounding // inferred from reviewed computational analysis///0009694 // jasmonic acid metabolic process // inferred from direct assay///0009694 // jasmonic acid metabolic process // inferred from reviewed computational analysis///0009695 // jasmonic acid biosynthetic process // inferred from reviewed computational analysis///0009753 // response to jasmonic acid stimulus // i…
250515_at	AT5G09570		0.0678747	0.0029007	3.81436	0016036 // cellular response to phosphate starvation // inferred from reviewed computational analysis///0019375 // galactolipid biosynthetic process // inferred from reviewed computational analysis///0045892 // negative regulation of transcription, DNA-dependent // inferred from reviewed computational analysis
250455_at	AT5G09980	PROPEP4	0.0518933	0.000412835	9.9233	0006952 // defense response // inferred from electronic annotation///0009753 // response to jasmonic acid stimulus // inferred from expression pattern
245209_at	AT5G12340		0.0506235	0.000138731	27.2166
250264_at	AT5G12890		0.0811085	0.00651926	3.0892	0008152 // metabolic process // inferred from electronic annotation
250292_at	AT5G13220	JAZ10	0.0506235	0.000172104	38.8635	0006351 // transcription, DNA-dependent // inferred from electronic annotation///0006355 // regulation of transcription, DNA-dependent // inferred from electronic annotation///0006952 // defense response // inferred from electronic annotation///0007165 // signal transduction // inferred from reviewed computational analysis///0009414 // response to water deprivation // inferred from reviewed compu…
250287_at	AT5G13330	Rap2.6L	0.0883385	0.00950282	5.74671	0006351 // transcription, DNA-dependent // inferred from electronic annotation///0006355 // regulation of transcription, DNA-dependent // inferred from electronic annotation///0006355 // regulation of transcription, DNA-dependent // inferred from sequence or structural similarity///0009407 // toxin catabolic process // inferred from reviewed computational analysis///0009414 // response to water d…
250293_s_at	AT5G13360///AT5G13370		0.0676089	0.00278419	3.0651	0009733 // response to auxin stimulus // inferred from sequence or structural similarity
245855_at	AT5G13550	SULTR4;1	0.0715094	0.00375178	4.39493	0006810 // transport // inferred from electronic annotation///0006950 // response to stress // inferred from electronic annotation///0008272 // sulfate transport // inferred from electronic annotation///0055085 // transmembrane transport // inferred from electronic annotation
250149_at	AT5G14700		0.077878	0.00557795	5.54128	0009809 // lignin biosynthetic process // inferred from sequence or structural similarity///0044237 // cellular metabolic process // inferred from electronic annotation
246584_at	AT5G14730		0.0506235	0.000126463	4.31036	0009407 // toxin catabolic process // inferred from reviewed computational analysis///0010583 // response to cyclopentenone // inferred from reviewed computational analysis
246595_at	AT5G14780	FDH	0.0794704	0.00618159	4.24952	0008152 // metabolic process // inferred from electronic annotation///0009611 // response to wounding // inferred from direct assay///0046686 // response to cadmium ion // inferred from expression pattern///0055114 // oxidation-reduction process // inferred from electronic annotation
246550_at	AT5G14920		0.06365	0.0019509	3.04926	0009651 // response to salt stress // inferred from mutant phenotype///0009737 // response to abscisic acid stimulus // inferred from mutant phenotype///0009739 // response to gibberellin stimulus // inferred from sequence or structural similarity///0009740 // gibberellic acid mediated signaling pathway // inferred from electronic annotation///2000377 // regulation of reactive oxygen species meta…
250062_at	AT5G17760		0.0676089	0.00276449	4.15769	0009627 // systemic acquired resistance // inferred from reviewed computational analysis///0009697 // salicylic acid biosynthetic process // inferred from reviewed computational analysis
249971_at	AT5G19110		0.0602289	0.000940702	19.6443	0006508 // proteolysis // inferred from electronic annotation
246099_at	AT5G20230	ATBCB	0.0620601	0.00148223	21.9189	0006979 // response to oxidative stress // inferred from reviewed computational analysis///0006979 // response to oxidative stress // traceable author statement///0009611 // response to wounding // inferred from expression pattern///0009611 // response to wounding // inferred from reviewed computational analysis///0009620 // response to fungus // inferred from reviewed computational analysis///00…
246082_at	AT5G20480	EFR	0.0811023	0.00651359	6.49152	0000165 // MAPK cascade // inferred from reviewed computational analysis///0002764 // immune response-regulating signaling pathway // inferred from mutant phenotype///0006468 // protein phosphorylation // inferred from electronic annotation///0006468 // protein phosphorylation // inferred from sequence or structural similarity///0006612 // protein targeting to membrane // inferred from reviewed c…
249903_at	AT5G22690		0.089114	0.00970723	5.11793	0006952 // defense response // inferred from electronic annotation///0006952 // defense response // inferred from sequence or structural similarity///0007165 // signal transduction // inferred from electronic annotation
249791_at	AT5G23810	AAP7	0.0789378	0.00578911	3.5962	0006810 // transport // inferred from electronic annotation///0006865 // amino acid transport // inferred from sequence or structural similarity
249806_at	AT5G23850		0.0623864	0.00154963	6.87129
249773_at	AT5G24140	SQP2	0.0714354	0.00358798	4.2143	0008152 // metabolic process // inferred from electronic annotation///0016126 // sterol biosynthetic process // inferred from reviewed computational analysis///0016126 // sterol biosynthetic process // traceable author statement///0019745 // pentacyclic triterpenoid biosynthetic process // inferred from reviewed computational analysis///0055114 // oxidation-reduction process // inferred from elec…
249732_at	AT5G24420	PGL5	0.06365	0.00193997	10.2765	0005975 // carbohydrate metabolic process // inferred from electronic annotation///0006098 // pentose-phosphate shunt // inferred from electronic annotation
249754_at	AT5G24530	DMR6	0.0556467	0.000670805	4.06061	0000165 // MAPK cascade // inferred from reviewed computational analysis///0001666 // response to hypoxia // inferred from reviewed computational analysis///0006612 // protein targeting to membrane // inferred from reviewed computational analysis///0009595 // detection of biotic stimulus // inferred from reviewed computational analysis///0009617 // response to bacterium // inferred from genetic i…
249747_at	AT5G24600		0.0676089	0.00267785	5.66369
246943_at	AT5G25440		0.06715	0.00253236	6.24993	0002237 // response to molecule of bacterial origin // inferred from reviewed computational analysis///0006468 // protein phosphorylation // inferred from electronic annotation///0006612 // protein targeting to membrane // inferred from reviewed computational analysis///0006944 // cellular membrane fusion // inferred from reviewed computational analysis///0009627 // systemic acquired resistance /…
246821_at	AT5G26920	CBP60G	0.0528449	0.000542461	8.55743	0000165 // MAPK cascade // inferred from reviewed computational analysis///0002237 // response to molecule of bacterial origin // inferred from expression pattern///0002237 // response to molecule of bacterial origin // inferred from reviewed computational analysis///0006355 // regulation of transcription, DNA-dependent // inferred from direct assay///0006612 // protein targeting to membrane // i…
246789_at	AT5G27600	LACS7	0.0506235	9.65022e-05	3.75197	0000278 // mitotic cell cycle // inferred from reviewed computational analysis///0001676 // long-chain fatty acid metabolic process // inferred from direct assay///0001676 // long-chain fatty acid metabolic process // traceable author statement///0006396 // RNA processing // inferred from reviewed computational analysis///0006629 // lipid metabolic process // inferred from electronic annotation//…
255859_at	AT5G34930		0.0725381	0.00399217	3.03917	0006567 // threonine catabolic process // inferred from reviewed computational analysis///0006571 // tyrosine biosynthetic process // inferred from electronic annotation///0006571 // tyrosine biosynthetic process // inferred from sequence or structural similarity///0008652 // cellular amino acid biosynthetic process // inferred from electronic annotation///0009073 // aromatic amino acid family bi…
249675_at	AT5G35940		0.0766829	0.00496209	15.2461
246620_at	AT5G36220	CYP81D1	0.0576802	0.000742081	4.87461	0055114 // oxidation-reduction process // inferred from electronic annotation
249515_at	AT5G38530	TSBtype2	0.0815929	0.0066778	4.34968	0000162 // tryptophan biosynthetic process // inferred from direct assay///0000162 // tryptophan biosynthetic process // inferred from electronic annotation///0000162 // tryptophan biosynthetic process // inferred from sequence or structural similarity///0008152 // metabolic process // inferred from electronic annotation
249527_at	AT5G38710		0.0831582	0.00761617	4.5617	0006537 // glutamate biosynthetic process // inferred from electronic annotation///0006537 // glutamate biosynthetic process // inferred from sequence or structural similarity///0006560 // proline metabolic process // inferred from electronic annotation///0006562 // proline catabolic process // inferred from electronic annotation///0006562 // proline catabolic process // inferred from genetic int…
249346_at	AT5G40780	LTH1	0.0714354	0.00353532	6.37695	0003333 // amino acid transmembrane transport // inferred from mutant phenotype///0006499 // N-terminal protein myristoylation // inferred from reviewed computational analysis///0006612 // protein targeting to membrane // inferred from reviewed computational analysis///0006810 // transport // inferred from electronic annotation///0006820 // anion transport // inferred from reviewed computational …
249264_s_at	AT5G41740///AT5G41750		0.0610978	0.001368	7.62826	0006952 // defense response // inferred from electronic annotation///0006952 // defense response // inferred from sequence or structural similarity///0007165 // signal transduction // inferred from electronic annotation
249237_at	AT5G42050		0.0880592	0.00942592	7.79624	0000165 // MAPK cascade // inferred from reviewed computational analysis///0006499 // N-terminal protein myristoylation // inferred from reviewed computational analysis///0006612 // protein targeting to membrane // inferred from reviewed computational analysis///0007154 // cell communication // inferred from reviewed computational analysis///0009409 // response to cold // inferred from reviewed c…
249197_at	AT5G42380	CML37	0.082572	0.00718365	12.1132	0009693 // ethylene biosynthetic process // inferred from reviewed computational analysis///0010193 // response to ozone // inferred from expression pattern///0010286 // heat acclimation // inferred from reviewed computational analysis///0030968 // endoplasmic reticulum unfolded protein response // inferred from reviewed computational analysis///0052542 // defense response by callose deposition /…
249208_at	AT5G42650	AOS	0.0506235	9.71401e-05	4.14931	0000096 // sulfur amino acid metabolic process // inferred from reviewed computational analysis///0000165 // MAPK cascade // inferred from reviewed computational analysis///0006546 // glycine catabolic process // inferred from reviewed computational analysis///0006569 // tryptophan catabolic process // inferred from reviewed computational analysis///0006612 // protein targeting to membrane // inf…
249188_at	AT5G42830		0.0676089	0.00286755	19.9673
249125_at	AT5G43450		0.0791329	0.0060547	11.6241	0055114 // oxidation-reduction process // inferred from electronic annotation
249101_at	AT5G43580		0.0616353	0.00142137	3.41629	0002213 // defense response to insect // inferred from mutant phenotype///0006508 // proteolysis // inferred from electronic annotation///0006952 // defense response // inferred from sequence or structural similarity///0009611 // response to wounding // inferred from electronic annotation///0009611 // response to wounding // inferred from sequence or structural similarity///0050832 // defense res…
249071_at	AT5G44050		0.0876869	0.0091229	5.4708	0006855 // drug transmembrane transport // inferred from electronic annotation///0055085 // transmembrane transport // inferred from electronic annotation
254521_at	AT5G44820		0.0756077	0.00470471	3.90377
248812_at	AT5G47330		0.0583705	0.00077608	6.24864	0006464 // cellular protein modification process // inferred from electronic annotation///0006865 // amino acid transport // inferred from reviewed computational analysis///0015824 // proline transport // inferred from reviewed computational analysis
248713_at	AT5G48180	NSP5	0.0748533	0.00458678	7.3718	0006635 // fatty acid beta-oxidation // inferred from reviewed computational analysis///0009407 // toxin catabolic process // inferred from reviewed computational analysis///0019762 // glucosinolate catabolic process // inferred from direct assay///0043161 // proteasomal ubiquitin-dependent protein catabolic process // inferred from reviewed computational analysis///0051788 // response to misfold…
248698_at	AT5G48380	BIR1	0.0791329	0.00610982	3.41494	0006468 // protein phosphorylation // inferred from electronic annotation///0009627 // systemic acquired resistance // inferred from reviewed computational analysis///0009697 // salicylic acid biosynthetic process // inferred from reviewed computational analysis///0009863 // salicylic acid mediated signaling pathway // inferred from reviewed computational analysis///0031347 // regulation of defen…
248551_at	AT5G50200	WR3	0.0654801	0.00222501	3.01355	0006612 // protein targeting to membrane // inferred from reviewed computational analysis///0006820 // anion transport // inferred from reviewed computational analysis///0006862 // nucleotide transport // inferred from reviewed computational analysis///0006865 // amino acid transport // inferred from reviewed computational analysis///0006888 // ER to Golgi vesicle-mediated transport // inferred f…
248524_s_at	AT5G50570///AT5G50670		0.0880592	0.00936233	7.01639	0006351 // transcription, DNA-dependent // inferred from electronic annotation///0006355 // regulation of transcription, DNA-dependent // traceable author statement///0048653 // anther development // inferred from mutant phenotype
248460_at	AT5G50915		0.0608984	0.00123728	5.3104	0006351 // transcription, DNA-dependent // inferred from electronic annotation///0006355 // regulation of transcription, DNA-dependent // inferred from electronic annotation///0009739 // response to gibberellin stimulus // inferred from expression pattern
248381_at	AT5G51830		0.0791329	0.00606451	4.97425	0006014 // D-ribose metabolic process // inferred from electronic annotation///0016310 // phosphorylation // inferred from electronic annotation///0046686 // response to cadmium ion // inferred from expression pattern
248392_at	AT5G52050		0.0724706	0.00396948	12.1554	0006855 // drug transmembrane transport // inferred from electronic annotation///0009693 // ethylene biosynthetic process // inferred from reviewed computational analysis///0052542 // defense response by callose deposition // inferred from reviewed computational analysis///0055085 // transmembrane transport // inferred from electronic annotation
248327_at	AT5G52750		0.0791329	0.00592732	5.11412	0000165 // MAPK cascade // inferred from reviewed computational analysis///0009814 // defense response, incompatible interaction // inferred from reviewed computational analysis///0030001 // metal ion transport // inferred from electronic annotation
248322_at	AT5G52760		0.0836846	0.0077393	3.67512	0000165 // MAPK cascade // inferred from reviewed computational analysis///0002237 // response to molecule of bacterial origin // inferred from reviewed computational analysis///0006355 // regulation of transcription, DNA-dependent // inferred from reviewed computational analysis///0006612 // protein targeting to membrane // inferred from reviewed computational analysis///0009581 // detection of …
248330_at	AT5G52810		0.0548241	0.000600678	6.84373	0009627 // systemic acquired resistance // inferred from reviewed computational analysis///0034976 // response to endoplasmic reticulum stress // inferred from reviewed computational analysis
247866_at	AT5G57550	XTR3	0.0606641	0.00118682	20.4497	0005975 // carbohydrate metabolic process // inferred from electronic annotation///0006073 // cellular glucan metabolic process // inferred from electronic annotation///0008152 // metabolic process // inferred from electronic annotation///0009832 // plant-type cell wall biogenesis // inferred from sequence or structural similarity
247925_at	AT5G57560	TCH4	0.0785345	0.00569794	5.24499	0005975 // carbohydrate metabolic process // inferred from electronic annotation///0006073 // cellular glucan metabolic process // inferred from electronic annotation///0008152 // metabolic process // inferred from electronic annotation///0009408 // response to heat // inferred from expression pattern///0009409 // response to cold // inferred from expression pattern///0009611 // response to wound…
247718_at	AT5G59310	LTP4	0.0839557	0.00795657	73.8708	0006810 // transport // inferred from electronic annotation///0006869 // lipid transport // inferred from electronic annotation///0006869 // lipid transport // traceable author statement///0009409 // response to cold // inferred from reviewed computational analysis///0009414 // response to water deprivation // inferred from expression pattern///0009414 // response to water deprivation // inferred…
247717_at	AT5G59320	LTP3	0.0610978	0.00136031	22.8757	0006810 // transport // inferred from electronic annotation///0006869 // lipid transport // inferred from electronic annotation///0009409 // response to cold // inferred from reviewed computational analysis///0009414 // response to water deprivation // inferred from expression pattern///0009414 // response to water deprivation // inferred from reviewed computational analysis///0009737 // response…
247704_at	AT5G59510	RTFL5	0.0592021	0.000826817	27.9291	0015824 // proline transport // inferred from reviewed computational analysis///0048367 // shoot system development // inferred from sequence or structural similarity
247655_at	AT5G59820	RHL41	0.0717801	0.00384936	15.304	0006351 // transcription, DNA-dependent // inferred from electronic annotation///0006355 // regulation of transcription, DNA-dependent // inferred from electronic annotation///0006979 // response to oxidative stress // inferred from expression pattern///0006979 // response to oxidative stress // inferred from mutant phenotype///0006979 // response to oxidative stress // inferred from reviewed com…
247435_at	AT5G62480	ATGSTU9	0.0745464	0.00442161	12.3088	0009407 // toxin catabolic process // inferred from reviewed computational analysis///0009407 // toxin catabolic process // traceable author statement///0009636 // response to toxic substance // inferred from electronic annotation///0010583 // response to cyclopentenone // inferred from reviewed computational analysis
247360_at	AT5G63450	CYP94B1	0.0609841	0.00129034	7.03634	0009611 // response to wounding // inferred from expression pattern///0009694 // jasmonic acid metabolic process // inferred from reviewed computational analysis///0009753 // response to jasmonic acid stimulus // inferred from reviewed computational analysis///0055114 // oxidation-reduction process // inferred from electronic annotation
247175_at	AT5G65280	GCL1	0.0791898	0.00612799	3.73625
247193_at	AT5G65380		0.0729766	0.0040855	4.36004	0006855 // drug transmembrane transport // inferred from electronic annotation///0009835 // fruit ripening // inferred from sequence or structural similarity///0055085 // transmembrane transport // inferred from electronic annotation
247013_at	AT5G67480	BT4	0.0676089	0.00273683	7.6244	0006355 // regulation of transcription, DNA-dependent // inferred from electronic annotation///0006355 // regulation of transcription, DNA-dependent // traceable author statement///0009611 // response to wounding // inferred from expression pattern///0009651 // response to salt stress // inferred from expression pattern///0009733 // response to auxin stimulus // inferred from expression pattern//…
