# Supplementary material for: Heterologous Overexpression of Poplar SnRK2 Genes Enhanced Salt Stress Tolerance in Arabidopsis thaliana
Source: Front Plant Sci. 2016 May 9;7:612. doi: 10.3389/fpls.2016.00612 (PMC4860416; doi:10.3389/fpls.2016.00612)
Supplement: Table S3 — Downregulated 120 genes in the wild type by the salt treatment (FC>3, p < 0.01). [file Table3.XLSX]

## Sheet: Table S3
Table S3. Downregulated 120 genes in the wild type by the salt treatment (FC>3, p<0.01)
Probe Set ID	AGI	Gene Symbol	Corrected p-value	p-value	Fold Change	Gene Ontology Biological Process
261536_at	AT1G01790	KEA1	0.0712002	0.00347711	5.39572	0006810 // transport // inferred from electronic annotation///0006811 // ion transport // inferred from electronic annotation///0006812 // cation transport // inferred from electronic annotation///0006813 // potassium ion transport // inferred from electronic annotation///0055085 // transmembrane transport // inferred from electronic annotation
260914_at	AT1G02640	BXL2	0.0857865	0.00842774	4.9557	0005975 // carbohydrate metabolic process // inferred from electronic annotation///0008152 // metabolic process // inferred from electronic annotation///0046685 // response to arsenic-containing substance // inferred from reviewed computational analysis
264597_at	AT1G04620		0.0772378	0.00540822	3.48729	0015994 // chlorophyll metabolic process // inferred from direct assay///0033354 // chlorophyll cycle // inferred from direct assay///0055114 // oxidation-reduction process // inferred from electronic annotation
261388_at	AT1G05385	LPA19	0.0836846	0.0077923	4.73303	0006098 // pentose-phosphate shunt // inferred from reviewed computational analysis///0010207 // photosystem II assembly // inferred from mutant phenotype
260831_at	AT1G06830		0.0816268	0.00672183	7.01116	0045454 // cell redox homeostasis // inferred from electronic annotation///0048653 // anther development // inferred from reviewed computational analysis
256060_at	AT1G07050		0.0735481	0.00421806	6.94671	0007623 // circadian rhythm // inferred from reviewed computational analysis
261084_at	AT1G07440		0.0767544	0.00522718	5.49148	0000023 // maltose metabolic process // inferred from reviewed computational analysis///0006098 // pentose-phosphate shunt // inferred from reviewed computational analysis///0008152 // metabolic process // inferred from electronic annotation///0019252 // starch biosynthetic process // inferred from reviewed computational analysis///0043085 // positive regulation of catalytic activity // inferred …
264466_at	AT1G10380		0.0638351	0.00197657	3.11603
262830_at	AT1G14700	PAP3	0.0712002	0.00347676	7.22844
262598_at	AT1G15260		0.0896117	0.00991434	5.63439
262539_at	AT1G17200		0.0757863	0.0047789	4.36175	0006949 // syncytium formation // inferred from reviewed computational analysis///0080167 // response to karrikin // inferred from expression pattern
259481_at	AT1G18970	GLP4	0.0735481	0.00421128	3.90548	0000041 // transition metal ion transport // inferred from reviewed computational analysis///0006826 // iron ion transport // inferred from reviewed computational analysis///0010106 // cellular response to iron ion starvation // inferred from reviewed computational analysis///0010167 // response to nitrate // inferred from reviewed computational analysis///0015706 // nitrate transport // inferred…
260876_at	AT1G21460		0.0518933	0.000419803	3.28126	0006810 // transport // inferred from electronic annotation///0008643 // carbohydrate transport // inferred from electronic annotation
262986_at	AT1G23390		0.0574553	0.000717231	4.87763
264978_at	AT1G27120		0.0872967	0.00901579	3.02796	0006486 // protein glycosylation // inferred from electronic annotation
262733_s_at	AT1G28660///AT1G28670	ARAB-1	0.0602289	0.00112924	3.17129	0006629 // lipid metabolic process // inferred from electronic annotation///0016042 // lipid catabolic process // inferred from electronic annotation
260696_at	AT1G32520		0.06365	0.00176472	3.25075
261308_at	AT1G48480	RKL1	0.0739348	0.00432991	3.0402	0006468 // protein phosphorylation // inferred from electronic annotation///0006468 // protein phosphorylation // inferred from sequence or structural similarity///0007169 // transmembrane receptor protein tyrosine kinase signaling pathway // inferred from sequence or structural similarity///0010075 // regulation of meristem growth // inferred from reviewed computational analysis///0016310 // pho…
261607_at	AT1G49660	AtCXE5	0.06365	0.00175151	3.07276	0008152 // metabolic process // inferred from electronic annotation///0016126 // sterol biosynthetic process // inferred from reviewed computational analysis///0042546 // cell wall biogenesis // inferred from reviewed computational analysis
260603_at	AT1G55960		0.0630147	0.00162748	3.73544	0010264 // myo-inositol hexakisphosphate biosynthetic process // inferred from reviewed computational analysis
264931_at	AT1G60590		0.0506235	0.000281059	5.8099	0005975 // carbohydrate metabolic process // inferred from electronic annotation///0005975 // carbohydrate metabolic process // inferred from sequence or structural similarity///0008152 // metabolic process // inferred from electronic annotation///0016556 // mRNA modification // inferred from reviewed computational analysis
265032_at	AT1G61580	RPL3B	0.064916	0.00215822	3.69395	0006412 // translation // inferred from electronic annotation///0006412 // translation // inferred from sequence or structural similarity///0009165 // nucleotide biosynthetic process // inferred from reviewed computational analysis///0052541 // plant-type cell wall cellulose metabolic process // inferred from reviewed computational analysis///0052546 // cell wall pectin metabolic process // infer…
265121_at	AT1G62560	FMO GS-OX3	0.0670578	0.00250198	3.47471	0009684 // indoleacetic acid biosynthetic process // inferred from reviewed computational analysis///0019344 // cysteine biosynthetic process // inferred from reviewed computational analysis///0019761 // glucosinolate biosynthetic process // inferred from mutant phenotype///0019761 // glucosinolate biosynthetic process // inferred from reviewed computational analysis///0055114 // oxidation-reduct…
259766_at	AT1G64360		0.0833349	0.00765889	3.62276	0006979 // response to oxidative stress // inferred from mutant phenotype
259999_at	AT1G68080		0.0865041	0.00866088	3.19982	0055114 // oxidation-reduction process // inferred from electronic annotation
260364_at	AT1G70560	TAA1	0.0717335	0.00381031	3.7648	0009641 // shade avoidance // inferred from mutant phenotype///0009684 // indoleacetic acid biosynthetic process // inferred from mutant phenotype///0009723 // response to ethylene stimulus // inferred from mutant phenotype///0009793 // embryo development ending in seed dormancy // inferred from genetic interaction///0009851 // auxin biosynthetic process // inferred from electronic annotation///0…
260167_at	AT1G71970		0.0602289	0.00109855	3.78871
259842_at	AT1G73600///AT1G73602	CPuORF32	0.0824196	0.00699165	30.6733	0000023 // maltose metabolic process // inferred from reviewed computational analysis///0006629 // lipid metabolic process // inferred from electronic annotation///0006656 // phosphatidylcholine biosynthetic process // inferred from electronic annotation///0008152 // metabolic process // inferred from electronic annotation///0008654 // phospholipid biosynthetic process // inferred from electronic…
262218_at	AT1G74770		0.0776827	0.00552677	4.909	0006826 // iron ion transport // inferred from reviewed computational analysis///0010043 // response to zinc ion // inferred from reviewed computational analysis///0010106 // cellular response to iron ion starvation // inferred from reviewed computational analysis///0010167 // response to nitrate // inferred from reviewed computational analysis///0015706 // nitrate transport // inferred from revi…
261782_at	AT1G76110		0.0506235	0.000280367	5.18461	0000165 // MAPK cascade // inferred from reviewed computational analysis///0006333 // chromatin assembly or disassembly // inferred from reviewed computational analysis///0006351 // transcription, DNA-dependent // inferred from electronic annotation///0006355 // regulation of transcription, DNA-dependent // inferred from reviewed computational analysis///0006355 // regulation of transcription, DN…
264482_at	AT1G77210	STP14	0.0506235	0.000124529	4.04775	0006810 // transport // inferred from electronic annotation///0008643 // carbohydrate transport // inferred from electronic annotation///0015757 // galactose transport // inferred from genetic interaction///0055085 // transmembrane transport // inferred from electronic annotation
262162_at	AT1G78020		0.0678747	0.00290062	8.0223
263126_at	AT1G78460		0.0745464	0.00443678	3.93347
264100_at	AT1G78970	LUP1	0.0506235	0.0002674	3.20705	0016126 // sterol biosynthetic process // inferred from reviewed computational analysis///0019745 // pentacyclic triterpenoid biosynthetic process // inferred from genetic interaction///0019745 // pentacyclic triterpenoid biosynthetic process // inferred from sequence or structural similarity///0019745 // pentacyclic triterpenoid biosynthetic process // inferred from reviewed computational analys…
266352_at	AT2G01610		0.0697708	0.00323503	3.23955	0043086 // negative regulation of catalytic activity // inferred from electronic annotation
266141_at	AT2G02120	PDF2.1	0.081517	0.00658961	3.34746	0006952 // defense response // inferred from electronic annotation///0006952 // defense response // inferred from sequence or structural similarity///0031640 // killing of cells of other organism // inferred from electronic annotation///0050832 // defense response to fungus // inferred from electronic annotation
266745_at	AT2G02950	PKS1	0.0855532	0.00833137	3.23499	0009585 // red, far-red light phototransduction // inferred from mutant phenotype///0009637 // response to blue light // inferred from reviewed computational analysis///0009638 // phototropism // inferred from genetic interaction///0009958 // positive gravitropism // inferred from mutant phenotype///0010017 // red or far-red light signaling pathway // inferred from mutant phenotype///0010114 // r…
263322_at	AT2G04270	RNEE/G	0.0745464	0.00444064	3.43741	0006396 // RNA processing // inferred from electronic annotation///0009658 // chloroplast organization // inferred from mutant phenotype///0009902 // chloroplast relocation // inferred from reviewed computational analysis///0010027 // thylakoid membrane organization // inferred from reviewed computational analysis///0010239 // chloroplast mRNA processing // inferred from mutant phenotype///001655…
265478_at	AT2G15890	MEE14	0.0680515	0.00291298	3.4248	0009793 // embryo development ending in seed dormancy // inferred from mutant phenotype///0050832 // defense response to fungus // inferred from expression pattern
263098_at	AT2G16005		0.0895674	0.00987308	6.85037
265342_at	AT2G18300		0.0895674	0.0098746	12.7801	0006351 // transcription, DNA-dependent // inferred from electronic annotation///0006355 // regulation of transcription, DNA-dependent // traceable author statement///0009299 // mRNA transcription // inferred from direct assay///0009725 // response to hormone stimulus // inferred from mutant phenotype///0009735 // response to cytokinin stimulus // inferred from expression pattern///0009826 // uni…
265929_s_at	AT2G18560///AT2G18570		0.082572	0.0073432	4.20145	0008152 // metabolic process // inferred from electronic annotation
264025_at	AT2G21050	LAX2	0.0680515	0.0029256	3.33941	0006810 // transport // inferred from electronic annotation///0006865 // amino acid transport // inferred from sequence or structural similarity///0006865 // amino acid transport // inferred from reviewed computational analysis///0009624 // response to nematode // inferred from expression pattern///0009624 // response to nematode // inferred from reviewed computational analysis///0009734 // auxin…
265545_at	AT2G28250	NCRK	0.0867614	0.00876357	4.31647	0006468 // protein phosphorylation // inferred from electronic annotation///0007155 // cell adhesion // inferred from reviewed computational analysis///0010014 // meristem initiation // inferred from reviewed computational analysis///0010089 // xylem development // inferred from direct assay///0010089 // xylem development // inferred from reviewed computational analysis///0010090 // trichome morp…
263951_at	AT2G35960	NHL12	0.082572	0.00725347	5.40299	0000023 // maltose metabolic process // inferred from reviewed computational analysis///0019252 // starch biosynthetic process // inferred from reviewed computational analysis
257381_at	AT2G37950		0.0820862	0.00691338	3.43323	0009555 // pollen development // inferred from mutant phenotype///0009741 // response to brassinosteroid stimulus // inferred from reviewed computational analysis
267138_s_at	AT2G38210///AT2G38230	PDX1.1	0.0719118	0.00386312	4.54861	0008152 // metabolic process // inferred from electronic annotation///0008615 // pyridoxine biosynthetic process // inferred from electronic annotation///0009228 // thiamine biosynthetic process // inferred from electronic annotation///0009723 // response to ethylene stimulus // inferred from sequence or structural similarity///0042819 // vitamin B6 biosynthetic process // inferred from genetic i…
255822_at	AT2G40610	ATEXPA8	0.0506235	0.000137723	3.56957	0006949 // syncytium formation // inferred from expression pattern///0009664 // plant-type cell wall organization // inferred from electronic annotation///0009826 // unidimensional cell growth // inferred from sequence or structural similarity///0009826 // unidimensional cell growth // non-traceable author statement///0009828 // plant-type cell wall loosening // inferred from sequence or structur…
266078_at	AT2G40670	ARR16	0.06365	0.0018921	3.02413	0000160 // phosphorelay signal transduction system // inferred from electronic annotation///0006351 // transcription, DNA-dependent // inferred from electronic annotation///0006355 // regulation of transcription, DNA-dependent // inferred from electronic annotation///0006355 // regulation of transcription, DNA-dependent // traceable author statement///0007623 // circadian rhythm // inferred from …
266324_at	AT2G46710		0.0767544	0.00521637	3.32597	0007165 // signal transduction // inferred from electronic annotation///0007275 // multicellular organismal development // inferred from electronic annotation///0009664 // plant-type cell wall organization // inferred from mutant phenotype///0009926 // auxin polar transport // inferred from reviewed computational analysis///0010218 // response to far red light // inferred from reviewed computatio…
258468_at	AT3G06070		0.0610978	0.00132804	9.38682
258402_at	AT3G15450		0.0845115	0.00809318	3.10922	0009744 // response to sucrose stimulus // inferred from reviewed computational analysis///0009750 // response to fructose stimulus // inferred from reviewed computational analysis
257294_at	AT3G15570		0.0896117	0.00991944	3.33957	0000023 // maltose metabolic process // inferred from reviewed computational analysis///0009416 // response to light stimulus // inferred from electronic annotation///0009416 // response to light stimulus // inferred from sequence or structural similarity///0019252 // starch biosynthetic process // inferred from reviewed computational analysis
258419_at	AT3G16670		0.0748533	0.00462123	8.14777	0006979 // response to oxidative stress // inferred from mutant phenotype
257750_at	AT3G18800		0.0830075	0.00753913	3.70125
256792_at	AT3G22150		0.0838661	0.00783591	4.3949	0016556 // mRNA modification // inferred from reviewed computational analysis
252605_s_at	AT3G45070///AT3G45080		0.0876869	0.00913919	9.35532	0009812 // flavonoid metabolic process // inferred from direct assay
252612_at	AT3G45160		0.0836846	0.007743	7.50338	0019761 // glucosinolate biosynthetic process // inferred from reviewed computational analysis
252411_at	AT3G47430	PEX11B	0.0548241	0.000618209	3.5577	0006098 // pentose-phosphate shunt // inferred from reviewed computational analysis///0007031 // peroxisome organization // inferred from mutant phenotype///0016559 // peroxisome fission // inferred from electronic annotation///0016559 // peroxisome fission // inferred from mutant phenotype///0016559 // peroxisome fission // inferred from sequence or structural similarity///0044375 // regulation …
252250_at	AT3G49790		0.0683769	0.00301605	4.3127	0009744 // response to sucrose stimulus // inferred from reviewed computational analysis///0009750 // response to fructose stimulus // inferred from reviewed computational analysis
252202_at	AT3G50300		0.0683769	0.00298835	3.34626	0000041 // transition metal ion transport // inferred from reviewed computational analysis
252183_at	AT3G50740	UGT72E1	0.0654493	0.00218428	3.18334	0006520 // cellular amino acid metabolic process // inferred from reviewed computational analysis///0006569 // tryptophan catabolic process // inferred from reviewed computational analysis///0008152 // metabolic process // inferred from electronic annotation///0009636 // response to toxic substance // inferred from electronic annotation///0009684 // indoleacetic acid biosynthetic process // infer…
252040_at	AT3G52060		0.0647065	0.0021188	3.62446
251969_at	AT3G53130	LUT1	0.0816268	0.0067458	3.18582	0006636 // unsaturated fatty acid biosynthetic process // inferred from reviewed computational analysis///0009965 // leaf morphogenesis // inferred from reviewed computational analysis///0010103 // stomatal complex morphogenesis // inferred from reviewed computational analysis///0015995 // chlorophyll biosynthetic process // inferred from reviewed computational analysis///0016117 // carotenoid bi…
251982_at	AT3G53190		0.0727118	0.00403063	4.28626	0045490 // pectin catabolic process // inferred from electronic annotation
251720_at	AT3G56160		0.0712729	0.00349515	4.74154	0006810 // transport // inferred from electronic annotation///0006814 // sodium ion transport // inferred from electronic annotation///0035725 // sodium ion transmembrane transport // inferred from electronic annotation
251677_at	AT3G56980	BHLH039	0.077878	0.00560058	14.4871	0006351 // transcription, DNA-dependent // inferred from electronic annotation///0006355 // regulation of transcription, DNA-dependent // traceable author statement///0010106 // cellular response to iron ion starvation // inferred from expression pattern///0055072 // iron ion homeostasis // inferred from genetic interaction
251461_at	AT3G59780		0.082572	0.00733252	4.2941	0000023 // maltose metabolic process // inferred from reviewed computational analysis///0006098 // pentose-phosphate shunt // inferred from reviewed computational analysis///0016117 // carotenoid biosynthetic process // inferred from reviewed computational analysis///0019252 // starch biosynthetic process // inferred from reviewed computational analysis///0019288 // isopentenyl diphosphate biosyn…
251356_at	AT3G61060	AtPP2-A13	0.0506235	0.000130171	8.41072	0009611 // response to wounding // inferred from expression pattern///0009744 // response to sucrose stimulus // inferred from reviewed computational analysis///0009750 // response to fructose stimulus // inferred from reviewed computational analysis///0016567 // protein ubiquitination // inferred from electronic annotation
251353_at	AT3G61080		0.0876869	0.00920269	3.07044	0015996 // chlorophyll catabolic process // inferred from reviewed computational analysis///0016310 // phosphorylation // inferred from electronic annotation
255310_at	AT4G04955	ATALN	0.0640639	0.00204214	5.65431	0000256 // allantoin catabolic process // inferred from electronic annotation///0006995 // cellular response to nitrogen starvation // inferred from expression pattern///0010136 // ureide catabolic process // inferred from mutant phenotype
254746_at	AT4G12980		0.0882947	0.00949248	7.98072	0007275 // multicellular organismal development // inferred from sequence or structural similarity
254803_at	AT4G13100		0.06365	0.00191654	3.0141
245576_at	AT4G14770	TCX2	0.089114	0.0097111	3.35852	0006261 // DNA-dependent DNA replication // inferred from reviewed computational analysis///0006355 // regulation of transcription, DNA-dependent // traceable author statement///0007275 // multicellular organismal development // inferred from electronic annotation///0010075 // regulation of meristem growth // inferred from reviewed computational analysis///0010103 // stomatal complex morphogenesi…
245546_at	AT4G15290	ATCSLB05	0.0610978	0.00137393	4.16015	0000271 // polysaccharide biosynthetic process // inferred from sequence or structural similarity///0030244 // cellulose biosynthetic process // inferred from electronic annotation///0048767 // root hair elongation // inferred from mutant phenotype
245399_at	AT4G17340	TIP2;2	0.0857362	0.00839146	5.75858	0006810 // transport // inferred from electronic annotation///0006810 // transport // inferred from sequence or structural similarity///0006833 // water transport // inferred from electronic annotation///0010167 // response to nitrate // inferred from reviewed computational analysis///0015706 // nitrate transport // inferred from reviewed computational analysis///0055085 // transmembrane transpor…
245362_at	AT4G17460	HAT1	0.0789934	0.00584046	3.56941	0003006 // developmental process involved in reproduction // inferred from genetic interaction///0006351 // transcription, DNA-dependent // inferred from electronic annotation///0006355 // regulation of transcription, DNA-dependent // inferred from electronic annotation///0006355 // regulation of transcription, DNA-dependent // inferred from sequence or structural similarity///0010582 // floral m…
254606_at	AT4G19030	NLM1	0.0609841	0.00125826	6.346	0006810 // transport // inferred from electronic annotation///0006810 // transport // inferred from sequence or structural similarity///0006833 // water transport // inferred from electronic annotation///0015700 // arsenite transport // inferred from direct assay///0031347 // regulation of defense response // inferred from mutant phenotype///0046685 // response to arsenic-containing substance // …
254496_at	AT4G20070	ATAAH	0.0611285	0.00138601	4.09776	0006144 // purine nucleobase metabolic process // inferred from electronic annotation///0006508 // proteolysis // inferred from electronic annotation///0006508 // proteolysis // inferred from sequence or structural similarity///0008152 // metabolic process // inferred from electronic annotation///0010136 // ureide catabolic process // inferred from mutant phenotype///0015996 // chlorophyll catabo…
254371_at	AT4G21760	BGLU47	0.06365	0.001803	3.49252	0005975 // carbohydrate metabolic process // inferred from electronic annotation///0008152 // metabolic process // inferred from electronic annotation
253815_at	AT4G28250	ATEXPB3	0.0865051	0.00866726	8.71484	0006949 // syncytium formation // inferred from expression pattern///0009664 // plant-type cell wall organization // inferred from sequence or structural similarity///0009826 // unidimensional cell growth // inferred from sequence or structural similarity///0009826 // unidimensional cell growth // non-traceable author statement///0009828 // plant-type cell wall loosening // inferred from sequence…
253806_at	AT4G28270	RMA2	0.06365	0.0019232	4.28604	0016567 // protein ubiquitination // inferred from electronic annotation
253753_at	AT4G29030		0.0717705	0.00383065	3.19042	0010103 // stomatal complex morphogenesis // inferred from reviewed computational analysis
253582_at	AT4G30670		0.0608602	0.00121713	6.52311	0006826 // iron ion transport // inferred from reviewed computational analysis///0010054 // trichoblast differentiation // inferred from reviewed computational analysis///0010106 // cellular response to iron ion starvation // inferred from reviewed computational analysis///0010167 // response to nitrate // inferred from reviewed computational analysis///0015706 // nitrate transport // inferred fr…
253483_at	AT4G31910		0.0610978	0.00132821	5.31598	0006826 // iron ion transport // inferred from reviewed computational analysis///0010087 // phloem or xylem histogenesis // inferred from mutant phenotype///0010106 // cellular response to iron ion starvation // inferred from reviewed computational analysis///0010167 // response to nitrate // inferred from reviewed computational analysis///0015706 // nitrate transport // inferred from reviewed co…
253278_at	AT4G34220		0.0857865	0.00846889	5.06523	0006468 // protein phosphorylation // inferred from electronic annotation///0006468 // protein phosphorylation // inferred from sequence or structural similarity///0007169 // transmembrane receptor protein tyrosine kinase signaling pathway // inferred from sequence or structural similarity///0016310 // phosphorylation // inferred from electronic annotation
253233_at	AT4G34290		0.0893528	0.00979685	4.16164
253243_at	AT4G34560		0.0518933	0.000484668	3.29216
253218_at	AT4G34980	SLP2	0.081517	0.00659882	3.70606	0000096 // sulfur amino acid metabolic process // inferred from reviewed computational analysis///0000272 // polysaccharide catabolic process // inferred from reviewed computational analysis///0005982 // starch metabolic process // inferred from reviewed computational analysis///0006508 // proteolysis // inferred from electronic annotation///0006508 // proteolysis // inferred from sequence or str…
253061_at	AT4G37610	BT5	0.0767544	0.0049986	4.94915	0006355 // regulation of transcription, DNA-dependent // inferred from electronic annotation///0006355 // regulation of transcription, DNA-dependent // traceable author statement///0009409 // response to cold // inferred from expression pattern///0009733 // response to auxin stimulus // inferred from expression pattern///0009751 // response to salicylic acid stimulus // inferred from expression p…
250891_at	AT5G04530	KCS19	0.0727118	0.0040316	3.29345	0006633 // fatty acid biosynthetic process // inferred from electronic annotation///0008152 // metabolic process // inferred from electronic annotation///0008610 // lipid biosynthetic process // inferred from electronic annotation///0009409 // response to cold // inferred from expression pattern///0009416 // response to light stimulus // inferred from expression pattern
250820_at	AT5G05160		0.0506235	0.000207771	3.20618	0006468 // protein phosphorylation // inferred from electronic annotation///0006468 // protein phosphorylation // inferred from sequence or structural similarity///0007169 // transmembrane receptor protein tyrosine kinase signaling pathway // inferred from sequence or structural similarity///0010089 // xylem development // inferred from reviewed computational analysis///0016310 // phosphorylation…
250794_at	AT5G05270		0.0767544	0.00523195	3.56746	0009718 // anthocyanin-containing compound biosynthetic process // inferred from reviewed computational analysis///0009744 // response to sucrose stimulus // inferred from reviewed computational analysis///0009813 // flavonoid biosynthetic process // inferred from electronic annotation///0009813 // flavonoid biosynthetic process // inferred from reviewed computational analysis///0010224 // respon…
250503_at	AT5G09820		0.0748533	0.00460982	3.1415
245906_at	AT5G11070		0.0506235	0.000178515	3.47173	0009741 // response to brassinosteroid stimulus // inferred from reviewed computational analysis
246522_at	AT5G15830	AtbZIP3	0.077084	0.00536863	4.35849	0006355 // regulation of transcription, DNA-dependent // inferred from electronic annotation///0006355 // regulation of transcription, DNA-dependent // inferred from sequence or structural similarity///0009612 // response to mechanical stimulus // inferred from reviewed computational analysis///0019722 // calcium-mediated signaling // inferred from reviewed computational analysis
250099_at	AT5G17300	RVE1	0.0610978	0.00135206	3.10924	0006355 // regulation of transcription, DNA-dependent // inferred from reviewed computational analysis///0006355 // regulation of transcription, DNA-dependent // traceable author statement///0007623 // circadian rhythm // inferred from expression pattern///0007623 // circadian rhythm // inferred from reviewed computational analysis///0009651 // response to salt stress // inferred from reviewed co…
250007_at	AT5G18670	BMY3	0.0576678	0.000730498	3.90313	0000272 // polysaccharide catabolic process // inferred from electronic annotation///0005975 // carbohydrate metabolic process // inferred from electronic annotation
246142_at	AT5G19970		0.0506235	0.000161915	4.87965	0006826 // iron ion transport // inferred from reviewed computational analysis///0010106 // cellular response to iron ion starvation // inferred from reviewed computational analysis///0010167 // response to nitrate // inferred from reviewed computational analysis///0015706 // nitrate transport // inferred from reviewed computational analysis
246947_at	AT5G25120	CYP71B11	0.0506235	0.000143106	3.04087	0055114 // oxidation-reduction process // inferred from electronic annotation
246917_at	AT5G25280		0.0506235	0.000369384	3.16416
249588_at	AT5G37790		0.0602289	0.00114221	3.91436	0006468 // protein phosphorylation // inferred from electronic annotation///0016310 // phosphorylation // inferred from electronic annotation
249599_at	AT5G37990		0.0838668	0.00788764	3.78294	0000041 // transition metal ion transport // inferred from reviewed computational analysis///0032259 // methylation // inferred from electronic annotation
249366_at	AT5G40610		0.0602289	0.00112025	4.68501	0005975 // carbohydrate metabolic process // inferred from electronic annotation///0006072 // glycerol-3-phosphate metabolic process // inferred from sequence or structural similarity///0006629 // lipid metabolic process // inferred from electronic annotation///0006650 // glycerophospholipid metabolic process // inferred from electronic annotation///0008654 // phospholipid biosynthetic process //…
248975_at	AT5G45040		0.0767544	0.00503653	4.15576	0015979 // photosynthesis // inferred from electronic annotation///0055114 // oxidation-reduction process // inferred from electronic annotation
248759_at	AT5G47610		0.0872761	0.00896735	4.51894	0016567 // protein ubiquitination // inferred from electronic annotation
248753_at	AT5G47630	mtACP3	0.0876869	0.00918469	3.55665	0006629 // lipid metabolic process // inferred from electronic annotation///0006631 // fatty acid metabolic process // inferred from electronic annotation///0006633 // fatty acid biosynthetic process // inferred from electronic annotation///0006633 // fatty acid biosynthetic process // inferred from sequence or structural similarity///0010267 // production of ta-siRNAs involved in RNA interferenc…
248710_at	AT5G48480		0.0747548	0.00455616	3.09396
248684_at	AT5G48485	DIR1	0.0506235	0.000367705	5.02435	0006810 // transport // inferred from electronic annotation///0006869 // lipid transport // inferred from sequence or structural similarity///0006952 // defense response // inferred from electronic annotation///0009862 // systemic acquired resistance, salicylic acid mediated signaling pathway // inferred from mutant phenotype
248347_at	AT5G52250		0.0789934	0.00584091	3.14371	0009744 // response to sucrose stimulus // inferred from reviewed computational analysis///0009813 // flavonoid biosynthetic process // inferred from reviewed computational analysis///0009908 // flower development // inferred from electronic annotation///0010114 // response to red light // inferred from expression pattern///0010218 // response to far red light // inferred from expression pattern/…
248252_at	AT5G53250	AGP22	0.0676089	0.00267191	10.8158	0006826 // iron ion transport // inferred from reviewed computational analysis///0010054 // trichoblast differentiation // inferred from reviewed computational analysis///0010106 // cellular response to iron ion starvation // inferred from reviewed computational analysis///0010167 // response to nitrate // inferred from reviewed computational analysis///0015706 // nitrate transport // inferred fr…
248140_at	AT5G54980		0.0870962	0.00884528	3.34954	0045333 // cellular respiration // not recorded
247954_at	AT5G56870	BGAL4	0.0683769	0.0030028	6.95462	0005975 // carbohydrate metabolic process // inferred from electronic annotation///0008152 // metabolic process // inferred from electronic annotation
247754_at	AT5G59080		0.0518933	0.000421043	7.70697	0006979 // response to oxidative stress // inferred from mutant phenotype
247638_at	AT5G60490	FLA12	0.0791329	0.00598649	3.09178	0009834 // secondary cell wall biogenesis // inferred from mutant phenotype
247524_at	AT5G61440	ACHT5	0.0602289	0.000977443	4.63085	0006662 // glycerol ether metabolic process // inferred from electronic annotation///0045454 // cell redox homeostasis // inferred from electronic annotation///0055114 // oxidation-reduction process // inferred from electronic annotation
247297_at	AT5G64100		0.0506235	0.000142828	3.59206	0006979 // response to oxidative stress // inferred from electronic annotation///0010167 // response to nitrate // inferred from reviewed computational analysis///0015698 // inorganic anion transport // inferred from reviewed computational analysis///0015706 // nitrate transport // inferred from reviewed computational analysis///0042744 // hydrogen peroxide catabolic process // inferred from elec…
247288_at	AT5G64330	NPH3	0.0756745	0.0047246	3.29118	0000271 // polysaccharide biosynthetic process // inferred from reviewed computational analysis///0007165 // signal transduction // inferred from electronic annotation///0009416 // response to light stimulus // inferred from sequence or structural similarity///0009637 // response to blue light // inferred from reviewed computational analysis///0009638 // phototropism // inferred from mutant pheno…
247182_at	AT5G65410	HB25	0.0767544	0.00511758	3.46983	0006351 // transcription, DNA-dependent // inferred from electronic annotation///0006355 // regulation of transcription, DNA-dependent // inferred from electronic annotation
246998_at	AT5G67370		0.082572	0.00733478	3.97477
