# Supplementary material for: Heterologous Overexpression of Poplar SnRK2 Genes Enhanced Salt Stress Tolerance in Arabidopsis thaliana
Source: Front Plant Sci. 2016 May 9;7:612. doi: 10.3389/fpls.2016.00612 (PMC4860416; doi:10.3389/fpls.2016.00612)
Supplement: Table S4 — Upregulated 631 genes in the PtSnRK2.7 overexpressor by the salt treatment (FC>3, p < 0.01). [file Table4.XLSX]

## Sheet: Table S4
Table S4. Upregulated 631 genes in the PtSnRK2.7 overexpressor by the salt treatment (FC>3, p<0.01)
Probe Set ID	AGI	Gene Symbol	Corrected p-value	p-value	Fold Change	Gene Ontology Biological Process
259426_at	AT1G01470	LEA14	0.00263763	1.40605e-05	3.20789	0009269 // response to desiccation // inferred from electronic annotation///0009269 // response to desiccation // inferred from sequence or structural similarity///0009409 // response to cold // inferred from reviewed computational analysis///0009414 // response to water deprivation // inferred from reviewed computational analysis///0009611 // response to wounding // inferred from expression patt…
259428_at	AT1G01560	ATMPK11	0.024261	0.00636254	7.60498	0000165 // MAPK cascade // inferred from reviewed computational analysis///0006355 // regulation of transcription, DNA-dependent // inferred from reviewed computational analysis///0006468 // protein phosphorylation // inferred from electronic annotation///0006612 // protein targeting to membrane // inferred from reviewed computational analysis///0007154 // cell communication // inferred from revi…
261564_at	AT1G01720	ATAF1	0.0280248	0.00808734	5.61554	0006351 // transcription, DNA-dependent // inferred from electronic annotation///0006355 // regulation of transcription, DNA-dependent // inferred from electronic annotation///0007275 // multicellular organismal development // inferred from sequence or structural similarity///0009414 // response to water deprivation // inferred from reviewed computational analysis///0009611 // response to woundin…
264146_at	AT1G02205	CER1	0.00344654	8.77698e-05	4.56514	0006633 // fatty acid biosynthetic process // inferred from electronic annotation///0009414 // response to water deprivation // inferred from mutant phenotype///0010025 // wax biosynthetic process // inferred from mutant phenotype///0042335 // cuticle development // inferred from mutant phenotype///0042742 // defense response to bacterium // inferred from mutant phenotype///0043447 // alkane bios…
259418_at	AT1G02390	GPAT2	0.0300609	0.0092253	3.47796	0006629 // lipid metabolic process // inferred from electronic annotation///0006655 // phosphatidylglycerol biosynthetic process // inferred from reviewed computational analysis///0008152 // metabolic process // inferred from electronic annotation///0008152 // metabolic process // inferred from sequence or structural similarity///0008654 // phospholipid biosynthetic process // inferred from elect…
260932_s_at	AT1G02520///AT1G02530	PGP12	0.0139196	0.00231427	8.17962	0006200 // ATP catabolic process // inferred from electronic annotation///0006810 // transport // inferred from electronic annotation///0055085 // transmembrane transport // inferred from electronic annotation
262118_at	AT1G02850	BGLU11	0.0135521	0.00219805	40.7322	0005975 // carbohydrate metabolic process // inferred from electronic annotation///0008152 // metabolic process // inferred from electronic annotation
263168_at	AT1G03020		0.00424983	0.000157451	4.0748	0045454 // cell redox homeostasis // inferred from electronic annotation///0048653 // anther development // inferred from reviewed computational analysis
265091_s_at	AT1G03495///AT1G03940		0.0184192	0.00388007	4.70889
261125_at	AT1G04990		0.00227689	6.85389e-06	4.69388	0007623 // circadian rhythm // inferred from reviewed computational analysis///0090305 // nucleic acid phosphodiester bond hydrolysis // inferred from electronic annotation
264580_at	AT1G05340		0.00777656	0.000671944	9.99341	0010200 // response to chitin // inferred from reviewed computational analysis
263184_at	AT1G05560	UGT75B1	0.0104835	0.00128933	4.69607	0008152 // metabolic process // inferred from electronic annotation///0009407 // toxin catabolic process // inferred from reviewed computational analysis///0009751 // response to salicylic acid stimulus // inferred from expression pattern///0009920 // cell plate formation involved in plant-type cell wall biogenesis // traceable author statement///0010583 // response to cyclopentenone // inferred …
263231_at	AT1G05680	UGT74E2	0.00221523	1.16267e-06	82.2773	0006950 // response to stress // inferred from electronic annotation///0008152 // metabolic process // inferred from electronic annotation///0009407 // toxin catabolic process // inferred from reviewed computational analysis///0010016 // shoot system morphogenesis // inferred from mutant phenotype///0010583 // response to cyclopentenone // inferred from reviewed computational analysis///0042631 /…
260784_at	AT1G06180	ATMYB13	0.00559808	0.000306625	3.45784	0006355 // regulation of transcription, DNA-dependent // inferred from sequence or structural similarity///0009651 // response to salt stress // inferred from expression pattern///0009739 // response to gibberellin stimulus // inferred from expression pattern///0009751 // response to salicylic acid stimulus // inferred from expression pattern///0009753 // response to jasmonic acid stimulus // inf…
262616_at	AT1G06620		0.00404314	0.000132327	9.43475	0009414 // response to water deprivation // inferred from reviewed computational analysis///0009611 // response to wounding // inferred from reviewed computational analysis///0009867 // jasmonic acid mediated signaling pathway // inferred from reviewed computational analysis///0042538 // hyperosmotic salinity response // inferred from reviewed computational analysis///0055114 // oxidation-reducti…
261077_at	AT1G07430	HAI2	0.00655312	0.000460635	8.89224	0006470 // protein dephosphorylation // inferred from electronic annotation///0006810 // transport // inferred from electronic annotation///0006811 // ion transport // inferred from electronic annotation///0006813 // potassium ion transport // inferred from electronic annotation///0009738 // abscisic acid mediated signaling pathway // inferred from reviewed computational analysis///0009788 // neg…
261088_at	AT1G07590		0.00908762	0.000941105	6.34854	0046686 // response to cadmium ion // inferred from expression pattern
261436_at	AT1G07870		0.00296015	3.17759e-05	3.75671	0006468 // protein phosphorylation // inferred from electronic annotation///0016310 // phosphorylation // inferred from electronic annotation
264783_at	AT1G08650	PPCK1	0.00615178	0.000397973	5.6487	0006468 // protein phosphorylation // inferred from electronic annotation///0009416 // response to light stimulus // inferred from direct assay///0016310 // phosphorylation // inferred from electronic annotation///0046898 // response to cycloheximide // inferred from direct assay
264652_at	AT1G08920	ESL1	0.00461369	0.0001891	3.74105	0006810 // transport // inferred from electronic annotation///0008643 // carbohydrate transport // inferred from electronic annotation///0009414 // response to water deprivation // inferred from expression pattern///0009651 // response to salt stress // inferred from expression pattern///0009737 // response to abscisic acid stimulus // inferred from expression pattern///0015749 // monosaccharide …
264460_at	AT1G10170	ATNFXL1	0.00889075	0.000908152	5.99001	0006351 // transcription, DNA-dependent // inferred from electronic annotation///0006355 // regulation of transcription, DNA-dependent // inferred from electronic annotation///0006355 // regulation of transcription, DNA-dependent // inferred from sequence or structural similarity///0006914 // autophagy // inferred from reviewed computational analysis///0006952 // defense response // inferred from…
263207_at	AT1G10550	XTH33	0.0195795	0.00433135	9.5936	0005975 // carbohydrate metabolic process // inferred from electronic annotation///0006073 // cellular glucan metabolic process // inferred from electronic annotation///0008152 // metabolic process // inferred from electronic annotation///0009831 // plant-type cell wall modification involved in multidimensional cell growth // inferred from mutant phenotype
263210_at	AT1G10585		0.0258853	0.00703913	49.1403	0006355 // regulation of transcription, DNA-dependent // traceable author statement///0006865 // amino acid transport // inferred from reviewed computational analysis
259410_at	AT1G13340		0.00855351	0.000819854	6.12182	0006979 // response to oxidative stress // inferred from mutant phenotype///0009697 // salicylic acid biosynthetic process // inferred from reviewed computational analysis///0009863 // salicylic acid mediated signaling pathway // inferred from reviewed computational analysis///0031348 // negative regulation of defense response // inferred from reviewed computational analysis///0045087 // innate i…
262607_at	AT1G13990		0.0154336	0.00278312	6.30936	0009646 // response to absence of light // inferred from reviewed computational analysis
262653_at	AT1G14130		0.00546092	0.000288365	3.052	0055114 // oxidation-reduction process // inferred from electronic annotation
260744_at	AT1G15010		0.00404314	0.000132468	14.7031	0050832 // defense response to fungus // inferred from expression pattern
262571_at	AT1G15430		0.00927586	0.000983704	3.3267	0000165 // MAPK cascade // inferred from reviewed computational analysis///0006612 // protein targeting to membrane // inferred from reviewed computational analysis///0006944 // cellular membrane fusion // inferred from reviewed computational analysis///0007154 // cell communication // inferred from reviewed computational analysis///0007165 // signal transduction // inferred from reviewed computa…
262756_at	AT1G16370	2015-10-06	0.00307218	5.11343e-05	5.77986	0006810 // transport // inferred from electronic annotation///0006811 // ion transport // inferred from electronic annotation///0015706 // nitrate transport // inferred from reviewed computational analysis///0042631 // cellular response to water deprivation // inferred from expression pattern///0055085 // transmembrane transport // inferred from electronic annotation///0071472 // cellular respons…
262703_at	AT1G16510		0.011942	0.00171695	5.10103	0009733 // response to auxin stimulus // inferred from sequence or structural similarity///0009958 // positive gravitropism // inferred from mutant phenotype///0016049 // cell growth // inferred from mutant phenotype///0060918 // auxin transport // inferred from mutant phenotype///0090057 // root radial pattern formation // inferred from mutant phenotype
256114_at	AT1G16850		0.00445172	0.00017617	60.4968	0009651 // response to salt stress // inferred from mutant phenotype
262482_at	AT1G17020	SRG1	0.00719097	0.000571452	17.8945	0009737 // response to abscisic acid stimulus // inferred from reviewed computational analysis///0009793 // embryo development ending in seed dormancy // inferred from reviewed computational analysis///0009813 // flavonoid biosynthetic process // inferred from sequence or structural similarity///0009830 // cell wall modification involved in abscission // inferred from reviewed computational analy…
262518_at	AT1G17170	ATGSTU24	0.00829333	0.000770407	4.89038	0006635 // fatty acid beta-oxidation // inferred from reviewed computational analysis///0006950 // response to stress // inferred from electronic annotation///0009407 // toxin catabolic process // inferred from reviewed computational analysis///0009407 // toxin catabolic process // traceable author statement///0009636 // response to toxic substance // inferred from electronic annotation///0010583…
261033_at	AT1G17380	JAZ5	0.00535506	0.000274987	28.7531	0006351 // transcription, DNA-dependent // inferred from electronic annotation///0006355 // regulation of transcription, DNA-dependent // inferred from electronic annotation///0006952 // defense response // inferred from electronic annotation///0007165 // signal transduction // inferred from reviewed computational analysis///0009414 // response to water deprivation // inferred from reviewed compu…
261037_at	AT1G17420	LOX3	0.0166308	0.00322327	11.0328	0006629 // lipid metabolic process // inferred from electronic annotation///0006631 // fatty acid metabolic process // inferred from electronic annotation///0006633 // fatty acid biosynthetic process // inferred from electronic annotation///0006952 // defense response // traceable author statement///0009555 // pollen development // inferred from genetic interaction///0009611 // response to woundi…
260686_at	AT1G17620		0.0202942	0.0046205	5.29103
259403_at	AT1G17745	PGDH	0.00285464	2.82492e-05	5.88569	0006564 // L-serine biosynthetic process // inferred from electronic annotation///0006564 // L-serine biosynthetic process // traceable author statement///0006569 // tryptophan catabolic process // inferred from reviewed computational analysis///0006612 // protein targeting to membrane // inferred from reviewed computational analysis///0008152 // metabolic process // inferred from electronic anno…
255900_at	AT1G17830///AT3G20300		0.00567968	0.000324383	8.55596	0009409 // response to cold // RCA///0009414 // response to water deprivation // RCA///0009737 // response to abscisic acid stimulus // RCA///0042538 // hyperosmotic salinity response // RCA
256017_at	AT1G19180	JAZ1	0.0157779	0.0029334	14.2252	0000165 // MAPK cascade // inferred from reviewed computational analysis///0006351 // transcription, DNA-dependent // inferred from electronic annotation///0006355 // regulation of transcription, DNA-dependent // inferred from electronic annotation///0006612 // protein targeting to membrane // inferred from reviewed computational analysis///0006952 // defense response // inferred from electronic …
259516_at	AT1G20450	ERD10	0.0164766	0.00316068	3.49938	0006950 // response to stress // inferred from electronic annotation///0009269 // response to desiccation // inferred from reviewed computational analysis///0009409 // response to cold // inferred from direct assay///0009409 // response to cold // inferred from expression pattern///0009409 // response to cold // inferred from mutant phenotype///0009409 // response to cold // inferred from reviewe…
259568_at	AT1G20490		0.00893686	0.000919177	3.28616	0008152 // metabolic process // inferred from electronic annotation///0009698 // phenylpropanoid metabolic process // inferred from sequence or structural similarity
259518_at	AT1G20510	OPCL1	0.0116824	0.00161359	4.13683	0008152 // metabolic process // inferred from electronic annotation///0009611 // response to wounding // inferred from expression pattern///0009611 // response to wounding // inferred from reviewed computational analysis///0009620 // response to fungus // inferred from reviewed computational analysis///0009695 // jasmonic acid biosynthetic process // inferred from mutant phenotype///0009695 // ja…
259561_at	AT1G21250	WAK1	0.0239405	0.00619968	8.198	0000165 // MAPK cascade // inferred from reviewed computational analysis///0006468 // protein phosphorylation // inferred from electronic annotation///0006612 // protein targeting to membrane // inferred from reviewed computational analysis///0007166 // cell surface receptor signaling pathway // inferred from physical interaction///0009615 // response to virus // inferred from expression pattern/…
261934_at	AT1G22400	UGT85A1	0.0030759	5.50832e-05	7.76092	0006612 // protein targeting to membrane // inferred from reviewed computational analysis///0008152 // metabolic process // inferred from electronic annotation///0009863 // salicylic acid mediated signaling pathway // inferred from reviewed computational analysis///0009867 // jasmonic acid mediated signaling pathway // inferred from reviewed computational analysis///0010363 // regulation of plant…
264893_at	AT1G23140		0.0154307	0.0027816	3.66184
265170_at	AT1G23730	BCA3	0.00285464	2.59644e-05	12.6783	0015976 // carbon utilization // inferred from electronic annotation///0015976 // carbon utilization // inferred from sequence or structural similarity
265188_at	AT1G23800	ALDH2B7	0.00306873	4.72105e-05	5.6209	0008152 // metabolic process // inferred from electronic annotation///0010228 // vegetative to reproductive phase transition of meristem // inferred from reviewed computational analysis///0016926 // protein desumoylation // inferred from reviewed computational analysis///0050665 // hydrogen peroxide biosynthetic process // inferred from reviewed computational analysis///0055114 // oxidation-reduc…
263031_at	AT1G24070	ATCSLA10	0.0305789	0.00946283	3.24013
264868_at	AT1G24090		0.0188858	0.00406203	5.6478
255726_at	AT1G25530		0.0109068	0.00140676	3.03267	0006810 // transport // inferred from electronic annotation///0006865 // amino acid transport // inferred from sequence or structural similarity
245816_at	AT1G26210	SOFL1	0.0084913	0.000807345	4.32001	0009690 // cytokinin metabolic process // inferred from mutant phenotype///0032502 // developmental process // inferred from genetic interaction
261020_at	AT1G26390		0.0278204	0.00797885	4.01972	0055114 // oxidation-reduction process // inferred from electronic annotation
261005_at	AT1G26420		0.0229601	0.00574076	13.4221	0002679 // respiratory burst involved in defense response // inferred from reviewed computational analysis///0010200 // response to chitin // inferred from reviewed computational analysis///0055114 // oxidation-reduction process // inferred from electronic annotation
261261_at	AT1G26730		0.00221523	4.03374e-06	14.3693	0006810 // transport // inferred from electronic annotation///0006817 // phosphate ion transport // inferred from reviewed computational analysis///0016036 // cellular response to phosphate starvation // inferred from reviewed computational analysis
261266_at	AT1G26770	ATEXPA10	0.00269789	1.45807e-05	17.836	0006949 // syncytium formation // inferred from expression pattern///0009664 // plant-type cell wall organization // inferred from electronic annotation///0009826 // unidimensional cell growth // inferred from sequence or structural similarity///0009826 // unidimensional cell growth // non-traceable author statement///0009828 // plant-type cell wall loosening // inferred from mutant phenotype///0…
263680_at	AT1G26930		0.00835534	0.000781535	3.02746	0000041 // transition metal ion transport // inferred from reviewed computational analysis
265003_at	AT1G26970		0.00693936	0.000524838	4.19388	0006468 // protein phosphorylation // inferred from electronic annotation///0016310 // phosphorylation // inferred from electronic annotation
245662_at	AT1G28190		0.0125446	0.00188822	4.36178	0006612 // protein targeting to membrane // inferred from reviewed computational analysis///0009723 // response to ethylene stimulus // inferred from reviewed computational analysis///0009738 // abscisic acid mediated signaling pathway // inferred from reviewed computational analysis///0009863 // salicylic acid mediated signaling pathway // inferred from reviewed computational analysis///0009867 …
245671_at	AT1G28230	PUP1	0.00699206	0.000538228	3.40115	0006810 // transport // inferred from electronic annotation///0006863 // purine nucleobase transport // inferred from direct assay///0006863 // purine nucleobase transport // inferred from reviewed computational analysis///0010184 // cytokinin transport // inferred from direct assay///0015860 // purine nucleoside transmembrane transport // inferred from direct assay///0015931 // nucleobase-contai…
261443_at	AT1G28480	GRX480	0.0212712	0.0050561	14.1828	0000165 // MAPK cascade // inferred from reviewed computational analysis///0006355 // regulation of transcription, DNA-dependent // inferred from reviewed computational analysis///0006612 // protein targeting to membrane // inferred from reviewed computational analysis///0007154 // cell communication // inferred from reviewed computational analysis///0007165 // signal transduction // inferred fro…
262745_at	AT1G28600		0.0152202	0.00269672	4.41062	0006629 // lipid metabolic process // inferred from electronic annotation///0016042 // lipid catabolic process // inferred from electronic annotation
260897_at	AT1G29330	ERD2	0.00822221	0.00075482	3.51245	0006621 // protein retention in ER lumen // inferred from electronic annotation///0006621 // protein retention in ER lumen // inferred from genetic interaction///0006810 // transport // inferred from electronic annotation///0006914 // autophagy // inferred from reviewed computational analysis///0009414 // response to water deprivation // inferred from reviewed computational analysis///0015031 // …
259789_at	AT1G29395	COR414-TM1	0.0215627	0.00517076	3.86813	0009269 // response to desiccation // inferred from reviewed computational analysis///0009409 // response to cold // inferred from reviewed computational analysis///0009414 // response to water deprivation // inferred from reviewed computational analysis///0009631 // cold acclimation // inferred from expression pattern///0009631 // cold acclimation // inferred from mutant phenotype///0009651 // r…
256159_at	AT1G30135	JAZ8	0.00507187	0.000234422	58.6277	0006351 // transcription, DNA-dependent // inferred from electronic annotation///0006355 // regulation of transcription, DNA-dependent // inferred from electronic annotation///0006952 // defense response // inferred from electronic annotation///0009611 // response to wounding // inferred from reviewed computational analysis///0009620 // response to fungus // inferred from reviewed computational a…
263221_at	AT1G30620	MUR4	0.0226823	0.00562177	3.44081	0005975 // carbohydrate metabolic process // inferred from electronic annotation///0006012 // galactose metabolic process // inferred from electronic annotation///0009225 // nucleotide-sugar metabolic process // inferred from sequence or structural similarity///0009723 // response to ethylene stimulus // inferred from reviewed computational analysis///0009738 // abscisic acid mediated signaling p…
256489_at	AT1G31550		0.00496333	0.000223178	4.59725	0006629 // lipid metabolic process // inferred from electronic annotation///0016042 // lipid catabolic process // inferred from electronic annotation
246260_at	AT1G31820		0.00402083	0.000129006	4.66719	0003333 // amino acid transmembrane transport // inferred from electronic annotation///0006810 // transport // inferred from electronic annotation///0015846 // polyamine transport // inferred from direct assay///0016126 // sterol biosynthetic process // inferred from reviewed computational analysis///0046520 // sphingoid biosynthetic process // inferred from reviewed computational analysis///1902…
265420_s_at	AT1G31880///AT2G21030	BRX	0.0158327	0.00294968	3.01554	0009734 // auxin mediated signaling pathway // inferred from mutant phenotype///0009736 // cytokinin mediated signaling pathway // inferred from mutant phenotype///0009737 // response to abscisic acid stimulus // inferred from mutant phenotype///0048364 // root development // inferred from mutant phenotype///0048527 // lateral root development // inferred from mutant phenotype
261713_at	AT1G32640	MYC2	0.0118133	0.00166768	4.22149	0006351 // transcription, DNA-dependent // inferred from electronic annotation///0006355 // regulation of transcription, DNA-dependent // inferred from electronic annotation///0006612 // protein targeting to membrane // inferred from reviewed computational analysis///0009269 // response to desiccation // inferred from expression pattern///0009611 // response to wounding // inferred from expressio…
261192_at	AT1G32870	ANAC13	0.0115159	0.00156947	11.561	0006355 // regulation of transcription, DNA-dependent // inferred from electronic annotation///0007275 // multicellular organismal development // inferred from sequence or structural similarity///0010114 // response to red light // inferred from expression pattern///0010224 // response to UV-B // inferred from expression pattern///0016036 // cellular response to phosphate starvation // inferred f…
261240_at	AT1G32940	SBT3.5	0.0123312	0.00181887	14.435	0006508 // proteolysis // inferred from electronic annotation///0006508 // proteolysis // inferred from sequence or structural similarity///0008152 // metabolic process // not recorded///0016036 // cellular response to phosphate starvation // inferred from reviewed computational analysis///0019375 // galactolipid biosynthetic process // inferred from reviewed computational analysis///0042631 // c…
256529_at	AT1G33260		0.00781687	0.000679952	6.63576	0006468 // protein phosphorylation // inferred from electronic annotation///0016310 // phosphorylation // inferred from electronic annotation
256425_at	AT1G33560	ADR1	0.0117882	0.00165709	3.64485	0006952 // defense response // inferred from electronic annotation///0006952 // defense response // inferred from sequence or structural similarity///0009414 // response to water deprivation // inferred from mutant phenotype///0009626 // plant-type hypersensitive response // inferred from electronic annotation///0016310 // phosphorylation // traceable author statement///0042742 // defense respons…
245757_at	AT1G35140	PHI-1	0.0247192	0.0065522	7.6309	0001666 // response to hypoxia // inferred from expression pattern///0009612 // response to mechanical stimulus // inferred from reviewed computational analysis///0040007 // growth // inferred from mutant phenotype
256461_s_at	AT1G36280///AT4G18440		0.00343175	8.5097e-05	4.54713	0006188 // IMP biosynthetic process // inferred from electronic annotation///0009152 // purine ribonucleotide biosynthetic process // inferred from electronic annotation
260126_at	AT1G36370	SHM7	0.0069291	0.000522598	4.89761	0006544 // glycine metabolic process // inferred from electronic annotation///0006544 // glycine metabolic process // inferred from sequence or structural similarity///0006563 // L-serine metabolic process // inferred from electronic annotation///0006563 // L-serine metabolic process // inferred from sequence or structural similarity///0006730 // one-carbon metabolic process // inferred from elec…
259626_at	AT1G42990	ATBZIP60	0.0299236	0.00914471	5.06736	0000165 // MAPK cascade // inferred from reviewed computational analysis///0002679 // respiratory burst involved in defense response // inferred from reviewed computational analysis///0006351 // transcription, DNA-dependent // inferred from electronic annotation///0006355 // regulation of transcription, DNA-dependent // inferred from electronic annotation///0006355 // regulation of transcription,…
264415_at	AT1G43160	RAP2.6	0.00225938	5.63578e-06	47.5483	0006351 // transcription, DNA-dependent // inferred from electronic annotation///0006355 // regulation of transcription, DNA-dependent // inferred from electronic annotation///0006355 // regulation of transcription, DNA-dependent // inferred from sequence or structural similarity///0006970 // response to osmotic stress // inferred from expression pattern///0009409 // response to cold // inferred …
259507_at	AT1G43910		0.00548162	0.000291398	16.6958	0009737 // response to abscisic acid stimulus // inferred from direct assay
245244_at	AT1G44350	ILL6	0.00474401	0.000204555	11.4201	0006508 // proteolysis // inferred from sequence or structural similarity///0008152 // metabolic process // inferred from electronic annotation///0009611 // response to wounding // inferred from reviewed computational analysis///0009620 // response to fungus // inferred from reviewed computational analysis///0009694 // jasmonic acid metabolic process // inferred from reviewed computational analys…
261327_at	AT1G44830		0.00623899	0.000412032	12.0449	0006351 // transcription, DNA-dependent // inferred from electronic annotation///0006355 // regulation of transcription, DNA-dependent // inferred from electronic annotation///0006355 // regulation of transcription, DNA-dependent // inferred from sequence or structural similarity///0009873 // ethylene mediated signaling pathway // inferred from electronic annotation///1900030 // regulation of pec…
245780_at	AT1G45688		0.00800359	0.000706471	3.09183	0048767 // root hair elongation // inferred from reviewed computational analysis
261863_at	AT1G50630		0.0119392	0.00171579	3.31877
256178_s_at	AT1G51760///AT1G51780	ILL5	0.00824518	0.000763063	4.82639	0006508 // proteolysis // inferred from sequence or structural similarity///0008152 // metabolic process // inferred from electronic annotation///0009611 // response to wounding // inferred from expression pattern///0010112 // regulation of systemic acquired resistance // inferred from expression pattern
265053_at	AT1G52000		0.00863044	0.000843861	4.27721
265058_s_at	AT1G52030///AT1G52040	MBP2	0.0235635	0.00602786	17.2269	0006952 // defense response // traceable author statement///0007155 // cell adhesion // traceable author statement///0009611 // response to wounding // inferred from expression pattern///0009908 // flower development // traceable author statement
259640_at	AT1G52400	BGLU18	0.00498622	0.000226792	3.5555	0005975 // carbohydrate metabolic process // inferred from electronic annotation///0008152 // metabolic process // inferred from electronic annotation///0009414 // response to water deprivation // inferred from expression pattern///0009625 // response to insect // inferred from expression pattern///0009628 // response to abiotic stimulus // inferred from expression pattern///0009651 // response t…
259609_at	AT1G52410	TSA1	0.00749993	0.000614457	9.32858	0009640 // photomorphogenesis // inferred from mutant phenotype///0050832 // defense response to fungus // inferred from expression pattern
262148_at	AT1G52560		0.0138843	0.00230254	4.2186	0006457 // protein folding // inferred from reviewed computational analysis///0006950 // response to stress // inferred from electronic annotation///0009408 // response to heat // inferred from expression pattern///0009408 // response to heat // inferred from sequence or structural similarity///0009408 // response to heat // inferred from reviewed computational analysis///0009644 // response to h…
262226_at	AT1G53885///AT1G53903		0.0197019	0.00437436	13.1985
263174_at	AT1G54040	ESP	0.0111819	0.00147902	6.95495	0009753 // response to jasmonic acid stimulus // inferred from mutant phenotype///0009753 // response to jasmonic acid stimulus // traceable author statement///0010150 // leaf senescence // inferred from mutant phenotype///0019762 // glucosinolate catabolic process // inferred from direct assay///0042742 // defense response to bacterium // inferred from mutant phenotype///0050790 // regulation of…
263157_at	AT1G54100	ALDH7B4	0.00496333	0.000223672	5.38881	0000303 // response to superoxide // inferred from reviewed computational analysis///0006081 // cellular aldehyde metabolic process // inferred from sequence or structural similarity///0006950 // response to stress // inferred from electronic annotation///0008152 // metabolic process // inferred from electronic annotation///0009269 // response to desiccation // inferred from expression pattern///…
264186_at	AT1G54570		0.00299442	3.57448e-05	3.46604	0019432 // triglyceride biosynthetic process // inferred from genetic interaction///0033306 // phytol metabolic process // inferred from direct assay
256022_at	AT1G58360	AAP1	0.00279422	1.63352e-05	4.0364	0003333 // amino acid transmembrane transport // inferred from mutant phenotype///0006810 // transport // inferred from electronic annotation///0006865 // amino acid transport // inferred from reviewed computational analysis///0009624 // response to nematode // inferred from expression pattern///0015804 // neutral amino acid transport // inferred from genetic interaction///0043090 // amino acid i…
262099_s_at	AT1G59500///AT4G37390	GH3.4	0.00902051	0.00092952	5.27731	0009733 // response to auxin stimulus // inferred from mutant phenotype///0009733 // response to auxin stimulus // inferred from sequence or structural similarity///0010252 // auxin homeostasis // traceable author statement
262072_at	AT1G59590	ZCF37	0.00997449	0.00114453	4.03176
262916_at	AT1G59700	ATGSTU16	0.00893345	0.000916326	3.8797	0006950 // response to stress // inferred from electronic annotation///0009407 // toxin catabolic process // inferred from reviewed computational analysis///0009407 // toxin catabolic process // traceable author statement///0009636 // response to toxic substance // inferred from electronic annotation///0010583 // response to cyclopentenone // inferred from reviewed computational analysis
263734_at	AT1G60030	NAT7	0.00620894	0.00040885	3.90765	0006810 // transport // inferred from electronic annotation///0055085 // transmembrane transport // inferred from electronic annotation
265008_at	AT1G61560	MLO6	0.0282132	0.00820151	4.84745	0006952 // defense response // inferred from sequence or structural similarity///0008219 // cell death // inferred from electronic annotation///0008219 // cell death // inferred from sequence or structural similarity///0009607 // response to biotic stimulus // inferred from electronic annotation///0009817 // defense response to fungus, incompatible interaction // inferred from mutant phenotype///…
264433_at	AT1G61810	BGLU45	0.00620894	0.000407984	4.87952	0005975 // carbohydrate metabolic process // inferred from electronic annotation///0008152 // metabolic process // inferred from electronic annotation///0009809 // lignin biosynthetic process // inferred from mutant phenotype
264289_at	AT1G61890		0.0101598	0.00119638	7.23967	0006855 // drug transmembrane transport // inferred from electronic annotation///0009651 // response to salt stress // inferred from reviewed computational analysis///0009694 // jasmonic acid metabolic process // inferred from reviewed computational analysis///0009737 // response to abscisic acid stimulus // inferred from reviewed computational analysis///0009753 // response to jasmonic acid stim…
264288_at	AT1G62045		0.0218217	0.00527017	4.49032
264746_at	AT1G62300	WRKY6	0.0310843	0.00972264	3.91901	0002679 // respiratory burst involved in defense response // inferred from reviewed computational analysis///0006351 // transcription, DNA-dependent // inferred from electronic annotation///0006355 // regulation of transcription, DNA-dependent // inferred from electronic annotation///0006355 // regulation of transcription, DNA-dependent // inferred from sequence or structural similarity///0009407…
265122_at	AT1G62540	FMO GS-OX2	0.00593962	0.00036763	3.85395	0019761 // glucosinolate biosynthetic process // inferred from mutant phenotype///0055114 // oxidation-reduction process // inferred from electronic annotation
262644_at	AT1G62710	BETA-VPE	0.00588556	0.000361089	9.35967	0006508 // proteolysis // inferred from electronic annotation///0006508 // proteolysis // inferred from sequence or structural similarity///0006624 // vacuolar protein processing // inferred from sequence or structural similarity
262694_at	AT1G62790		0.0092335	0.000973983	4.03723	0006869 // lipid transport // inferred from sequence or structural similarity
257466_at	AT1G62840		0.00576565	0.000341139	3.59241
259685_at	AT1G63090	AtPP2-A11	0.00674414	0.000495951	4.07533	0016567 // protein ubiquitination // inferred from electronic annotation
261957_at	AT1G64660	ATMGL	0.00343175	7.51257e-05	18.8357	0006520 // cellular amino acid metabolic process // inferred from sequence or structural similarity///0006730 // one-carbon metabolic process // inferred from reviewed computational analysis///0009970 // cellular response to sulfate starvation // inferred from expression pattern///0019458 // methionine catabolic process via 2-oxobutanoate // traceable author statement///0042631 // cellular respon…
262860_at	AT1G64810	APO1	0.0246979	0.00654497	4.14942	0000373 // Group II intron splicing // inferred from mutant phenotype///0009658 // chloroplast organization // inferred from mutant phenotype///0010468 // regulation of gene expression // inferred from mutant phenotype///0015979 // photosynthesis // inferred from mutant phenotype
262882_at	AT1G64900	CYP89A2	0.00326793	6.61383e-05	3.71394	0055114 // oxidation-reduction process // inferred from electronic annotation
262875_at	AT1G64970	G-TMT	0.0115118	0.00156784	3.53434	0008152 // metabolic process // inferred from electronic annotation///0010189 // vitamin E biosynthetic process // inferred from mutant phenotype///0032259 // methylation // inferred from electronic annotation
264635_at	AT1G65500		0.0031263	5.79658e-05	11.5846
260135_at	AT1G66400	CML23	0.0126067	0.00190647	9.66303	0009909 // regulation of flower development // inferred from genetic interaction///0080164 // regulation of nitric oxide metabolic process // inferred from genetic interaction
256356_s_at	AT1G66500///AT5G43620		0.0240029	0.00623433	10.7436
256376_s_at	AT1G66690///AT1G66700	PXMT1	0.00421543	0.000153549	17.4399	0032259 // methylation // inferred from electronic annotation
256324_at	AT1G66760		0.00378598	0.000110423	3.32766	0006855 // drug transmembrane transport // inferred from electronic annotation///0009611 // response to wounding // inferred from expression pattern///0009611 // response to wounding // inferred from reviewed computational analysis///0009620 // response to fungus // inferred from reviewed computational analysis///0009695 // jasmonic acid biosynthetic process // inferred from reviewed computationa…
256366_at	AT1G66880		0.0195728	0.00432549	3.32527	0000165 // MAPK cascade // inferred from reviewed computational analysis///0006468 // protein phosphorylation // inferred from electronic annotation///0006612 // protein targeting to membrane // inferred from reviewed computational analysis///0009595 // detection of biotic stimulus // inferred from reviewed computational analysis///0009625 // response to insect // inferred from reviewed computati…
264992_at	AT1G67300		0.0105922	0.00131908	5.81912	0006810 // transport // inferred from electronic annotation///0008643 // carbohydrate transport // inferred from electronic annotation///0055085 // transmembrane transport // inferred from electronic annotation
260005_at	AT1G67920		0.0291009	0.00867457	3.06022
260015_at	AT1G67980	CCOAMT	0.0114846	0.00155597	8.15335	0009699 // phenylpropanoid biosynthetic process // inferred from electronic annotation///0009809 // lignin biosynthetic process // inferred from sequence or structural similarity///0032259 // methylation // inferred from electronic annotation
259859_at	AT1G68410		0.016779	0.00328851	4.18647	0008152 // metabolic process // inferred from electronic annotation
262281_at	AT1G68570		0.00652449	0.000454729	7.22486	0006810 // transport // inferred from electronic annotation///0006857 // oligopeptide transport // inferred from electronic annotation///0006857 // oligopeptide transport // inferred from sequence or structural similarity///0042128 // nitrate assimilation // inferred from electronic annotation
262232_at	AT1G68600		0.00300762	4.02027e-05	3.93605	0000023 // maltose metabolic process // inferred from reviewed computational analysis///0006810 // transport // inferred from electronic annotation///0006811 // ion transport // inferred from electronic annotation///0010044 // response to aluminum ion // inferred from electronic annotation///0015743 // malate transport // inferred from electronic annotation///0019252 // starch biosynthetic proces…
260410_at	AT1G69870	NRT1.7	0.0054352	0.000285273	9.2344	0006810 // transport // inferred from electronic annotation///0006857 // oligopeptide transport // inferred from electronic annotation///0006857 // oligopeptide transport // inferred from sequence or structural similarity///0015706 // nitrate transport // inferred from mutant phenotype///0019761 // glucosinolate biosynthetic process // inferred from reviewed computational analysis///0042128 // ni…
260408_at	AT1G69880	ATH8	0.0256556	0.00694516	15.8964	0000280 // nuclear division // inferred from reviewed computational analysis///0006662 // glycerol ether metabolic process // inferred from electronic annotation///0007000 // nucleolus organization // inferred from reviewed computational analysis///0045454 // cell redox homeostasis // inferred from electronic annotation///0055114 // oxidation-reduction process // inferred from electronic annotati…
264341_at	AT1G70270		0.00463625	0.000190323	5.94289
260333_at	AT1G70500		0.0132631	0.00210457	3.33797	0005975 // carbohydrate metabolic process // inferred from electronic annotation///0005975 // carbohydrate metabolic process // inferred from sequence or structural similarity///0008152 // metabolic process // inferred from electronic annotation///0009887 // organ morphogenesis // inferred from reviewed computational analysis///0009888 // tissue development // inferred from reviewed computational…
262314_at	AT1G70810		0.00412632	0.000142493	5.18495
259743_at	AT1G71140		0.0246148	0.00651346	6.19302	0006855 // drug transmembrane transport // inferred from electronic annotation///0055085 // transmembrane transport // inferred from electronic annotation
259937_s_at	AT1G71330///AT3G13080	ATNAP5	0.0128172	0.00196933	5.36809	0006200 // ATP catabolic process // inferred from electronic annotation///0006810 // transport // inferred from electronic annotation///0055085 // transmembrane transport // inferred from electronic annotation
256340_at	AT1G72070		0.00560606	0.000308593	4.56705	0006457 // protein folding // inferred from electronic annotation///0006457 // protein folding // inferred from sequence or structural similarity
259848_at	AT1G72180		0.00715754	0.00056551	3.09071	0002237 // response to molecule of bacterial origin // inferred from reviewed computational analysis///0006468 // protein phosphorylation // inferred from electronic annotation///0006468 // protein phosphorylation // inferred from sequence or structural similarity///0007165 // signal transduction // inferred from reviewed computational analysis///0007169 // transmembrane receptor protein tyrosine…
259850_at	AT1G72240		0.0315363	0.00996374	5.04648
259802_at	AT1G72260	THI2.1	0.00343175	8.36717e-05	12.8777	0006952 // defense response // inferred from electronic annotation///0006952 // defense response // inferred from expression pattern///0006952 // defense response // inferred from mutant phenotype///0009751 // response to salicylic acid stimulus // traceable author statement///0009867 // jasmonic acid mediated signaling pathway // inferred from genetic interaction
259852_at	AT1G72280	AERO1	0.00535506	0.000273936	4.13431	0006457 // protein folding // inferred from electronic annotation///0006984 // ER-nucleus signaling pathway // inferred from reviewed computational analysis///0034976 // response to endoplasmic reticulum stress // inferred from reviewed computational analysis///0055114 // oxidation-reduction process // inferred from electronic annotation
260429_at	AT1G72450	JAZ6	0.0180424	0.00375083	4.1565	0006351 // transcription, DNA-dependent // inferred from electronic annotation///0006355 // regulation of transcription, DNA-dependent // inferred from electronic annotation///0006952 // defense response // inferred from electronic annotation///0009611 // response to wounding // inferred from expression pattern///0009611 // response to wounding // inferred from reviewed computational analysis///0…
260423_at	AT1G72470	ATEXO70D1	0.0100199	0.00115645	3.54913	0006887 // exocytosis // inferred from electronic annotation///0006904 // vesicle docking involved in exocytosis // inferred from sequence or structural similarity
260399_at	AT1G72520		0.0151617	0.00268014	9.08622	0006629 // lipid metabolic process // inferred from electronic annotation///0006631 // fatty acid metabolic process // inferred from electronic annotation///0006633 // fatty acid biosynthetic process // inferred from electronic annotation///0006952 // defense response // traceable author statement///0009555 // pollen development // inferred from genetic interaction///0009611 // response to woundi…
259911_at	AT1G72680	CAD1	0.00412632	0.000143342	9.11272	0006635 // fatty acid beta-oxidation // inferred from reviewed computational analysis///0009627 // systemic acquired resistance // inferred from reviewed computational analysis///0009699 // phenylpropanoid biosynthetic process // inferred from electronic annotation///0009809 // lignin biosynthetic process // inferred from expression pattern///0009809 // lignin biosynthetic process // traceable au…
259915_at	AT1G72790		0.00927276	0.000979936	6.52722
259864_at	AT1G72800		0.0106839	0.00133814	3.13011
262369_at	AT1G73010	PS2	0.00451316	0.000182081	18.4625	0008152 // metabolic process // inferred from electronic annotation///0016036 // cellular response to phosphate starvation // inferred from expression pattern///0016036 // cellular response to phosphate starvation // inferred from reviewed computational analysis///0016311 // dephosphorylation // inferred from electronic annotation///0019375 // galactolipid biosynthetic process // inferred from re…
262360_at	AT1G73080///AT1G73090	PEPR1	0.0224686	0.00552078	4.6295	0006182 // cGMP biosynthetic process // inferred from direct assay///0006468 // protein phosphorylation // inferred from electronic annotation///0006468 // protein phosphorylation // inferred from sequence or structural similarity///0006952 // defense response // inferred from electronic annotation///0006955 // immune response // inferred from mutant phenotype///0007169 // transmembrane receptor …
245734_at	AT1G73480		0.0295293	0.00890659	7.78507	0009409 // response to cold // inferred from reviewed computational analysis///0009414 // response to water deprivation // inferred from reviewed computational analysis///0009737 // response to abscisic acid stimulus // inferred from reviewed computational analysis///0042538 // hyperosmotic salinity response // inferred from reviewed computational analysis
260046_at	AT1G73805		0.0273693	0.00778036	3.50125	0000165 // MAPK cascade // inferred from reviewed computational analysis///0001666 // response to hypoxia // inferred from reviewed computational analysis///0002237 // response to molecule of bacterial origin // inferred from reviewed computational analysis///0006355 // regulation of transcription, DNA-dependent // inferred from reviewed computational analysis///0006612 // protein targeting to me…
260386_at	AT1G74010		0.013268	0.00210638	20.8713	0006865 // amino acid transport // inferred from reviewed computational analysis///0009058 // biosynthetic process // inferred from electronic annotation
262177_at	AT1G74710	EDS16	0.0174118	0.00353136	3.28814	0000165 // MAPK cascade // inferred from reviewed computational analysis///0002679 // respiratory burst involved in defense response // inferred from reviewed computational analysis///0006612 // protein targeting to membrane // inferred from reviewed computational analysis///0006944 // cellular membrane fusion // inferred from reviewed computational analysis///0006952 // defense response // infer…
259953_at	AT1G74810	BOR5	0.0131794	0.00207317	3.00687	0006810 // transport // inferred from electronic annotation///0006811 // ion transport // inferred from electronic annotation///0006820 // anion transport // inferred from electronic annotation
262171_at	AT1G74950	TIFY10B	0.0194032	0.00426057	4.72188	0006351 // transcription, DNA-dependent // inferred from electronic annotation///0006355 // regulation of transcription, DNA-dependent // inferred from electronic annotation///0006612 // protein targeting to membrane // inferred from reviewed computational analysis///0006952 // defense response // inferred from electronic annotation///0007165 // signal transduction // inferred from reviewed compu…
262671_at	AT1G76040	CPK29	0.00567968	0.00032547	3.12167	0006468 // protein phosphorylation // inferred from electronic annotation///0006468 // protein phosphorylation // inferred from sequence or structural similarity///0009627 // systemic acquired resistance // inferred from reviewed computational analysis///0009697 // salicylic acid biosynthetic process // inferred from reviewed computational analysis///0016310 // phosphorylation // inferred from el…
261748_at	AT1G76070		0.00299442	3.58478e-05	4.60197	0010200 // response to chitin // inferred from reviewed computational analysis///0050832 // defense response to fungus // inferred from reviewed computational analysis
259979_at	AT1G76600		0.00427138	0.000160459	12.987	0002679 // respiratory burst involved in defense response // inferred from reviewed computational analysis///0009873 // ethylene mediated signaling pathway // inferred from reviewed computational analysis///0010200 // response to chitin // inferred from reviewed computational analysis///0035556 // intracellular signal transduction // inferred from reviewed computational analysis
259985_at	AT1G76620		0.0169609	0.0033571	3.15202
259878_at	AT1G76790		0.00381561	0.000112022	4.10458	0032259 // methylation // inferred from electronic annotation
264953_at	AT1G77120	ADH1	0.00412632	0.000141957	6.47385	0001666 // response to hypoxia // inferred from expression pattern///0001666 // response to hypoxia // inferred from reviewed computational analysis///0006970 // response to osmotic stress // inferred from genetic interaction///0009651 // response to salt stress // inferred from expression pattern///0009862 // systemic acquired resistance, salicylic acid mediated signaling pathway // inferred fro…
259705_at	AT1G77450	anac032	0.00804018	0.000719515	3.86112	0006355 // regulation of transcription, DNA-dependent // inferred from electronic annotation///0007275 // multicellular organismal development // inferred from sequence or structural similarity///0009407 // toxin catabolic process // inferred from reviewed computational analysis///0010583 // response to cyclopentenone // inferred from reviewed computational analysis
259729_at	AT1G77640		0.0198934	0.00445309	8.26475	0006351 // transcription, DNA-dependent // inferred from electronic annotation///0006355 // regulation of transcription, DNA-dependent // inferred from electronic annotation///0006355 // regulation of transcription, DNA-dependent // inferred from sequence or structural similarity///0009741 // response to brassinosteroid stimulus // inferred from reviewed computational analysis///0009873 // ethyle…
263120_at	AT1G78490	CYP708A3	0.00458155	0.000186017	3.3783	0055114 // oxidation-reduction process // inferred from electronic annotation
261394_at	AT1G79680	WAKL10	0.0164276	0.00314779	9.0731	0006182 // cGMP biosynthetic process // inferred from direct assay///0006468 // protein phosphorylation // inferred from electronic annotation///0006468 // protein phosphorylation // inferred from sequence or structural similarity///0006952 // defense response // inferred from expression pattern///0009617 // response to bacterium // inferred from expression pattern///0009620 // response to fungus…
262050_at	AT1G80130		0.0150927	0.00264855	22.9644	0006979 // response to oxidative stress // inferred from mutant phenotype
261899_at	AT1G80820	CCR2	0.0144536	0.00245856	5.02372	0006952 // defense response // inferred from electronic annotation///0007623 // circadian rhythm // inferred from expression pattern///0009409 // response to cold // inferred from expression pattern///0009699 // phenylpropanoid biosynthetic process // inferred from electronic annotation///0009809 // lignin biosynthetic process // non-traceable author statement///0010200 // response to chitin // i…
265732_at	AT2G01300		0.0177641	0.00365284	5.62626
265221_s_at	AT2G02000///AT2G02010	GAD3	0.00709947	0.000556978	19.3009	0006536 // glutamate metabolic process // inferred from electronic annotation///0019752 // carboxylic acid metabolic process // inferred from electronic annotation
266232_at	AT2G02310	AtPP2-B6	0.0281927	0.00819012	4.74977	0052542 // defense response by callose deposition // inferred from reviewed computational analysis
266181_at	AT2G02390	ATGSTZ1	0.0109068	0.00140669	3.66683	0006635 // fatty acid beta-oxidation // inferred from reviewed computational analysis///0006950 // response to stress // inferred from electronic annotation///0009072 // aromatic amino acid family metabolic process // inferred from electronic annotation///0009407 // toxin catabolic process // inferred from reviewed computational analysis///0009407 // toxin catabolic process // traceable author st…
266743_at	AT2G02990///AT2G16300	RNS1	0.00363692	0.000100234	69.8115	0006865 // amino acid transport // inferred from reviewed computational analysis///0006950 // response to stress // inferred from electronic annotation///0007568 // aging // inferred from expression pattern///0009611 // response to wounding // inferred from expression pattern///0009718 // anthocyanin-containing compound biosynthetic process // inferred from mutant phenotype///0009867 // jasmonic …
264042_at	AT2G03760	ST	0.00834769	0.000779747	28.2997	0000165 // MAPK cascade // inferred from reviewed computational analysis///0006612 // protein targeting to membrane // inferred from reviewed computational analysis///0006952 // defense response // inferred from expression pattern///0006952 // defense response // inferred from mutant phenotype///0009595 // detection of biotic stimulus // inferred from reviewed computational analysis///0009610 // …
263405_s_at	AT2G04066///AT2G04080		0.00307218	5.18563e-05	5.88128	0006855 // drug transmembrane transport // inferred from electronic annotation///0055085 // transmembrane transport // inferred from electronic annotation
263406_at	AT2G04160	AIR3	0.00442372	0.000173925	5.09338	0006508 // proteolysis // inferred from electronic annotation///0006508 // proteolysis // inferred from sequence or structural similarity///0008152 // metabolic process // not recorded///0009733 // response to auxin stimulus // inferred from expression pattern///0010102 // lateral root morphogenesis // inferred from expression pattern///0019761 // glucosinolate biosynthetic process // inferred fr…
263811_at	AT2G04350	LACS8	0.00285464	2.74155e-05	3.5733	0001676 // long-chain fatty acid metabolic process // inferred from direct assay///0001676 // long-chain fatty acid metabolic process // inferred from sequence or structural similarity///0006629 // lipid metabolic process // inferred from electronic annotation///0006631 // fatty acid metabolic process // traceable author statement///0006633 // fatty acid biosynthetic process // inferred from sequ…
263852_at	AT2G04450	ATNUDT6	0.00285464	2.48737e-05	9.63285	0000165 // MAPK cascade // inferred from reviewed computational analysis///0006612 // protein targeting to membrane // inferred from reviewed computational analysis///0009595 // detection of biotic stimulus // inferred from reviewed computational analysis///0009627 // systemic acquired resistance // inferred from reviewed computational analysis///0009697 // salicylic acid biosynthetic process // …
265530_at	AT2G06050	OPR3	0.0110159	0.001437	6.60382	0006569 // tryptophan catabolic process // inferred from reviewed computational analysis///0006629 // lipid metabolic process // inferred from electronic annotation///0006631 // fatty acid metabolic process // inferred from electronic annotation///0006633 // fatty acid biosynthetic process // inferred from electronic annotation///0007165 // signal transduction // inferred from reviewed computatio…
263391_at	AT2G11810	MGDC	0.0104299	0.00127175	7.19456	0005975 // carbohydrate metabolic process // inferred from electronic annotation///0006631 // fatty acid metabolic process // inferred from genetic interaction///0006631 // fatty acid metabolic process // inferred from mutant phenotype///0009247 // glycolipid biosynthetic process // inferred from electronic annotation///0016036 // cellular response to phosphate starvation // inferred from express…
263297_at	AT2G15310	ATARFB1A	0.00343175	7.94295e-05	3.47227	0006810 // transport // inferred from electronic annotation///0007264 // small GTPase mediated signal transduction // inferred from electronic annotation///0015031 // protein transport // inferred from electronic annotation///0016192 // vesicle-mediated transport // inferred from electronic annotation
265501_at	AT2G15490	UGT73B4	0.00586243	0.000357787	4.76372	0008152 // metabolic process // inferred from electronic annotation///0009407 // toxin catabolic process // inferred from reviewed computational analysis///0009636 // response to toxic substance // inferred from electronic annotation///0009723 // response to ethylene stimulus // inferred from reviewed computational analysis///0010583 // response to cyclopentenone // inferred from reviewed computa…
265414_at	AT2G16660		0.0125395	0.001881	22.5034	0080167 // response to karrikin // inferred from expression pattern
265354_at	AT2G16700	ADF5	0.00303216	4.16053e-05	5.92869	0030042 // actin filament depolymerization // inferred from electronic annotation
263582_at	AT2G17120	LYM2	0.00658802	0.000470367	3.21091	0006952 // defense response // inferred from electronic annotation///0009627 // systemic acquired resistance // inferred from reviewed computational analysis///0016998 // cell wall macromolecule catabolic process // inferred from electronic annotation///0016998 // cell wall macromolecule catabolic process // inferred from sequence or structural similarity///0034976 // response to endoplasmic reti…
264907_at	AT2G17280		0.015531	0.00282632	4.16389	0008152 // metabolic process // inferred from sequence or structural similarity
264787_at	AT2G17840	ERD7	0.0258013	0.00699979	3.40051	0009409 // response to cold // inferred from expression pattern///0009409 // response to cold // inferred from reviewed computational analysis///0009414 // response to water deprivation // inferred from expression pattern///0009414 // response to water deprivation // inferred from reviewed computational analysis///0009644 // response to high light intensity // inferred from expression pattern///0…
265817_at	AT2G18050	HIS1-3	0.00437855	0.000170475	8.38705	0006334 // nucleosome assembly // inferred from electronic annotation///0006334 // nucleosome assembly // inferred from sequence or structural similarity///0009414 // response to water deprivation // inferred from expression pattern
263062_at	AT2G18180		0.031297	0.00982604	5.64554	0006810 // transport // inferred from sequence or structural similarity///0015031 // protein transport // inferred from electronic annotation
266070_at	AT2G18660	EXLB3	0.0292343	0.00872934	30.7302	0009627 // systemic acquired resistance // inferred from reviewed computational analysis///0010230 // alternative respiration // inferred from direct assay///0034976 // response to endoplasmic reticulum stress // inferred from reviewed computational analysis
265597_at	AT2G20142		0.0121968	0.00178571	11.2233	0007165 // signal transduction // inferred from electronic annotation
263544_at	AT2G21590	APL4	0.0159026	0.00297191	8.24433	0005978 // glycogen biosynthetic process // inferred from electronic annotation///0008152 // metabolic process // inferred from electronic annotation///0009058 // biosynthetic process // inferred from electronic annotation///0009853 // photorespiration // inferred from reviewed computational analysis///0019252 // starch biosynthetic process // inferred from reviewed computational analysis///00192…
263515_at	AT2G21640		0.00227689	7.25072e-06	20.9488	0006979 // response to oxidative stress // inferred from direct assay
264005_at	AT2G22470	AGP2	0.00353573	9.47191e-05	4.85159	0010167 // response to nitrate // inferred from reviewed computational analysis///0015706 // nitrate transport // inferred from reviewed computational analysis
266799_at	AT2G22860	ATPSK2	0.00581402	0.000349176	16.4952	0007275 // multicellular organismal development // inferred from electronic annotation///0008283 // cell proliferation // inferred from electronic annotation///0008283 // cell proliferation // inferred from sequence or structural similarity///0009887 // organ morphogenesis // inferred from sequence or structural similarity///0030154 // cell differentiation // inferred from sequence or structural …
267256_s_at	AT2G23000///AT2G23010	scpl10	0.00299442	3.56793e-05	7.15771	0006508 // proteolysis // inferred from electronic annotation///0006508 // proteolysis // inferred from sequence or structural similarity
267260_at	AT2G23130	AGP17	0.00412632	0.000140264	4.28488
267266_at	AT2G23150	NRAMP3	0.0229212	0.00572553	3.71841	0006810 // transport // inferred from electronic annotation///0006811 // ion transport // inferred from electronic annotation///0006828 // manganese ion transport // inferred from mutant phenotype///0006828 // manganese ion transport // inferred from reviewed computational analysis///0006828 // manganese ion transport // traceable author statement///0006875 // cellular metal ion homeostasis // no…
245076_at	AT2G23170	GH3.3	0.0299521	0.00917151	13.4392	0009733 // response to auxin stimulus // inferred from sequence or structural similarity///0010252 // auxin homeostasis // traceable author statement
267128_at	AT2G23620	MES1	0.0255525	0.00690275	3.79815	0006952 // defense response // inferred from electronic annotation///0009627 // systemic acquired resistance // inferred from genetic interaction///0009696 // salicylic acid metabolic process // inferred from mutant phenotype///0009817 // defense response to fungus, incompatible interaction // traceable author statement///0045087 // innate immune response // inferred from electronic annotation
265999_at	AT2G24100		0.0162247	0.00308422	4.39501
245052_at	AT2G26440		0.0272888	0.00773646	3.08758	0042545 // cell wall modification // inferred from electronic annotation///0043086 // negative regulation of catalytic activity // inferred from electronic annotation///0045490 // pectin catabolic process // inferred from electronic annotation
266316_at	AT2G27080		0.0173601	0.00351184	7.24674
266209_at	AT2G27550	ATC	0.00652449	0.000451782	3.04853	0000041 // transition metal ion transport // inferred from reviewed computational analysis///0009910 // negative regulation of flower development // inferred from mutant phenotype///0010228 // vegetative to reproductive phase transition of meristem // inferred from mutant phenotype
266246_at	AT2G27690	CYP94C1	0.0152985	0.00273633	11.3261	0007165 // signal transduction // inferred from reviewed computational analysis///0009414 // response to water deprivation // inferred from reviewed computational analysis///0009611 // response to wounding // inferred from expression pattern///0009611 // response to wounding // inferred from reviewed computational analysis///0009620 // response to fungus // inferred from reviewed computational an…
266140_at	AT2G28120		0.00344654	8.85691e-05	5.95148	0055085 // transmembrane transport // inferred from electronic annotation
266163_at	AT2G28130		0.0193176	0.00421572	3.56203
265572_at	AT2G28210	ATACA2	0.011893	0.00170151	5.95433	0006730 // one-carbon metabolic process // inferred from electronic annotation///0006730 // one-carbon metabolic process // inferred from sequence or structural similarity///0009723 // response to ethylene stimulus // inferred from reviewed computational analysis///0010037 // response to carbon dioxide // inferred from expression pattern
265276_at	AT2G28400		0.0130486	0.00203713	11.4191
266225_at	AT2G28900	ATOEP16-1	0.00285464	2.27402e-05	3.74956	0003333 // amino acid transmembrane transport // inferred from mutant phenotype///0006810 // transport // inferred from electronic annotation///0006811 // ion transport // inferred from electronic annotation///0009409 // response to cold // inferred from expression pattern///0009409 // response to cold // inferred from reviewed computational analysis///0009611 // response to wounding // inferred …
266271_at	AT2G29440	ATGSTU6	0.0171522	0.00343463	9.1074	0009407 // toxin catabolic process // traceable author statement///0009636 // response to toxic substance // inferred from electronic annotation
266299_at	AT2G29450	ATGSTU5	0.0205477	0.00474553	3.21674	0006950 // response to stress // inferred from electronic annotation///0006979 // response to oxidative stress // inferred from expression pattern///0009407 // toxin catabolic process // inferred from reviewed computational analysis///0009407 // toxin catabolic process // traceable author statement///0009636 // response to toxic substance // inferred from electronic annotation///0009694 // jasmon…
266267_at	AT2G29460	ATGSTU4	0.00562905	0.000311826	50.7154	0009407 // toxin catabolic process // inferred from reviewed computational analysis///0009407 // toxin catabolic process // traceable author statement///0009636 // response to toxic substance // inferred from electronic annotation///0010583 // response to cyclopentenone // inferred from reviewed computational analysis
266269_at	AT2G29480	ATGSTU2	0.00429792	0.000162686	5.8068	0009407 // toxin catabolic process // inferred from reviewed computational analysis///0009407 // toxin catabolic process // traceable author statement///0009636 // response to toxic substance // inferred from electronic annotation///0010043 // response to zinc ion // inferred from reviewed computational analysis///0010583 // response to cyclopentenone // inferred from reviewed computational analy…
266294_at	AT2G29500		0.00343175	8.44177e-05	8.90314	0006457 // protein folding // inferred from reviewed computational analysis///0006950 // response to stress // inferred from electronic annotation///0006979 // response to oxidative stress // inferred from expression pattern///0009408 // response to heat // inferred from expression pattern///0009408 // response to heat // inferred from sequence or structural similarity///0009408 // response to he…
266835_at	AT2G29990	NDA2	0.0131973	0.00208958	5.03756	0055114 // oxidation-reduction process // inferred from electronic annotation
266832_at	AT2G30040	MAPKKK14	0.00896053	0.000922762	7.85862	0006468 // protein phosphorylation // inferred from electronic annotation///0009658 // chloroplast organization // inferred from mutant phenotype///0009737 // response to abscisic acid stimulus // inferred from reviewed computational analysis///0009738 // abscisic acid mediated signaling pathway // inferred from reviewed computational analysis///0009753 // response to jasmonic acid stimulus // in…
267300_at	AT2G30140		0.00474401	0.000205108	7.44761	0008152 // metabolic process // inferred from electronic annotation///0009407 // toxin catabolic process // inferred from reviewed computational analysis///0009627 // systemic acquired resistance // inferred from reviewed computational analysis///0009909 // regulation of flower development // inferred from mutant phenotype///0010583 // response to cyclopentenone // inferred from reviewed computat…
267246_at	AT2G30250	WRKY25	0.0204634	0.00469172	10.0435	0002237 // response to molecule of bacterial origin // inferred from reviewed computational analysis///0006351 // transcription, DNA-dependent // inferred from electronic annotation///0006355 // regulation of transcription, DNA-dependent // inferred from electronic annotation///0006355 // regulation of transcription, DNA-dependent // inferred from sequence or structural similarity///0006612 // pr…
255872_at	AT2G30360	SIP4	0.00914919	0.000956885	3.01005	0006468 // protein phosphorylation // inferred from direct assay///0006468 // protein phosphorylation // inferred from electronic annotation///0007165 // signal transduction // inferred from electronic annotation///0009268 // response to pH // inferred from mutant phenotype///0009611 // response to wounding // inferred from reviewed computational analysis///0009620 // response to fungus // inferr…
267496_at	AT2G30550		0.019201	0.00416684	9.62518	0006612 // protein targeting to membrane // inferred from reviewed computational analysis///0006629 // lipid metabolic process // inferred from electronic annotation///0006629 // lipid metabolic process // inferred from sequence or structural similarity///0009697 // salicylic acid biosynthetic process // inferred from reviewed computational analysis///0009863 // salicylic acid mediated signaling …
266469_at	AT2G31180	MYB14	0.00935563	0.00100747	3.55941	0006355 // regulation of transcription, DNA-dependent // inferred from sequence or structural similarity///0009651 // response to salt stress // inferred from expression pattern///0009723 // response to ethylene stimulus // inferred from expression pattern///0009733 // response to auxin stimulus // inferred from expression pattern///0009751 // response to salicylic acid stimulus // inferred from …
265668_at	AT2G32020		0.00305702	4.36773e-05	24.6018	0008152 // metabolic process // inferred from sequence or structural similarity///0009737 // response to abscisic acid stimulus // inferred from expression pattern
267604_at	AT2G32930	ZFN2	0.0125726	0.00189566	4.54397	0006355 // regulation of transcription, DNA-dependent // inferred from reviewed computational analysis
267597_at	AT2G33020	AtRLP24	0.0227124	0.00563837	3.53179	0007165 // signal transduction // inferred by curator
255795_at	AT2G33380	RD20	0.00584226	0.000353933	61.446	0009269 // response to desiccation // inferred from expression pattern///0009269 // response to desiccation // traceable author statement///0009409 // response to cold // inferred from expression pattern///0009409 // response to cold // inferred from reviewed computational analysis///0009414 // response to water deprivation // inferred from reviewed computational analysis///0009620 // response to…
255787_at	AT2G33590		0.00285464	2.72982e-05	5.33558	0009408 // response to heat // inferred from expression pattern///0009414 // response to water deprivation // inferred from expression pattern///0009737 // response to abscisic acid stimulus // inferred from expression pattern///0009809 // lignin biosynthetic process // inferred from sequence or structural similarity///0044237 // cellular metabolic process // inferred from electronic annotation//…
256725_at	AT2G34070	TBL37	0.0103551	0.00125096	9.19969
267040_at	AT2G34300		0.00997449	0.00114541	3.73383	0032259 // methylation // inferred from electronic annotation
267003_at	AT2G34340		0.015505	0.00281276	3.46207	0009062 // fatty acid catabolic process // inferred from reviewed computational analysis///0009739 // response to gibberellin stimulus // inferred from expression pattern
266995_at	AT2G34500	CYP710A1	0.00588315	0.000360185	4.9977	0006629 // lipid metabolic process // inferred from electronic annotation///0006694 // steroid biosynthetic process // inferred from electronic annotation///0008202 // steroid metabolic process // inferred from electronic annotation///0009407 // toxin catabolic process // inferred from reviewed computational analysis///0010583 // response to cyclopentenone // inferred from reviewed computational …
266901_at	AT2G34600	JAZ7	0.00990706	0.00112525	65.341	0002679 // respiratory burst involved in defense response // inferred from reviewed computational analysis///0006351 // transcription, DNA-dependent // inferred from electronic annotation///0006355 // regulation of transcription, DNA-dependent // inferred from electronic annotation///0006952 // defense response // inferred from electronic annotation///0007165 // signal transduction // inferred fr…
267425_at	AT2G34810		0.00221523	2.12167e-06	8.68679	0009611 // response to wounding // inferred from expression pattern///0009611 // response to wounding // inferred from reviewed computational analysis///0009620 // response to fungus // inferred from reviewed computational analysis///0009695 // jasmonic acid biosynthetic process // inferred from reviewed computational analysis///0009753 // response to jasmonic acid stimulus // inferred from expre…
266545_at	AT2G35290		0.00737993	0.000596425	3.23868	0009741 // response to brassinosteroid stimulus // inferred from reviewed computational analysis
266618_at	AT2G35480		0.00555014	0.000301547	4.1812
263948_at	AT2G35980	YLS9	0.00859776	0.000832932	10.8841	0000165 // MAPK cascade // inferred from reviewed computational analysis///0002679 // respiratory burst involved in defense response // inferred from reviewed computational analysis///0006612 // protein targeting to membrane // inferred from reviewed computational analysis///0006944 // cellular membrane fusion // inferred from reviewed computational analysis///0009862 // systemic acquired resista…
265200_s_at	AT2G36790///AT2G36800	UGT73C6	0.00225938	5.26139e-06	20.1224	0008152 // metabolic process // inferred from electronic annotation///0016131 // brassinosteroid metabolic process // inferred from direct assay///0051555 // flavonol biosynthetic process // inferred from direct assay///0051555 // flavonol biosynthetic process // inferred from mutant phenotype
265446_at	AT2G37110		0.00413899	0.000145959	3.1348	0006499 // N-terminal protein myristoylation // inferred from reviewed computational analysis///0006865 // amino acid transport // inferred from reviewed computational analysis///0010200 // response to chitin // inferred from reviewed computational analysis
267169_at	AT2G37540		0.00375872	0.000108903	3.21888	0008152 // metabolic process // inferred from electronic annotation///0009860 // pollen tube growth // inferred from expression pattern///0055114 // oxidation-reduction process // inferred from electronic annotation
267177_at	AT2G37580		0.00285464	2.123e-05	3.62786	0016567 // protein ubiquitination // inferred from electronic annotation
267181_at	AT2G37760		0.00496333	0.000223838	9.57648	0006950 // response to stress // inferred from electronic annotation///0009409 // response to cold // inferred from expression pattern///0009414 // response to water deprivation // inferred from expression pattern///0009636 // response to toxic substance // inferred from electronic annotation///0009651 // response to salt stress // inferred from expression pattern///0046482 // para-aminobenzoic a…
267168_at	AT2G37770		0.0219725	0.00532443	69.0584	0006950 // response to stress // inferred from electronic annotation///0009409 // response to cold // inferred from expression pattern///0009414 // response to water deprivation // inferred from expression pattern///0009636 // response to toxic substance // inferred from electronic annotation///0009651 // response to salt stress // inferred from expression pattern///0055114 // oxidation-reduction…
266098_at	AT2G37870		0.00282745	1.69662e-05	68.8384	0006508 // proteolysis // inferred from electronic annotation///0006810 // transport // inferred from electronic annotation///0006869 // lipid transport // inferred from electronic annotation///0006869 // lipid transport // inferred from sequence or structural similarity
267142_at	AT2G38290	ATAMT2	0.0222319	0.00543025	3.84551	0000165 // MAPK cascade // inferred from reviewed computational analysis///0002237 // response to molecule of bacterial origin // inferred from reviewed computational analysis///0006612 // protein targeting to membrane // inferred from reviewed computational analysis///0006810 // transport // inferred from electronic annotation///0006820 // anion transport // inferred from reviewed computational …
266415_at	AT2G38530	LTP2	0.00752918	0.000622031	7.74935	0006649 // phospholipid transfer to membrane // non-traceable author statement///0006810 // transport // inferred from electronic annotation///0006869 // lipid transport // inferred from electronic annotation///0009414 // response to water deprivation // inferred from expression pattern///0012501 // programmed cell death // inferred from genetic interaction
266420_at	AT2G38610		0.00526431	0.000260747	4.54034
266418_at	AT2G38750	ANNAT4	0.00920883	0.000967264	5.45655	0006950 // response to stress // inferred from electronic annotation///0006970 // response to osmotic stress // inferred from mutant phenotype///0009408 // response to heat // inferred from expression pattern///0009409 // response to cold // inferred from expression pattern///0009414 // response to water deprivation // inferred from expression pattern///0009651 // response to salt stress // infer…
266419_at	AT2G38760	ANNAT3	0.0127995	0.00195866	3.10219	0009408 // response to heat // inferred from expression pattern///0009409 // response to cold // inferred from expression pattern///0009414 // response to water deprivation // inferred from expression pattern///0009651 // response to salt stress // inferred from expression pattern
266396_at	AT2G38790		0.00805551	0.00072244	5.98193
266170_at	AT2G39050		0.00362155	9.91123e-05	6.95791
266992_at	AT2G39200	MLO12	0.00567968	0.000322134	3.40983	0002679 // respiratory burst involved in defense response // inferred from reviewed computational analysis///0006857 // oligopeptide transport // inferred from reviewed computational analysis///0006865 // amino acid transport // inferred from reviewed computational analysis///0006952 // defense response // inferred from mutant phenotype///0006952 // defense response // inferred from sequence or s…
266989_at	AT2G39330	JAL23	0.00705529	0.000550699	17.9059
266977_at	AT2G39420		0.0230219	0.00576509	3.35855
263829_at	AT2G40435		0.0133147	0.00211875	6.40531
266368_at	AT2G41380		0.027846	0.00799121	4.55199	0008152 // metabolic process // inferred from electronic annotation///0009407 // toxin catabolic process // inferred from reviewed computational analysis///0010583 // response to cyclopentenone // inferred from reviewed computational analysis///0032259 // methylation // inferred from electronic annotation///0046686 // response to cadmium ion // inferred from expression pattern
266371_at	AT2G41410		0.0188682	0.00404977	4.49049
245119_at	AT2G41640		0.00567968	0.000323259	5.89697	0010200 // response to chitin // inferred from reviewed computational analysis
260522_x_at	AT2G41730		0.00402383	0.000130291	45.6754	0009061 // anaerobic respiration // inferred from expression pattern///0009061 // anaerobic respiration // inferred from mutant phenotype
263495_at	AT2G42530	COR15B	0.0108581	0.00139371	4.22898	0009409 // response to cold // inferred from sequence or structural similarity///0010150 // leaf senescence // inferred from mutant phenotype///0042631 // cellular response to water deprivation // inferred from reviewed computational analysis///0050832 // defense response to fungus // inferred from expression pattern
263497_at	AT2G42540	COR15A	0.0110159	0.00143803	100.776	0000165 // MAPK cascade // inferred from reviewed computational analysis///0006355 // regulation of transcription, DNA-dependent // inferred from reviewed computational analysis///0006612 // protein targeting to membrane // inferred from reviewed computational analysis///0006970 // response to osmotic stress // inferred from genetic interaction///0009409 // response to cold // inferred from expre…
263986_at	AT2G42790	CSY3	0.00515673	0.000250277	3.10159	0006099 // tricarboxylic acid cycle // inferred from electronic annotation///0006099 // tricarboxylic acid cycle // inferred from sequence or structural similarity///0006635 // fatty acid beta-oxidation // inferred from genetic interaction///0006635 // fatty acid beta-oxidation // inferred from reviewed computational analysis///0007031 // peroxisome organization // inferred from reviewed computat…
265260_at	AT2G43000	anac042	0.00824518	0.000763285	10.6652	0005992 // trehalose biosynthetic process // inferred from mutant phenotype///0006351 // transcription, DNA-dependent // inferred from electronic annotation///0006355 // regulation of transcription, DNA-dependent // inferred from electronic annotation///0006561 // proline biosynthetic process // inferred from mutant phenotype///0007275 // multicellular organismal development // inferred from sequ…
265244_at	AT2G43018///AT2G43020	ATPAO2	0.00223476	4.83668e-06	8.42047	0006598 // polyamine catabolic process // inferred from direct assay///0009409 // response to cold // inferred from reviewed computational analysis///0009414 // response to water deprivation // inferred from reviewed computational analysis///0009737 // response to abscisic acid stimulus // inferred from reviewed computational analysis///0055114 // oxidation-reduction process // inferred from dire…
260551_at	AT2G43510	ATTI1	0.00872164	0.0008666	12.8483	0006952 // defense response // inferred from electronic annotation///0006952 // defense response // traceable author statement///0031640 // killing of cells of other organism // inferred from electronic annotation///0050832 // defense response to fungus // inferred from mutant phenotype
260541_at	AT2G43530		0.00615178	0.000397871	6.27892	0000023 // maltose metabolic process // inferred from reviewed computational analysis///0006952 // defense response // inferred from electronic annotation///0019252 // starch biosynthetic process // inferred from reviewed computational analysis///0031640 // killing of cells of other organism // inferred from electronic annotation///0050832 // defense response to fungus // inferred from electronic…
260568_at	AT2G43570	CHI	0.0188191	0.00402803	17.6939	0005975 // carbohydrate metabolic process // inferred from electronic annotation///0006032 // chitin catabolic process // inferred from electronic annotation///0016998 // cell wall macromolecule catabolic process // inferred from electronic annotation
260567_at	AT2G43820	UGT74F2	0.0103104	0.00123995	5.80598	0008152 // metabolic process // inferred from electronic annotation///0009696 // salicylic acid metabolic process // inferred from mutant phenotype///0010167 // response to nitrate // inferred from reviewed computational analysis///0015706 // nitrate transport // inferred from reviewed computational analysis///0018874 // benzoate metabolic process // inferred from direct assay///0046482 // para-a…
267229_s_at	AT2G44070///AT5G38640		0.0153152	0.00274603	11.5467	0006413 // translational initiation // inferred from sequence or structural similarity///0044237 // cellular metabolic process // inferred from electronic annotation///0045947 // negative regulation of translational initiation // not recorded///0050790 // regulation of catalytic activity // not recorded
267389_at	AT2G44460	BGLU28	0.00297154	3.30256e-05	46.7501	0005975 // carbohydrate metabolic process // inferred from electronic annotation///0008152 // metabolic process // inferred from electronic annotation///0080167 // response to karrikin // inferred from expression pattern
266132_at	AT2G45130	SPX3	0.0274122	0.00779785	3.01682	0006817 // phosphate ion transport // inferred from reviewed computational analysis///0016036 // cellular response to phosphate starvation // inferred from expression pattern///0016036 // cellular response to phosphate starvation // inferred from reviewed computational analysis///0019375 // galactolipid biosynthetic process // inferred from reviewed computational analysis///0045892 // negative re…
245136_at	AT2G45210		0.0128985	0.00199271	5.23172	0009733 // response to auxin stimulus // inferred from sequence or structural similarity///1900057 // positive regulation of leaf senescence // inferred from mutant phenotype
265452_at	AT2G46510	ATAIB	0.00796392	0.000700412	5.35794	0006351 // transcription, DNA-dependent // inferred from electronic annotation///0006355 // regulation of transcription, DNA-dependent // traceable author statement///0006612 // protein targeting to membrane // inferred from reviewed computational analysis///0007165 // signal transduction // inferred from reviewed computational analysis///0009414 // response to water deprivation // inferred from …
266327_at	AT2G46680	ATHB-7	0.0035158	9.37336e-05	4.41035	0006351 // transcription, DNA-dependent // inferred from electronic annotation///0006355 // regulation of transcription, DNA-dependent // inferred from electronic annotation///0006355 // regulation of transcription, DNA-dependent // inferred from sequence or structural similarity///0006950 // response to stress // inferred from electronic annotation///0009409 // response to cold // inferred from …
266752_at	AT2G47000	ABCB4	0.00221523	1.25442e-06	7.84439	0000303 // response to superoxide // inferred from reviewed computational analysis///0006200 // ATP catabolic process // inferred from electronic annotation///0006810 // transport // inferred from electronic annotation///0006888 // ER to Golgi vesicle-mediated transport // inferred from reviewed computational analysis///0007165 // signal transduction // inferred from reviewed computational analys…
263320_at	AT2G47180	AtGolS1	0.00221523	9.39395e-07	11.686	0005975 // carbohydrate metabolic process // inferred from electronic annotation///0006012 // galactose metabolic process // inferred from direct assay///0006979 // response to oxidative stress // inferred from expression pattern///0009408 // response to heat // inferred from expression pattern///0009409 // response to cold // inferred from mutant phenotype///0009414 // response to water deprivat…
245173_at	AT2G47520	HRE2	0.00344654	8.69942e-05	21.739	0006351 // transcription, DNA-dependent // inferred from electronic annotation///0006355 // regulation of transcription, DNA-dependent // inferred from electronic annotation///0006355 // regulation of transcription, DNA-dependent // inferred from sequence or structural similarity///0009873 // ethylene mediated signaling pathway // inferred from electronic annotation///0034059 // response to anoxi…
245151_at	AT2G47550		0.00306873	4.57467e-05	3.98878	0042545 // cell wall modification // inferred from electronic annotation///0043086 // negative regulation of catalytic activity // inferred from electronic annotation///0045490 // pectin catabolic process // inferred from electronic annotation
245127_at	AT2G47600	ATMHX	0.0115159	0.00157069	4.50412	0006810 // transport // inferred from electronic annotation///0006811 // ion transport // inferred from electronic annotation///0006812 // cation transport // inferred by curator///0006826 // iron ion transport // inferred from genetic interaction///0006829 // zinc ion transport // inferred from genetic interaction///0006829 // zinc ion transport // traceable author statement///0015693 // magnesi…
266503_at	AT2G47780		0.00803191	0.000712067	7.22318	0009062 // fatty acid catabolic process // inferred from reviewed computational analysis
258975_at	AT3G01970	WRKY45	0.00474401	0.000204997	5.32805	0006351 // transcription, DNA-dependent // inferred from electronic annotation///0006355 // regulation of transcription, DNA-dependent // inferred from electronic annotation///0006355 // regulation of transcription, DNA-dependent // inferred from sequence or structural similarity
258610_at	AT3G02875	ILR1	0.00979509	0.00110373	4.89267	0006508 // proteolysis // inferred from sequence or structural similarity///0008152 // metabolic process // inferred from electronic annotation///0009850 // auxin metabolic process // inferred from mutant phenotype///0046482 // para-aminobenzoic acid metabolic process // inferred from reviewed computational analysis
259058_at	AT3G03470	CYP89A9	0.0165083	0.00316802	5.52478	0055114 // oxidation-reduction process // inferred from electronic annotation
259173_at	AT3G03640	BGLU25	0.00299442	3.46203e-05	7.31263	0005975 // carbohydrate metabolic process // inferred from electronic annotation
258815_at	AT3G04000		0.00227689	6.81789e-06	20.0072	0008152 // metabolic process // inferred from electronic annotation///0008152 // metabolic process // inferred from sequence or structural similarity///0009407 // toxin catabolic process // inferred from reviewed computational analysis///0010583 // response to cyclopentenone // inferred from reviewed computational analysis///0046482 // para-aminobenzoic acid metabolic process // inferred from rev…
258577_at	AT3G04220		0.0163486	0.00312603	4.11906	0006952 // defense response // inferred from electronic annotation///0006952 // defense response // inferred from sequence or structural similarity///0007165 // signal transduction // inferred from electronic annotation
259134_at	AT3G05390		0.0157106	0.00288471	3.48347	0032259 // methylation // inferred from electronic annotation
259133_at	AT3G05400		0.00307218	5.30667e-05	11.8195	0006810 // transport // inferred from electronic annotation///0008643 // carbohydrate transport // inferred from electronic annotation///0055085 // transmembrane transport // inferred from electronic annotation
258901_at	AT3G05640		0.0169109	0.00333898	7.39455	0008152 // metabolic process // inferred from electronic annotation///0009409 // response to cold // inferred from reviewed computational analysis///0009414 // response to water deprivation // inferred from expression pattern///0009414 // response to water deprivation // inferred from reviewed computational analysis///0009737 // response to abscisic acid stimulus // inferred from reviewed computa…
258894_at	AT3G05650	AtRLP32	0.0118417	0.00168884	5.61612	0000165 // MAPK cascade // inferred from reviewed computational analysis///0006355 // regulation of transcription, DNA-dependent // inferred from reviewed computational analysis///0006612 // protein targeting to membrane // inferred from reviewed computational analysis///0006952 // defense response // inferred from sequence or structural similarity///0007165 // signal transduction // inferred by …
258507_at	AT3G06500		0.0253922	0.00683715	6.40316	0007623 // circadian rhythm // inferred from expression pattern///0008152 // metabolic process // inferred from electronic annotation///0009693 // ethylene biosynthetic process // inferred from reviewed computational analysis///0010029 // regulation of seed germination // inferred from mutant phenotype///0048510 // regulation of timing of transition from vegetative to reproductive phase // inferr…
258555_at	AT3G06860	MFP2	0.00576446	0.000337156	3.37725	0006629 // lipid metabolic process // inferred from electronic annotation///0006631 // fatty acid metabolic process // inferred from electronic annotation///0006635 // fatty acid beta-oxidation // inferred from expression pattern///0006635 // fatty acid beta-oxidation // inferred from reviewed computational analysis///0007031 // peroxisome organization // inferred from reviewed computational anal…
258983_at	AT3G08860	PYD4	0.00548947	0.000293239	6.99428	0007568 // aging // inferred from reviewed computational analysis///0008152 // metabolic process // inferred from electronic annotation///0009830 // cell wall modification involved in abscission // inferred from reviewed computational analysis///0009853 // photorespiration // inferred from electronic annotation///0043562 // cellular response to nitrogen levels // inferred from expression pattern
257522_at	AT3G08990		0.0153152	0.00274568	3.99659
259033_at	AT3G09405///AT3G09410		0.0120975	0.00175641	7.91004
258652_at	AT3G09910	ATRABC2B	0.00618724	0.000401459	3.06008	0006355 // regulation of transcription, DNA-dependent // inferred from electronic annotation///0006810 // transport // inferred from electronic annotation///0007264 // small GTPase mediated signal transduction // inferred from electronic annotation///0015031 // protein transport // inferred from electronic annotation
258941_at	AT3G09940	MDHAR	0.0152506	0.00270505	5.67058	0007165 // signal transduction // inferred from reviewed computational analysis///0009414 // response to water deprivation // inferred from expression pattern///0009414 // response to water deprivation // inferred from reviewed computational analysis///0009610 // response to symbiotic fungus // inferred from expression pattern///0009611 // response to wounding // inferred from reviewed computatio…
258923_at	AT3G10450	SCPL7	0.0121307	0.00176658	4.06564	0006508 // proteolysis // inferred from electronic annotation///0006508 // proteolysis // inferred from sequence or structural similarity
256431_s_at	AT3G11010///AT5G27060	AtRLP34	0.0256085	0.00692281	4.28423	0006952 // defense response // inferred from sequence or structural similarity///0007165 // signal transduction // inferred by curator
256252_at	AT3G11340		0.0231364	0.005833	4.53353	0006952 // defense response // inferred from mutant phenotype///0008152 // metabolic process // inferred from electronic annotation///0010150 // leaf senescence // inferred from mutant phenotype///0050832 // defense response to fungus // inferred from expression pattern
259293_at	AT3G11580		0.0137427	0.00225661	4.29569	0006351 // transcription, DNA-dependent // inferred from electronic annotation///0006355 // regulation of transcription, DNA-dependent // inferred from electronic annotation///0009062 // fatty acid catabolic process // inferred from reviewed computational analysis
256244_at	AT3G12520	SULTR4;2	0.00864059	0.000848522	4.66912	0006810 // transport // inferred from electronic annotation///0008272 // sulfate transport // inferred from electronic annotation///0055085 // transmembrane transport // inferred from electronic annotation
256245_at	AT3G12580	HSP70	0.0145812	0.00249827	4.36489	0006351 // transcription, DNA-dependent // inferred from electronic annotation///0006355 // regulation of transcription, DNA-dependent // inferred from electronic annotation///0006457 // protein folding // inferred from reviewed computational analysis///0006457 // protein folding // traceable author statement///0006950 // response to stress // inferred from electronic annotation///0009266 // resp…
256779_at	AT3G13784	AtcwINV5	0.00545242	0.000287227	8.32025	0005975 // carbohydrate metabolic process // inferred from electronic annotation///0008152 // metabolic process // inferred from electronic annotation
258201_at	AT3G13910		0.00285464	2.14696e-05	3.07704
258063_at	AT3G14620	CYP72A8	0.0148462	0.00257962	5.62799	0007623 // circadian rhythm // inferred from expression pattern///0055114 // oxidation-reduction process // inferred from electronic annotation
258395_at	AT3G15500	ANAC055	0.00997449	0.00114539	5.26418	0000165 // MAPK cascade // inferred from reviewed computational analysis///0006351 // transcription, DNA-dependent // inferred from electronic annotation///0006355 // regulation of transcription, DNA-dependent // inferred from electronic annotation///0006612 // protein targeting to membrane // inferred from reviewed computational analysis///0007154 // cell communication // inferred from reviewed …
258270_at	AT3G15650		0.008934	0.000918309	10.2304
259329_at	AT3G16360	AHP4	0.0234969	0.00600327	4.35087	0000160 // phosphorelay signal transduction system // inferred from electronic annotation///0000160 // phosphorelay signal transduction system // inferred from sequence or structural similarity///0009736 // cytokinin mediated signaling pathway // inferred from mutant phenotype///0080036 // regulation of cytokinin mediated signaling pathway // inferred from genetic interaction
256763_at	AT3G16860	COBL8	0.00861217	0.00083742	5.66211	0010215 // cellulose microfibril organization // inferred from electronic annotation///0016049 // cell growth // inferred from electronic annotation
257881_at	AT3G17180	scpl33	0.00954159	0.00104868	3.76656	0006508 // proteolysis // inferred from electronic annotation///0006508 // proteolysis // inferred from sequence or structural similarity
258158_at	AT3G17790	PAP17	0.0053341	0.000266073	8.59163	0016036 // cellular response to phosphate starvation // inferred from reviewed computational analysis///0016311 // dephosphorylation // inferred from direct assay///0019375 // galactolipid biosynthetic process // inferred from reviewed computational analysis///0030643 // cellular phosphate ion homeostasis // inferred from expression pattern///0042542 // response to hydrogen peroxide // inferred f…
257026_at	AT3G19200		0.0187862	0.00401045	3.13616	0010089 // xylem development // inferred from reviewed computational analysis///0044036 // cell wall macromolecule metabolic process // inferred from reviewed computational analysis
257022_at	AT3G19580	AZF2	0.0161369	0.0030521	5.11917	0002679 // respiratory burst involved in defense response // inferred from reviewed computational analysis///0006351 // transcription, DNA-dependent // inferred from electronic annotation///0006355 // regulation of transcription, DNA-dependent // inferred from electronic annotation///0007165 // signal transduction // inferred from reviewed computational analysis///0009414 // response to water dep…
256627_at	AT3G19970		0.00437855	0.000170788	12.1645	0006612 // protein targeting to membrane // inferred from reviewed computational analysis///0009414 // response to water deprivation // inferred from reviewed computational analysis///0009611 // response to wounding // inferred from reviewed computational analysis///0009620 // response to fungus // inferred from reviewed computational analysis///0009695 // jasmonic acid biosynthetic process // in…
257129_at	AT3G20100	CYP705A19	0.00418653	0.000150298	5.14351	0055114 // oxidation-reduction process // inferred from electronic annotation
257672_at	AT3G20300		0.0174118	0.00352997	7.01377	0009409 // response to cold // inferred from reviewed computational analysis///0009414 // response to water deprivation // inferred from reviewed computational analysis///0009737 // response to abscisic acid stimulus // inferred from reviewed computational analysis///0042538 // hyperosmotic salinity response // inferred from reviewed computational analysis
257087_at	AT3G20500	PAP18	0.00299442	3.76254e-05	3.99463	0015824 // proline transport // inferred from reviewed computational analysis
256697_at	AT3G20660	AtOCT4	0.0126757	0.00192757	3.04732	0006635 // fatty acid beta-oxidation // inferred from reviewed computational analysis///0006810 // transport // inferred from electronic annotation///0006811 // ion transport // inferred from electronic annotation///0009407 // toxin catabolic process // inferred from reviewed computational analysis///0010583 // response to cyclopentenone // inferred from reviewed computational analysis///0015706 …
258181_at	AT3G21670		0.00747199	0.00060963	3.01468	0006810 // transport // inferred from electronic annotation///0006857 // oligopeptide transport // inferred from electronic annotation///0006857 // oligopeptide transport // inferred from sequence or structural similarity///0042128 // nitrate assimilation // inferred from electronic annotation
257949_at	AT3G21750	UGT71B1	0.00412632	0.00013841	3.42175	0008152 // metabolic process // inferred from electronic annotation
258452_at	AT3G22370	AOX1A	0.00306873	4.57988e-05	12.0344	0007585 // respiratory gaseous exchange // inferred from electronic annotation///0009409 // response to cold // inferred from mutant phenotype///0031930 // mitochondria-nucleus signaling pathway // inferred from expression pattern///0045333 // cellular respiration // inferred from direct assay///0055114 // oxidation-reduction process // inferred from electronic annotation///0055114 // oxidation-r…
256927_at	AT3G22550		0.015732	0.00289701	3.13537
256839_at	AT3G22930	CML11	0.0157592	0.00291953	3.841	0030048 // actin filament-based movement // inferred from reviewed computational analysis///0051645 // Golgi localization // inferred from reviewed computational analysis///0051646 // mitochondrion localization // inferred from reviewed computational analysis///0060151 // peroxisome localization // inferred from reviewed computational analysis
257925_at	AT3G23170		0.0156546	0.00286213	8.67487
257927_at	AT3G23240	ERF1	0.0235635	0.00602471	16.0039	0006351 // transcription, DNA-dependent // inferred from electronic annotation///0006355 // regulation of transcription, DNA-dependent // inferred from electronic annotation///0006355 // regulation of transcription, DNA-dependent // traceable author statement///0006952 // defense response // inferred from mutant phenotype///0009867 // jasmonic acid mediated signaling pathway // traceable author s…
258108_at	AT3G23570		0.00260745	1.32332e-05	3.81245
256861_at	AT3G23920	BAM1	0.0173974	0.00352397	3.69014	0000272 // polysaccharide catabolic process // inferred from electronic annotation///0005975 // carbohydrate metabolic process // inferred from electronic annotation///0005983 // starch catabolic process // inferred from mutant phenotype///0008152 // metabolic process // inferred from electronic annotation///0009414 // response to water deprivation // inferred from expression pattern
258133_at	AT3G24500	MBF1C	0.0294722	0.00885147	3.15959	0006351 // transcription, DNA-dependent // inferred from sequence or structural similarity///0006355 // regulation of transcription, DNA-dependent // inferred from electronic annotation///0006457 // protein folding // inferred from reviewed computational analysis///0009408 // response to heat // inferred from expression pattern///0009408 // response to heat // inferred from reviewed computational…
257100_at	AT3G25010	AtRLP41	0.0283392	0.00827408	7.69147	0006952 // defense response // inferred from sequence or structural similarity///0007165 // signal transduction // inferred by curator///0009627 // systemic acquired resistance // inferred from reviewed computational analysis///0034976 // response to endoplasmic reticulum stress // inferred from reviewed computational analysis
257840_at	AT3G25250	AGC2-1	0.0138099	0.00227655	15.6076	0006468 // protein phosphorylation // inferred from direct assay///0006468 // protein phosphorylation // inferred from electronic annotation///0006952 // defense response // inferred from electronic annotation///0006979 // response to oxidative stress // inferred from expression pattern///0009611 // response to wounding // inferred from expression pattern///0010200 // response to chitin // inferr…
256762_at	AT3G25655	IDL1	0.0153434	0.00275503	17.9825	0010227 // floral organ abscission // inferred from mutant phenotype///0048765 // root hair cell differentiation // inferred from reviewed computational analysis
257641_s_at	AT3G25760///AT3G25770	AOC1	0.0066646	0.00048297	5.27455	0006950 // response to stress // inferred from electronic annotation///0009269 // response to desiccation // inferred from expression pattern///0009409 // response to cold // inferred from expression pattern///0009695 // jasmonic acid biosynthetic process // traceable author statement
257644_at	AT3G25780	AOC3	0.00343668	8.61273e-05	6.10835	0006612 // protein targeting to membrane // inferred from reviewed computational analysis///0009611 // response to wounding // inferred from reviewed computational analysis///0009620 // response to fungus // inferred from expression pattern///0009620 // response to fungus // inferred from reviewed computational analysis///0009651 // response to salt stress // inferred from expression pattern///00…
257628_at	AT3G26290	CYP71B26	0.0046629	0.000193514	4.92889	0055114 // oxidation-reduction process // inferred from electronic annotation
257830_at	AT3G26690	ATNUDX13	0.0044823	0.000180223	4.1622
258259_s_at	AT3G26820///AT3G26840		0.00285464	2.66517e-05	12.817	0008152 // metabolic process // inferred from electronic annotation///0019432 // triglyceride biosynthetic process // inferred from genetic interaction///0033306 // phytol metabolic process // inferred from direct assay
258277_at	AT3G26830	PAD3	0.00239191	8.29778e-06	18.7763	0000165 // MAPK cascade // inferred from reviewed computational analysis///0006612 // protein targeting to membrane // inferred from reviewed computational analysis///0006952 // defense response // inferred from mutant phenotype///0009414 // response to water deprivation // inferred from expression pattern///0009595 // detection of biotic stimulus // inferred from reviewed computational analysis/…
257271_at	AT3G28007		0.00470127	0.000199636	6.86343	0006810 // transport // inferred from electronic annotation///0008643 // carbohydrate transport // inferred from electronic annotation
257071_at	AT3G28180	ATCSLC04	0.00555014	0.000302705	3.70811
256576_at	AT3G28210	PMZ	0.00928223	0.000985111	14.9863	0006612 // protein targeting to membrane // inferred from reviewed computational analysis///0007165 // signal transduction // inferred from reviewed computational analysis///0009407 // toxin catabolic process // inferred from reviewed computational analysis///0009414 // response to water deprivation // inferred from reviewed computational analysis///0009611 // response to wounding // inferred fro…
256577_at	AT3G28220		0.025948	0.0070789	5.67177	0031540 // regulation of anthocyanin biosynthetic process // inferred from reviewed computational analysis
256601_s_at	AT3G28290///AT3G28300	AT14A	0.00351579	9.27445e-05	24.1119	0008360 // regulation of cell shape // inferred from mutant phenotype///0016337 // cell-cell adhesion // inferred from mutant phenotype
256633_at	AT3G28340	GATL10	0.0239572	0.00621015	7.13254	0006979 // response to oxidative stress // inferred from expression pattern///0009738 // abscisic acid mediated signaling pathway // inferred from reviewed computational analysis///0016051 // carbohydrate biosynthetic process // inferred from sequence or structural similarity///0030968 // endoplasmic reticulum unfolded protein response // inferred from reviewed computational analysis///0035556 //…
257774_at	AT3G29250		0.00221523	4.26937e-06	5.76856	0008152 // metabolic process // inferred from electronic annotation///0055114 // oxidation-reduction process // inferred from electronic annotation
255723_at	AT3G29575	AFP3	0.018858	0.00404259	4.69297	0009738 // abscisic acid mediated signaling pathway // inferred from reviewed computational analysis///0045893 // positive regulation of transcription, DNA-dependent // inferred from reviewed computational analysis
256598_at	AT3G30180	BR6OX2	0.0239405	0.00619913	3.60402	0006629 // lipid metabolic process // inferred from electronic annotation///0006694 // steroid biosynthetic process // inferred from electronic annotation///0016132 // brassinosteroid biosynthetic process // inferred from direct assay///0055114 // oxidation-reduction process // inferred from electronic annotation
252740_at	AT3G43270		0.00259785	1.25169e-05	24.0363	0006865 // amino acid transport // inferred from reviewed computational analysis///0015824 // proline transport // inferred from reviewed computational analysis///0042545 // cell wall modification // inferred from electronic annotation///0043086 // negative regulation of catalytic activity // inferred from electronic annotation///0045490 // pectin catabolic process // inferred from electronic ann…
252677_at	AT3G44320	NIT3	0.00307218	4.92136e-05	7.01161	0006807 // nitrogen compound metabolic process // inferred from electronic annotation///0009970 // cellular response to sulfate starvation // inferred from expression pattern///0019762 // glucosinolate catabolic process // traceable author statement///0046686 // response to cadmium ion // inferred from expression pattern
252652_at	AT3G44720	ADT4	0.00769204	0.000647684	3.87023	0006612 // protein targeting to membrane // inferred from reviewed computational analysis///0008652 // cellular amino acid biosynthetic process // inferred from electronic annotation///0009073 // aromatic amino acid family biosynthetic process // inferred from electronic annotation///0009094 // L-phenylalanine biosynthetic process // inferred from electronic annotation///0009094 // L-phenylalanin…
252624_at	AT3G44735	PSK1	0.00935563	0.00101189	3.40053	0007275 // multicellular organismal development // inferred from electronic annotation///0008283 // cell proliferation // inferred from electronic annotation///0030154 // cell differentiation // inferred from electronic annotation
246340_s_at	AT3G44860///AT3G44870	FAMT	0.00303216	4.20754e-05	116.323	0032259 // methylation // inferred from electronic annotation
252618_at	AT3G45140	LOX2	0.00471984	0.000200728	8.2491	0000023 // maltose metabolic process // inferred from reviewed computational analysis///0000096 // sulfur amino acid metabolic process // inferred from reviewed computational analysis///0006546 // glycine catabolic process // inferred from reviewed computational analysis///0006629 // lipid metabolic process // inferred from electronic annotation///0006631 // fatty acid metabolic process // inferr…
252563_at	AT3G45970	ATEXLA1	0.00547768	0.000290317	7.89117	0009826 // unidimensional cell growth // non-traceable author statement///0009828 // plant-type cell wall loosening // non-traceable author statement
252482_at	AT3G46670	UGT76E11	0.00402083	0.00012832	8.69168	0008152 // metabolic process // inferred from electronic annotation
252414_at	AT3G47420	PS3	0.00355865	9.60093e-05	3.63181	0006810 // transport // inferred from electronic annotation///0008643 // carbohydrate transport // inferred from sequence or structural similarity///0055062 // phosphate ion homeostasis // inferred from expression pattern///0055085 // transmembrane transport // inferred from electronic annotation
252377_at	AT3G47960		0.00313391	6.01403e-05	3.3965	0006810 // transport // inferred from electronic annotation///0006857 // oligopeptide transport // inferred from sequence or structural similarity///0090449 // phloem glucosinolate loading // inferred from mutant phenotype///1901349 // glucosinolate transport // inferred from direct assay
252400_at	AT3G48020		0.00699206	0.000535063	4.00663
252321_at	AT3G48510		0.0140209	0.00234011	3.60051
252368_at	AT3G48520	CYP94B3	0.00383337	0.000113282	19.8211	0002213 // defense response to insect // inferred from mutant phenotype///0009555 // pollen development // inferred from mutant phenotype///0009611 // response to wounding // inferred from expression pattern///0009611 // response to wounding // inferred from reviewed computational analysis///0009620 // response to fungus // inferred from reviewed computational analysis///0009694 // jasmonic acid …
252346_at	AT3G48650		0.0246148	0.00650988	3.62793
252269_at	AT3G49580	LSU1	0.00406404	0.000134458	27.1537
252265_at	AT3G49620	DIN11	0.00498622	0.000226632	10.3869	0007568 // aging // traceable author statement///0009267 // cellular response to starvation // traceable author statement///0009723 // response to ethylene stimulus // inferred from reviewed computational analysis///0055114 // oxidation-reduction process // inferred from electronic annotation
252179_at	AT3G50760	GATL2	0.0157938	0.00293839	6.58452	0009611 // response to wounding // inferred from reviewed computational analysis///0009620 // response to fungus // inferred from reviewed computational analysis///0009695 // jasmonic acid biosynthetic process // inferred from reviewed computational analysis///0009753 // response to jasmonic acid stimulus // inferred from reviewed computational analysis///0016051 // carbohydrate biosynthetic proc…
252136_at	AT3G50770	CML41	0.00658802	0.000468394	12.5202	0043090 // amino acid import // inferred from reviewed computational analysis
252131_at	AT3G50930	BCS1	0.00652449	0.000457365	38.7863	0009611 // response to wounding // inferred from reviewed computational analysis///0009612 // response to mechanical stimulus // inferred from reviewed computational analysis///0009627 // systemic acquired resistance // inferred from reviewed computational analysis///0009697 // salicylic acid biosynthetic process // inferred from reviewed computational analysis///0010200 // response to chitin // …
252102_at	AT3G50970	LTI30	0.00307218	5.45112e-05	3.79139	0006950 // response to stress // inferred from electronic annotation///0009409 // response to cold // inferred from expression pattern///0009409 // response to cold // inferred from reviewed computational analysis///0009414 // response to water deprivation // inferred from expression pattern///0009414 // response to water deprivation // inferred from reviewed computational analysis///0009415 // r…
252117_at	AT3G51430	YLS2	0.00553659	0.000298775	5.44662	0009058 // biosynthetic process // inferred from electronic annotation///0009821 // alkaloid biosynthetic process // inferred from sequence or structural similarity
252114_at	AT3G51450		0.00699206	0.000534756	13.64	0009058 // biosynthetic process // inferred from electronic annotation///0009611 // response to wounding // inferred from reviewed computational analysis///0009620 // response to fungus // inferred from reviewed computational analysis///0009694 // jasmonic acid metabolic process // inferred from reviewed computational analysis///0009695 // jasmonic acid biosynthetic process // inferred from revie…
252076_at	AT3G51660		0.0300543	0.00922133	5.01071	0006569 // tryptophan catabolic process // inferred from reviewed computational analysis///0006954 // inflammatory response // inferred from sequence or structural similarity///0009684 // indoleacetic acid biosynthetic process // inferred from reviewed computational analysis///0051707 // response to other organism // inferred from sequence or structural similarity
246302_at	AT3G51860	CAX3	0.00259785	1.14259e-05	14.4349	0006793 // phosphorus metabolic process // inferred from genetic interaction///0006810 // transport // inferred from electronic annotation///0006811 // ion transport // inferred from electronic annotation///0006812 // cation transport // inferred from electronic annotation///0006812 // cation transport // inferred from sequence or structural similarity///0006814 // sodium ion transport // inferre…
256676_at	AT3G52180	SEX4	0.0125446	0.00188806	6.29655	0000023 // maltose metabolic process // inferred from reviewed computational analysis///0005975 // carbohydrate metabolic process // inferred from electronic annotation///0005982 // starch metabolic process // inferred from mutant phenotype///0005982 // starch metabolic process // inferred from reviewed computational analysis///0005982 // starch metabolic process // traceable author statement///0…
251971_at	AT3G53160	UGT73C7	0.0157692	0.00292515	18.6713	0008152 // metabolic process // inferred from electronic annotation///0051707 // response to other organism // inferred from expression pattern
251961_at	AT3G53620	AtPPa4	0.00655494	0.000462375	3.39117	0006796 // phosphate-containing compound metabolic process // inferred from electronic annotation///0008152 // metabolic process // inferred from sequence or structural similarity///0046686 // response to cadmium ion // inferred from expression pattern
251910_at	AT3G53810		0.0087762	0.000876595	4.78537	0006468 // protein phosphorylation // inferred from electronic annotation///0006612 // protein targeting to membrane // inferred from reviewed computational analysis///0006944 // cellular membrane fusion // inferred from reviewed computational analysis///0007275 // multicellular organismal development // inferred from electronic annotation///0009555 // pollen development // inferred from mutant p…
251928_at	AT3G53980		0.00597171	0.000375581	3.02447	0006869 // lipid transport // inferred from sequence or structural similarity
251922_at	AT3G54030		0.0128172	0.00197132	3.0536	0006468 // protein phosphorylation // inferred from electronic annotation///0016310 // phosphorylation // inferred from electronic annotation
251861_at	AT3G54810	BME3	0.00735917	0.000591438	3.5186	0006351 // transcription, DNA-dependent // inferred from electronic annotation///0006355 // regulation of transcription, DNA-dependent // inferred from electronic annotation///0007623 // circadian rhythm // inferred from expression pattern///0009845 // seed germination // inferred from mutant phenotype///0045893 // positive regulation of transcription, DNA-dependent // inferred from electronic an…
251780_s_at	AT3G55290///AT3G55310		0.00728118	0.000582609	4.45255	0008152 // metabolic process // inferred from electronic annotation///0055114 // oxidation-reduction process // inferred from electronic annotation
251804_at	AT3G55430		0.00221523	2.6088e-06	3.45627	0005975 // carbohydrate metabolic process // inferred from electronic annotation///0010200 // response to chitin // inferred from reviewed computational analysis
251722_at	AT3G56200		0.00394675	0.000121197	7.09848	0006865 // amino acid transport // inferred from sequence or structural similarity
246293_at	AT3G56710	SIB1	0.024527	0.00647374	4.85514	0000165 // MAPK cascade // inferred from reviewed computational analysis///0006952 // defense response // inferred from electronic annotation///0006995 // cellular response to nitrogen starvation // inferred from reviewed computational analysis///0009627 // systemic acquired resistance // inferred from reviewed computational analysis///0009697 // salicylic acid biosynthetic process // inferred fr…
251621_at	AT3G57700		0.00343175	7.94786e-05	7.83039	0000165 // MAPK cascade // inferred from reviewed computational analysis///0006468 // protein phosphorylation // inferred from electronic annotation///0009693 // ethylene biosynthetic process // inferred from reviewed computational analysis///0009697 // salicylic acid biosynthetic process // inferred from reviewed computational analysis///0009862 // systemic acquired resistance, salicylic acid me…
251503_at	AT3G59140	ATMRP14	0.00299442	3.80891e-05	7.9251	0006200 // ATP catabolic process // inferred from electronic annotation///0006810 // transport // inferred from electronic annotation///0055085 // transmembrane transport // inferred from electronic annotation
251479_at	AT3G59700	ATHLECRK	0.0292491	0.00873753	5.87261	0006468 // protein phosphorylation // inferred from electronic annotation///0006499 // N-terminal protein myristoylation // inferred from reviewed computational analysis///0006865 // amino acid transport // inferred from reviewed computational analysis///0016310 // phosphorylation // inferred from electronic annotation///0030968 // endoplasmic reticulum unfolded protein response // inferred from …
251432_at	AT3G59820		0.00421465	0.000152931	4.79915
251427_at	AT3G60130	BGLU16	0.00226104	6.338e-06	3.55225	0005975 // carbohydrate metabolic process // inferred from electronic annotation///0006816 // calcium ion transport // inferred from reviewed computational analysis///0007030 // Golgi organization // inferred from reviewed computational analysis///0008152 // metabolic process // inferred from electronic annotation///0009651 // response to salt stress // inferred from reviewed computational analys…
251400_at	AT3G60420		0.0187599	0.00400283	20.1061	0002237 // response to molecule of bacterial origin // inferred from reviewed computational analysis///0009627 // systemic acquired resistance // inferred from reviewed computational analysis///0009697 // salicylic acid biosynthetic process // inferred from reviewed computational analysis///0009863 // salicylic acid mediated signaling pathway // inferred from reviewed computational analysis///003…
251336_at	AT3G61190	BAP1	0.0167469	0.00326202	5.4094	0006952 // defense response // inferred from electronic annotation///0009266 // response to temperature stimulus // inferred from expression pattern///0009408 // response to heat // inferred from expression pattern///0009409 // response to cold // inferred from expression pattern///0009611 // response to wounding // inferred from expression pattern///0009611 // response to wounding // inferred fr…
251282_at	AT3G61630	CRF6	0.00487345	0.000215401	11.1493	0006351 // transcription, DNA-dependent // inferred from electronic annotation///0006355 // regulation of transcription, DNA-dependent // inferred from electronic annotation///0006355 // regulation of transcription, DNA-dependent // inferred from sequence or structural similarity///0009736 // cytokinin mediated signaling pathway // inferred from electronic annotation///0009793 // embryo developme…
251259_at	AT3G62260		0.0069291	0.000521759	4.20536	0006470 // protein dephosphorylation // inferred from electronic annotation///0010200 // response to chitin // inferred from reviewed computational analysis
251192_at	AT3G62720	XT1	0.00555014	0.000301132	3.154	0000271 // polysaccharide biosynthetic process // inferred from direct assay///0006486 // protein glycosylation // inferred from electronic annotation///0009612 // response to mechanical stimulus // inferred from reviewed computational analysis///0009969 // xyloglucan biosynthetic process // inferred from genetic interaction///0010200 // response to chitin // inferred from reviewed computational …
251207_at	AT3G63050		0.00343175	8.54965e-05	7.03267
255622_at	AT4G01070	GT72B1	0.00754851	0.000627796	3.63521	0006612 // protein targeting to membrane // inferred from reviewed computational analysis///0006805 // xenobiotic metabolic process // inferred from mutant phenotype///0008152 // metabolic process // inferred from electronic annotation///0009611 // response to wounding // inferred from reviewed computational analysis///0009636 // response to toxic substance // inferred from direct assay///0009651…
255604_at	AT4G01080	TBL26	0.0283392	0.00827014	10.3757
255575_at	AT4G01430		0.0295015	0.00887465	3.8347	0009830 // cell wall modification involved in abscission // inferred from reviewed computational analysis
255543_at	AT4G01870		0.0239537	0.00620617	6.68758	0006508 // proteolysis // inferred from electronic annotation///0009407 // toxin catabolic process // inferred from reviewed computational analysis///0009723 // response to ethylene stimulus // inferred from reviewed computational analysis///0009738 // abscisic acid mediated signaling pathway // inferred from reviewed computational analysis///0010583 // response to cyclopentenone // inferred from…
255549_at	AT4G01950	GPAT3	0.0170094	0.00337324	3.88925	0006629 // lipid metabolic process // inferred from electronic annotation///0006655 // phosphatidylglycerol biosynthetic process // inferred from reviewed computational analysis///0008152 // metabolic process // inferred from electronic annotation///0008152 // metabolic process // inferred from sequence or structural similarity///0008654 // phospholipid biosynthetic process // inferred from elect…
255506_at	AT4G02130	GATL6	0.00831209	0.000775068	3.02757	0016051 // carbohydrate biosynthetic process // inferred from sequence or structural similarity///0045489 // pectin biosynthetic process // inferred from electronic annotation
255403_at	AT4G03400	DFL2	0.0127819	0.00195515	7.09104	0009416 // response to light stimulus // inferred from expression pattern///0009651 // response to salt stress // inferred from reviewed computational analysis///0009733 // response to auxin stimulus // inferred from expression pattern///0009733 // response to auxin stimulus // inferred from sequence or structural similarity///0009737 // response to abscisic acid stimulus // inferred from reviewe…
255348_at	AT4G03820		0.00655312	0.00046127	4.55214
255360_at	AT4G03960		0.00303216	4.18268e-05	3.75233	0007243 // intracellular protein kinase cascade // inferred from reviewed computational analysis///0016311 // dephosphorylation // inferred from electronic annotation///0035335 // peptidyl-tyrosine dephosphorylation // inferred from electronic annotation///0043407 // negative regulation of MAP kinase activity // inferred from reviewed computational analysis///1900424 // regulation of defense resp…
255364_s_at	AT4G04020///AT4G22240	FIB	0.00343175	8.36097e-05	3.99283	0009409 // response to cold // inferred from expression pattern///0009737 // response to abscisic acid stimulus // inferred from expression pattern///0010205 // photoinhibition // inferred from mutant phenotype
255284_at	AT4G04610	2015-04-01	0.00283149	1.81902e-05	3.80397	0000103 // sulfate assimilation // inferred from direct assay///0000103 // sulfate assimilation // inferred from genetic interaction///0006950 // response to stress // inferred from electronic annotation///0008152 // metabolic process // inferred from electronic annotation///0008652 // cellular amino acid biosynthetic process // inferred from electronic annotation///0009684 // indoleacetic acid b…
255259_at	AT4G05020	NDB2	0.00535506	0.000273232	4.87946	0055114 // oxidation-reduction process // inferred from electronic annotation
255250_at	AT4G05100	AtMYB74	0.0117882	0.00165663	8.27238	0006355 // regulation of transcription, DNA-dependent // inferred from sequence or structural similarity///0007165 // signal transduction // inferred from reviewed computational analysis///0009414 // response to water deprivation // inferred from reviewed computational analysis///0009611 // response to wounding // inferred from reviewed computational analysis///0009651 // response to salt stress …
255065_s_at	AT4G08870///AT4G08900		0.011212	0.00148739	9.12782	0000050 // urea cycle // inferred from electronic annotation///0006525 // arginine metabolic process // inferred from electronic annotation///0006527 // arginine catabolic process // inferred from genetic interaction///0006560 // proline metabolic process // inferred from mutant phenotype///0006570 // tyrosine metabolic process // inferred from mutant phenotype///0006591 // ornithine metabolic pr…
255070_at	AT4G09020	ISA3	0.00307218	5.08286e-05	5.12887	0000272 // polysaccharide catabolic process // inferred from reviewed computational analysis///0005975 // carbohydrate metabolic process // inferred from electronic annotation///0005975 // carbohydrate metabolic process // inferred from sequence or structural similarity///0005982 // starch metabolic process // inferred from reviewed computational analysis///0005983 // starch catabolic process // …
255080_at	AT4G09030	AGP10	0.0147068	0.00253764	4.59332
254952_at	AT4G10955///AT4G10960	UGE5	0.00300045	3.97078e-05	8.33846	0005975 // carbohydrate metabolic process // inferred from electronic annotation///0006012 // galactose metabolic process // inferred from electronic annotation///0006629 // lipid metabolic process // inferred from electronic annotation///0006629 // lipid metabolic process // inferred from sequence or structural similarity///0016042 // lipid catabolic process // inferred from electronic annotatio…
254926_at	AT4G11280	ACS6	0.0270405	0.00763999	5.26873	0006952 // defense response // inferred from electronic annotation///0006979 // response to oxidative stress // inferred from expression pattern///0009058 // biosynthetic process // inferred from electronic annotation///0009611 // response to wounding // inferred from expression pattern///0009611 // response to wounding // inferred from reviewed computational analysis///0009612 // response to mec…
254833_s_at	AT4G12280///AT4G12290		0.00373017	0.000104721	18.1359	0009308 // amine metabolic process // inferred from electronic annotation///0055114 // oxidation-reduction process // inferred from electronic annotation
254823_at	AT4G12580		0.0231364	0.00582012	4.60902
254741_s_at	AT4G13900///AT4G13920	AtRLP49	0.00442372	0.000173661	8.04279	0006952 // defense response // inferred from sequence or structural similarity///0007165 // signal transduction // inferred by curator
245624_at	AT4G14090		0.00593962	0.000367744	9.96243	0008152 // metabolic process // inferred from electronic annotation///0009698 // phenylpropanoid metabolic process // inferred from electronic annotation///0009718 // anthocyanin-containing compound biosynthetic process // inferred from reviewed computational analysis///0009744 // response to sucrose stimulus // inferred from reviewed computational analysis///0010224 // response to UV-B // inferr…
245543_at	AT4G15260		0.0236667	0.00607252	3.91181	0008152 // metabolic process // inferred from electronic annotation///0019344 // cysteine biosynthetic process // inferred from reviewed computational analysis
245253_at	AT4G15440	HPL1	0.0269074	0.00756782	6.2167	0006569 // tryptophan catabolic process // inferred from reviewed computational analysis///0006631 // fatty acid metabolic process // inferred from sequence or structural similarity///0009611 // response to wounding // inferred from expression pattern///0009684 // indoleacetic acid biosynthetic process // inferred from reviewed computational analysis///0055114 // oxidation-reduction process // in…
245352_at	AT4G15490	UGT84A3	0.0154844	0.00280521	10.8511	0008152 // metabolic process // inferred from electronic annotation
245439_at	AT4G16670		0.00436849	0.000168428	3.80664	0007165 // signal transduction // inferred from sequence or structural similarity
245249_at	AT4G16760	ACX1	0.00652449	0.000454984	4.32032	0001676 // long-chain fatty acid metabolic process // inferred from mutant phenotype///0001676 // long-chain fatty acid metabolic process // inferred from reviewed computational analysis///0002213 // defense response to insect // inferred from genetic interaction///0002213 // defense response to insect // inferred from reviewed computational analysis///0006612 // protein targeting to membrane // …
245252_at	AT4G17500	ATERF-1	0.0205997	0.00477475	5.89063	0002679 // respiratory burst involved in defense response // inferred from reviewed computational analysis///0006351 // transcription, DNA-dependent // inferred from electronic annotation///0006355 // regulation of transcription, DNA-dependent // inferred from direct assay///0006355 // regulation of transcription, DNA-dependent // inferred from electronic annotation///0006952 // defense response …
245390_at	AT4G17650		0.0228523	0.0056962	3.46854	0015824 // proline transport // inferred from reviewed computational analysis///0016036 // cellular response to phosphate starvation // inferred from reviewed computational analysis///0019243 // methylglyoxal catabolic process to D-lactate // inferred from reviewed computational analysis///0019375 // galactolipid biosynthetic process // inferred from reviewed computational analysis///0042631 // c…
254707_at	AT4G18010	AT5PTASE2	0.00652449	0.000456462	6.40589	0007165 // signal transduction // inferred from reviewed computational analysis///0009414 // response to water deprivation // inferred from reviewed computational analysis///0009611 // response to wounding // inferred from reviewed computational analysis///0009723 // response to ethylene stimulus // inferred from reviewed computational analysis///0009733 // response to auxin stimulus // inferred …
254710_at	AT4G18050	PGP9	0.00856734	0.00082228	4.35201	0006200 // ATP catabolic process // inferred from electronic annotation///0006810 // transport // inferred from electronic annotation///0055085 // transmembrane transport // inferred from electronic annotation
254652_at	AT4G18170	WRKY28	0.0147763	0.00256239	9.45507	0006351 // transcription, DNA-dependent // inferred from electronic annotation///0006355 // regulation of transcription, DNA-dependent // inferred from electronic annotation///0006355 // regulation of transcription, DNA-dependent // inferred from sequence or structural similarity///0006865 // amino acid transport // inferred from reviewed computational analysis///0009407 // toxin catabolic proces…
254667_at	AT4G18280		0.00535506	0.000270784	12.0555
254630_at	AT4G18360		0.00300045	3.90053e-05	3.21256	0000041 // transition metal ion transport // inferred from reviewed computational analysis///0009853 // photorespiration // inferred from electronic annotation///0009854 // oxidative photosynthetic carbon pathway // inferred from electronic annotation///0010204 // defense response signaling pathway, resistance gene-independent // inferred from mutant phenotype///0042742 // defense response to bac…
254592_at	AT4G18880	HSF A4A	0.0262731	0.00723919	4.07723	0002679 // respiratory burst involved in defense response // inferred from reviewed computational analysis///0006351 // transcription, DNA-dependent // inferred from electronic annotation///0006355 // regulation of transcription, DNA-dependent // inferred from electronic annotation///0006950 // response to stress // inferred from electronic annotation///0009408 // response to heat // inferred fro…
254563_at	AT4G19120	ERD3	0.00666631	0.000484363	3.5099	0009269 // response to desiccation // inferred from reviewed computational analysis///0009409 // response to cold // inferred from reviewed computational analysis///0009651 // response to salt stress // inferred from reviewed computational analysis///0009737 // response to abscisic acid stimulus // inferred from reviewed computational analysis///0032259 // methylation // inferred from electronic …
254562_at	AT4G19230	CYP707A1	0.0152584	0.0027133	11.9098	0006950 // response to stress // inferred from electronic annotation///0009639 // response to red or far red light // inferred from expression pattern///0009687 // abscisic acid metabolic process // inferred from mutant phenotype///0046345 // abscisic acid catabolic process // inferred from electronic annotation///0048838 // release of seed from dormancy // inferred from mutant phenotype///005083…
254580_at	AT4G19390		0.00666776	0.000485215	3.13877
254574_at	AT4G19430		0.0295658	0.00894609	3.60215
254445_at	AT4G20930		0.0105831	0.0013149	3.8281	0006098 // pentose-phosphate shunt // inferred from electronic annotation///0006573 // valine metabolic process // inferred from electronic annotation///0006574 // valine catabolic process // inferred from electronic annotation///0009083 // branched-chain amino acid catabolic process // inferred from electronic annotation///0055114 // oxidation-reduction process // inferred from electronic annota…
254408_at	AT4G21390	B120	0.0259797	0.0070966	4.32355	0002679 // respiratory burst involved in defense response // inferred from reviewed computational analysis///0006468 // protein phosphorylation // inferred from electronic annotation///0006612 // protein targeting to membrane // inferred from reviewed computational analysis///0006944 // cellular membrane fusion // inferred from reviewed computational analysis///0006979 // response to oxidative st…
254413_at	AT4G21440	ATMYB102	0.0153163	0.00274817	7.7273	0006355 // regulation of transcription, DNA-dependent // traceable author statement///0006970 // response to osmotic stress // inferred from expression pattern///0007165 // signal transduction // inferred from reviewed computational analysis///0009414 // response to water deprivation // inferred from reviewed computational analysis///0009611 // response to wounding // inferred from expression pat…
254393_at	AT4G21580		0.00305702	4.28545e-05	4.69945	0009610 // response to symbiotic fungus // inferred from reviewed computational analysis///0055114 // oxidation-reduction process // inferred from electronic annotation
254396_at	AT4G21680	NRT1.8	0.00221523	2.41686e-06	281.276	0006810 // transport // inferred from electronic annotation///0006857 // oligopeptide transport // inferred from electronic annotation///0006857 // oligopeptide transport // inferred from sequence or structural similarity///0010167 // response to nitrate // inferred from expression pattern///0015706 // nitrate transport // inferred from direct assay///0042128 // nitrate assimilation // inferred f…
254385_s_at	AT4G21830///AT4G21840	ATMSRB7	0.00682807	0.000505766	7.9091	0000304 // response to singlet oxygen // inferred from expression pattern///0055114 // oxidation-reduction process // inferred from electronic annotation
254389_s_at	AT4G21903///AT4G21910		0.00413899	0.000145813	3.64064	0006855 // drug transmembrane transport // inferred from electronic annotation///0055085 // transmembrane transport // inferred from electronic annotation
254314_at	AT4G22470		0.00695418	0.00052851	7.43654	0006508 // proteolysis // inferred from electronic annotation///0006865 // amino acid transport // inferred from reviewed computational analysis///0006869 // lipid transport // inferred from electronic annotation///0006869 // lipid transport // inferred from sequence or structural similarity///0015824 // proline transport // inferred from reviewed computational analysis
254318_at	AT4G22530		0.0069516	0.000527817	5.91915	0002679 // respiratory burst involved in defense response // inferred from reviewed computational analysis///0008152 // metabolic process // inferred from electronic annotation///0010200 // response to chitin // inferred from reviewed computational analysis///0030968 // endoplasmic reticulum unfolded protein response // inferred from reviewed computational analysis///0032259 // methylation // inf…
254321_at	AT4G22590///AT4G22592	CPuORF27	0.00412632	0.000142578	5.6879	0005992 // trehalose biosynthetic process // inferred from electronic annotation///0005992 // trehalose biosynthetic process // inferred from sequence or structural similarity///0006950 // response to stress // inferred from electronic annotation///0008152 // metabolic process // inferred from electronic annotation
254326_at	AT4G22610		0.0100197	0.00115416	5.84504	0006869 // lipid transport // inferred from electronic annotation///0006869 // lipid transport // inferred from sequence or structural similarity
254283_s_at	AT4G22870///AT4G22880	LDOX	0.00307218	5.3562e-05	10.0193	0007033 // vacuole organization // inferred from mutant phenotype///0009611 // response to wounding // inferred from expression pattern///0009718 // anthocyanin-containing compound biosynthetic process // traceable author statement///0009753 // response to jasmonic acid stimulus // inferred from expression pattern///0009813 // flavonoid biosynthetic process // inferred from electronic annotation/…
254291_at	AT4G23010	UTR2	0.0163486	0.00312592	3.21349	0006810 // transport // inferred from electronic annotation///0008643 // carbohydrate transport // inferred from electronic annotation///0055085 // transmembrane transport // inferred from electronic annotation///0072334 // UDP-galactose transmembrane transport // inferred from direct assay
254232_at	AT4G23600	CORI3	0.00263763	1.40642e-05	36.5103	0000096 // sulfur amino acid metabolic process // inferred from reviewed computational analysis///0006520 // cellular amino acid metabolic process // inferred from electronic annotation///0006520 // cellular amino acid metabolic process // inferred from expression pattern///0006546 // glycine catabolic process // inferred from reviewed computational analysis///0006636 // unsaturated fatty acid bi…
254185_at	AT4G23990	CSLG3	0.0053341	0.000266925	5.0071	0000271 // polysaccharide biosynthetic process // inferred from sequence or structural similarity///0030244 // cellulose biosynthetic process // inferred from electronic annotation
254158_at	AT4G24380		0.0127724	0.00195064	13.9729	0009611 // response to wounding // inferred from reviewed computational analysis///0009620 // response to fungus // inferred from reviewed computational analysis///0009693 // ethylene biosynthetic process // inferred from reviewed computational analysis///0009695 // jasmonic acid biosynthetic process // inferred from reviewed computational analysis///0009753 // response to jasmonic acid stimulus …
254108_at	AT4G25230	RIN2	0.0236667	0.00606378	3.34711	0006952 // defense response // inferred from electronic annotation///0009626 // plant-type hypersensitive response // inferred from electronic annotation///0016567 // protein ubiquitination // inferred from electronic annotation///0034052 // positive regulation of plant-type hypersensitive response // inferred from genetic interaction
254063_at	AT4G25390		0.0192861	0.00420637	3.23926	0006468 // protein phosphorylation // inferred from electronic annotation///0006612 // protein targeting to membrane // inferred from reviewed computational analysis///0009407 // toxin catabolic process // inferred from reviewed computational analysis///0009693 // ethylene biosynthetic process // inferred from reviewed computational analysis///0009863 // salicylic acid mediated signaling pathway …
254042_at	AT4G25810	XTR6	0.00703308	0.000547158	33.4318	0005975 // carbohydrate metabolic process // inferred from electronic annotation///0006073 // cellular glucan metabolic process // inferred from electronic annotation///0008152 // metabolic process // inferred from electronic annotation
253987_at	AT4G26270	PFK3	0.00508159	0.000235798	5.28509	0006002 // fructose 6-phosphate metabolic process // inferred from electronic annotation///0006096 // glycolysis // inferred from direct assay///0006096 // glycolysis // inferred from sequence or structural similarity///0010053 // root epidermal cell differentiation // inferred from mutant phenotype///0016310 // phosphorylation // inferred from electronic annotation
253937_at	AT4G26890	MAPKKK16	0.00343175	7.50981e-05	5.0674	0006468 // protein phosphorylation // inferred from electronic annotation///0016310 // phosphorylation // inferred from electronic annotation///0046777 // protein autophosphorylation // inferred from direct assay
253872_at	AT4G27410	RD26	0.0174117	0.00352798	5.49964	0006351 // transcription, DNA-dependent // inferred from electronic annotation///0006355 // regulation of transcription, DNA-dependent // inferred from electronic annotation///0007165 // signal transduction // inferred from reviewed computational analysis///0007275 // multicellular organismal development // inferred from sequence or structural similarity///0009409 // response to cold // inferred …
253879_s_at	AT4G27560///AT4G27570		0.00619891	0.000404931	3.29887	0008152 // metabolic process // inferred from electronic annotation
253890_s_at	AT4G27585///AT5G54100		0.00221523	1.89773e-06	3.40813
253841_at	AT4G27830	BGLU10	0.00667726	0.00048732	5.92328	0005975 // carbohydrate metabolic process // inferred from electronic annotation///0008152 // metabolic process // inferred from electronic annotation///0009610 // response to symbiotic fungus // inferred from reviewed computational analysis///0046283 // anthocyanin-containing compound metabolic process // inferred from mutant phenotype
253824_at	AT4G27940	MTM1	0.0057916	0.000344906	3.5441	0006810 // transport // inferred from sequence or structural similarity///0006828 // manganese ion transport // inferred from sequence or structural similarity///0006839 // mitochondrial transport // inferred from sequence or structural similarity///1901562 // response to paraquat // inferred from expression pattern
253828_at	AT4G27970	SLAH2	0.00857141	0.000823772	3.02026	0006810 // transport // inferred from electronic annotation///0006811 // ion transport // inferred from electronic annotation///0055085 // transmembrane transport // inferred from electronic annotation
253776_at	AT4G28390	AAC3	0.00307218	5.39606e-05	4.57608	0006810 // transport // inferred from electronic annotation///0006810 // transport // inferred from sequence or structural similarity///0006839 // mitochondrial transport // inferred from sequence or structural similarity///0009627 // systemic acquired resistance // inferred from reviewed computational analysis///0015865 // purine nucleotide transport // inferred from direct assay///0034976 // re…
253796_at	AT4G28460		0.0152584	0.00271162	27.3371
253666_at	AT4G30270	MERI5B	0.0220173	0.00534378	3.50836	0005975 // carbohydrate metabolic process // inferred from electronic annotation///0006073 // cellular glucan metabolic process // inferred from electronic annotation///0007568 // aging // inferred from expression pattern///0008152 // metabolic process // inferred from electronic annotation///0009739 // response to gibberellin stimulus // inferred from genetic interaction///0009740 // gibberellic…
253628_at	AT4G30280	XTH18	0.00909689	0.000942664	8.8942	0005975 // carbohydrate metabolic process // inferred from electronic annotation///0006073 // cellular glucan metabolic process // inferred from electronic annotation///0008152 // metabolic process // inferred from electronic annotation///0010411 // xyloglucan metabolic process // inferred from direct assay
253608_at	AT4G30290	XTH19	0.0255294	0.00688994	3.57189	0005975 // carbohydrate metabolic process // inferred from electronic annotation///0006073 // cellular glucan metabolic process // inferred from electronic annotation///0008152 // metabolic process // inferred from electronic annotation///0010411 // xyloglucan metabolic process // inferred from direct assay
253571_at	AT4G31000		0.00259785	1.0481e-05	6.31072
253522_at	AT4G31290		0.00778771	0.000674556	3.22088
253485_at	AT4G31800	WRKY18	0.00864972	0.000854366	4.62698	0002237 // response to molecule of bacterial origin // inferred from mutant phenotype///0006351 // transcription, DNA-dependent // inferred from electronic annotation///0006355 // regulation of transcription, DNA-dependent // inferred from electronic annotation///0006355 // regulation of transcription, DNA-dependent // inferred from sequence or structural similarity///0009751 // response to salic…
253453_at	AT4G31860		0.00305702	4.39687e-05	3.77519	0006470 // protein dephosphorylation // inferred from electronic annotation///0009610 // response to symbiotic fungus // inferred from reviewed computational analysis///0016036 // cellular response to phosphate starvation // inferred from reviewed computational analysis///0019375 // galactolipid biosynthetic process // inferred from reviewed computational analysis///0042631 // cellular response t…
253496_at	AT4G31870	ATGPX7	0.00307218	5.09283e-05	3.49113	0006979 // response to oxidative stress // inferred from electronic annotation///0009407 // toxin catabolic process // inferred from reviewed computational analysis///0055114 // oxidation-reduction process // inferred from electronic annotation///0080167 // response to karrikin // inferred from expression pattern
253405_at	AT4G32800		0.00560606	0.000308657	7.92971	0006351 // transcription, DNA-dependent // inferred from electronic annotation///0006355 // regulation of transcription, DNA-dependent // inferred from electronic annotation///0006355 // regulation of transcription, DNA-dependent // inferred from sequence or structural similarity///0009873 // ethylene mediated signaling pathway // inferred from electronic annotation
253373_at	AT4G33150		0.00578777	0.000344306	4.34627	0008152 // metabolic process // inferred from electronic annotation///0009744 // response to sucrose stimulus // inferred from reviewed computational analysis///0009750 // response to fructose stimulus // inferred from reviewed computational analysis///0010228 // vegetative to reproductive phase transition of meristem // inferred from reviewed computational analysis///0016926 // protein desumoyla…
253343_at	AT4G33540		0.0119207	0.00170988	8.42208	0008152 // metabolic process // inferred from sequence or structural similarity///0046685 // response to arsenic-containing substance // inferred from expression pattern
253344_at	AT4G33550		0.00343175	7.44093e-05	18.3349	0006869 // lipid transport // inferred from sequence or structural similarity
253292_at	AT4G33985		0.0154307	0.00278025	3.6134	0010286 // heat acclimation // inferred from reviewed computational analysis
253277_at	AT4G34230	ATCAD5	0.00623899	0.00041175	3.26838	0006612 // protein targeting to membrane // inferred from reviewed computational analysis///0006865 // amino acid transport // inferred from reviewed computational analysis///0009611 // response to wounding // inferred from reviewed computational analysis///0009699 // phenylpropanoid biosynthetic process // inferred from electronic annotation///0009805 // coumarin biosynthetic process // inferred…
253245_at	AT4G34590	GBF6	0.0208767	0.00489528	4.29566	0006355 // regulation of transcription, DNA-dependent // inferred from electronic annotation///0006355 // regulation of transcription, DNA-dependent // inferred from sequence or structural similarity///0009410 // response to xenobiotic stimulus // inferred from reviewed computational analysis///0009744 // response to sucrose stimulus // inferred from expression pattern///0017148 // negative regul…
253203_at	AT4G34710	ADC2	0.0203774	0.00465437	5.53955	0006527 // arginine catabolic process // inferred from electronic annotation///0006596 // polyamine biosynthetic process // inferred from mutant phenotype///0006612 // protein targeting to membrane // inferred from reviewed computational analysis///0006970 // response to osmotic stress // inferred from mutant phenotype///0006979 // response to oxidative stress // inferred from expression pattern/…
253215_at	AT4G34950		0.00437855	0.000170635	10.563	0007623 // circadian rhythm // inferred from reviewed computational analysis///0019761 // glucosinolate biosynthetic process // inferred from reviewed computational analysis
253173_at	AT4G35110		0.0315961	0.00999074	3.00891	0043090 // amino acid import // inferred from reviewed computational analysis///0080167 // response to karrikin // inferred from expression pattern
253104_at	AT4G36010		0.018938	0.00408656	7.06872	0051707 // response to other organism // inferred from sequence or structural similarity
246214_at	AT4G36990	HSF4	0.0194875	0.00429726	3.35038	0006351 // transcription, DNA-dependent // inferred from electronic annotation///0006355 // regulation of transcription, DNA-dependent // inferred from electronic annotation///0006950 // response to stress // inferred from electronic annotation///0006984 // ER-nucleus signaling pathway // inferred from reviewed computational analysis///0009407 // toxin catabolic process // inferred from reviewed …
253044_at	AT4G37290		0.0171602	0.00343844	7.54881	0009693 // ethylene biosynthetic process // inferred from reviewed computational analysis///0009723 // response to ethylene stimulus // inferred from reviewed computational analysis///0080167 // response to karrikin // inferred from expression pattern
253046_at	AT4G37370	CYP81D8	0.0153924	0.0027658	70.5879	0009723 // response to ethylene stimulus // inferred from reviewed computational analysis///0010286 // heat acclimation // inferred from reviewed computational analysis///0055114 // oxidation-reduction process // inferred from electronic annotation///0080167 // response to karrikin // inferred from expression pattern
253059_s_at	AT4G37680///AT4G38320	HHP5	0.0029132	3.06929e-05	3.15628	0009725 // response to hormone stimulus // inferred from expression pattern///0009744 // response to sucrose stimulus // inferred from expression pattern
253012_at	AT4G37900		0.00285464	2.45551e-05	14.0568	0006865 // amino acid transport // inferred from reviewed computational analysis
252983_at	AT4G37980	ELI3-1	0.00285464	1.98015e-05	3.13566	0009617 // response to bacterium // inferred from expression pattern///0009626 // plant-type hypersensitive response // inferred from genetic interaction///0009699 // phenylpropanoid biosynthetic process // inferred from electronic annotation///0009809 // lignin biosynthetic process // inferred from expression pattern///0055114 // oxidation-reduction process // inferred from electronic annotation
252997_at	AT4G38400	ATEXLA2	0.00458482	0.000186444	7.5716	0009664 // plant-type cell wall organization // inferred from sequence or structural similarity///0009826 // unidimensional cell growth // non-traceable author statement///0009828 // plant-type cell wall loosening // non-traceable author statement///0019953 // sexual reproduction // inferred from electronic annotation
252921_at	AT4G39030	EDS5	0.00343175	8.51896e-05	4.22098	0000096 // sulfur amino acid metabolic process // inferred from reviewed computational analysis///0000165 // MAPK cascade // inferred from reviewed computational analysis///0006520 // cellular amino acid metabolic process // inferred from reviewed computational analysis///0006546 // glycine catabolic process // inferred from reviewed computational analysis///0006612 // protein targeting to membra…
252888_at	AT4G39210	APL3	0.00300045	3.96032e-05	29.048	0005978 // glycogen biosynthetic process // inferred from electronic annotation///0008152 // metabolic process // inferred from electronic annotation///0009058 // biosynthetic process // inferred from electronic annotation///0009853 // photorespiration // inferred from reviewed computational analysis///0019252 // starch biosynthetic process // inferred from reviewed computational analysis///00192…
252908_at	AT4G39670		0.019201	0.00416567	21.9329	0002679 // respiratory burst involved in defense response // inferred from reviewed computational analysis///0006612 // protein targeting to membrane // inferred from reviewed computational analysis///0006984 // ER-nucleus signaling pathway // inferred from reviewed computational analysis///0009697 // salicylic acid biosynthetic process // inferred from reviewed computational analysis///0009723 /…
252827_at	AT4G39950	CYP79B2	0.0225951	0.00558128	3.55403	0002229 // defense response to oomycetes // inferred from genetic interaction///0006569 // tryptophan catabolic process // inferred from direct assay///0006569 // tryptophan catabolic process // inferred from reviewed computational analysis///0006952 // defense response // inferred from mutant phenotype///0009414 // response to water deprivation // inferred from expression pattern///0009617 // re…
252822_at	AT4G39955		0.00571238	0.000329482	3.83012	0008152 // metabolic process // inferred from electronic annotation
251096_at	AT5G01550	LECRKA4.2	0.00996528	0.00113827	3.31329	0006468 // protein phosphorylation // inferred from electronic annotation///0009738 // abscisic acid mediated signaling pathway // inferred from mutant phenotype///0009845 // seed germination // inferred from mutant phenotype///0010200 // response to chitin // inferred from reviewed computational analysis///0016310 // phosphorylation // inferred from electronic annotation
251060_at	AT5G01820	ATSR1	0.0195659	0.00432189	4.96412	0006468 // protein phosphorylation // inferred from electronic annotation///0007165 // signal transduction // inferred from electronic annotation///0010118 // stomatal movement // inferred from reviewed computational analysis///0016310 // phosphorylation // inferred from electronic annotation///0019722 // calcium-mediated signaling // inferred from reviewed computational analysis
251028_at	AT5G02230		0.00782865	0.000682982	4.04345	0008152 // metabolic process // inferred from electronic annotation
250948_at	AT5G03490		0.00870625	0.000863018	3.67272	0008152 // metabolic process // inferred from electronic annotation
245699_at	AT5G04250		0.0131973	0.0020886	3.28202	0006508 // proteolysis // inferred from electronic annotation///0009611 // response to wounding // inferred from reviewed computational analysis///0009620 // response to fungus // inferred from reviewed computational analysis///0009695 // jasmonic acid biosynthetic process // inferred from reviewed computational analysis///0009753 // response to jasmonic acid stimulus // inferred from reviewed co…
250811_at	AT5G05110		0.00473541	0.000201695	4.09071	0006952 // defense response // inferred from electronic annotation///0010466 // negative regulation of peptidase activity // inferred from electronic annotation
250781_at	AT5G05410	DREB2A	0.00418653	0.00014888	9.12412	0006351 // transcription, DNA-dependent // inferred from electronic annotation///0006355 // regulation of transcription, DNA-dependent // inferred from electronic annotation///0006355 // regulation of transcription, DNA-dependent // inferred from sequence or structural similarity///0006457 // protein folding // inferred from reviewed computational analysis///0006950 // response to stress // infer…
250793_at	AT5G05600		0.00862676	0.000842392	16.9619	0009611 // response to wounding // inferred from reviewed computational analysis///0009620 // response to fungus // inferred from reviewed computational analysis///0009695 // jasmonic acid biosynthetic process // inferred from reviewed computational analysis///0009753 // response to jasmonic acid stimulus // inferred from reviewed computational analysis///0009867 // jasmonic acid mediated signali…
250722_at	AT5G06190		0.00349795	9.17074e-05	7.47979
250676_at	AT5G06320	NHL3	0.0294928	0.00886907	4.89175	0009617 // response to bacterium // inferred from expression pattern///0042742 // defense response to bacterium // inferred from mutant phenotype///0051607 // defense response to virus // inferred from expression pattern
250669_at	AT5G06870	PGIP2	0.00285464	1.93009e-05	10.1262	0000165 // MAPK cascade // inferred from reviewed computational analysis///0006355 // regulation of transcription, DNA-dependent // inferred from reviewed computational analysis///0006612 // protein targeting to membrane // inferred from reviewed computational analysis///0006952 // defense response // inferred from sequence or structural similarity///0007165 // signal transduction // inferred by …
250662_at	AT5G07010	ST2A	0.0116875	0.00161912	8.6987	0009611 // response to wounding // inferred from reviewed computational analysis///0009694 // jasmonic acid metabolic process // inferred from direct assay///0009694 // jasmonic acid metabolic process // inferred from reviewed computational analysis///0009695 // jasmonic acid biosynthetic process // inferred from reviewed computational analysis///0009753 // response to jasmonic acid stimulus // i…
246055_at	AT5G08380	AtAGAL1	0.00343175	8.40924e-05	6.30447	0005975 // carbohydrate metabolic process // inferred from electronic annotation///0008152 // metabolic process // inferred from electronic annotation///0009311 // oligosaccharide metabolic process // not recorded///0016139 // glycoside catabolic process // not recorded///0046477 // glycosylceramide catabolic process // not recorded
250515_at	AT5G09570		0.00972707	0.00108856	6.36281	0016036 // cellular response to phosphate starvation // inferred from reviewed computational analysis///0019375 // galactolipid biosynthetic process // inferred from reviewed computational analysis///0045892 // negative regulation of transcription, DNA-dependent // inferred from reviewed computational analysis
250455_at	AT5G09980	PROPEP4	0.0227051	0.00563034	10.7198	0006952 // defense response // inferred from electronic annotation///0009753 // response to jasmonic acid stimulus // inferred from expression pattern
250435_at	AT5G10380	RING1	0.018339	0.00384546	5.20999	0000165 // MAPK cascade // inferred from reviewed computational analysis///0002238 // response to molecule of fungal origin // inferred from expression pattern///0006355 // regulation of transcription, DNA-dependent // inferred from reviewed computational analysis///0006612 // protein targeting to membrane // inferred from reviewed computational analysis///0006915 // apoptotic process // inferred…
250445_at	AT5G10760		0.0108387	0.00138441	9.57548	0000165 // MAPK cascade // inferred from reviewed computational analysis///0006508 // proteolysis // inferred from electronic annotation///0006508 // proteolysis // inferred from sequence or structural similarity///0009627 // systemic acquired resistance // inferred from reviewed computational analysis///0009814 // defense response, incompatible interaction // inferred from reviewed computational…
250365_at	AT5G11410		0.00307218	5.2085e-05	5.77479	0006468 // protein phosphorylation // inferred from electronic annotation///0016310 // phosphorylation // inferred from electronic annotation
250385_at	AT5G11520	ASP3	0.00285464	1.89562e-05	3.01506	0006103 // 2-oxoglutarate metabolic process // inferred from sequence or structural similarity///0006520 // cellular amino acid metabolic process // inferred from electronic annotation///0006531 // aspartate metabolic process // inferred from sequence or structural similarity///0006536 // glutamate metabolic process // inferred from sequence or structural similarity///0006635 // fatty acid beta-o…
250350_at	AT5G12010		0.00654607	0.000459646	4.91486	0015824 // proline transport // inferred from reviewed computational analysis
245209_at	AT5G12340		0.0142159	0.00239367	19.6266
250264_at	AT5G12890		0.00259785	1.04123e-05	4.03431	0008152 // metabolic process // inferred from electronic annotation
245976_at	AT5G13080	WRKY75	0.00543302	0.000284454	19.7114	0006351 // transcription, DNA-dependent // inferred from electronic annotation///0006355 // regulation of transcription, DNA-dependent // inferred from electronic annotation///0006355 // regulation of transcription, DNA-dependent // inferred from sequence or structural similarity///0009723 // response to ethylene stimulus // inferred from reviewed computational analysis///0016036 // cellular resp…
250292_at	AT5G13220	JAZ10	0.00285464	2.24782e-05	34.3456	0006351 // transcription, DNA-dependent // inferred from electronic annotation///0006355 // regulation of transcription, DNA-dependent // inferred from electronic annotation///0006952 // defense response // inferred from electronic annotation///0007165 // signal transduction // inferred from reviewed computational analysis///0009414 // response to water deprivation // inferred from reviewed compu…
250287_at	AT5G13330	Rap2.6L	0.0207157	0.00482706	9.61221	0006351 // transcription, DNA-dependent // inferred from electronic annotation///0006355 // regulation of transcription, DNA-dependent // inferred from electronic annotation///0006355 // regulation of transcription, DNA-dependent // inferred from sequence or structural similarity///0009407 // toxin catabolic process // inferred from reviewed computational analysis///0009414 // response to water d…
250293_s_at	AT5G13360///AT5G13370		0.00824488	0.000761899	3.19555	0009733 // response to auxin stimulus // inferred from sequence or structural similarity
245854_at	AT5G13490	AAC2	0.00285464	2.18112e-05	6.01019	0006094 // gluconeogenesis // inferred from reviewed computational analysis///0006612 // protein targeting to membrane // inferred from reviewed computational analysis///0006810 // transport // inferred from electronic annotation///0006810 // transport // inferred from sequence or structural similarity///0006820 // anion transport // inferred from reviewed computational analysis///0006862 // nucl…
245855_at	AT5G13550	SULTR4;1	0.00285464	1.99745e-05	4.8206	0006810 // transport // inferred from electronic annotation///0006950 // response to stress // inferred from electronic annotation///0008272 // sulfate transport // inferred from electronic annotation///0055085 // transmembrane transport // inferred from electronic annotation
250252_at	AT5G13750	ZIFL1	0.0295015	0.00888264	3.72805	0006810 // transport // inferred from electronic annotation///0009414 // response to water deprivation // inferred from mutant phenotype///0009630 // gravitropism // inferred from mutant phenotype///0010540 // basipetal auxin transport // inferred from direct assay///0048364 // root development // inferred from mutant phenotype///0055085 // transmembrane transport // inferred from electronic anno…
250151_at	AT5G14570	ATNRT2.7	0.00667726	0.000487269	3.71955	0015706 // nitrate transport // inferred from direct assay///0015706 // nitrate transport // inferred from reviewed computational analysis///0042128 // nitrate assimilation // inferred from electronic annotation///0055085 // transmembrane transport // inferred from electronic annotation
250149_at	AT5G14700		0.0135349	0.00218396	5.29353	0009809 // lignin biosynthetic process // inferred from sequence or structural similarity///0044237 // cellular metabolic process // inferred from electronic annotation
246584_at	AT5G14730		0.0053341	0.000266686	5.30518	0009407 // toxin catabolic process // inferred from reviewed computational analysis///0010583 // response to cyclopentenone // inferred from reviewed computational analysis
246595_at	AT5G14780	FDH	0.00684101	0.000508922	4.40743	0008152 // metabolic process // inferred from electronic annotation///0009611 // response to wounding // inferred from direct assay///0046686 // response to cadmium ion // inferred from expression pattern///0055114 // oxidation-reduction process // inferred from electronic annotation
246550_at	AT5G14920		0.0148214	0.00257275	3.2697	0009651 // response to salt stress // inferred from mutant phenotype///0009737 // response to abscisic acid stimulus // inferred from mutant phenotype///0009739 // response to gibberellin stimulus // inferred from sequence or structural similarity///0009740 // gibberellic acid mediated signaling pathway // inferred from electronic annotation///2000377 // regulation of reactive oxygen species meta…
246481_s_at	AT5G15960///AT5G15970	KIN1	0.00285464	2.44079e-05	8.08967	0006950 // response to stress // inferred from electronic annotation///0006970 // response to osmotic stress // inferred from expression pattern///0006970 // response to osmotic stress // inferred from genetic interaction///0009409 // response to cold // inferred from expression pattern///0009409 // response to cold // non-traceable author statement///0009414 // response to water deprivation // i…
246488_at	AT5G16010		0.00843218	0.00079414	3.62432	0006629 // lipid metabolic process // inferred from electronic annotation
250129_at	AT5G16450		0.00402083	0.000129084	4.67181	0051252 // regulation of RNA metabolic process // inferred from electronic annotation
250083_at	AT5G17220	ATGSTF12	0.00363692	9.98674e-05	9.35995	0006950 // response to stress // inferred from electronic annotation///0009407 // toxin catabolic process // inferred from reviewed computational analysis///0009407 // toxin catabolic process // traceable author statement///0009636 // response to toxic substance // inferred from electronic annotation///0009718 // anthocyanin-containing compound biosynthetic process // inferred from reviewed compu…
250094_at	AT5G17380		0.0041208	0.00013766	6.48782	0009407 // toxin catabolic process // inferred from reviewed computational analysis///0010583 // response to cyclopentenone // inferred from reviewed computational analysis///0046482 // para-aminobenzoic acid metabolic process // inferred from reviewed computational analysis
250062_at	AT5G17760		0.0180197	0.00373799	5.18451	0009627 // systemic acquired resistance // inferred from reviewed computational analysis///0009697 // salicylic acid biosynthetic process // inferred from reviewed computational analysis
250054_at	AT5G17860	CAX7	0.0253836	0.00682777	4.73011	0006810 // transport // inferred from electronic annotation///0006811 // ion transport // inferred from electronic annotation///0006812 // cation transport // inferred from sequence or structural similarity///0006813 // potassium ion transport // inferred from electronic annotation///0006814 // sodium ion transport // inferred from electronic annotation///0010260 // organ senescence // inferred f…
250024_at	AT5G18270	ANAC087	0.00285464	2.80189e-05	3.80863	0006355 // regulation of transcription, DNA-dependent // inferred from electronic annotation///0007275 // multicellular organismal development // inferred from sequence or structural similarity
250025_at	AT5G18290	SIP1;2	0.0118497	0.00169151	4.27908	0006810 // transport // inferred from electronic annotation///0046685 // response to arsenic-containing substance // inferred from reviewed computational analysis
249971_at	AT5G19110		0.00742064	0.000602803	26.9682	0006508 // proteolysis // inferred from electronic annotation
246042_at	AT5G19440		0.00259785	1.0578e-05	5.16461	0044237 // cellular metabolic process // inferred from electronic annotation///0046482 // para-aminobenzoic acid metabolic process // inferred from reviewed computational analysis
246071_at	AT5G20150	SPX1	0.00498622	0.000226229	7.22634	0006817 // phosphate ion transport // inferred from reviewed computational analysis///0016036 // cellular response to phosphate starvation // inferred from expression pattern///0016036 // cellular response to phosphate starvation // inferred from reviewed computational analysis///0019375 // galactolipid biosynthetic process // inferred from reviewed computational analysis///0045892 // negative re…
246099_at	AT5G20230	ATBCB	0.0231483	0.00583986	8.42614	0006979 // response to oxidative stress // inferred from reviewed computational analysis///0006979 // response to oxidative stress // traceable author statement///0009611 // response to wounding // inferred from expression pattern///0009611 // response to wounding // inferred from reviewed computational analysis///0009620 // response to fungus // inferred from reviewed computational analysis///00…
246075_at	AT5G20410	MGD2	0.00535506	0.00027192	6.0366	0005975 // carbohydrate metabolic process // inferred from electronic annotation///0006631 // fatty acid metabolic process // inferred from genetic interaction///0009247 // glycolipid biosynthetic process // inferred from electronic annotation///0016036 // cellular response to phosphate starvation // inferred from expression pattern///0016036 // cellular response to phosphate starvation // inferr…
246082_at	AT5G20480	EFR	0.00601355	0.000381119	5.7923	0000165 // MAPK cascade // inferred from reviewed computational analysis///0002764 // immune response-regulating signaling pathway // inferred from mutant phenotype///0006468 // protein phosphorylation // inferred from electronic annotation///0006468 // protein phosphorylation // inferred from sequence or structural similarity///0006612 // protein targeting to membrane // inferred from reviewed c…
249917_at	AT5G22460		0.00515404	0.000248616	12.1159
249890_at	AT5G22570	WRKY38	0.0265865	0.00739557	6.03173	0000165 // MAPK cascade // inferred from reviewed computational analysis///0006351 // transcription, DNA-dependent // inferred from electronic annotation///0006355 // regulation of transcription, DNA-dependent // inferred from electronic annotation///0006355 // regulation of transcription, DNA-dependent // inferred from sequence or structural similarity///0006355 // regulation of transcription, D…
249860_at	AT5G22860		0.00960888	0.00106422	8.27644	0006508 // proteolysis // inferred from electronic annotation
249791_at	AT5G23810	AAP7	0.0213772	0.00509229	3.0408	0006810 // transport // inferred from electronic annotation///0006865 // amino acid transport // inferred from sequence or structural similarity
249806_at	AT5G23850		0.00347376	8.98842e-05	5.77548
249765_at	AT5G24030	SLAH3	0.0115204	0.0015742	13.4417	0006598 // polyamine catabolic process // inferred from reviewed computational analysis///0006810 // transport // inferred from electronic annotation///0006811 // ion transport // inferred from electronic annotation///0006873 // cellular ion homeostasis // inferred from mutant phenotype///0009698 // phenylpropanoid metabolic process // inferred from reviewed computational analysis///0010167 // re…
249774_at	AT5G24150	SQP1	0.0170723	0.00339472	3.04905	0008152 // metabolic process // inferred from electronic annotation///0016126 // sterol biosynthetic process // inferred from reviewed computational analysis///0016126 // sterol biosynthetic process // traceable author statement///0019745 // pentacyclic triterpenoid biosynthetic process // inferred from reviewed computational analysis///0055114 // oxidation-reduction process // inferred from elec…
249775_at	AT5G24160	SQE6	0.0221446	0.00539175	3.06502	0008152 // metabolic process // inferred from electronic annotation///0016126 // sterol biosynthetic process // inferred from reviewed computational analysis///0016126 // sterol biosynthetic process // traceable author statement///0019745 // pentacyclic triterpenoid biosynthetic process // inferred from reviewed computational analysis///0055114 // oxidation-reduction process // inferred from elec…
249777_at	AT5G24210		0.0167681	0.00327543	3.20358	0002237 // response to molecule of bacterial origin // inferred from reviewed computational analysis///0006629 // lipid metabolic process // inferred from electronic annotation///0006629 // lipid metabolic process // inferred from sequence or structural similarity///0009627 // systemic acquired resistance // inferred from reviewed computational analysis///0009697 // salicylic acid biosynthetic pr…
249732_at	AT5G24420	PGL5	0.00597171	0.000374505	16.3499	0005975 // carbohydrate metabolic process // inferred from electronic annotation///0006098 // pentose-phosphate shunt // inferred from electronic annotation
249754_at	AT5G24530	DMR6	0.0039313	0.000118954	3.84713	0000165 // MAPK cascade // inferred from reviewed computational analysis///0001666 // response to hypoxia // inferred from reviewed computational analysis///0006612 // protein targeting to membrane // inferred from reviewed computational analysis///0009595 // detection of biotic stimulus // inferred from reviewed computational analysis///0009617 // response to bacterium // inferred from genetic i…
249747_at	AT5G24600		0.00631293	0.000422135	5.97705
249752_at	AT5G24660	LSU2	0.0275207	0.0078517	16.2904	0009658 // chloroplast organization // inferred from mutant phenotype///0031347 // regulation of defense response // inferred from mutant phenotype///0045893 // positive regulation of transcription, DNA-dependent // inferred from mutant phenotype
245928_s_at	AT5G24770///AT5G24780	VSP1	0.0051073	0.000239342	25.2292	0002213 // defense response to insect // inferred from direct assay///0006952 // defense response // inferred from expression pattern///0006979 // response to oxidative stress // inferred from expression pattern///0009611 // response to wounding // inferred from expression pattern///0009625 // response to insect // inferred from expression pattern///0009753 // response to jasmonic acid stimulus /…
246932_at	AT5G25190		0.00307218	5.04886e-05	7.85187	0006351 // transcription, DNA-dependent // inferred from electronic annotation///0006355 // regulation of transcription, DNA-dependent // inferred from electronic annotation///0006355 // regulation of transcription, DNA-dependent // inferred from sequence or structural similarity///0009740 // gibberellic acid mediated signaling pathway // inferred from reviewed computational analysis///0009873 //…
246944_at	AT5G25450		0.00535506	0.000273729	3.08568	0006122 // mitochondrial electron transport, ubiquinol to cytochrome c // inferred from electronic annotation///0006122 // mitochondrial electron transport, ubiquinol to cytochrome c // inferred from sequence or structural similarity///0055114 // oxidation-reduction process // inferred from electronic annotation
246884_at	AT5G26220		0.016543	0.0031851	18.9926	0010288 // response to lead ion // inferred from expression pattern///0046686 // response to cadmium ion // inferred from expression pattern
246831_at	AT5G26340	MSS1	0.0289258	0.0085689	16.8788	0006810 // transport // inferred from electronic annotation///0008643 // carbohydrate transport // inferred from electronic annotation///0009414 // response to water deprivation // inferred from expression pattern///0009651 // response to salt stress // inferred from expression pattern///0009737 // response to abscisic acid stimulus // inferred from expression pattern///0015749 // monosaccharide …
246796_at	AT5G26770		0.00307218	5.43153e-05	3.66337
246779_at	AT5G27520	PNC2	0.00413899	0.000145078	5.27573	0006612 // protein targeting to membrane // inferred from reviewed computational analysis///0006635 // fatty acid beta-oxidation // inferred from mutant phenotype///0006635 // fatty acid beta-oxidation // inferred from reviewed computational analysis///0006810 // transport // inferred from sequence or structural similarity///0006839 // mitochondrial transport // inferred from sequence or structur…
246789_at	AT5G27600	LACS7	0.0147368	0.00255095	3.94642	0000278 // mitotic cell cycle // inferred from reviewed computational analysis///0001676 // long-chain fatty acid metabolic process // inferred from direct assay///0001676 // long-chain fatty acid metabolic process // traceable author statement///0006396 // RNA processing // inferred from reviewed computational analysis///0006629 // lipid metabolic process // inferred from electronic annotation//…
246744_at	AT5G27760		0.00338421	7.28324e-05	3.77025	0001666 // response to hypoxia // inferred from sequence or structural similarity///0009723 // response to ethylene stimulus // inferred from reviewed computational analysis
246756_at	AT5G27930		0.00402083	0.000128288	3.65502	0008152 // metabolic process // inferred from electronic annotation
246682_at	AT5G33290	XGD1	0.00613727	0.000396056	3.89644	0010398 // xylogalacturonan metabolic process // inferred from mutant phenotype///0045489 // pectin biosynthetic process // inferred from mutant phenotype
246620_at	AT5G36220	CYP81D1	0.00335577	7.15736e-05	7.14634	0055114 // oxidation-reduction process // inferred from electronic annotation
249626_at	AT5G37540		0.00221523	1.21902e-06	5.59679	0006508 // proteolysis // inferred from electronic annotation///0006508 // proteolysis // inferred from sequence or structural similarity
249515_at	AT5G38530	TSBtype2	0.00576808	0.000341653	4.76632	0000162 // tryptophan biosynthetic process // inferred from direct assay///0000162 // tryptophan biosynthetic process // inferred from electronic annotation///0000162 // tryptophan biosynthetic process // inferred from sequence or structural similarity///0008152 // metabolic process // inferred from electronic annotation
249481_at	AT5G38900		0.0281759	0.00817792	7.96089	0009627 // systemic acquired resistance // inferred from reviewed computational analysis///0009723 // response to ethylene stimulus // inferred from reviewed computational analysis///0009817 // defense response to fungus, incompatible interaction // inferred from direct assay///0034976 // response to endoplasmic reticulum stress // inferred from reviewed computational analysis
249494_at	AT5G39050		0.0242406	0.00634244	18.8523	0009636 // response to toxic substance // inferred from electronic annotation
249361_at	AT5G40540		0.0138843	0.00230282	3.15972	0006468 // protein phosphorylation // inferred from electronic annotation///0016310 // phosphorylation // inferred from electronic annotation
249377_at	AT5G40690		0.00343175	8.13594e-05	5.36143
249346_at	AT5G40780	LTH1	0.0248647	0.00662272	4.74491	0003333 // amino acid transmembrane transport // inferred from mutant phenotype///0006499 // N-terminal protein myristoylation // inferred from reviewed computational analysis///0006612 // protein targeting to membrane // inferred from reviewed computational analysis///0006810 // transport // inferred from electronic annotation///0006820 // anion transport // inferred from reviewed computational …
249255_at	AT5G41610	CHX18	0.0253922	0.00683519	3.85823	0006810 // transport // inferred from electronic annotation///0006811 // ion transport // inferred from electronic annotation///0006812 // cation transport // inferred by curator///0006812 // cation transport // inferred from electronic annotation///0006813 // potassium ion transport // inferred from electronic annotation///0006885 // regulation of pH // inferred from mutant phenotype///0035725 /…
249237_at	AT5G42050		0.015732	0.0028965	6.2674	0000165 // MAPK cascade // inferred from reviewed computational analysis///0006499 // N-terminal protein myristoylation // inferred from reviewed computational analysis///0006612 // protein targeting to membrane // inferred from reviewed computational analysis///0007154 // cell communication // inferred from reviewed computational analysis///0009409 // response to cold // inferred from reviewed c…
249197_at	AT5G42380	CML37	0.0308851	0.00961515	11.2834	0009693 // ethylene biosynthetic process // inferred from reviewed computational analysis///0010193 // response to ozone // inferred from expression pattern///0010286 // heat acclimation // inferred from reviewed computational analysis///0030968 // endoplasmic reticulum unfolded protein response // inferred from reviewed computational analysis///0052542 // defense response by callose deposition /…
249208_at	AT5G42650	AOS	0.00412632	0.000138868	5.67959	0000096 // sulfur amino acid metabolic process // inferred from reviewed computational analysis///0000165 // MAPK cascade // inferred from reviewed computational analysis///0006546 // glycine catabolic process // inferred from reviewed computational analysis///0006569 // tryptophan catabolic process // inferred from reviewed computational analysis///0006612 // protein targeting to membrane // inf…
249215_at	AT5G42800	DFR	0.0200404	0.00451386	11.3534	0009718 // anthocyanin-containing compound biosynthetic process // inferred from mutant phenotype///0009718 // anthocyanin-containing compound biosynthetic process // inferred from reviewed computational analysis///0009718 // anthocyanin-containing compound biosynthetic process // traceable author statement///0009744 // response to sucrose stimulus // inferred from reviewed computational analysis…
249188_at	AT5G42830		0.00309149	5.58245e-05	13.1491
249125_at	AT5G43450		0.00427138	0.00016085	24.8975	0055114 // oxidation-reduction process // inferred from electronic annotation
249071_at	AT5G44050		0.00693936	0.000524639	5.60924	0006855 // drug transmembrane transport // inferred from electronic annotation///0055085 // transmembrane transport // inferred from electronic annotation
248896_at	AT5G46350	WRKY8	0.00344654	8.86467e-05	11.0823	0006351 // transcription, DNA-dependent // inferred from electronic annotation///0006355 // regulation of transcription, DNA-dependent // inferred from electronic annotation///0006355 // regulation of transcription, DNA-dependent // inferred from sequence or structural similarity///0009737 // response to abscisic acid stimulus // inferred from expression pattern///0042742 // defense response to b…
248862_at	AT5G46730		0.0141766	0.00238159	3.80001
248821_at	AT5G47070		0.0147368	0.00254625	5.09306	0006468 // protein phosphorylation // inferred from electronic annotation///0009627 // systemic acquired resistance // inferred from reviewed computational analysis///0009697 // salicylic acid biosynthetic process // inferred from reviewed computational analysis///0016310 // phosphorylation // inferred from electronic annotation
248812_at	AT5G47330		0.0232988	0.0059083	13.0379	0006464 // cellular protein modification process // inferred from electronic annotation///0006865 // amino acid transport // inferred from reviewed computational analysis///0015824 // proline transport // inferred from reviewed computational analysis
248749_at	AT5G47880	ERF1-1	0.00307218	5.15604e-05	3.75039	0006412 // translation // inferred from electronic annotation///0006415 // translational termination // inferred from electronic annotation///0006415 // translational termination // inferred from genetic interaction///0006415 // translational termination // inferred from sequence or structural similarity
248713_at	AT5G48180	NSP5	0.00324104	6.37211e-05	10.0737	0006635 // fatty acid beta-oxidation // inferred from reviewed computational analysis///0009407 // toxin catabolic process // inferred from reviewed computational analysis///0019762 // glucosinolate catabolic process // inferred from direct assay///0043161 // proteasomal ubiquitin-dependent protein catabolic process // inferred from reviewed computational analysis///0051788 // response to misfold…
248676_at	AT5G48850	ATSDI1	0.00300045	3.93384e-05	47.0057	0006792 // regulation of sulfur utilization // inferred from mutant phenotype///0010438 // cellular response to sulfur starvation // inferred from expression pattern
248611_at	AT5G49520	WRKY48	0.0030759	5.53291e-05	5.65815	0002679 // respiratory burst involved in defense response // inferred from reviewed computational analysis///0006351 // transcription, DNA-dependent // inferred from electronic annotation///0006355 // regulation of transcription, DNA-dependent // inferred from electronic annotation///0006355 // regulation of transcription, DNA-dependent // inferred from sequence or structural similarity///0006865…
248524_s_at	AT5G50570///AT5G50670		0.00469388	0.000197674	4.48842	0006351 // transcription, DNA-dependent // inferred from electronic annotation///0006355 // regulation of transcription, DNA-dependent // traceable author statement///0048653 // anther development // inferred from mutant phenotype
248467_at	AT5G50800		0.00699206	0.000541693	3.70172	0006810 // transport // inferred from electronic annotation///0008643 // carbohydrate transport // inferred from electronic annotation///0015770 // sucrose transport // inferred from direct assay
248460_at	AT5G50915		0.00619763	0.000403764	9.69666	0006351 // transcription, DNA-dependent // inferred from electronic annotation///0006355 // regulation of transcription, DNA-dependent // inferred from electronic annotation///0009739 // response to gibberellin stimulus // inferred from expression pattern
248487_at	AT5G51070	ERD1	0.00699206	0.000537551	3.4515	0006200 // ATP catabolic process // inferred from direct assay///0006950 // response to stress // inferred from electronic annotation///0009646 // response to absence of light // inferred from reviewed computational analysis///0019538 // protein metabolic process // inferred from electronic annotation///0034214 // protein hexamerization // inferred from direct assay
248381_at	AT5G51830		0.0100254	0.00116059	4.37747	0006014 // D-ribose metabolic process // inferred from electronic annotation///0016310 // phosphorylation // inferred from electronic annotation///0046686 // response to cadmium ion // inferred from expression pattern
248392_at	AT5G52050		0.018346	0.00384929	9.00711	0006855 // drug transmembrane transport // inferred from electronic annotation///0009693 // ethylene biosynthetic process // inferred from reviewed computational analysis///0052542 // defense response by callose deposition // inferred from reviewed computational analysis///0055085 // transmembrane transport // inferred from electronic annotation
248337_at	AT5G52310	LTI78	0.015732	0.00289871	17.5832	0006950 // response to stress // inferred from electronic annotation///0006970 // response to osmotic stress // inferred from genetic interaction///0009269 // response to desiccation // inferred from mutant phenotype///0009409 // response to cold // inferred from expression pattern///0009409 // response to cold // inferred from reviewed computational analysis///0009414 // response to water depriv…
248333_at	AT5G52390		0.0263399	0.00727054	10.3673
248335_at	AT5G52450		0.00285464	2.64285e-05	3.77392	0006855 // drug transmembrane transport // inferred from electronic annotation///0009624 // response to nematode // inferred from expression pattern///0055085 // transmembrane transport // inferred from electronic annotation
248332_at	AT5G52640	ATHSP90.1	0.00719097	0.000571141	6.64893	0006457 // protein folding // inferred from electronic annotation///0006457 // protein folding // inferred from reviewed computational analysis///0006950 // response to stress // inferred from electronic annotation///0006952 // defense response // inferred from electronic annotation///0009408 // response to heat // inferred from expression pattern///0009408 // response to heat // inferred from re…
248322_at	AT5G52760		0.0153152	0.00274313	3.8046	0000165 // MAPK cascade // inferred from reviewed computational analysis///0002237 // response to molecule of bacterial origin // inferred from reviewed computational analysis///0006355 // regulation of transcription, DNA-dependent // inferred from reviewed computational analysis///0006612 // protein targeting to membrane // inferred from reviewed computational analysis///0009581 // detection of …
248330_at	AT5G52810		0.00910331	0.000949163	7.9818	0009627 // systemic acquired resistance // inferred from reviewed computational analysis///0034976 // response to endoplasmic reticulum stress // inferred from reviewed computational analysis
248248_at	AT5G53120	SPDS3	0.00307218	5.42417e-05	5.24851	0006596 // polyamine biosynthetic process // inferred from direct assay///0006597 // spermine biosynthetic process // inferred from electronic annotation///0008152 // metabolic process // inferred from electronic annotation///0042742 // defense response to bacterium // inferred from mutant phenotype
248271_at	AT5G53420		0.00803191	0.000712064	4.47792
248236_at	AT5G53870	ENODL1	0.00493034	0.00022045	6.42699
248185_at	AT5G54060	UF3GT	0.00513547	0.000245749	11.5123	0008152 // metabolic process // inferred from electronic annotation///0009718 // anthocyanin-containing compound biosynthetic process // inferred from mutant phenotype///0009718 // anthocyanin-containing compound biosynthetic process // inferred from reviewed computational analysis///0009744 // response to sucrose stimulus // inferred from reviewed computational analysis///0010224 // response to …
248199_at	AT5G54170		0.0100199	0.00115931	3.07646	0009611 // response to wounding // inferred from expression pattern///0009611 // response to wounding // inferred from reviewed computational analysis///0009620 // response to fungus // inferred from reviewed computational analysis///0009695 // jasmonic acid biosynthetic process // inferred from reviewed computational analysis///0009753 // response to jasmonic acid stimulus // inferred from revie…
248132_at	AT5G54840	SGP1	0.0104835	0.00129108	3.01707	0007264 // small GTPase mediated signal transduction // inferred from electronic annotation///0016192 // vesicle-mediated transport // inferred from reviewed computational analysis
248118_at	AT5G55050		0.00412632	0.000144207	7.10006	0006629 // lipid metabolic process // inferred from electronic annotation///0015824 // proline transport // inferred from reviewed computational analysis///0016042 // lipid catabolic process // inferred from electronic annotation
247933_at	AT5G56980		0.0226316	0.00559611	4.1718
247866_at	AT5G57550	XTR3	0.00975251	0.00109546	35.3082	0005975 // carbohydrate metabolic process // inferred from electronic annotation///0006073 // cellular glucan metabolic process // inferred from electronic annotation///0008152 // metabolic process // inferred from electronic annotation///0009832 // plant-type cell wall biogenesis // inferred from sequence or structural similarity
247925_at	AT5G57560	TCH4	0.00652449	0.000453337	4.15278	0005975 // carbohydrate metabolic process // inferred from electronic annotation///0006073 // cellular glucan metabolic process // inferred from electronic annotation///0008152 // metabolic process // inferred from electronic annotation///0009408 // response to heat // inferred from expression pattern///0009409 // response to cold // inferred from expression pattern///0009611 // response to wound…
247863_at	AT5G57890///AT5G57900	SKIP1	0.00343175	7.78846e-05	3.33317	0000162 // tryptophan biosynthetic process // traceable author statement///0007165 // signal transduction // inferred from reviewed computational analysis///0009617 // response to bacterium // inferred from expression pattern///0009755 // hormone-mediated signaling pathway // inferred from reviewed computational analysis///0016567 // protein ubiquitination // inferred from electronic annotation
247794_at	AT5G58670	PLC1	0.0192704	0.00420046	4.22014	0000165 // MAPK cascade // inferred from reviewed computational analysis///0006355 // regulation of transcription, DNA-dependent // inferred from reviewed computational analysis///0006612 // protein targeting to membrane // inferred from reviewed computational analysis///0006629 // lipid metabolic process // inferred from electronic annotation///0007165 // signal transduction // inferred from ele…
247723_at	AT5G59220	HAI1	0.0117204	0.00163777	8.72117	0007165 // signal transduction // inferred from reviewed computational analysis///0008152 // metabolic process // inferred from electronic annotation///0009409 // response to cold // inferred from reviewed computational analysis///0009414 // response to water deprivation // inferred from expression pattern///0009414 // response to water deprivation // inferred from reviewed computational analysis…
247717_at	AT5G59320	LTP3	0.00393902	0.000120693	63.5654	0006810 // transport // inferred from electronic annotation///0006869 // lipid transport // inferred from electronic annotation///0009409 // response to cold // inferred from reviewed computational analysis///0009414 // response to water deprivation // inferred from expression pattern///0009414 // response to water deprivation // inferred from reviewed computational analysis///0009737 // response…
247704_at	AT5G59510	RTFL5	0.00824488	0.000760644	21.3543	0015824 // proline transport // inferred from reviewed computational analysis///0048367 // shoot system development // inferred from sequence or structural similarity
247655_at	AT5G59820	RHL41	0.00306873	4.61464e-05	18.0823	0006351 // transcription, DNA-dependent // inferred from electronic annotation///0006355 // regulation of transcription, DNA-dependent // inferred from electronic annotation///0006979 // response to oxidative stress // inferred from expression pattern///0006979 // response to oxidative stress // inferred from mutant phenotype///0006979 // response to oxidative stress // inferred from reviewed com…
247618_at	AT5G60280		0.0112642	0.00150011	3.41027	0006468 // protein phosphorylation // inferred from electronic annotation///0016310 // phosphorylation // inferred from electronic annotation
247597_at	AT5G60860	AtRABA1f	0.00648521	0.000445374	3.09618	0006184 // GTP catabolic process // inferred from electronic annotation///0006810 // transport // inferred from electronic annotation///0006886 // intracellular protein transport // inferred from electronic annotation///0006913 // nucleocytoplasmic transport // inferred from electronic annotation///0007165 // signal transduction // inferred from electronic annotation///0007264 // small GTPase med…
247532_at	AT5G61560		0.00773052	0.00065257	4.04086	0002237 // response to molecule of bacterial origin // inferred from reviewed computational analysis///0002238 // response to molecule of fungal origin // inferred from reviewed computational analysis///0002679 // respiratory burst involved in defense response // inferred from reviewed computational analysis///0006468 // protein phosphorylation // inferred from electronic annotation///0006499 // …
247498_at	AT5G61810		0.00972707	0.0010879	3.40566	0006810 // transport // inferred from electronic annotation///0006810 // transport // inferred from sequence or structural similarity///0015867 // ATP transport // inferred from mutant phenotype///0030048 // actin filament-based movement // inferred from reviewed computational analysis///0051645 // Golgi localization // inferred from reviewed computational analysis///0051646 // mitochondrion loca…
247488_at	AT5G61820		0.0172142	0.00345699	5.22985	0009610 // response to symbiotic fungus // inferred from reviewed computational analysis///0009738 // abscisic acid mediated signaling pathway // inferred from reviewed computational analysis///0046482 // para-aminobenzoic acid metabolic process // inferred from reviewed computational analysis
247435_at	AT5G62480	ATGSTU9	0.00880474	0.000881814	13.7236	0009407 // toxin catabolic process // inferred from reviewed computational analysis///0009407 // toxin catabolic process // traceable author statement///0009636 // response to toxic substance // inferred from electronic annotation///0010583 // response to cyclopentenone // inferred from reviewed computational analysis
247360_at	AT5G63450	CYP94B1	0.0185309	0.00393213	13.0652	0009611 // response to wounding // inferred from expression pattern///0009694 // jasmonic acid metabolic process // inferred from reviewed computational analysis///0009753 // response to jasmonic acid stimulus // inferred from reviewed computational analysis///0055114 // oxidation-reduction process // inferred from electronic annotation
247314_at	AT5G64000	SAL2	0.02009	0.00455853	6.03431	0006790 // sulfur compound metabolic process // inferred from electronic annotation///0006790 // sulfur compound metabolic process // inferred from sequence or structural similarity///0008152 // metabolic process // inferred from electronic annotation///0009627 // systemic acquired resistance // inferred from reviewed computational analysis///0034976 // response to endoplasmic reticulum stress //…
247287_at	AT5G64230		0.00676522	0.000498938	6.94598
247279_at	AT5G64310	AGP1	0.00343175	7.43777e-05	3.39069	0010200 // response to chitin // inferred from reviewed computational analysis
247215_at	AT5G64905	PROPEP3	0.0307192	0.00953844	3.67766	0006952 // defense response // inferred from expression pattern///0071456 // cellular response to hypoxia // inferred from expression pattern
247175_at	AT5G65280	GCL1	0.00442805	0.000174664	5.34667
247193_at	AT5G65380		0.0147517	0.00255686	3.70086	0006855 // drug transmembrane transport // inferred from electronic annotation///0009835 // fruit ripening // inferred from sequence or structural similarity///0055085 // transmembrane transport // inferred from electronic annotation
247186_at	AT5G65470		0.00513547	0.000244997	3.37102
247118_at	AT5G65890	ACR1	0.00412632	0.0001438	3.29312	0008152 // metabolic process // inferred from electronic annotation
247126_at	AT5G66080		0.021843	0.00527997	3.43625	0006470 // protein dephosphorylation // inferred from electronic annotation
247095_at	AT5G66400	RAB18	0.00935563	0.00100869	28.7552	0006950 // response to stress // inferred from electronic annotation///0009414 // response to water deprivation // inferred from expression pattern///0009415 // response to water stimulus // inferred from electronic annotation///0009631 // cold acclimation // inferred from genetic interaction///0009737 // response to abscisic acid stimulus // inferred from expression pattern///0009961 // response…
247071_at	AT5G66640	DAR3	0.00858824	0.000828172	4.71642
246987_at	AT5G67300	MYBR1	0.00517315	0.000254306	3.71925	0006351 // transcription, DNA-dependent // inferred from electronic annotation///0006355 // regulation of transcription, DNA-dependent // inferred from sequence or structural similarity///0009414 // response to water deprivation // inferred from expression pattern///0009651 // response to salt stress // inferred from expression pattern///0009651 // response to salt stress // inferred from mutant …
247013_at	AT5G67480	BT4	0.00270789	1.51461e-05	8.10986	0006355 // regulation of transcription, DNA-dependent // inferred from electronic annotation///0006355 // regulation of transcription, DNA-dependent // traceable author statement///0009611 // response to wounding // inferred from expression pattern///0009651 // response to salt stress // inferred from expression pattern///0009733 // response to auxin stimulus // inferred from expression pattern//…
247009_at	AT5G67600		0.0060238	0.000384663	5.14551	0009554 // megasporogenesis // inferred from genetic interaction
