# Supplementary material for: Heterologous Overexpression of Poplar SnRK2 Genes Enhanced Salt Stress Tolerance in Arabidopsis thaliana
Source: Front Plant Sci. 2016 May 9;7:612. doi: 10.3389/fpls.2016.00612 (PMC4860416; doi:10.3389/fpls.2016.00612)
Supplement: Table S5 — Downregulated 698 genes in the PtSnRK2.7 overexpressor by the salt treatment (FC>3, p < 0.01). [file Table5.XLSX]

## Sheet: Table S5
Table S5. Downregulated 698 genes in the PtSnRK2.7 overexpressor by the salt treatment (FC>3, p<0.01)
Probe Set ID	AGI	Gene Symbol	Corrected p-value	p-value	Fold Change	Gene Ontology Biological Process
261577_at	AT1G01080		0.0124954	0.00185674	4.33792	0006655 // phosphatidylglycerol biosynthetic process // inferred from reviewed computational analysis///0010103 // stomatal complex morphogenesis // inferred from reviewed computational analysis///0019288 // isopentenyl diphosphate biosynthetic process, mevalonate-independent pathway // inferred from reviewed computational analysis
261058_at	AT1G01370	HTR12	0.0284823	0.00833463	3.06697	0000911 // cytokinesis by cell plate formation // inferred from reviewed computational analysis///0006270 // DNA replication initiation // inferred from reviewed computational analysis///0006275 // regulation of DNA replication // inferred from reviewed computational analysis///0006334 // nucleosome assembly // inferred from electronic annotation///0006346 // methylation-dependent chromatin silen…
261536_at	AT1G01790	KEA1	0.00223476	4.94654e-06	4.89128	0006810 // transport // inferred from electronic annotation///0006811 // ion transport // inferred from electronic annotation///0006812 // cation transport // inferred from electronic annotation///0006813 // potassium ion transport // inferred from electronic annotation///0055085 // transmembrane transport // inferred from electronic annotation
259443_at	AT1G02360		0.00887281	0.000899657	4.19464	0002679 // respiratory burst involved in defense response // inferred from reviewed computational analysis///0005975 // carbohydrate metabolic process // inferred from electronic annotation///0006032 // chitin catabolic process // inferred from electronic annotation///0006865 // amino acid transport // inferred from reviewed computational analysis///0010167 // response to nitrate // inferred from…
260914_at	AT1G02640	BXL2	0.00343175	8.05603e-05	16.3485	0005975 // carbohydrate metabolic process // inferred from electronic annotation///0008152 // metabolic process // inferred from electronic annotation///0046685 // response to arsenic-containing substance // inferred from reviewed computational analysis
262109_at	AT1G02730	ATCSLD5	0.00437855	0.000170937	5.22359	0000226 // microtubule cytoskeleton organization // inferred from reviewed computational analysis///0000271 // polysaccharide biosynthetic process // inferred from sequence or structural similarity///0000724 // double-strand break repair via homologous recombination // inferred from reviewed computational analysis///0000911 // cytokinesis by cell plate formation // inferred from reviewed computat…
262105_at	AT1G02810		0.0224964	0.005541	4.50691	0042545 // cell wall modification // inferred from electronic annotation///0043086 // negative regulation of catalytic activity // inferred from electronic annotation///0045490 // pectin catabolic process // inferred from electronic annotation
262131_at	AT1G02900	RALF1	0.0120268	0.0017361	5.82112	0007267 // cell-cell signaling // inferred from sequence or structural similarity///0019722 // calcium-mediated signaling // inferred from direct assay
262120_at	AT1G02950	ATGSTF4	0.00259785	1.09441e-05	4.242	0009407 // toxin catabolic process // inferred from reviewed computational analysis///0009407 // toxin catabolic process // traceable author statement///0009636 // response to toxic substance // inferred from electronic annotation
263114_at	AT1G03130	PSAD-2	0.0200517	0.00452472	3.74962	0015979 // photosynthesis // inferred from electronic annotation///0015979 // photosynthesis // inferred from sequence or structural similarity///0015979 // photosynthesis // inferred from reviewed computational analysis///0019684 // photosynthesis, light reaction // inferred from reviewed computational analysis///0030003 // cellular cation homeostasis // inferred from reviewed computational anal…
265083_at	AT1G03820		0.00402083	0.000129154	4.95386
265067_at	AT1G03850		0.0184192	0.00388201	4.1016	0009735 // response to cytokinin stimulus // inferred from expression pattern///0010167 // response to nitrate // inferred from reviewed computational analysis///0015706 // nitrate transport // inferred from reviewed computational analysis///0045454 // cell redox homeostasis // inferred from electronic annotation///0050832 // defense response to fungus // inferred from mutant phenotype///0080183 …
265066_at	AT1G03870	FLA9	0.0125122	0.00186511	4.68851
261175_at	AT1G04800		0.0082054	0.00075275	3.63065
264575_at	AT1G05190	emb2394	0.00466116	0.000193142	3.50677	0006098 // pentose-phosphate shunt // inferred from reviewed computational analysis///0006354 // DNA-dependent transcription, elongation // inferred from reviewed computational analysis///0006364 // rRNA processing // inferred from reviewed computational analysis///0006412 // translation // inferred from electronic annotation///0006412 // translation // inferred from sequence or structural simila…
264567_s_at	AT1G05240///AT1G05250		0.00418653	0.000150225	9.46941	0006979 // response to oxidative stress // inferred from electronic annotation///0009664 // plant-type cell wall organization // inferred from mutant phenotype///0009808 // lignin metabolic process // inferred from mutant phenotype///0042744 // hydrogen peroxide catabolic process // inferred from electronic annotation///0055114 // oxidation-reduction process // inferred from electronic annotation
261388_at	AT1G05385	LPA19	0.00263763	1.37688e-05	5.59854	0006098 // pentose-phosphate shunt // inferred from reviewed computational analysis///0010207 // photosystem II assembly // inferred from mutant phenotype
260831_at	AT1G06830		0.00513547	0.000246467	8.90074	0045454 // cell redox homeostasis // inferred from electronic annotation///0048653 // anther development // inferred from reviewed computational analysis
256060_at	AT1G07050		0.00889075	0.000907804	4.45936	0007623 // circadian rhythm // inferred from reviewed computational analysis
261078_at	AT1G07320	RPL4	0.00334133	6.99098e-05	4.4324	0006412 // translation // inferred from electronic annotation///0006412 // translation // inferred from sequence or structural similarity///0006412 // translation // traceable author statement///0019288 // isopentenyl diphosphate biosynthetic process, mevalonate-independent pathway // inferred from reviewed computational analysis///0019344 // cysteine biosynthetic process // inferred from reviewe…
261080_at	AT1G07370	PCNA1	0.0067253	0.000493393	3.21254	0006260 // DNA replication // inferred from reviewed computational analysis///0006261 // DNA-dependent DNA replication // inferred from reviewed computational analysis///0006275 // regulation of DNA replication // inferred from electronic annotation///0006275 // regulation of DNA replication // inferred from sequence or structural similarity///0006306 // DNA methylation // inferred from reviewed …
257481_at	AT1G08430	ALMT1	0.0297016	0.00901054	3.45294	0006810 // transport // inferred from electronic annotation///0006811 // ion transport // inferred from electronic annotation///0010044 // response to aluminum ion // inferred from expression pattern///0010044 // response to aluminum ion // inferred from mutant phenotype///0015743 // malate transport // inferred from electronic annotation///0071423 // malate transmembrane transport // inferred fr…
264802_at	AT1G08560	SYP111	0.0035559	9.54879e-05	6.17988	0000226 // microtubule cytoskeleton organization // inferred from reviewed computational analysis///0000910 // cytokinesis // inferred from reviewed computational analysis///0000911 // cytokinesis by cell plate formation // inferred from reviewed computational analysis///0006084 // acetyl-CoA metabolic process // inferred from reviewed computational analysis///0006810 // transport // inferred fro…
263676_at	AT1G09340	CRB	0.00316288	6.11608e-05	4.87953	0000165 // MAPK cascade // inferred from reviewed computational analysis///0000272 // polysaccharide catabolic process // inferred from electronic annotation///0005975 // carbohydrate metabolic process // inferred from electronic annotation///0005996 // monosaccharide metabolic process // inferred from mutant phenotype///0006098 // pentose-phosphate shunt // inferred from reviewed computational a…
264672_at	AT1G09750		0.00518911	0.000256022	5.47048	0006508 // proteolysis // inferred from electronic annotation
260465_at	AT1G10910		0.00864059	0.000849956	3.01131	0006355 // regulation of transcription, DNA-dependent // inferred from reviewed computational analysis
260475_at	AT1G11080	scpl31	0.0184192	0.00387668	4.28521	0006508 // proteolysis // inferred from electronic annotation///0006508 // proteolysis // inferred from sequence or structural similarity
264343_at	AT1G11850		0.0058257	0.00035113	4.1015
264394_at	AT1G11860		0.00325554	6.51474e-05	3.28808	0006546 // glycine catabolic process // inferred from electronic annotation///0006546 // glycine catabolic process // inferred from reviewed computational analysis///0007389 // pattern specification process // inferred from reviewed computational analysis///0008361 // regulation of cell size // inferred from reviewed computational analysis///0009658 // chloroplast organization // inferred from re…
264342_at	AT1G12080		0.016232	0.00308665	23.6259	0006084 // acetyl-CoA metabolic process // inferred from reviewed computational analysis///0016126 // sterol biosynthetic process // inferred from reviewed computational analysis///0016132 // brassinosteroid biosynthetic process // inferred from reviewed computational analysis
262793_at	AT1G13110	CYP71B7	0.0171425	0.00342608	3.76002	0006569 // tryptophan catabolic process // inferred from reviewed computational analysis///0006612 // protein targeting to membrane // inferred from reviewed computational analysis///0009684 // indoleacetic acid biosynthetic process // inferred from reviewed computational analysis///0009963 // positive regulation of flavonoid biosynthetic process // inferred from reviewed computational analysis//…
256071_at	AT1G13640		0.00545139	0.000286519	3.08063	0016310 // phosphorylation // inferred from electronic annotation
262648_at	AT1G14030		0.00299442	3.41251e-05	3.18354	0000023 // maltose metabolic process // inferred from reviewed computational analysis///0006655 // phosphatidylglycerol biosynthetic process // inferred from reviewed computational analysis///0009073 // aromatic amino acid family biosynthetic process // inferred from reviewed computational analysis///0009793 // embryo development ending in seed dormancy // inferred from reviewed computational ana…
262612_at	AT1G14150	PQL2	0.00221523	2.05193e-06	7.42393	0006098 // pentose-phosphate shunt // inferred from reviewed computational analysis///0009767 // photosynthetic electron transport chain // inferred from mutant phenotype///0015979 // photosynthesis // inferred from electronic annotation
262657_at	AT1G14210		0.0071248	0.000560702	3.63541	0009651 // response to salt stress // inferred from expression pattern
262830_at	AT1G14700	PAP3	0.00383512	0.000113827	6.95076
262598_at	AT1G15260		0.00746828	0.000608843	4.67018
262603_at	AT1G15380		0.0152985	0.00273021	5.53123	0005975 // carbohydrate metabolic process // inferred from sequence or structural similarity///0009744 // response to sucrose stimulus // inferred from reviewed computational analysis///0009750 // response to fructose stimulus // inferred from reviewed computational analysis
261768_at	AT1G15550	GA3OX1	0.0187175	0.00398433	6.20481	0009639 // response to red or far red light // inferred from expression pattern///0009686 // gibberellin biosynthetic process // inferred from mutant phenotype///0009686 // gibberellin biosynthetic process // traceable author statement///0009739 // response to gibberellin stimulus // inferred from expression pattern///0009740 // gibberellic acid mediated signaling pathway // traceable author stat…
259499_at	AT1G15730		0.0108522	0.00139086	3.25531
261845_at	AT1G15960	NRAMP6	0.00259785	1.19846e-05	3.64979	0006810 // transport // inferred from electronic annotation///0006811 // ion transport // inferred from electronic annotation///0006828 // manganese ion transport // inferred from reviewed computational analysis///0006875 // cellular metal ion homeostasis // non-traceable author statement///0015691 // cadmium ion transport // inferred from reviewed computational analysis///0030001 // metal ion tr…
255764_at	AT1G16720	HCF173	0.00515673	0.000250989	3.43003	0006413 // translational initiation // inferred from mutant phenotype///0010155 // regulation of proton transport // inferred from reviewed computational analysis///0046777 // protein autophosphorylation // inferred from reviewed computational analysis
260683_at	AT1G17560	HLL	0.0247369	0.00656005	5.32459	0006354 // DNA-dependent transcription, elongation // inferred from reviewed computational analysis///0006412 // translation // inferred from electronic annotation///0006412 // translation // inferred from sequence or structural similarity
260685_at	AT1G17650	GLYR2	0.00476364	0.000206263	3.12503	0006098 // pentose-phosphate shunt // inferred from electronic annotation///0006950 // response to stress // inferred from electronic annotation///0055114 // oxidation-reduction process // inferred from electronic annotation
256125_at	AT1G18250	ATLP-1	0.00576565	0.000341075	6.55964	0000226 // microtubule cytoskeleton organization // inferred from reviewed computational analysis///0000911 // cytokinesis by cell plate formation // inferred from reviewed computational analysis///0008283 // cell proliferation // inferred from reviewed computational analysis///0010075 // regulation of meristem growth // inferred from reviewed computational analysis///0051322 // anaphase // infer…
261663_at	AT1G18330///AT3G10113	EPR1	0.0154649	0.00279769	3.09818	0006355 // regulation of transcription, DNA-dependent // traceable author statement///0007623 // circadian rhythm // inferred from expression pattern///0009651 // response to salt stress // inferred from expression pattern///0009723 // response to ethylene stimulus // inferred from expression pattern///0046686 // response to cadmium ion // inferred from expression pattern
261660_at	AT1G18370	HIK	0.00774875	0.000660389	4.76792	0000226 // microtubule cytoskeleton organization // inferred from reviewed computational analysis///0000910 // cytokinesis // inferred from genetic interaction///0000911 // cytokinesis by cell plate formation // inferred from reviewed computational analysis///0007018 // microtubule-based movement // inferred from electronic annotation///0007049 // cell cycle // inferred from electronic annotation…
255779_at	AT1G18650	PDCB3	0.0031263	5.88387e-05	3.00619
261407_at	AT1G18810		0.00599202	0.000377244	3.76331	0009585 // red, far-red light phototransduction // inferred from electronic annotation///0010017 // red or far-red light signaling pathway // inferred from electronic annotation
261425_at	AT1G18880		0.0161369	0.00305405	5.40715	0006810 // transport // inferred from electronic annotation///0006826 // iron ion transport // inferred from reviewed computational analysis///0006857 // oligopeptide transport // inferred from electronic annotation///0006857 // oligopeptide transport // inferred from sequence or structural similarity///0010106 // cellular response to iron ion starvation // inferred from reviewed computational an…
259478_at	AT1G18980		0.0196228	0.00435419	4.69023	0000041 // transition metal ion transport // inferred from reviewed computational analysis///0006826 // iron ion transport // inferred from reviewed computational analysis///0010106 // cellular response to iron ion starvation // inferred from reviewed computational analysis///0010167 // response to nitrate // inferred from reviewed computational analysis///0015706 // nitrate transport // inferred…
256015_at	AT1G19150	LHCA6	0.00815724	0.000742588	3.22051	0006098 // pentose-phosphate shunt // inferred from reviewed computational analysis///0006364 // rRNA processing // inferred from reviewed computational analysis///0009637 // response to blue light // inferred from expression pattern///0009637 // response to blue light // inferred from reviewed computational analysis///0009644 // response to high light intensity // inferred from reviewed computat…
261230_at	AT1G20010	TUB5	0.00323899	6.30851e-05	3.13088	0006094 // gluconeogenesis // inferred from reviewed computational analysis///0006184 // GTP catabolic process // inferred from electronic annotation///0007010 // cytoskeleton organization // inferred from reviewed computational analysis///0007017 // microtubule-based process // inferred from electronic annotation///0007017 // microtubule-based process // inferred from sequence or structural simi…
261456_at	AT1G21050		0.00629136	0.000417511	3.84402
261453_at	AT1G21130		0.0284639	0.00832602	3.50213	0032259 // methylation // inferred from electronic annotation
259553_x_at	AT1G21310	ATEXT3	0.00421465	0.000152979	3.74007	0009664 // plant-type cell wall organization // inferred from electronic annotation///0009735 // response to cytokinin stimulus // inferred from reviewed computational analysis///0043161 // proteasomal ubiquitin-dependent protein catabolic process // inferred from reviewed computational analysis///0043248 // proteasome assembly // inferred from reviewed computational analysis///0048767 // root ha…
260877_at	AT1G21500		0.00418653	0.000150514	4.89886
261927_at	AT1G22500		0.00652449	0.000457015	3.44504	0009416 // response to light stimulus // inferred from expression pattern///0010167 // response to nitrate // inferred from reviewed computational analysis///0015706 // nitrate transport // inferred from reviewed computational analysis///0016567 // protein ubiquitination // inferred from direct assay///0033591 // response to L-ascorbic acid // inferred from expression pattern
261942_at	AT1G22590	AGL87	0.00657075	0.000464756	5.1995	0006355 // regulation of transcription, DNA-dependent // traceable author statement
264195_at	AT1G22690		0.00226104	6.39123e-06	8.79578	0009739 // response to gibberellin stimulus // inferred from sequence or structural similarity///0009740 // gibberellic acid mediated signaling pathway // inferred from electronic annotation
262986_at	AT1G23390		0.0125791	0.00189744	3.73921
265169_x_at	AT1G23720		0.0124248	0.00183995	3.36231	0009664 // plant-type cell wall organization // inferred from electronic annotation
245876_at	AT1G26230		0.0114094	0.00154143	3.42146	0000023 // maltose metabolic process // inferred from reviewed computational analysis///0006457 // protein folding // inferred from mutant phenotype///0006655 // phosphatidylglycerol biosynthetic process // inferred from reviewed computational analysis///0016556 // mRNA modification // inferred from reviewed computational analysis///0019252 // starch biosynthetic process // inferred from reviewed…
259599_at	AT1G28110	SCPL45	0.00221523	3.32782e-06	3.60339	0006508 // proteolysis // inferred from electronic annotation///0006508 // proteolysis // inferred from sequence or structural similarity
245688_at	AT1G28290	AGP31	0.0150927	0.00264486	8.04602	0009753 // response to jasmonic acid stimulus // inferred from expression pattern
261500_at	AT1G28400		0.0160238	0.00300793	3.37882
260898_at	AT1G29070		0.00299442	3.35287e-05	3.08285	0006412 // translation // inferred from electronic annotation///0006412 // translation // inferred from sequence or structural similarity///0042254 // ribosome biogenesis // inferred from sequence or structural similarity
259790_s_at	AT1G29430///AT5G27780		0.00221523	3.29033e-06	16.277	0009733 // response to auxin stimulus // inferred from sequence or structural similarity
257506_at	AT1G29440		0.0112744	0.001507	4.22161	0009733 // response to auxin stimulus // inferred from sequence or structural similarity///0009741 // response to brassinosteroid stimulus // inferred from reviewed computational analysis///0009926 // auxin polar transport // inferred from direct assay///0080086 // stamen filament development // inferred from mutant phenotype
259773_at	AT1G29500		0.00412632	0.000143382	5.49642	0009733 // response to auxin stimulus // inferred from sequence or structural similarity
259783_at	AT1G29510	SAUR68	0.00749993	0.000614989	7.11034	0009733 // response to auxin stimulus // inferred from sequence or structural similarity
261801_at	AT1G30520	AAE14	0.00375872	0.000108275	5.18349	0008152 // metabolic process // inferred from electronic annotation///0042372 // phylloquinone biosynthetic process // inferred from mutant phenotype
263227_at	AT1G30750		0.0102829	0.00123114	3.39039	0010413 // glucuronoxylan metabolic process // inferred from reviewed computational analysis///0016132 // brassinosteroid biosynthetic process // inferred from reviewed computational analysis///0045492 // xylan biosynthetic process // inferred from reviewed computational analysis
264529_at	AT1G30820		0.0210319	0.00495328	3.16735	0006221 // pyrimidine nucleotide biosynthetic process // inferred from electronic annotation///0006541 // glutamine metabolic process // inferred from electronic annotation///0044210 // 'de novo' CTP biosynthetic process // inferred from electronic annotation
265160_at	AT1G31050		0.015732	0.00290526	8.14632	0000041 // transition metal ion transport // inferred from reviewed computational analysis///0006351 // transcription, DNA-dependent // inferred from electronic annotation///0006355 // regulation of transcription, DNA-dependent // traceable author statement///0015698 // inorganic anion transport // inferred from reviewed computational analysis///0048527 // lateral root development // inferred fro…
263706_s_at	AT1G31180///AT5G14200	IMD1///IMD3	0.00690822	0.000519218	3.20036	0008152 // metabolic process // inferred from sequence or structural similarity///0008652 // cellular amino acid biosynthetic process // inferred from electronic annotation///0009082 // branched-chain amino acid biosynthetic process // inferred from electronic annotation///0009098 // leucine biosynthetic process // inferred from electronic annotation///0009098 // leucine biosynthetic process // i…
263693_at	AT1G31200	ATPP2-A9	0.00299442	3.53786e-05	3.36542
262558_at	AT1G31335		0.00887281	0.000898481	5.5425
246313_at	AT1G31920		0.00376364	0.000109529	6.06593	0010075 // regulation of meristem growth // inferred from reviewed computational analysis///0016556 // mRNA modification // inferred from reviewed computational analysis
255751_at	AT1G31950		0.010504	0.00129728	3.73019	0008152 // metabolic process // inferred from electronic annotation///0016114 // terpenoid biosynthetic process // inferred from electronic annotation
255720_at	AT1G32060	PRK	0.00285464	2.46713e-05	3.39225	0000165 // MAPK cascade // inferred from reviewed computational analysis///0005975 // carbohydrate metabolic process // inferred from electronic annotation///0006098 // pentose-phosphate shunt // inferred from reviewed computational analysis///0006364 // rRNA processing // inferred from reviewed computational analysis///0006612 // protein targeting to membrane // inferred from reviewed computatio…
255719_at	AT1G32080		0.00667726	0.000487733	3.6127	0006810 // transport // inferred from electronic annotation///0009658 // chloroplast organization // inferred from mutant phenotype///0009853 // photorespiration // inferred from electronic annotation///0009853 // photorespiration // inferred from mutant phenotype///0010027 // thylakoid membrane organization // inferred from reviewed computational analysis///0030003 // cellular cation homeostasis…
260693_at	AT1G32450	NRT1.5	0.007415	0.000600688	4.90122	0006598 // polyamine catabolic process // inferred from reviewed computational analysis///0006810 // transport // inferred from electronic annotation///0006826 // iron ion transport // inferred from reviewed computational analysis///0006857 // oligopeptide transport // inferred from electronic annotation///0006857 // oligopeptide transport // inferred from sequence or structural similarity///0009…
260704_at	AT1G32470		0.00997449	0.00114668	3.74016	0006098 // pentose-phosphate shunt // inferred from reviewed computational analysis///0006364 // rRNA processing // inferred from reviewed computational analysis///0006546 // glycine catabolic process // inferred from electronic annotation///0006546 // glycine catabolic process // inferred from sequence or structural similarity///0009657 // plastid organization // inferred from reviewed computati…
261190_at	AT1G32990	PRPL11	0.0104835	0.00128603	3.19618	0006364 // rRNA processing // inferred from reviewed computational analysis///0006412 // translation // inferred from electronic annotation///0010027 // thylakoid membrane organization // inferred from reviewed computational analysis///0015995 // chlorophyll biosynthetic process // inferred from reviewed computational analysis///0019288 // isopentenyl diphosphate biosynthetic process, mevalonate-…
261593_at	AT1G33170		0.00882975	0.000887933	5.34105	0032259 // methylation // inferred from electronic annotation
261991_at	AT1G33700		0.00652449	0.000455213	3.02987	0006629 // lipid metabolic process // inferred from electronic annotation///0006665 // sphingolipid metabolic process // inferred from electronic annotation///0006680 // glucosylceramide catabolic process // inferred from electronic annotation///0008152 // metabolic process // inferred from electronic annotation
261981_at	AT1G33811		0.00804018	0.000719198	3.57821	0006629 // lipid metabolic process // inferred from electronic annotation///0010103 // stomatal complex morphogenesis // inferred from reviewed computational analysis///0016042 // lipid catabolic process // inferred from electronic annotation
259930_at	AT1G34355	PS1	0.0300433	0.0092141	3.44892	0006275 // regulation of DNA replication // inferred from reviewed computational analysis///0006306 // DNA methylation // inferred from reviewed computational analysis///0006342 // chromatin silencing // inferred from reviewed computational analysis///0007267 // cell-cell signaling // inferred from reviewed computational analysis///0008283 // cell proliferation // inferred from reviewed computati…
262029_at	AT1G35680		0.0165482	0.00318747	3.08258	0006364 // rRNA processing // inferred from reviewed computational analysis///0006412 // translation // inferred from sequence or structural similarity///0009409 // response to cold // inferred from expression pattern///0009409 // response to cold // inferred from reviewed computational analysis///0009658 // chloroplast organization // inferred from mutant phenotype///0009790 // embryo developmen…
245739_at	AT1G44110	CYCA1;1	0.00393473	0.000119633	4.48458	0000079 // regulation of cyclin-dependent protein serine/threonine kinase activity // inferred from electronic annotation///0000911 // cytokinesis by cell plate formation // inferred from reviewed computational analysis///0006260 // DNA replication // inferred from reviewed computational analysis///0006270 // DNA replication initiation // inferred from reviewed computational analysis///0006275 //…
262427_s_at	AT1G47600///AT1G51470	BGLU34	0.0189268	0.0040818	4.38879	0005975 // carbohydrate metabolic process // inferred from electronic annotation///0008152 // metabolic process // inferred from electronic annotation///0009651 // response to salt stress // inferred from expression pattern///0019760 // glucosinolate metabolic process // inferred from mutant phenotype
261308_at	AT1G48480	RKL1	0.00843525	0.000796554	3.07161	0006468 // protein phosphorylation // inferred from electronic annotation///0006468 // protein phosphorylation // inferred from sequence or structural similarity///0007169 // transmembrane receptor protein tyrosine kinase signaling pathway // inferred from sequence or structural similarity///0010075 // regulation of meristem growth // inferred from reviewed computational analysis///0016310 // pho…
260770_at	AT1G49200		0.0289636	0.00859621	12.1685	0016567 // protein ubiquitination // inferred from electronic annotation
262396_at	AT1G49470		0.00649562	0.000446738	6.18949
262399_at	AT1G49500		0.0127724	0.00195165	4.17755	0006569 // tryptophan catabolic process // inferred from reviewed computational analysis///0009684 // indoleacetic acid biosynthetic process // inferred from reviewed computational analysis
261638_at	AT1G49975		0.0054247	0.000282979	4.41721	0015979 // photosynthesis // inferred from electronic annotation
262467_at	AT1G50240	FU	0.00593962	0.00036784	5.18074	0000087 // M phase of mitotic cell cycle // inferred from reviewed computational analysis///0000226 // microtubule cytoskeleton organization // inferred from reviewed computational analysis///0000278 // mitotic cell cycle // inferred from reviewed computational analysis///0000280 // nuclear division // inferred from reviewed computational analysis///0000911 // cytokinesis by cell plate formation …
246630_at	AT1G50730		0.0178432	0.00368075	6.05739	0042732 // D-xylose metabolic process // inferred from reviewed computational analysis
265048_at	AT1G52050		0.0149582	0.00260707	11.9143
259839_at	AT1G52190		0.00343175	8.31615e-05	5.96218	0006810 // transport // inferred from electronic annotation///0006857 // oligopeptide transport // inferred from electronic annotation///0006857 // oligopeptide transport // inferred from sequence or structural similarity
260982_at	AT1G53520		0.0031263	5.88465e-05	3.34468	0006631 // fatty acid metabolic process // inferred from mutant phenotype///0009813 // flavonoid biosynthetic process // inferred from electronic annotation
259964_at	AT1G53680	ATGSTU28	0.00597171	0.000373686	5.47851	0009407 // toxin catabolic process // inferred from reviewed computational analysis///0009407 // toxin catabolic process // traceable author statement///0009636 // response to toxic substance // inferred from electronic annotation///0010583 // response to cyclopentenone // inferred from reviewed computational analysis///0046686 // response to cadmium ion // inferred from expression pattern
264238_at	AT1G54740		0.0190322	0.0041194	3.14276
265076_at	AT1G55490	CPN60B	0.00424983	0.000157073	3.40333	0006457 // protein folding // inferred from electronic annotation///0006457 // protein folding // traceable author statement///0008219 // cell death // inferred from mutant phenotype///0009409 // response to cold // inferred from expression pattern///0009627 // systemic acquired resistance // inferred from mutant phenotype///0016117 // carotenoid biosynthetic process // inferred from reviewed com…
260603_at	AT1G55960		0.0167297	0.00325651	3.34181	0010264 // myo-inositol hexakisphosphate biosynthetic process // inferred from reviewed computational analysis
256225_at	AT1G56220		0.0197323	0.00438481	3.36485	0009741 // response to brassinosteroid stimulus // inferred from reviewed computational analysis///0032880 // regulation of protein localization // inferred from reviewed computational analysis
259633_at	AT1G56500		0.00699206	0.000539088	3.26066	0000023 // maltose metabolic process // inferred from reviewed computational analysis///0008152 // metabolic process // inferred from electronic annotation///0009773 // photosynthetic electron transport in photosystem I // inferred from reviewed computational analysis///0009902 // chloroplast relocation // inferred from reviewed computational analysis///0010027 // thylakoid membrane organization …
245828_at	AT1G57820	VIM1	0.0084542	0.000799472	3.3333	0000278 // mitotic cell cycle // inferred from reviewed computational analysis///0000280 // nuclear division // inferred from reviewed computational analysis///0000724 // double-strand break repair via homologous recombination // inferred from reviewed computational analysis///0000911 // cytokinesis by cell plate formation // inferred from reviewed computational analysis///0006260 // DNA replicat…
256025_at	AT1G58370	RXF12	0.00402343	0.000129496	3.82392	0005975 // carbohydrate metabolic process // inferred from electronic annotation///0008152 // metabolic process // inferred from electronic annotation///0010413 // glucuronoxylan metabolic process // inferred from reviewed computational analysis///0045492 // xylan biosynthetic process // inferred from reviewed computational analysis
264277_at	AT1G60390	PG1	0.00418653	0.000150584	4.40568
265032_at	AT1G61580	RPL3B	0.0138378	0.00228556	3.19079	0006412 // translation // inferred from electronic annotation///0006412 // translation // inferred from sequence or structural similarity///0009165 // nucleotide biosynthetic process // inferred from reviewed computational analysis///0052541 // plant-type cell wall cellulose metabolic process // inferred from reviewed computational analysis///0052546 // cell wall pectin metabolic process // infer…
265031_at	AT1G61590		0.0210863	0.00497719	3.0383	0006468 // protein phosphorylation // inferred from electronic annotation///0010413 // glucuronoxylan metabolic process // inferred from reviewed computational analysis///0016310 // phosphorylation // inferred from electronic annotation///0045492 // xylan biosynthetic process // inferred from reviewed computational analysis
265116_at	AT1G62480		0.00935563	0.00100282	5.34788	0006816 // calcium ion transport // inferred from reviewed computational analysis///0007030 // Golgi organization // inferred from reviewed computational analysis///0009651 // response to salt stress // inferred from expression pattern///0009651 // response to salt stress // inferred from reviewed computational analysis///0046686 // response to cadmium ion // inferred from expression pattern
262645_at	AT1G62750	SCO1	0.00632158	0.000426065	3.81622	0000023 // maltose metabolic process // inferred from reviewed computational analysis///0006098 // pentose-phosphate shunt // inferred from reviewed computational analysis///0006184 // GTP catabolic process // inferred from electronic annotation///0006354 // DNA-dependent transcription, elongation // inferred from reviewed computational analysis///0006364 // rRNA processing // inferred from revie…
262643_at	AT1G62770		0.00567892	0.000317483	4.02371	0010014 // meristem initiation // inferred from reviewed computational analysis///0010089 // xylem development // inferred from reviewed computational analysis///0043086 // negative regulation of catalytic activity // inferred from electronic annotation
262693_at	AT1G62780		0.00413899	0.000145979	3.58854	0000023 // maltose metabolic process // inferred from reviewed computational analysis///0006098 // pentose-phosphate shunt // inferred from reviewed computational analysis///0009902 // chloroplast relocation // inferred from reviewed computational analysis///0010027 // thylakoid membrane organization // inferred from reviewed computational analysis///0019252 // starch biosynthetic process // infe…
262646_at	AT1G62800	ASP4	0.0248236	0.00659517	3.76494	0006103 // 2-oxoglutarate metabolic process // inferred from sequence or structural similarity///0006520 // cellular amino acid metabolic process // inferred from electronic annotation///0006531 // aspartate metabolic process // inferred from sequence or structural similarity///0006536 // glutamate metabolic process // inferred from sequence or structural similarity///0009058 // biosynthetic proc…
259686_at	AT1G63100		0.0157697	0.00292982	3.77878	0000226 // microtubule cytoskeleton organization // inferred from reviewed computational analysis///0000911 // cytokinesis by cell plate formation // inferred from reviewed computational analysis///0006351 // transcription, DNA-dependent // inferred from electronic annotation///0006355 // regulation of transcription, DNA-dependent // traceable author statement///0048451 // petal formation // infe…
259738_at	AT1G64355		0.00742064	0.000603267	3.49534	0010207 // photosystem II assembly // inferred from reviewed computational analysis
259765_at	AT1G64370		0.00699206	0.000538855	4.64635	0006612 // protein targeting to membrane // inferred from reviewed computational analysis///0009963 // positive regulation of flavonoid biosynthetic process // inferred from reviewed computational analysis///0010363 // regulation of plant-type hypersensitive response // inferred from reviewed computational analysis
261954_at	AT1G64510		0.00418653	0.000149657	3.17317	0006412 // translation // inferred from electronic annotation///0006412 // translation // inferred from sequence or structural similarity///0010027 // thylakoid membrane organization // inferred from reviewed computational analysis///0042254 // ribosome biogenesis // inferred from sequence or structural similarity
261956_at	AT1G64590		0.013775	0.00226811	3.15896	0008152 // metabolic process // inferred from electronic annotation///0055114 // oxidation-reduction process // inferred from electronic annotation
262883_at	AT1G64780	ATAMT1;2	0.0156669	0.00287109	5.91278	0006810 // transport // inferred from sequence or structural similarity///0009624 // response to nematode // inferred from expression pattern///0010264 // myo-inositol hexakisphosphate biosynthetic process // inferred from reviewed computational analysis///0015695 // organic cation transport // inferred from electronic annotation///0015695 // organic cation transport // inferred from sequence or …
263111_s_at	AT1G65190///AT1G65250		0.0067931	0.000501867	7.35198	0006468 // protein phosphorylation // inferred from electronic annotation///0006468 // protein phosphorylation // inferred from sequence or structural similarity///0016310 // phosphorylation // inferred from electronic annotation
256527_at	AT1G66100		0.00307218	5.4164e-05	6.29203	0006952 // defense response // inferred from electronic annotation///0006952 // defense response // inferred from sequence or structural similarity
259823_at	AT1G66250		0.00576565	0.000340085	3.87213	0005975 // carbohydrate metabolic process // inferred from electronic annotation///0006952 // defense response // inferred from electronic annotation///0008152 // metabolic process // inferred from electronic annotation
255856_at	AT1G66940		0.00260105	1.26995e-05	5.50603	0016310 // phosphorylation // inferred from electronic annotation
245196_at	AT1G67750		0.0137884	0.0022712	3.16378	0045490 // pectin catabolic process // inferred from electronic annotation
260012_at	AT1G67865		0.00259785	9.68648e-06	4.46554	0050832 // defense response to fungus // inferred from expression pattern
260007_at	AT1G67870		0.0130598	0.00204464	6.57456	0006612 // protein targeting to membrane // inferred from reviewed computational analysis///0009963 // positive regulation of flavonoid biosynthetic process // inferred from reviewed computational analysis///0010363 // regulation of plant-type hypersensitive response // inferred from reviewed computational analysis
259996_at	AT1G67910		0.00860343	0.000835692	7.75326
260014_at	AT1G68010	HPR	0.0103298	0.00124361	3.37883	0006364 // rRNA processing // inferred from reviewed computational analysis///0008152 // metabolic process // inferred from electronic annotation///0009637 // response to blue light // inferred from reviewed computational analysis///0009657 // plastid organization // inferred from reviewed computational analysis///0009773 // photosynthetic electron transport in photosystem I // inferred from revi…
260266_at	AT1G68520		0.0196119	0.00434295	3.47524	0000165 // MAPK cascade // inferred from reviewed computational analysis///0006355 // regulation of transcription, DNA-dependent // inferred from reviewed computational analysis///0006355 // regulation of transcription, DNA-dependent // traceable author statement///0006612 // protein targeting to membrane // inferred from reviewed computational analysis///0009617 // response to bacterium // infer…
260034_at	AT1G68810		0.0215627	0.00517006	9.02549	0006351 // transcription, DNA-dependent // inferred from electronic annotation///0006355 // regulation of transcription, DNA-dependent // traceable author statement
257516_at	AT1G69040	ACR4	0.00935563	0.00101013	3.0826	0006521 // regulation of cellular amino acid metabolic process // inferred from sequence or structural similarity///0008152 // metabolic process // inferred from electronic annotation///0009735 // response to cytokinin stimulus // inferred from expression pattern
260353_at	AT1G69230	SP1L2	0.00828798	0.000768845	3.12862
256304_at	AT1G69523		0.00372144	0.000104237	6.5079	0008152 // metabolic process // inferred from electronic annotation///0032259 // methylation // inferred from electronic annotation
260363_at	AT1G70550		0.00911035	0.000951269	3.36817	0009736 // cytokinin mediated signaling pathway // inferred from reviewed computational analysis///0010413 // glucuronoxylan metabolic process // inferred from reviewed computational analysis///0045492 // xylan biosynthetic process // inferred from reviewed computational analysis
260364_at	AT1G70560	TAA1	0.021049	0.00496273	5.01361	0009641 // shade avoidance // inferred from mutant phenotype///0009684 // indoleacetic acid biosynthetic process // inferred from mutant phenotype///0009723 // response to ethylene stimulus // inferred from mutant phenotype///0009793 // embryo development ending in seed dormancy // inferred from genetic interaction///0009851 // auxin biosynthetic process // inferred from electronic annotation///0…
260181_at	AT1G70710	ATGH9B1	0.0042354	0.00015514	4.97713	0000272 // polysaccharide catabolic process // inferred from electronic annotation///0005975 // carbohydrate metabolic process // inferred from electronic annotation///0008152 // metabolic process // inferred from electronic annotation///0009664 // plant-type cell wall organization // inferred from reviewed computational analysis///0030245 // cellulose catabolic process // inferred from electroni…
262288_at	AT1G70760	CRR23	0.00239191	8.21763e-06	5.39698	0006098 // pentose-phosphate shunt // inferred from reviewed computational analysis///0009773 // photosynthetic electron transport in photosystem I // traceable author statement///0030003 // cellular cation homeostasis // inferred from reviewed computational analysis///0055114 // oxidation-reduction process // inferred from electronic annotation///0070838 // divalent metal ion transport // inferr…
259741_at	AT1G71020		0.00699206	0.000540576	3.04392	0016567 // protein ubiquitination // inferred from electronic annotation
260167_at	AT1G71970		0.0169133	0.00334333	3.68553
262377_at	AT1G73110		0.00313391	5.98675e-05	3.12973	0010027 // thylakoid membrane organization // inferred from reviewed computational analysis///0016117 // carotenoid biosynthetic process // inferred from reviewed computational analysis
245736_at	AT1G73330	ATDR4	0.0274425	0.00781174	8.31289	0006508 // proteolysis // inferred from electronic annotation///0009414 // response to water deprivation // inferred from expression pattern///0009737 // response to abscisic acid stimulus // inferred from expression pattern///0010466 // negative regulation of peptidase activity // inferred from sequence or structural similarity///0010951 // negative regulation of endopeptidase activity // inferr…
259842_at	AT1G73600///AT1G73602	CPuORF32	0.00335577	7.11854e-05	51.858	0000023 // maltose metabolic process // inferred from reviewed computational analysis///0006629 // lipid metabolic process // inferred from electronic annotation///0006656 // phosphatidylcholine biosynthetic process // inferred from electronic annotation///0008152 // metabolic process // inferred from electronic annotation///0008654 // phospholipid biosynthetic process // inferred from electronic…
260077_at	AT1G73620		0.0145812	0.00249815	3.8443	0051707 // response to other organism // inferred from sequence or structural similarity
260073_at	AT1G73660		0.0150499	0.00262981	3.50445	0006468 // protein phosphorylation // inferred from electronic annotation///0009651 // response to salt stress // inferred from mutant phenotype///0016310 // phosphorylation // inferred from electronic annotation///0048573 // photoperiodism, flowering // inferred from reviewed computational analysis
260388_at	AT1G74070		0.00299442	3.51319e-05	4.19284	0000413 // protein peptidyl-prolyl isomerization // inferred from electronic annotation///0006457 // protein folding // inferred from electronic annotation///0006457 // protein folding // inferred from sequence or structural similarity///0016556 // mRNA modification // inferred from reviewed computational analysis///0019288 // isopentenyl diphosphate biosynthetic process, mevalonate-independent p…
260234_at	AT1G74460		0.0226316	0.005596	7.04163	0006629 // lipid metabolic process // inferred from electronic annotation///0016042 // lipid catabolic process // inferred from electronic annotation
260221_at	AT1G74670		0.00221523	2.27726e-06	13.7858	0009739 // response to gibberellin stimulus // inferred from sequence or structural similarity///0009740 // gibberellic acid mediated signaling pathway // inferred from reviewed computational analysis///0009740 // gibberellic acid mediated signaling pathway // traceable author statement///0009744 // response to sucrose stimulus // inferred from expression pattern///0009749 // response to glucose …
262175_at	AT1G74880	NDH-O	0.00591179	0.000364597	5.61154	0010155 // regulation of proton transport // inferred from reviewed computational analysis///0010258 // NADH dehydrogenase complex (plastoquinone) assembly // inferred from mutant phenotype///0019684 // photosynthesis, light reaction // inferred from reviewed computational analysis///0046777 // protein autophosphorylation // inferred from reviewed computational analysis///0055114 // oxidation-red…
262172_at	AT1G74970	RPS9	0.00225938	5.66079e-06	3.887	0006412 // translation // inferred from electronic annotation///0006412 // translation // inferred from sequence or structural similarity///0006412 // translation // traceable author statement
261118_at	AT1G75460		0.00343175	8.204e-05	4.18143	0000165 // MAPK cascade // inferred from reviewed computational analysis///0006355 // regulation of transcription, DNA-dependent // inferred from reviewed computational analysis///0006508 // proteolysis // inferred from electronic annotation///0006612 // protein targeting to membrane // inferred from reviewed computational analysis///0009617 // response to bacterium // inferred from reviewed comp…
262951_at	AT1G75500	WAT1	0.00567968	0.00031967	4.44202	0000162 // tryptophan biosynthetic process // inferred from electronic annotation///0000271 // polysaccharide biosynthetic process // inferred from reviewed computational analysis///0006833 // water transport // inferred from reviewed computational analysis///0006952 // defense response // inferred from electronic annotation///0007389 // pattern specification process // inferred from reviewed com…
262970_at	AT1G75690		0.00306873	4.74245e-05	3.08461	0006098 // pentose-phosphate shunt // inferred from reviewed computational analysis///0006364 // rRNA processing // inferred from reviewed computational analysis///0006457 // protein folding // inferred from direct assay///0006457 // protein folding // inferred from electronic annotation///0009657 // plastid organization // inferred from reviewed computational analysis///0010206 // photosystem II…
262978_at	AT1G75780	TUB1	0.0152584	0.00271292	3.86373	0000271 // polysaccharide biosynthetic process // inferred from reviewed computational analysis///0006094 // gluconeogenesis // inferred from reviewed computational analysis///0006184 // GTP catabolic process // inferred from electronic annotation///0007010 // cytoskeleton organization // inferred from reviewed computational analysis///0007017 // microtubule-based process // inferred from electro…
262728_at	AT1G75820	CLV1	0.0120857	0.00175284	7.1978	0006468 // protein phosphorylation // inferred from electronic annotation///0006468 // protein phosphorylation // inferred from sequence or structural similarity///0007169 // transmembrane receptor protein tyrosine kinase signaling pathway // inferred from sequence or structural similarity///0007172 // signal complex assembly // inferred from direct assay///0007275 // multicellular organismal dev…
261782_at	AT1G76110		0.0156546	0.00286605	3.88347	0000165 // MAPK cascade // inferred from reviewed computational analysis///0006333 // chromatin assembly or disassembly // inferred from reviewed computational analysis///0006351 // transcription, DNA-dependent // inferred from electronic annotation///0006355 // regulation of transcription, DNA-dependent // inferred from reviewed computational analysis///0006355 // regulation of transcription, DN…
261780_at	AT1G76310	CYCB2;4	0.00221523	3.54079e-06	5.96894	0000079 // regulation of cyclin-dependent protein serine/threonine kinase activity // inferred from electronic annotation///0006260 // DNA replication // inferred from reviewed computational analysis///0006270 // DNA replication initiation // inferred from reviewed computational analysis///0006275 // regulation of DNA replication // inferred from reviewed computational analysis///0006306 // DNA m…
259978_at	AT1G76540	CDKB2;1	0.00396781	0.00012361	3.79569	0000086 // G2/M transition of mitotic cell cycle // traceable author statement///0000087 // M phase of mitotic cell cycle // inferred from reviewed computational analysis///0000226 // microtubule cytoskeleton organization // inferred from reviewed computational analysis///0000278 // mitotic cell cycle // inferred from reviewed computational analysis///0000280 // nuclear division // inferred from …
264482_at	AT1G77210	STP14	0.00588556	0.000360768	6.83888	0006810 // transport // inferred from electronic annotation///0008643 // carbohydrate transport // inferred from electronic annotation///0015757 // galactose transport // inferred from genetic interaction///0055085 // transmembrane transport // inferred from electronic annotation
259707_at	AT1G77490	TAPX	0.00307218	5.01088e-05	8.18965	0006979 // response to oxidative stress // inferred from electronic annotation///0009631 // cold acclimation // inferred from mutant phenotype///0010019 // chloroplast-nucleus signaling pathway // inferred from mutant phenotype///0010027 // thylakoid membrane organization // inferred from reviewed computational analysis///0015979 // photosynthesis // inferred from reviewed computational analysis/…
259763_at	AT1G77630		0.0103813	0.00125981	3.49692	0006952 // defense response // inferred from electronic annotation///0006955 // immune response // inferred from mutant phenotype///0009664 // plant-type cell wall organization // inferred from reviewed computational analysis///0016998 // cell wall macromolecule catabolic process // inferred from electronic annotation///0016998 // cell wall macromolecule catabolic process // inferred from sequenc…
259681_at	AT1G77760	NIA1	0.0124753	0.00185214	5.12716	0006809 // nitric oxide biosynthetic process // inferred from mutant phenotype///0009416 // response to light stimulus // inferred from mutant phenotype///0009635 // response to herbicide // inferred from electronic annotation///0042128 // nitrate assimilation // inferred from electronic annotation///0042128 // nitrate assimilation // inferred from mutant phenotype///0055114 // oxidation-reductio…
262162_at	AT1G78020		0.00324104	6.41295e-05	4.16556
260081_at	AT1G78170		0.0151359	0.00266332	3.84946
260774_at	AT1G78290		0.0118375	0.00168078	3.55803	0006468 // protein phosphorylation // inferred from electronic annotation///0006970 // response to osmotic stress // inferred from genetic interaction///0016310 // phosphorylation // inferred from electronic annotation///0080167 // response to karrikin // inferred from expression pattern
260805_at	AT1G78320	ATGSTU23	0.0065002	0.000448074	4.09219	0009407 // toxin catabolic process // traceable author statement///0009636 // response to toxic substance // inferred from electronic annotation
260745_at	AT1G78370	ATGSTU20	0.0165951	0.00320687	4.5389	0000023 // maltose metabolic process // inferred from reviewed computational analysis///0006569 // tryptophan catabolic process // inferred from reviewed computational analysis///0009407 // toxin catabolic process // traceable author statement///0009636 // response to toxic substance // inferred from electronic annotation///0009684 // indoleacetic acid biosynthetic process // inferred from review…
263126_at	AT1G78460		0.00469388	0.000197955	9.49096
263121_at	AT1G78530		0.0282292	0.0082134	3.97104	0006468 // protein phosphorylation // inferred from electronic annotation///0016310 // phosphorylation // inferred from electronic annotation
263131_at	AT1G78630	emb1473	0.00418653	0.000148317	3.0747	0006412 // translation // inferred from electronic annotation///0006412 // translation // inferred from sequence or structural similarity///0009793 // embryo development ending in seed dormancy // non-traceable author statement///0045036 // protein targeting to chloroplast // inferred from reviewed computational analysis
263130_at	AT1G78650	POLD3	0.00393473	0.000119713	3.49856	0000278 // mitotic cell cycle // inferred from reviewed computational analysis///0000724 // double-strand break repair via homologous recombination // inferred from reviewed computational analysis///0006260 // DNA replication // inferred from electronic annotation///0006261 // DNA-dependent DNA replication // inferred from reviewed computational analysis///0006270 // DNA replication initiation //…
261351_at	AT1G79790		0.00221523	9.72298e-07	3.69409	0008152 // metabolic process // inferred from electronic annotation
262045_at	AT1G80240///AT2G44100	ATGDI1	0.0293339	0.0087798	9.99412	0006487 // protein N-linked glycosylation // inferred from reviewed computational analysis///0006623 // protein targeting to vacuole // inferred from reviewed computational analysis///0015031 // protein transport // inferred from electronic annotation///0015031 // protein transport // inferred from sequence or structural similarity///0016192 // vesicle-mediated transport // inferred from reviewed…
260297_at	AT1G80280		0.00930446	0.000989701	5.81452
260287_at	AT1G80440		0.00375872	0.000107723	5.38964	0080037 // negative regulation of cytokinin mediated signaling pathway // inferred from genetic interaction
266330_at	AT2G01530	MLP329	0.0280517	0.00810458	9.46531	0006826 // iron ion transport // inferred from reviewed computational analysis///0006952 // defense response // inferred from electronic annotation///0009607 // response to biotic stimulus // inferred from electronic annotation///0010106 // cellular response to iron ion starvation // inferred from reviewed computational analysis///0010167 // response to nitrate // inferred from reviewed computati…
266329_at	AT2G01590	CRR3	0.00285464	2.19573e-05	3.06529	0009773 // photosynthetic electron transport in photosystem I // traceable author statement
263305_at	AT2G01930	BPC1	0.0058257	0.000352399	3.23257	0006351 // transcription, DNA-dependent // inferred from electronic annotation///0006355 // regulation of transcription, DNA-dependent // inferred from physical interaction///0009723 // response to ethylene stimulus // inferred from genetic interaction///0050793 // regulation of developmental process // inferred from genetic interaction
265250_at	AT2G01950	BRL2	0.0168172	0.00330704	5.51033	0002237 // response to molecule of bacterial origin // inferred from reviewed computational analysis///0006468 // protein phosphorylation // inferred from electronic annotation///0006468 // protein phosphorylation // inferred from sequence or structural similarity///0007165 // signal transduction // inferred from reviewed computational analysis///0007169 // transmembrane receptor protein tyrosine…
267220_at	AT2G02500	ISPD	0.0193448	0.00422539	4.66135	0000096 // sulfur amino acid metabolic process // inferred from reviewed computational analysis///0006546 // glycine catabolic process // inferred from reviewed computational analysis///0006636 // unsaturated fatty acid biosynthetic process // inferred from reviewed computational analysis///0006733 // oxidoreduction coenzyme metabolic process // inferred from reviewed computational analysis///000…
263322_at	AT2G04270	RNEE/G	0.00742064	0.000602482	4.76451	0006396 // RNA processing // inferred from electronic annotation///0009658 // chloroplast organization // inferred from mutant phenotype///0009902 // chloroplast relocation // inferred from reviewed computational analysis///0010027 // thylakoid membrane organization // inferred from reviewed computational analysis///0010239 // chloroplast mRNA processing // inferred from mutant phenotype///001655…
263674_at	AT2G04790		0.0192026	0.00416861	4.45276	0009965 // leaf morphogenesis // inferred from reviewed computational analysis///0030154 // cell differentiation // inferred from reviewed computational analysis///0045893 // positive regulation of transcription, DNA-dependent // inferred from reviewed computational analysis
265656_at	AT2G13820		0.00601355	0.000379798	4.70291	0006084 // acetyl-CoA metabolic process // inferred from reviewed computational analysis///0006869 // lipid transport // inferred from electronic annotation///0006869 // lipid transport // inferred from sequence or structural similarity///0016126 // sterol biosynthetic process // inferred from reviewed computational analysis///0016132 // brassinosteroid biosynthetic process // inferred from revie…
266587_at	AT2G14880		0.00307218	5.40131e-05	3.19365
265918_at	AT2G15090	KCS8	0.0184192	0.00387498	3.01992	0000038 // very long-chain fatty acid metabolic process // inferred from mutant phenotype///0006633 // fatty acid biosynthetic process // inferred from electronic annotation///0008152 // metabolic process // inferred from electronic annotation///0008610 // lipid biosynthetic process // inferred from electronic annotation///0030497 // fatty acid elongation // inferred from mutant phenotype
265475_at	AT2G15620	NIR1	0.00285464	2.74671e-05	4.16878	0010167 // response to nitrate // inferred from expression pattern///0010167 // response to nitrate // inferred from reviewed computational analysis///0015706 // nitrate transport // inferred from reviewed computational analysis///0019344 // cysteine biosynthetic process // inferred from reviewed computational analysis///0042128 // nitrate assimilation // inferred from electronic annotation///005…
265478_at	AT2G15890	MEE14	0.00504299	0.000231642	4.0329	0009793 // embryo development ending in seed dormancy // inferred from mutant phenotype///0050832 // defense response to fungus // inferred from expression pattern
263607_at	AT2G16270		0.00652449	0.000453872	6.13032	0000226 // microtubule cytoskeleton organization // inferred from reviewed computational analysis///0000911 // cytokinesis by cell plate formation // inferred from reviewed computational analysis///0051225 // spindle assembly // inferred from reviewed computational analysis///0051322 // anaphase // inferred from reviewed computational analysis
263064_at	AT2G18160///AT2G18162	CPuORF1	0.0125356	0.00187474	3.59773	0006355 // regulation of transcription, DNA-dependent // inferred from electronic annotation///0006355 // regulation of transcription, DNA-dependent // inferred from sequence or structural similarity
265342_at	AT2G18300		0.0116207	0.00159761	9.50698	0006351 // transcription, DNA-dependent // inferred from electronic annotation///0006355 // regulation of transcription, DNA-dependent // traceable author statement///0009299 // mRNA transcription // inferred from direct assay///0009725 // response to hormone stimulus // inferred from mutant phenotype///0009735 // response to cytokinin stimulus // inferred from expression pattern///0009826 // uni…
266941_at	AT2G18980		0.0120857	0.0017525	3.80294	0000041 // transition metal ion transport // inferred from reviewed computational analysis///0006826 // iron ion transport // inferred from reviewed computational analysis///0006979 // response to oxidative stress // inferred from electronic annotation///0009736 // cytokinin mediated signaling pathway // inferred from reviewed computational analysis///0010106 // cellular response to iron ion star…
266689_at	AT2G19930		0.0126882	0.00193102	3.2392	0009410 // response to xenobiotic stimulus // inferred from reviewed computational analysis///0009640 // photomorphogenesis // inferred from reviewed computational analysis///0009793 // embryo development ending in seed dormancy // inferred from reviewed computational analysis///0009845 // seed germination // inferred from reviewed computational analysis///0009855 // determination of bilateral sy…
263373_at	AT2G20515		0.0222043	0.00542054	4.03575
265387_at	AT2G20670		0.018346	0.00384834	6.80709
265443_at	AT2G20750	ATEXPB1	0.0273316	0.00775559	4.18057	0009664 // plant-type cell wall organization // inferred from sequence or structural similarity///0009826 // unidimensional cell growth // inferred from sequence or structural similarity///0009826 // unidimensional cell growth // non-traceable author statement///0009828 // plant-type cell wall loosening // inferred from sequence or structural similarity///0009828 // plant-type cell wall loosening…
264025_at	AT2G21050	LAX2	0.00221523	2.67329e-06	5.76133	0006810 // transport // inferred from electronic annotation///0006865 // amino acid transport // inferred from sequence or structural similarity///0006865 // amino acid transport // inferred from reviewed computational analysis///0009624 // response to nematode // inferred from expression pattern///0009624 // response to nematode // inferred from reviewed computational analysis///0009734 // auxin…
264014_at	AT2G21210		0.00313391	6.00579e-05	6.39638	0009733 // response to auxin stimulus // inferred from sequence or structural similarity///0010200 // response to chitin // inferred from expression pattern///0015995 // chlorophyll biosynthetic process // inferred from reviewed computational analysis
263549_at	AT2G21650	MEE3	0.0115708	0.00158629	3.77645	0006351 // transcription, DNA-dependent // inferred from electronic annotation///0006355 // regulation of transcription, DNA-dependent // inferred from sequence or structural similarity///0009630 // gravitropism // inferred from mutant phenotype///0009793 // embryo development ending in seed dormancy // inferred from mutant phenotype///0010114 // response to red light // inferred from mutant phen…
263431_at	AT2G22170		0.00282745	1.78795e-05	3.63704	0009611 // response to wounding // inferred from reviewed computational analysis///0009695 // jasmonic acid biosynthetic process // inferred from reviewed computational analysis
263998_at	AT2G22510		0.00855989	0.000821015	4.89413
267265_at	AT2G22980	SCPL13	0.00429836	0.000163706	4.44527	0006508 // proteolysis // inferred from electronic annotation///0006508 // proteolysis // inferred from sequence or structural similarity
267121_at	AT2G23540		0.00883357	0.000889827	4.45653	0006629 // lipid metabolic process // inferred from electronic annotation///0016042 // lipid catabolic process // inferred from electronic annotation
267126_s_at	AT2G23590///AT2G23600	ACL	0.00969764	0.00108215	4.59425	0009696 // salicylic acid metabolic process // inferred from mutant phenotype
266575_at	AT2G24060		0.0205724	0.0047618	3.1611	0006412 // translation // inferred from electronic annotation///0006413 // translational initiation // inferred from electronic annotation///0006413 // translational initiation // inferred from sequence or structural similarity///0009073 // aromatic amino acid family biosynthetic process // inferred from reviewed computational analysis///0009793 // embryo development ending in seed dormancy // in…
266570_at	AT2G24090		0.00363692	0.000100189	3.61606	0006098 // pentose-phosphate shunt // inferred from reviewed computational analysis///0006412 // translation // inferred from electronic annotation///0006412 // translation // inferred from sequence or structural similarity
263788_at	AT2G24580		0.0182621	0.00381878	3.6918	0046653 // tetrahydrofolate metabolic process // inferred from electronic annotation///0055114 // oxidation-reduction process // inferred from electronic annotation
257436_s_at	AT2G24650///AT4G00260	MEE45	0.0080392	0.000715747	3.54957	0006351 // transcription, DNA-dependent // inferred from electronic annotation///0006355 // regulation of transcription, DNA-dependent // inferred from electronic annotation///0006355 // regulation of transcription, DNA-dependent // inferred from sequence or structural similarity///0009793 // embryo development ending in seed dormancy // inferred from mutant phenotype
264377_at	AT2G25060	ENODL14	0.00605456	0.000389809	4.37437	0000226 // microtubule cytoskeleton organization // inferred from reviewed computational analysis///0000911 // cytokinesis by cell plate formation // inferred from reviewed computational analysis///0016572 // histone phosphorylation // inferred from reviewed computational analysis
266655_at	AT2G25880	AtAUR2	0.0238596	0.00616186	4.24569	0006342 // chromatin silencing // inferred from reviewed computational analysis///0006468 // protein phosphorylation // inferred from electronic annotation///0008283 // cell proliferation // inferred from reviewed computational analysis///0010075 // regulation of meristem growth // inferred from reviewed computational analysis///0010103 // stomatal complex morphogenesis // inferred from reviewed …
267402_at	AT2G26180	IQD6	0.00829233	0.000769782	3.41851
264061_at	AT2G27970	CKS2	0.00388101	0.000116685	3.18122	0000278 // mitotic cell cycle // inferred from reviewed computational analysis///0001708 // cell fate specification // inferred from reviewed computational analysis///0007049 // cell cycle // inferred from electronic annotation///0010440 // stomatal lineage progression // inferred from reviewed computational analysis///0042023 // DNA endoreduplication // inferred from reviewed computational analy…
264069_at	AT2G28000	CPN60A	0.00658802	0.000469317	3.13188	0006457 // protein folding // inferred from electronic annotation///0006457 // protein folding // traceable author statement///0009658 // chloroplast organization // inferred from mutant phenotype///0009658 // chloroplast organization // inferred from reviewed computational analysis///0009790 // embryo development // inferred from mutant phenotype///0009793 // embryo development ending in seed do…
266165_at	AT2G28190	CSD2	0.00571238	0.000330969	3.36132	0006801 // superoxide metabolic process // inferred from electronic annotation///0006979 // response to oxidative stress // inferred from direct assay///0009407 // toxin catabolic process // inferred from reviewed computational analysis///0009416 // response to light stimulus // inferred from expression pattern///0010039 // response to iron ion // inferred from expression pattern///0019430 // rem…
265545_at	AT2G28250	NCRK	0.00221523	4.26474e-06	5.56862	0006468 // protein phosphorylation // inferred from electronic annotation///0007155 // cell adhesion // inferred from reviewed computational analysis///0010014 // meristem initiation // inferred from reviewed computational analysis///0010089 // xylem development // inferred from direct assay///0010089 // xylem development // inferred from reviewed computational analysis///0010090 // trichome morp…
265277_at	AT2G28410		0.0113444	0.00152756	3.43933
263437_at	AT2G28670		0.00910793	0.00095023	3.46081	0010345 // suberin biosynthetic process // inferred from mutant phenotype
266790_at	AT2G28950	ATEXPA6	0.0162084	0.00307591	4.1392	0006816 // calcium ion transport // inferred from reviewed computational analysis///0006949 // syncytium formation // inferred from expression pattern///0006949 // syncytium formation // inferred from reviewed computational analysis///0007020 // microtubule nucleation // inferred from reviewed computational analysis///0007030 // Golgi organization // inferred from reviewed computational analysis/…
266285_at	AT2G29180		0.00571238	0.000331358	5.16556	0009965 // leaf morphogenesis // inferred from reviewed computational analysis///0030154 // cell differentiation // inferred from reviewed computational analysis///0045893 // positive regulation of transcription, DNA-dependent // inferred from reviewed computational analysis
266279_at	AT2G29290		0.0100299	0.00116222	11.3899	0008152 // metabolic process // inferred from electronic annotation///0055114 // oxidation-reduction process // inferred from electronic annotation
266277_at	AT2G29310		0.0205724	0.00475853	3.7815	0008152 // metabolic process // inferred from electronic annotation///0055114 // oxidation-reduction process // inferred from electronic annotation
266276_at	AT2G29330	TRI	0.0138868	0.00230436	3.12117	0000041 // transition metal ion transport // inferred from reviewed computational analysis///0006826 // iron ion transport // inferred from reviewed computational analysis///0008152 // metabolic process // inferred from electronic annotation///0010106 // cellular response to iron ion starvation // inferred from reviewed computational analysis///0010167 // response to nitrate // inferred from revi…
266297_at	AT2G29570	PCNA2	0.00774875	0.000660334	3.07839	0006260 // DNA replication // inferred from reviewed computational analysis///0006261 // DNA-dependent DNA replication // inferred from reviewed computational analysis///0006275 // regulation of DNA replication // inferred from electronic annotation///0006275 // regulation of DNA replication // inferred from sequence or structural similarity///0006306 // DNA methylation // inferred from reviewed …
266644_at	AT2G29660		0.0278914	0.00800762	3.46726	0006355 // regulation of transcription, DNA-dependent // traceable author statement///0016132 // brassinosteroid biosynthetic process // inferred from reviewed computational analysis
263485_at	AT2G29890	VLN1	0.0223222	0.00547451	5.09903	0000226 // microtubule cytoskeleton organization // inferred from reviewed computational analysis///0000278 // mitotic cell cycle // inferred from reviewed computational analysis///0000911 // cytokinesis by cell plate formation // inferred from reviewed computational analysis///0006306 // DNA methylation // inferred from reviewed computational analysis///0006342 // chromatin silencing // inferred…
266805_at	AT2G30010	TBL45	0.00889027	0.000906471	5.67727
267307_at	AT2G30210	LAC3	0.0170667	0.00339118	5.83304	0046274 // lignin catabolic process // inferred from electronic annotation///0055114 // oxidation-reduction process // inferred from electronic annotation
267578_at	AT2G30695		0.00343175	8.28787e-05	5.70814	0006364 // rRNA processing // inferred from reviewed computational analysis///0006399 // tRNA metabolic process // inferred from reviewed computational analysis///0006457 // protein folding // inferred from electronic annotation///0009073 // aromatic amino acid family biosynthetic process // inferred from reviewed computational analysis///0009658 // chloroplast organization // inferred from revie…
263477_at	AT2G31790		0.00382138	0.000112527	3.30057	0008152 // metabolic process // inferred from electronic annotation///0019761 // glucosinolate biosynthetic process // inferred from reviewed computational analysis
265724_at	AT2G32100	OFP16	0.030554	0.00944727	4.03449	0045892 // negative regulation of transcription, DNA-dependent // inferred from direct assay
266336_at	AT2G32270	ZIP3	0.0110548	0.00144477	3.70072	0006810 // transport // inferred from electronic annotation///0006811 // ion transport // inferred from electronic annotation///0006826 // iron ion transport // inferred from reviewed computational analysis///0006829 // zinc ion transport // inferred from sequence or structural similarity///0006829 // zinc ion transport // traceable author statement///0006833 // water transport // inferred from r…
267644_s_at	AT2G32870///AT2G32880		0.00742064	0.000603529	10.0153
267596_s_at	AT2G33050///AT2G33060	AtRLP26	0.00883758	0.000892323	6.9026	0006952 // defense response // inferred from sequence or structural similarity///0007165 // signal transduction // inferred by curator
255817_at	AT2G33330	PDLP3	0.00576446	0.000338813	3.08755	0010497 // plasmodesmata-mediated intercellular transport // inferred from genetic interaction///0046739 // spread of virus in multicellular host // inferred from genetic interaction
267435_at	AT2G33800		0.00688538	0.000515743	3.57042	0006412 // translation // inferred from electronic annotation///0006412 // translation // inferred from sequence or structural similarity///0009409 // response to cold // inferred from expression pattern///0009409 // response to cold // inferred from reviewed computational analysis///0042742 // defense response to bacterium // inferred from reviewed computational analysis///0045036 // protein tar…
267461_at	AT2G33830		0.00535506	0.000274284	5.82147
267459_at	AT2G33850		0.014539	0.00248543	4.48785
267006_at	AT2G34190		0.00618724	0.000401313	3.97376	0006810 // transport // inferred from electronic annotation///0055085 // transmembrane transport // inferred from electronic annotation
266899_at	AT2G34620		0.00935563	0.00100387	4.68241
267310_at	AT2G34680	AIR9	0.0075272	0.000619933	3.78019	0007155 // cell adhesion // inferred from reviewed computational analysis///0009733 // response to auxin stimulus // inferred from expression pattern///0010014 // meristem initiation // inferred from reviewed computational analysis///0010090 // trichome morphogenesis // inferred from reviewed computational analysis///0010102 // lateral root morphogenesis // inferred from expression pattern///0016…
266625_at	AT2G35380		0.0139613	0.00232729	4.09155	0000041 // transition metal ion transport // inferred from reviewed computational analysis///0006979 // response to oxidative stress // inferred from electronic annotation///0042744 // hydrogen peroxide catabolic process // inferred from electronic annotation///0055114 // oxidation-reduction process // inferred from electronic annotation
266608_at	AT2G35500	SKL2	0.00221523	1.33762e-06	4.0322	0000096 // sulfur amino acid metabolic process // inferred from reviewed computational analysis///0006546 // glycine catabolic process // inferred from reviewed computational analysis///0006636 // unsaturated fatty acid biosynthetic process // inferred from reviewed computational analysis///0006733 // oxidoreduction coenzyme metabolic process // inferred from reviewed computational analysis///000…
263951_at	AT2G35960	NHL12	0.00226104	6.34688e-06	4.50654	0000023 // maltose metabolic process // inferred from reviewed computational analysis///0019252 // starch biosynthetic process // inferred from reviewed computational analysis
263946_at	AT2G36000		0.00412632	0.000143029	3.50313
263284_at	AT2G36100		0.0236773	0.00608197	4.32839	0007043 // cell-cell junction assembly // inferred from direct assay///0042545 // cell wall modification // inferred from mutant phenotype
263287_at	AT2G36145		0.0206673	0.00480026	4.68509	0000023 // maltose metabolic process // inferred from reviewed computational analysis///0006098 // pentose-phosphate shunt // inferred from reviewed computational analysis///0019252 // starch biosynthetic process // inferred from reviewed computational analysis///0043085 // positive regulation of catalytic activity // inferred from reviewed computational analysis
263915_at	AT2G36430		0.0196228	0.00435295	3.06363	0009741 // response to brassinosteroid stimulus // inferred from reviewed computational analysis
265464_at	AT2G37080	RIP3	0.0171977	0.00344856	3.27643	0000911 // cytokinesis by cell plate formation // inferred from reviewed computational analysis///0051322 // anaphase // inferred from reviewed computational analysis
265471_at	AT2G37130		0.00980496	0.00110547	5.27998	0006979 // response to oxidative stress // inferred from electronic annotation///0042744 // hydrogen peroxide catabolic process // inferred from electronic annotation///0048511 // rhythmic process // inferred from electronic annotation///0050832 // defense response to fungus // inferred from mutant phenotype///0055114 // oxidation-reduction process // inferred from electronic annotation
265966_at	AT2G37220		0.0080392	0.000714475	3.00635	0006397 // mRNA processing // inferred from electronic annotation///0009409 // response to cold // inferred from expression pattern///0009409 // response to cold // inferred from reviewed computational analysis///0009697 // salicylic acid biosynthetic process // inferred from reviewed computational analysis///0009737 // response to abscisic acid stimulus // inferred from expression pattern///0009…
265967_at	AT2G37450		0.00285464	2.47078e-05	3.72591	0016556 // mRNA modification // inferred from reviewed computational analysis
265962_at	AT2G37460		0.0184192	0.00388218	5.71861	0019761 // glucosinolate biosynthetic process // inferred from reviewed computational analysis
267157_at	AT2G37630	AS1	0.014093	0.00235668	3.47734	0006351 // transcription, DNA-dependent // inferred from electronic annotation///0006355 // regulation of transcription, DNA-dependent // inferred from electronic annotation///0008356 // asymmetric cell division // inferred from mutant phenotype///0008356 // asymmetric cell division // inferred from reviewed computational analysis///0009615 // response to virus // inferred from mutant phenotype//…
257381_at	AT2G37950		0.0209472	0.00492526	4.12974	0009555 // pollen development // inferred from mutant phenotype///0009741 // response to brassinosteroid stimulus // inferred from reviewed computational analysis
267092_at	AT2G38120	AUX1	0.0138843	0.00229898	3.02627	0000271 // polysaccharide biosynthetic process // inferred from reviewed computational analysis///0001736 // establishment of planar polarity // inferred from genetic interaction///0003333 // amino acid transmembrane transport // inferred from sequence or structural similarity///0006810 // transport // inferred from electronic annotation///0006865 // amino acid transport // inferred from sequence…
267138_s_at	AT2G38210///AT2G38230	PDX1.1	0.024821	0.00658555	3.06302	0008152 // metabolic process // inferred from electronic annotation///0008615 // pyridoxine biosynthetic process // inferred from electronic annotation///0009228 // thiamine biosynthetic process // inferred from electronic annotation///0009723 // response to ethylene stimulus // inferred from sequence or structural similarity///0042819 // vitamin B6 biosynthetic process // inferred from genetic i…
267037_at	AT2G38320	TBL34	0.0180787	0.00376766	4.0521	0010413 // glucuronoxylan metabolic process // inferred from reviewed computational analysis///0042546 // cell wall biogenesis // inferred from reviewed computational analysis///0044036 // cell wall macromolecule metabolic process // inferred from reviewed computational analysis///0045492 // xylan biosynthetic process // inferred from reviewed computational analysis
266403_at	AT2G38600		0.00707176	0.000553035	4.24868
266401_s_at	AT2G38620///AT3G54180	CDKB1;2	0.0163486	0.00312469	3.5132	0006468 // protein phosphorylation // inferred from electronic annotation///0007049 // cell cycle // inferred from electronic annotation///0007067 // mitosis // inferred from electronic annotation///0009826 // unidimensional cell growth // inferred from mutant phenotype///0010376 // stomatal complex formation // inferred from expression pattern///0010376 // stomatal complex formation // traceable…
263264_at	AT2G38810	HTA8	0.00517315	0.000253192	3.28258	0001510 // RNA methylation // inferred from reviewed computational analysis///0006333 // chromatin assembly or disassembly // inferred from reviewed computational analysis///0006334 // nucleosome assembly // inferred from electronic annotation///0006338 // chromatin remodeling // inferred from reviewed computational analysis///0008283 // cell proliferation // inferred from reviewed computational …
266979_at	AT2G39470	PPL2	0.00285464	2.54319e-05	3.83607	0010207 // photosystem II assembly // inferred from reviewed computational analysis///0015979 // photosynthesis // inferred from electronic annotation///0016556 // mRNA modification // inferred from reviewed computational analysis///0019344 // cysteine biosynthetic process // inferred from reviewed computational analysis
266965_at	AT2G39510		0.011945	0.00171836	5.51619
265722_at	AT2G40100	LHCB4.3	0.00781687	0.000679984	5.2823	0006364 // rRNA processing // inferred from reviewed computational analysis///0009637 // response to blue light // inferred from expression pattern///0009637 // response to blue light // inferred from reviewed computational analysis///0009765 // photosynthesis, light harvesting // inferred from electronic annotation///0010114 // response to red light // inferred from expression pattern///0010114 …
263836_at	AT2G40330	PYL6	0.0265807	0.00739186	4.16522	0009738 // abscisic acid mediated signaling pathway // inferred from electronic annotation///0009738 // abscisic acid mediated signaling pathway // inferred from sequence or structural similarity///0010029 // regulation of seed germination // inferred from reviewed computational analysis
255876_at	AT2G40480		0.0095867	0.0010593	5.72006
255826_at	AT2G40490	HEME2	0.00655312	0.000461825	3.98099	0006779 // porphyrin-containing compound biosynthetic process // inferred from electronic annotation///0006782 // protoporphyrinogen IX biosynthetic process // inferred from electronic annotation///0015995 // chlorophyll biosynthetic process // inferred from reviewed computational analysis
255822_at	AT2G40610	ATEXPA8	0.023664	0.00605846	4.79352	0006949 // syncytium formation // inferred from expression pattern///0009664 // plant-type cell wall organization // inferred from electronic annotation///0009826 // unidimensional cell growth // inferred from sequence or structural similarity///0009826 // unidimensional cell growth // non-traceable author statement///0009828 // plant-type cell wall loosening // inferred from sequence or structur…
266372_at	AT2G41310	ATRR3	0.0115492	0.001581	3.19563	0000160 // phosphorelay signal transduction system // inferred from electronic annotation///0000160 // phosphorelay signal transduction system // inferred from sequence or structural similarity///0006351 // transcription, DNA-dependent // inferred from electronic annotation///0006355 // regulation of transcription, DNA-dependent // inferred from electronic annotation///0006355 // regulation of tr…
245117_at	AT2G41560	ACA4	0.0187175	0.00398458	4.66757	0006754 // ATP biosynthetic process // inferred from electronic annotation///0006810 // transport // inferred from electronic annotation///0006811 // ion transport // inferred from electronic annotation///0006812 // cation transport // inferred from electronic annotation///0006816 // calcium ion transport // inferred from reviewed computational analysis///0006882 // cellular zinc ion homeostasis …
267586_at	AT2G41950		0.00699206	0.000538879	3.63066
267580_at	AT2G41990		0.0165482	0.00318823	5.69452
267636_at	AT2G42110		0.0103735	0.00125748	6.13097
267635_at	AT2G42220		0.00487345	0.000214807	3.58372	0010103 // stomatal complex morphogenesis // inferred from reviewed computational analysis///0019344 // cysteine biosynthetic process // inferred from reviewed computational analysis///0019684 // photosynthesis, light reaction // inferred from reviewed computational analysis
263981_at	AT2G42870	PAR1	0.0192656	0.00419694	3.443	0009641 // shade avoidance // inferred from expression pattern///0009641 // shade avoidance // inferred from mutant phenotype///0032502 // developmental process // inferred from mutant phenotype///0045892 // negative regulation of transcription, DNA-dependent // inferred from mutant phenotype
266395_at	AT2G43100	IPMI2	0.00782865	0.00068271	24.4178	0008152 // metabolic process // inferred from electronic annotation///0008152 // metabolic process // inferred from sequence or structural similarity///0009098 // leucine biosynthetic process // inferred from electronic annotation///0009684 // indoleacetic acid biosynthetic process // inferred from reviewed computational analysis///0019344 // cysteine biosynthetic process // inferred from reviewe…
266439_s_at	AT2G43200		0.00882975	0.000887956	3.26556	0032259 // methylation // inferred from electronic annotation
260542_at	AT2G43560		0.00736259	0.000592658	3.42518	0000413 // protein peptidyl-prolyl isomerization // not recorded///0006098 // pentose-phosphate shunt // inferred from reviewed computational analysis///0006364 // rRNA processing // inferred from reviewed computational analysis///0006457 // protein folding // inferred from electronic annotation///0009657 // plastid organization // inferred from reviewed computational analysis///0010027 // thylak…
267233_s_at	AT2G43910///AT2G43920	HOL1///HOL2	0.00306873	4.75923e-05	4.82452	0006952 // defense response // inferred from mutant phenotype///0008152 // metabolic process // inferred from electronic annotation///0019762 // glucosinolate catabolic process // inferred from direct assay///0032259 // methylation // inferred from electronic annotation
267237_s_at	AT2G44040///AT3G59890		0.00285464	2.27896e-05	3.18127	0008652 // cellular amino acid biosynthetic process // inferred from electronic annotation///0009085 // lysine biosynthetic process // inferred from electronic annotation///0009089 // lysine biosynthetic process via diaminopimelate // inferred from electronic annotation///0009089 // lysine biosynthetic process via diaminopimelate // inferred from sequence or structural similarity///0019877 // dia…
267385_at	AT2G44380		0.0206612	0.00479563	6.44423	0010167 // response to nitrate // inferred from reviewed computational analysis///0015706 // nitrate transport // inferred from reviewed computational analysis///0055114 // oxidation-reduction process // inferred from electronic annotation
266884_at	AT2G44790	UCC2	0.00601355	0.000380653	3.69957	0009611 // response to wounding // inferred from reviewed computational analysis///0009805 // coumarin biosynthetic process // inferred from reviewed computational analysis///0010167 // response to nitrate // inferred from reviewed computational analysis///0015706 // nitrate transport // inferred from reviewed computational analysis///0055114 // oxidation-reduction process // inferred from electr…
266813_at	AT2G44920		0.00371409	0.000103792	5.3035	0006098 // pentose-phosphate shunt // inferred from reviewed computational analysis///0006636 // unsaturated fatty acid biosynthetic process // inferred from reviewed computational analysis///0009409 // response to cold // inferred from reviewed computational analysis///0015979 // photosynthesis // inferred from reviewed computational analysis///0015995 // chlorophyll biosynthetic process // infe…
266125_at	AT2G45050	GATA2	0.0176506	0.00361154	3.22225	0006351 // transcription, DNA-dependent // inferred from electronic annotation///0006355 // regulation of transcription, DNA-dependent // inferred from electronic annotation///0009416 // response to light stimulus // inferred from expression pattern///0045893 // positive regulation of transcription, DNA-dependent // inferred from electronic annotation
245139_at	AT2G45430	AHL22	0.0101036	0.00118003	3.26074	0000041 // transition metal ion transport // inferred from reviewed computational analysis///0009640 // photomorphogenesis // inferred from mutant phenotype///0009647 // skotomorphogenesis // inferred from mutant phenotype///0010228 // vegetative to reproductive phase transition of meristem // inferred from mutant phenotype///0010359 // regulation of anion channel activity // inferred from review…
251395_at	AT2G45470	FLA8	0.0111198	0.00145731	3.77459	0007389 // pattern specification process // inferred from reviewed computational analysis///0008361 // regulation of cell size // inferred from reviewed computational analysis///0009664 // plant-type cell wall organization // inferred from reviewed computational analysis///0009832 // plant-type cell wall biogenesis // inferred from reviewed computational analysis///0009926 // auxin polar transpor…
266322_at	AT2G46690		0.00483188	0.000211782	3.5662	0006816 // calcium ion transport // inferred from reviewed computational analysis///0009733 // response to auxin stimulus // inferred from sequence or structural similarity
260582_at	AT2G47200		0.0210957	0.00498187	3.93977
260531_at	AT2G47240	CER8	0.00299442	3.43883e-05	4.99453	0001676 // long-chain fatty acid metabolic process // inferred from direct assay///0001676 // long-chain fatty acid metabolic process // inferred from sequence or structural similarity///0006629 // lipid metabolic process // inferred from electronic annotation///0006631 // fatty acid metabolic process // traceable author statement///0006633 // fatty acid biosynthetic process // inferred from sequ…
260527_at	AT2G47270		0.0224066	0.00550016	3.03736	0006351 // transcription, DNA-dependent // inferred from electronic annotation///0006355 // regulation of transcription, DNA-dependent // traceable author statement///0030154 // cell differentiation // inferred from electronic annotation///2000280 // regulation of root development // inferred from mutant phenotype
266509_at	AT2G47940	DEGP2	0.0108882	0.00139967	3.62999	0006508 // proteolysis // inferred from electronic annotation///0006508 // proteolysis // inferred from sequence or structural similarity///0009658 // chloroplast organization // inferred from mutant phenotype///0010075 // regulation of meristem growth // inferred from reviewed computational analysis///0010206 // photosystem II repair // inferred from direct assay///0019288 // isopentenyl diphosp…
262349_at	AT2G48130		0.00567968	0.00032432	4.88027	0000041 // transition metal ion transport // inferred from reviewed computational analysis///0006508 // proteolysis // inferred from electronic annotation///0006826 // iron ion transport // inferred from reviewed computational analysis///0006869 // lipid transport // inferred from electronic annotation///0006869 // lipid transport // inferred from sequence or structural similarity///0010106 // ce…
262317_at	AT2G48140	EDA4	0.0178385	0.00367802	3.35835	0000041 // transition metal ion transport // inferred from reviewed computational analysis///0006869 // lipid transport // inferred from sequence or structural similarity///0009561 // megagametogenesis // inferred from mutant phenotype
259276_at	AT3G01190		0.00343175	8.55402e-05	12.0933	0000041 // transition metal ion transport // inferred from reviewed computational analysis///0006826 // iron ion transport // inferred from reviewed computational analysis///0006979 // response to oxidative stress // inferred from electronic annotation///0010106 // cellular response to iron ion starvation // inferred from reviewed computational analysis///0010167 // response to nitrate // inferre…
259116_at	AT3G01350		0.0141605	0.00237616	3.47188	0006810 // transport // inferred from electronic annotation///0006857 // oligopeptide transport // inferred from electronic annotation///0006857 // oligopeptide transport // inferred from sequence or structural similarity
258956_at	AT3G01440	PQL1	0.00864059	0.00084695	17.3581	0000023 // maltose metabolic process // inferred from reviewed computational analysis///0009767 // photosynthetic electron transport chain // inferred from mutant phenotype///0015979 // photosynthesis // inferred from electronic annotation///0019252 // starch biosynthetic process // inferred from reviewed computational analysis///0019684 // photosynthesis, light reaction // traceable author state…
259193_at	AT3G01480	CYP38	0.00285464	2.55782e-05	3.47492	0000165 // MAPK cascade // inferred from reviewed computational analysis///0000413 // protein peptidyl-prolyl isomerization // inferred from electronic annotation///0006098 // pentose-phosphate shunt // inferred from reviewed computational analysis///0006364 // rRNA processing // inferred from reviewed computational analysis///0006457 // protein folding // inferred from electronic annotation///00…
259161_at	AT3G01500	CA1	0.00427138	0.000161031	8.96352	0000165 // MAPK cascade // inferred from reviewed computational analysis///0006098 // pentose-phosphate shunt // inferred from reviewed computational analysis///0006612 // protein targeting to membrane // inferred from reviewed computational analysis///0009409 // response to cold // inferred from expression pattern///0009409 // response to cold // inferred from reviewed computational analysis///0…
259179_at	AT3G01660		0.0214509	0.00511812	3.39439	0000023 // maltose metabolic process // inferred from reviewed computational analysis///0008152 // metabolic process // inferred from electronic annotation///0016556 // mRNA modification // inferred from reviewed computational analysis///0019252 // starch biosynthetic process // inferred from reviewed computational analysis///0032259 // methylation // inferred from electronic annotation
259181_at	AT3G01690		0.00993823	0.00113198	3.22989	0008284 // positive regulation of cell proliferation // inferred from reviewed computational analysis///0019344 // cysteine biosynthetic process // inferred from reviewed computational analysis
259000_at	AT3G01860		0.00749993	0.000615278	4.61826	0006612 // protein targeting to membrane // inferred from reviewed computational analysis///0009963 // positive regulation of flavonoid biosynthetic process // inferred from reviewed computational analysis///0010363 // regulation of plant-type hypersensitive response // inferred from reviewed computational analysis///0046686 // response to cadmium ion // inferred from expression pattern
258859_at	AT3G02120		0.00305702	4.39915e-05	7.0755	0000226 // microtubule cytoskeleton organization // inferred from reviewed computational analysis///0000911 // cytokinesis by cell plate formation // inferred from reviewed computational analysis///0010583 // response to cyclopentenone // inferred from reviewed computational analysis///0051329 // interphase of mitotic cell cycle // inferred from reviewed computational analysis
258497_at	AT3G02380	COL2	0.0233303	0.00593447	5.90747	0006351 // transcription, DNA-dependent // inferred from electronic annotation///0006355 // regulation of transcription, DNA-dependent // inferred from electronic annotation///0009658 // chloroplast organization // inferred from mutant phenotype///0009909 // regulation of flower development // inferred from mutant phenotype
258480_at	AT3G02640		0.00299442	3.7427e-05	8.63872	0016572 // histone phosphorylation // inferred from reviewed computational analysis
258618_at	AT3G02885	GASA5	0.019838	0.00442436	4.59521	0009408 // response to heat // inferred from mutant phenotype///0009739 // response to gibberellin stimulus // inferred from sequence or structural similarity///0009740 // gibberellic acid mediated signaling pathway // inferred from electronic annotation///0009751 // response to salicylic acid stimulus // inferred from mutant phenotype///0010286 // heat acclimation // inferred from mutant phenoty…
258867_at	AT3G03130		0.0151765	0.00268509	3.38965	0006270 // DNA replication initiation // inferred from reviewed computational analysis///0006275 // regulation of DNA replication // inferred from reviewed computational analysis///0008283 // cell proliferation // inferred from reviewed computational analysis///0051726 // regulation of cell cycle // inferred from reviewed computational analysis
259172_at	AT3G03630	CS26	0.0107448	0.00134879	3.11721	0006535 // cysteine biosynthetic process from serine // inferred from electronic annotation///0008652 // cellular amino acid biosynthetic process // inferred from electronic annotation///0009643 // photosynthetic acclimation // inferred from mutant phenotype///0010310 // regulation of hydrogen peroxide metabolic process // inferred from mutant phenotype///0015979 // photosynthesis // inferred fro…
259344_at	AT3G03710	RIF10	0.015935	0.00298	5.81188	0006364 // rRNA processing // inferred from electronic annotation///0006396 // RNA processing // inferred from electronic annotation///0006397 // mRNA processing // inferred from electronic annotation///0006401 // RNA catabolic process // inferred from genetic interaction///0006402 // mRNA catabolic process // inferred from electronic annotation///0008033 // tRNA processing // inferred from elect…
258589_at	AT3G04290	LTL1	0.0274967	0.00784009	3.42115	0006629 // lipid metabolic process // inferred from electronic annotation///0009751 // response to salicylic acid stimulus // inferred from direct assay///0010103 // stomatal complex morphogenesis // inferred from reviewed computational analysis///0010226 // response to lithium ion // inferred from mutant phenotype///0016042 // lipid catabolic process // inferred from electronic annotation///0042…
258895_at	AT3G05600		0.0174493	0.0035406	5.76165	0008152 // metabolic process // inferred from electronic annotation
258897_at	AT3G05730		0.023981	0.00622561	6.82881	0006952 // defense response // inferred from electronic annotation///0019761 // glucosinolate biosynthetic process // inferred from reviewed computational analysis///0031640 // killing of cells of other organism // inferred from electronic annotation///0050832 // defense response to fungus // inferred from electronic annotation
258751_at	AT3G05890	RCI2B	0.0302231	0.00931316	5.06254	0009409 // response to cold // inferred from mutant phenotype
258468_at	AT3G06070		0.0216311	0.00519865	5.368
256400_at	AT3G06140		0.00707438	0.000554006	3.09328	0016567 // protein ubiquitination // inferred from electronic annotation
258522_at	AT3G06660		0.00942086	0.00102297	3.05643	0043086 // negative regulation of catalytic activity // inferred from electronic annotation
258534_at	AT3G06730	TRX z	0.0155299	0.00282155	3.39544	0006364 // rRNA processing // inferred from reviewed computational analysis///0006399 // tRNA metabolic process // inferred from reviewed computational analysis///0006662 // glycerol ether metabolic process // inferred from electronic annotation///0009657 // plastid organization // inferred from mutant phenotype///0009658 // chloroplast organization // inferred from reviewed computational analysi…
258527_at	AT3G06850	BCE2	0.0214476	0.00511596	3.16055	0006629 // lipid metabolic process // inferred from electronic annotation///0006631 // fatty acid metabolic process // inferred from electronic annotation///0006633 // fatty acid biosynthetic process // inferred from electronic annotation///0008152 // metabolic process // inferred from electronic annotation///0009646 // response to absence of light // inferred from expression pattern///0009744 //…
258554_at	AT3G06980		0.0068946	0.000516896	3.91962	0006364 // rRNA processing // inferred from reviewed computational analysis///0006399 // tRNA metabolic process // inferred from reviewed computational analysis///0006655 // phosphatidylglycerol biosynthetic process // inferred from reviewed computational analysis///0006952 // defense response // inferred from electronic annotation///0006968 // cellular defense response // inferred from sequence …
258552_at	AT3G07010		0.0104548	0.00128082	3.05784	0045490 // pectin catabolic process // inferred from electronic annotation
259036_at	AT3G09220	LAC7	0.00343175	7.53468e-05	5.23636	0000041 // transition metal ion transport // inferred from reviewed computational analysis///0006826 // iron ion transport // inferred from reviewed computational analysis///0010106 // cellular response to iron ion starvation // inferred from reviewed computational analysis///0010167 // response to nitrate // inferred from reviewed computational analysis///0015706 // nitrate transport // inferred…
258938_at	AT3G10080		0.00576446	0.000337461	3.89732
258935_at	AT3G10120		0.0295701	0.00895638	4.18008
256427_at	AT3G11090	LBD21	0.0178322	0.00367275	3.05795
259290_at	AT3G11520	CYCB1;3	0.0244123	0.00642059	5.07752	0000079 // regulation of cyclin-dependent protein serine/threonine kinase activity // inferred from electronic annotation///0000087 // M phase of mitotic cell cycle // inferred from reviewed computational analysis///0000280 // nuclear division // inferred from reviewed computational analysis///0000911 // cytokinesis by cell plate formation // inferred from reviewed computational analysis///000627…
256262_at	AT3G12150		0.0203363	0.00463922	3.54167
257190_at	AT3G13120		0.00285464	2.32229e-05	3.29705	0006364 // rRNA processing // inferred from reviewed computational analysis///0006412 // translation // inferred from electronic annotation///0006412 // translation // inferred from sequence or structural similarity///0009902 // chloroplast relocation // inferred from reviewed computational analysis///0010027 // thylakoid membrane organization // inferred from reviewed computational analysis///00…
256983_at	AT3G13470		0.00924017	0.000975898	3.32082	0006457 // protein folding // inferred from electronic annotation///0009658 // chloroplast organization // inferred from reviewed computational analysis///0042026 // protein refolding // inferred from electronic annotation///0044267 // cellular protein metabolic process // inferred from electronic annotation///0048481 // ovule development // inferred from reviewed computational analysis
256772_at	AT3G13750	BGAL1	0.00356682	9.71561e-05	3.41214	0005975 // carbohydrate metabolic process // inferred from electronic annotation///0008152 // metabolic process // inferred from electronic annotation///0032880 // regulation of protein localization // inferred from reviewed computational analysis///0042744 // hydrogen peroxide catabolic process // inferred from reviewed computational analysis///0048767 // root hair elongation // inferred from re…
257005_at	AT3G14190		0.0123164	0.00181482	5.7681	0000911 // cytokinesis by cell plate formation // inferred from reviewed computational analysis///0006275 // regulation of DNA replication // inferred from reviewed computational analysis///0008283 // cell proliferation // inferred from reviewed computational analysis///0009909 // regulation of flower development // inferred from reviewed computational analysis///0010389 // regulation of G2/M tra…
258355_at	AT3G14330		0.0104455	0.0012759	3.42872	0016556 // mRNA modification // inferred from reviewed computational analysis
258402_at	AT3G15450		0.00804018	0.000718711	5.53141	0009744 // response to sucrose stimulus // inferred from reviewed computational analysis///0009750 // response to fructose stimulus // inferred from reviewed computational analysis
257290_at	AT3G15550		0.0130598	0.00204393	4.83469	0000226 // microtubule cytoskeleton organization // inferred from reviewed computational analysis///0000724 // double-strand break repair via homologous recombination // inferred from reviewed computational analysis///0000911 // cytokinesis by cell plate formation // inferred from reviewed computational analysis///0006306 // DNA methylation // inferred from reviewed computational analysis///00063…
258225_at	AT3G15630		0.007326	0.000588302	5.02822	0009744 // response to sucrose stimulus // inferred from reviewed computational analysis///0009750 // response to fructose stimulus // inferred from reviewed computational analysis
257800_at	AT3G15900		0.00227689	7.31365e-06	3.71469
258055_at	AT3G16250	NDF4	0.00466116	0.000193085	3.46353	0006098 // pentose-phosphate shunt // inferred from reviewed computational analysis///0009773 // photosynthetic electron transport in photosystem I // inferred from mutant phenotype///0019252 // starch biosynthetic process // inferred from reviewed computational analysis///0019288 // isopentenyl diphosphate biosynthetic process, mevalonate-independent pathway // inferred from reviewed computation…
259328_at	AT3G16440	ATMLP-300B	0.00933792	0.000996928	3.0808	0000041 // transition metal ion transport // inferred from reviewed computational analysis///0009793 // embryo development ending in seed dormancy // inferred from mutant phenotype
258418_at	AT3G16660		0.0142343	0.00240067	3.59383
258419_at	AT3G16670		0.00576446	0.000339177	9.93488	0006979 // response to oxidative stress // inferred from mutant phenotype
257879_at	AT3G17160		0.00651788	0.00045013	3.20641
256655_at	AT3G18890		0.0034801	9.03226e-05	4.4049	0006810 // transport // inferred from electronic annotation///0010103 // stomatal complex morphogenesis // inferred from reviewed computational analysis///0015031 // protein transport // inferred from electronic annotation///0016556 // mRNA modification // inferred from reviewed computational analysis///0019684 // photosynthesis, light reaction // inferred from reviewed computational analysis
256918_s_at	AT3G18960///AT4G01580		0.00590153	0.000362506	3.50324	0006351 // transcription, DNA-dependent // inferred from electronic annotation///0006355 // regulation of transcription, DNA-dependent // inferred from electronic annotation///0006355 // regulation of transcription, DNA-dependent // inferred from sequence or structural similarity
256891_at	AT3G19030		0.0118801	0.00169738	4.71667	0006612 // protein targeting to membrane // inferred from reviewed computational analysis///0009963 // positive regulation of flavonoid biosynthetic process // inferred from reviewed computational analysis///0010363 // regulation of plant-type hypersensitive response // inferred from reviewed computational analysis
258023_at	AT3G19450	ATCAD4	0.0119207	0.00171236	3.40345	0009699 // phenylpropanoid biosynthetic process // inferred from electronic annotation///0009809 // lignin biosynthetic process // inferred from genetic interaction///0009809 // lignin biosynthetic process // traceable author statement///0055114 // oxidation-reduction process // inferred from electronic annotation///0080167 // response to karrikin // inferred from expression pattern
257021_at	AT3G19710	BCAT4	0.0044823	0.00018026	9.90119	0008152 // metabolic process // inferred from electronic annotation///0009081 // branched-chain amino acid metabolic process // inferred from electronic annotation///0009407 // toxin catabolic process // inferred from reviewed computational analysis///0009416 // response to light stimulus // inferred from expression pattern///0009611 // response to wounding // inferred from expression pattern///0…
257964_at	AT3G19850		0.00259785	1.17426e-05	10.9544	0009416 // response to light stimulus // inferred from electronic annotation///0009416 // response to light stimulus // inferred from sequence or structural similarity///0009637 // response to blue light // inferred from reviewed computational analysis///0010155 // regulation of proton transport // inferred from reviewed computational analysis///0016567 // protein ubiquitination // inferred from …
257668_at	AT3G20460		0.0216576	0.0052078	3.00672	0006810 // transport // inferred from electronic annotation///0008643 // carbohydrate transport // inferred from electronic annotation///0055085 // transmembrane transport // inferred from electronic annotation
256698_at	AT3G20680		0.00815724	0.000743092	3.33033	0009965 // leaf morphogenesis // inferred from reviewed computational analysis///0030154 // cell differentiation // inferred from reviewed computational analysis///0045893 // positive regulation of transcription, DNA-dependent // inferred from reviewed computational analysis
257974_at	AT3G20820		0.00349795	9.16701e-05	3.1519	0006952 // defense response // inferred from sequence or structural similarity///0007165 // signal transduction // inferred by curator
258038_at	AT3G21260		0.00590153	0.000363585	3.61102	0006661 // phosphatidylinositol biosynthetic process // inferred from reviewed computational analysis///0046836 // glycolipid transport // inferred from electronic annotation
256894_at	AT3G21870	CYCP2;1	0.0107411	0.00134764	10.138	0000079 // regulation of cyclin-dependent protein serine/threonine kinase activity // inferred from electronic annotation///0007049 // cell cycle // inferred from electronic annotation///0010440 // stomatal lineage progression // inferred from reviewed computational analysis///0051301 // cell division // inferred from electronic annotation///0051726 // regulation of cell cycle // inferred from se…
256796_at	AT3G22210		0.00306873	4.63377e-05	6.10098	0000023 // maltose metabolic process // inferred from reviewed computational analysis///0006098 // pentose-phosphate shunt // inferred from reviewed computational analysis///0019252 // starch biosynthetic process // inferred from reviewed computational analysis
256766_at	AT3G22231	PCC1	0.00344654	8.81814e-05	3.10014	0009617 // response to bacterium // inferred from expression pattern///0009620 // response to fungus // inferred from mutant phenotype
256617_at	AT3G22240		0.00620894	0.000408143	3.9727
256937_at	AT3G22620		0.00935563	0.00101213	3.11039	0006869 // lipid transport // inferred from sequence or structural similarity///0010167 // response to nitrate // inferred from reviewed computational analysis///0015706 // nitrate transport // inferred from reviewed computational analysis
257924_at	AT3G23190		0.00513547	0.000245578	3.38278	0006826 // iron ion transport // inferred from reviewed computational analysis///0009736 // cytokinin mediated signaling pathway // inferred from reviewed computational analysis///0010106 // cellular response to iron ion starvation // inferred from reviewed computational analysis///0010167 // response to nitrate // inferred from reviewed computational analysis///0015706 // nitrate transport // in…
258098_at	AT3G23670	KINESIN-12B	0.00655312	0.000461775	3.97177	0000914 // phragmoplast assembly // inferred from genetic interaction///0007018 // microtubule-based movement // inferred from electronic annotation///0048451 // petal formation // inferred from reviewed computational analysis///0048453 // sepal formation // inferred from reviewed computational analysis///0055046 // microgametogenesis // inferred from mutant phenotype///0080175 // phragmoplast mi…
256914_at	AT3G23880		0.00307218	5.13818e-05	17.3577
256864_at	AT3G23890	TOPII	0.0115492	0.0015811	5.41327	0000226 // microtubule cytoskeleton organization // inferred from reviewed computational analysis///0000712 // resolution of meiotic recombination intermediates // not recorded///0000819 // sister chromatid segregation // not recorded///0000911 // cytokinesis by cell plate formation // inferred from reviewed computational analysis///0006200 // ATP catabolic process // not recorded///0006259 // DN…
257162_s_at	AT3G24290///AT3G24300	AMT1;3	0.0102829	0.00122764	9.93919	0006810 // transport // inferred from sequence or structural similarity///0010311 // lateral root formation // inferred from mutant phenotype///0015695 // organic cation transport // inferred from direct assay///0015695 // organic cation transport // inferred from sequence or structural similarity///0015695 // organic cation transport // inferred from mutant phenotype///0015696 // ammonium transp…
256728_at	AT3G25660		0.00562905	0.000312113	3.12467	0006412 // translation // inferred from electronic annotation///0006655 // phosphatidylglycerol biosynthetic process // inferred from reviewed computational analysis
257642_at	AT3G25710	BHLH32	0.0264283	0.00731592	3.84477	0006351 // transcription, DNA-dependent // inferred from electronic annotation///0006355 // regulation of transcription, DNA-dependent // traceable author statement///0009718 // anthocyanin-containing compound biosynthetic process // inferred from mutant phenotype///0016036 // cellular response to phosphate starvation // inferred from mutant phenotype///0048364 // root development // inferred fro…
256994_s_at	AT3G25820///AT3G25830	ATTPS-CIN	0.0137264	0.00225106	9.18074	0008152 // metabolic process // inferred from electronic annotation///0016099 // monoterpenoid biosynthetic process // inferred from direct assay///0016099 // monoterpenoid biosynthetic process // inferred from sequence or structural similarity///0016114 // terpenoid biosynthetic process // inferred from electronic annotation
258080_at	AT3G25930		0.0315079	0.00993631	6.08131	0000041 // transition metal ion transport // inferred from reviewed computational analysis///0002238 // response to molecule of fungal origin // inferred from reviewed computational analysis///0006826 // iron ion transport // inferred from reviewed computational analysis///0006950 // response to stress // inferred from electronic annotation///0010106 // cellular response to iron ion starvation //…
258067_at	AT3G25980	MAD2	0.0199672	0.00448084	4.59077	0007049 // cell cycle // inferred from electronic annotation///0007067 // mitosis // inferred from electronic annotation///0007094 // mitotic spindle assembly checkpoint // inferred from direct assay///0007094 // mitotic spindle assembly checkpoint // inferred from sequence or structural similarity///0007346 // regulation of mitotic cell cycle // inferred from mutant phenotype///0008283 // cell p…
257615_at	AT3G26510		0.0110726	0.00144969	4.27139
258253_at	AT3G26760		0.00221523	1.31051e-06	4.61152	0008152 // metabolic process // inferred from electronic annotation///0009733 // response to auxin stimulus // inferred from reviewed computational analysis///0009741 // response to brassinosteroid stimulus // inferred from reviewed computational analysis///0055114 // oxidation-reduction process // inferred from electronic annotation
257740_at	AT3G27330		0.0270385	0.0076369	3.20911
258239_at	AT3G27690	LHCB2.3	0.0036878	0.000102821	11.2002	0006364 // rRNA processing // inferred from reviewed computational analysis///0009637 // response to blue light // inferred from expression pattern///0009637 // response to blue light // inferred from reviewed computational analysis///0009644 // response to high light intensity // inferred from reviewed computational analysis///0009744 // response to sucrose stimulus // inferred from reviewed com…
252724_at	AT3G43540		0.00436849	0.000168542	3.99966
246330_at	AT3G43600	AAO2	0.00748625	0.000612232	3.32046	0009688 // abscisic acid biosynthetic process // inferred from reviewed computational analysis///0009851 // auxin biosynthetic process // inferred from electronic annotation///0055114 // oxidation-reduction process // inferred from electronic annotation
252692_at	AT3G43960		0.0248906	0.00663358	4.08435	0006508 // proteolysis // inferred from electronic annotation///0006508 // proteolysis // inferred from sequence or structural similarity///0016132 // brassinosteroid biosynthetic process // inferred from reviewed computational analysis///0048767 // root hair elongation // inferred from mutant phenotype
246339_at	AT3G44890	RPL9	0.00512846	0.000243146	3.46261	0006412 // translation // inferred from electronic annotation///0006412 // translation // inferred from sequence or structural similarity///0006412 // translation // traceable author statement///0019288 // isopentenyl diphosphate biosynthetic process, mevalonate-independent pathway // inferred from reviewed computational analysis///0042254 // ribosome biogenesis // inferred from sequence or struc…
252607_at	AT3G44990	XTR8	0.0144371	0.00245409	6.0412	0005975 // carbohydrate metabolic process // inferred from electronic annotation///0006073 // cellular glucan metabolic process // inferred from electronic annotation///0008152 // metabolic process // inferred from electronic annotation///0016998 // cell wall macromolecule catabolic process // inferred from mutant phenotype///0042546 // cell wall biogenesis // inferred from reviewed computational…
252603_at	AT3G45050		0.00295157	3.14082e-05	3.12208	0000023 // maltose metabolic process // inferred from reviewed computational analysis///0010027 // thylakoid membrane organization // inferred from reviewed computational analysis///0019252 // starch biosynthetic process // inferred from reviewed computational analysis
252612_at	AT3G45160		0.0231364	0.00582007	9.84047	0019761 // glucosinolate biosynthetic process // inferred from reviewed computational analysis
252562_s_at	AT3G45930///AT3G46320		0.00968436	0.00107383	3.56213	0006334 // nucleosome assembly // inferred from electronic annotation///0006334 // nucleosome assembly // inferred from sequence or structural similarity///0009414 // response to water deprivation // inferred from expression pattern///0051276 // chromosome organization // inferred from sequence or structural similarity
252441_at	AT3G46780	PTAC16	0.00260745	1.30137e-05	3.69887	0006098 // pentose-phosphate shunt // inferred from reviewed computational analysis///0006364 // rRNA processing // inferred from reviewed computational analysis///0007623 // circadian rhythm // inferred from expression pattern///0009637 // response to blue light // inferred from reviewed computational analysis///0009902 // chloroplast relocation // inferred from reviewed computational analysis//…
252502_at	AT3G46900	COPT2	0.00306873	4.65035e-05	7.69	0006810 // transport // inferred from electronic annotation///0006811 // ion transport // inferred from electronic annotation///0006825 // copper ion transport // inferred from sequence or structural similarity///0015678 // high-affinity copper ion transport // inferred from genetic interaction///0035434 // copper ion transmembrane transport // inferred from electronic annotation
252463_at	AT3G47070		0.00584226	0.000355054	3.5819	0006364 // rRNA processing // inferred from reviewed computational analysis///0009637 // response to blue light // inferred from reviewed computational analysis///0009902 // chloroplast relocation // inferred from reviewed computational analysis///0010027 // thylakoid membrane organization // inferred from reviewed computational analysis///0010114 // response to red light // inferred from reviewe…
252367_at	AT3G48360	BT2	0.00702319	0.000545906	9.10265	0006355 // regulation of transcription, DNA-dependent // inferred from electronic annotation///0006355 // regulation of transcription, DNA-dependent // traceable author statement///0007623 // circadian rhythm // inferred from expression pattern///0009409 // response to cold // inferred from expression pattern///0009553 // embryo sac development // inferred from genetic interaction///0009555 // po…
252366_at	AT3G48420		0.00567968	0.000323298	3.61436	0006098 // pentose-phosphate shunt // inferred from reviewed computational analysis///0008152 // metabolic process // inferred from electronic annotation///0010027 // thylakoid membrane organization // inferred from reviewed computational analysis///0010103 // stomatal complex morphogenesis // inferred from reviewed computational analysis///0016117 // carotenoid biosynthetic process // inferred f…
252317_at	AT3G48720		0.00853858	0.000815145	6.06803	0010143 // cutin biosynthetic process // inferred from mutant phenotype///0033494 // ferulate metabolic process // inferred from mutant phenotype
252318_at	AT3G48730	GSA2	0.0036422	0.000100864	4.66715	0006098 // pentose-phosphate shunt // inferred from reviewed computational analysis///0006364 // rRNA processing // inferred from reviewed computational analysis///0006779 // porphyrin-containing compound biosynthetic process // traceable author statement///0006782 // protoporphyrinogen IX biosynthetic process // inferred from electronic annotation///0009073 // aromatic amino acid family biosynth…
252272_at	AT3G49670	BAM2	0.00517315	0.000254902	3.29169	0000271 // polysaccharide biosynthetic process // inferred from reviewed computational analysis///0006468 // protein phosphorylation // inferred from electronic annotation///0006468 // protein phosphorylation // inferred from sequence or structural similarity///0007169 // transmembrane receptor protein tyrosine kinase signaling pathway // inferred from sequence or structural similarity///0007275 …
252248_at	AT3G49750	AtRLP44	0.00865441	0.000855655	4.08713	0007165 // signal transduction // inferred by curator
252215_at	AT3G50240	KICP-02	0.0115048	0.00156319	3.46936	0007018 // microtubule-based movement // inferred from electronic annotation
252172_at	AT3G50640		0.0076999	0.000649491	3.86692
252183_at	AT3G50740	UGT72E1	0.0066891	0.000489027	4.02637	0006520 // cellular amino acid metabolic process // inferred from reviewed computational analysis///0006569 // tryptophan catabolic process // inferred from reviewed computational analysis///0008152 // metabolic process // inferred from electronic annotation///0009636 // response to toxic substance // inferred from electronic annotation///0009684 // indoleacetic acid biosynthetic process // infer…
252077_at	AT3G51720		0.0115257	0.00157566	5.97532	0000226 // microtubule cytoskeleton organization // inferred from reviewed computational analysis///0000911 // cytokinesis by cell plate formation // inferred from reviewed computational analysis///0008283 // cell proliferation // inferred from reviewed computational analysis///0042127 // regulation of cell proliferation // inferred from reviewed computational analysis///0051322 // anaphase // in…
252078_at	AT3G51740	IMK2	0.00445746	0.000177855	3.79984	0006468 // protein phosphorylation // inferred from electronic annotation///0006468 // protein phosphorylation // inferred from sequence or structural similarity///0007169 // transmembrane receptor protein tyrosine kinase signaling pathway // inferred from sequence or structural similarity///0008283 // cell proliferation // inferred from reviewed computational analysis
252040_at	AT3G52060		0.00307218	4.9304e-05	5.37499
252036_at	AT3G52070		0.0197667	0.00439754	4.22002	0006661 // phosphatidylinositol biosynthetic process // inferred from reviewed computational analysis
252089_at	AT3G52110		0.00665736	0.000479864	4.36344	0000226 // microtubule cytoskeleton organization // inferred from reviewed computational analysis///0000911 // cytokinesis by cell plate formation // inferred from reviewed computational analysis
252032_at	AT3G52150		0.00537488	0.000278655	3.25255	0009773 // photosynthetic electron transport in photosystem I // inferred from reviewed computational analysis///0019288 // isopentenyl diphosphate biosynthetic process, mevalonate-independent pathway // inferred from reviewed computational analysis///0045036 // protein targeting to chloroplast // inferred from reviewed computational analysis
251968_at	AT3G53100		0.00489027	0.000216459	4.26252	0006629 // lipid metabolic process // inferred from electronic annotation///0016042 // lipid catabolic process // inferred from electronic annotation
251969_at	AT3G53130	LUT1	0.0138719	0.00229564	3.12963	0006636 // unsaturated fatty acid biosynthetic process // inferred from reviewed computational analysis///0009965 // leaf morphogenesis // inferred from reviewed computational analysis///0010103 // stomatal complex morphogenesis // inferred from reviewed computational analysis///0015995 // chlorophyll biosynthetic process // inferred from reviewed computational analysis///0016117 // carotenoid bi…
251982_at	AT3G53190		0.00571238	0.000329552	5.74588	0045490 // pectin catabolic process // inferred from electronic annotation
251920_at	AT3G53900	UPP	0.00343175	8.08816e-05	4.93285	0006223 // uracil salvage // inferred from electronic annotation///0008152 // metabolic process // inferred from electronic annotation///0009116 // nucleoside metabolic process // inferred from electronic annotation///0009116 // nucleoside metabolic process // inferred from sequence or structural similarity///0016036 // cellular response to phosphate starvation // inferred from expression pattern…
251918_at	AT3G54040		0.012544	0.0018833	3.57367	0000041 // transition metal ion transport // inferred from reviewed computational analysis
251846_at	AT3G54560	HTA11	0.00343175	8.0928e-05	3.57596	0006334 // nucleosome assembly // inferred from electronic annotation///0006338 // chromatin remodeling // inferred from reviewed computational analysis///0009908 // flower development // inferred from genetic interaction///0009909 // regulation of flower development // inferred from reviewed computational analysis///0010468 // regulation of gene expression // inferred from genetic interaction///…
251784_at	AT3G55330	PPL1	0.0244487	0.0064365	3.54587	0006098 // pentose-phosphate shunt // inferred from reviewed computational analysis///0006364 // rRNA processing // inferred from reviewed computational analysis///0009657 // plastid organization // inferred from reviewed computational analysis///0010103 // stomatal complex morphogenesis // inferred from reviewed computational analysis///0010207 // photosystem II assembly // inferred from reviewe…
251762_at	AT3G55800	SBPASE	0.00285464	2.52743e-05	5.54913	0000023 // maltose metabolic process // inferred from reviewed computational analysis///0000165 // MAPK cascade // inferred from reviewed computational analysis///0005975 // carbohydrate metabolic process // inferred from electronic annotation///0005975 // carbohydrate metabolic process // inferred from sequence or structural similarity///0005986 // sucrose biosynthetic process // inferred from d…
251720_at	AT3G56160		0.00809591	0.000730327	4.28428	0006810 // transport // inferred from electronic annotation///0006814 // sodium ion transport // inferred from electronic annotation///0035725 // sodium ion transmembrane transport // inferred from electronic annotation
251714_at	AT3G56370		0.0100679	0.00117479	3.22344	0000272 // polysaccharide catabolic process // inferred from reviewed computational analysis///0005982 // starch metabolic process // inferred from reviewed computational analysis///0006468 // protein phosphorylation // inferred from electronic annotation///0006468 // protein phosphorylation // inferred from sequence or structural similarity///0007169 // transmembrane receptor protein tyrosine ki…
251665_at	AT3G57040	ARR9	0.0103318	0.00124538	3.95933	0000160 // phosphorelay signal transduction system // inferred from electronic annotation///0000160 // phosphorelay signal transduction system // inferred from physical interaction///0006351 // transcription, DNA-dependent // inferred from electronic annotation///0006355 // regulation of transcription, DNA-dependent // inferred from electronic annotation///0006355 // regulation of transcription, …
251574_at	AT3G58100	PDCB5	0.0314041	0.00988364	3.24365
251545_at	AT3G58810	MTPA2	0.0176946	0.00363302	5.5512	0006810 // transport // inferred from electronic annotation///0006811 // ion transport // inferred from electronic annotation///0006812 // cation transport // inferred from electronic annotation///0006826 // iron ion transport // inferred from reviewed computational analysis///0006829 // zinc ion transport // inferred from sequence or structural similarity///0010043 // response to zinc ion // inf…
251524_at	AT3G58980///AT3G58990	IPMI1	0.00509979	0.000238336	21.441	0008152 // metabolic process // inferred from electronic annotation///0008152 // metabolic process // inferred from sequence or structural similarity///0009098 // leucine biosynthetic process // inferred from electronic annotation///0019761 // glucosinolate biosynthetic process // inferred from reviewed computational analysis
251519_at	AT3G59400	GUN4	0.0128016	0.0019598	3.82319	0006098 // pentose-phosphate shunt // inferred from reviewed computational analysis///0006364 // rRNA processing // inferred from reviewed computational analysis///0009073 // aromatic amino acid family biosynthetic process // inferred from reviewed computational analysis///0009965 // leaf morphogenesis // inferred from reviewed computational analysis///0010019 // chloroplast-nucleus signaling pat…
251461_at	AT3G59780		0.0116875	0.00161852	5.46527	0000023 // maltose metabolic process // inferred from reviewed computational analysis///0006098 // pentose-phosphate shunt // inferred from reviewed computational analysis///0016117 // carotenoid biosynthetic process // inferred from reviewed computational analysis///0019252 // starch biosynthetic process // inferred from reviewed computational analysis///0019288 // isopentenyl diphosphate biosyn…
251425_at	AT3G60210		0.00550484	0.000295968	3.24054	0006457 // protein folding // inferred from electronic annotation
251421_at	AT3G60510		0.0184215	0.00388525	3.19086	0008152 // metabolic process // inferred from electronic annotation///0008152 // metabolic process // inferred from sequence or structural similarity
251356_at	AT3G61060	AtPP2-A13	0.00858824	0.000827723	5.7797	0009611 // response to wounding // inferred from expression pattern///0009744 // response to sucrose stimulus // inferred from reviewed computational analysis///0009750 // response to fructose stimulus // inferred from reviewed computational analysis///0016567 // protein ubiquitination // inferred from electronic annotation
251360_at	AT3G61210		0.00597171	0.000372809	5.37	0008152 // metabolic process // inferred from electronic annotation///0032259 // methylation // inferred from electronic annotation
251261_at	AT3G62110		0.00548947	0.000293049	3.01368	0005975 // carbohydrate metabolic process // inferred from electronic annotation///0005975 // carbohydrate metabolic process // inferred from sequence or structural similarity///0008152 // metabolic process // inferred from electronic annotation
251219_at	AT3G62390	TBL6	0.00259785	1.03642e-05	3.33444
251218_at	AT3G62410	CP12-2	0.00305702	4.38537e-05	4.08274	0009416 // response to light stimulus // inferred from expression pattern///0009637 // response to blue light // inferred from reviewed computational analysis///0009644 // response to high light intensity // inferred from reviewed computational analysis///0009744 // response to sucrose stimulus // inferred from expression pattern///0009744 // response to sucrose stimulus // inferred from reviewed…
251221_at	AT3G62550		0.0295468	0.00891566	3.22443	0002238 // response to molecule of fungal origin // inferred from reviewed computational analysis///0006950 // response to stress // inferred from electronic annotation
251231_at	AT3G62760	ATGSTF13	0.016543	0.00318506	3.80002	0009407 // toxin catabolic process // inferred from reviewed computational analysis///0009407 // toxin catabolic process // traceable author statement///0009636 // response to toxic substance // inferred from electronic annotation
251157_at	AT3G63140	CSP41A	0.00619763	0.000403743	6.1301	0006098 // pentose-phosphate shunt // inferred from reviewed computational analysis///0006364 // rRNA processing // inferred from genetic interaction///0006364 // rRNA processing // inferred from reviewed computational analysis///0007623 // circadian rhythm // inferred from sequence or structural similarity///0009637 // response to blue light // inferred from reviewed computational analysis///000…
251172_at	AT3G63190	RRF	0.00728572	0.000583662	3.94696	0006098 // pentose-phosphate shunt // inferred from reviewed computational analysis///0006412 // translation // inferred from electronic annotation///0006412 // translation // inferred from sequence or structural similarity///0009073 // aromatic amino acid family biosynthetic process // inferred from reviewed computational analysis///0009658 // chloroplast organization // inferred from mutant phe…
251120_at	AT3G63490		0.00529744	0.000262758	3.14376	0006098 // pentose-phosphate shunt // inferred from reviewed computational analysis///0006354 // DNA-dependent transcription, elongation // inferred from reviewed computational analysis///0006412 // translation // inferred from electronic annotation///0006412 // translation // inferred from sequence or structural similarity///0009073 // aromatic amino acid family biosynthetic process // inferred …
255626_at	AT4G00780		0.0042426	0.000155902	3.08588
255623_at	AT4G01310		0.00221523	2.8842e-06	4.93253	0006412 // translation // inferred from electronic annotation///0006412 // translation // inferred from sequence or structural similarity///0019288 // isopentenyl diphosphate biosynthetic process, mevalonate-independent pathway // inferred from reviewed computational analysis///0019344 // cysteine biosynthetic process // inferred from reviewed computational analysis
255597_at	AT4G01730		0.00555014	0.000301501	3.9723	0000226 // microtubule cytoskeleton organization // inferred from reviewed computational analysis///0000911 // cytokinesis by cell plate formation // inferred from reviewed computational analysis///0006346 // methylation-dependent chromatin silencing // inferred from reviewed computational analysis///0031048 // chromatin silencing by small RNA // inferred from reviewed computational analysis///00…
255516_at	AT4G02270	RHS13	0.0307192	0.00954179	3.56204	0006826 // iron ion transport // inferred from reviewed computational analysis///0010054 // trichoblast differentiation // inferred from reviewed computational analysis///0010106 // cellular response to iron ion starvation // inferred from reviewed computational analysis///0010167 // response to nitrate // inferred from reviewed computational analysis///0015706 // nitrate transport // inferred fr…
255517_at	AT4G02290	AtGH9B13	0.00404363	0.000133004	8.83669	0000272 // polysaccharide catabolic process // inferred from electronic annotation///0005975 // carbohydrate metabolic process // inferred from electronic annotation///0008152 // metabolic process // inferred from electronic annotation///0010089 // xylem development // inferred from reviewed computational analysis///0030245 // cellulose catabolic process // inferred from electronic annotation///0…
255447_at	AT4G02790		0.0138194	0.00228042	3.14961	0000023 // maltose metabolic process // inferred from reviewed computational analysis///0006655 // phosphatidylglycerol biosynthetic process // inferred from reviewed computational analysis///0009902 // chloroplast relocation // inferred from reviewed computational analysis///0010027 // thylakoid membrane organization // inferred from reviewed computational analysis///0019252 // starch biosynthet…
255450_at	AT4G02850		0.0255466	0.00689624	5.89203	0007623 // circadian rhythm // inferred from reviewed computational analysis///0009058 // biosynthetic process // inferred from electronic annotation///0009058 // biosynthetic process // inferred from sequence or structural similarity///0009736 // cytokinin mediated signaling pathway // inferred from reviewed computational analysis
255436_at	AT4G03150		0.012995	0.00201946	3.08914
255310_at	AT4G04955	ATALN	0.00375872	0.000107381	7.62119	0000256 // allantoin catabolic process // inferred from electronic annotation///0006995 // cellular response to nitrogen starvation // inferred from expression pattern///0010136 // ureide catabolic process // inferred from mutant phenotype
255265_at	AT4G05190	ATK5	0.00685963	0.000511101	11.6752	0000087 // M phase of mitotic cell cycle // inferred from reviewed computational analysis///0000226 // microtubule cytoskeleton organization // inferred from mutant phenotype///0000226 // microtubule cytoskeleton organization // inferred from reviewed computational analysis///0000278 // mitotic cell cycle // inferred from reviewed computational analysis///0000280 // nuclear division // inferred f…
255236_at	AT4G05520	ATEHD2	0.00927586	0.000983508	4.90763	0006184 // GTP catabolic process // inferred from electronic annotation///0006897 // endocytosis // inferred from mutant phenotype///0006897 // endocytosis // inferred from reviewed computational analysis
254964_at	AT4G11080		0.0167681	0.003278	3.10141	0006355 // regulation of transcription, DNA-dependent // inferred from sequence or structural similarity
254914_at	AT4G11290		0.0242283	0.00633646	3.92483	0006979 // response to oxidative stress // inferred from electronic annotation///0042744 // hydrogen peroxide catabolic process // inferred from electronic annotation///0055114 // oxidation-reduction process // inferred from electronic annotation
254915_s_at	AT4G11310///AT4G11320		0.0101902	0.0012069	3.01335	0006508 // proteolysis // inferred from electronic annotation///0006508 // proteolysis // inferred from sequence or structural similarity
254862_at	AT4G12030	BAT5	0.00574332	0.000333914	10.7511	0006810 // transport // inferred from electronic annotation///0006814 // sodium ion transport // inferred from electronic annotation///0006814 // sodium ion transport // inferred from sequence or structural similarity///0009611 // response to wounding // inferred from direct assay///0009611 // response to wounding // inferred from expression pattern///0009753 // response to jasmonic acid stimulus…
254783_at	AT4G12830		0.00979386	0.00110296	7.54324	0008152 // metabolic process // inferred from electronic annotation///0016556 // mRNA modification // inferred from reviewed computational analysis
254794_at	AT4G12970	STOMAGEN	0.00289656	2.94551e-05	7.01867	0007267 // cell-cell signaling // non-traceable author statement///0007275 // multicellular organismal development // inferred from electronic annotation///0010052 // guard cell differentiation // inferred from sequence or structural similarity///0010374 // stomatal complex development // inferred from sequence or structural similarity///0010375 // stomatal complex patterning // inferred from dir…
254746_at	AT4G12980		0.0053341	0.000266709	8.32338	0007275 // multicellular organismal development // inferred from sequence or structural similarity
254727_at	AT4G13670	PTAC5	0.00299442	3.41644e-05	3.23863	0008152 // metabolic process // inferred from electronic annotation
254687_at	AT4G13770///AT5G65110	CYP83A1	0.00445172	0.000175968	17.3885	0001676 // long-chain fatty acid metabolic process // inferred from direct assay///0006098 // pentose-phosphate shunt // inferred from reviewed computational analysis///0006635 // fatty acid beta-oxidation // inferred from sequence similarity///0006635 // fatty acid beta-oxidation // inferred from direct assay///0006635 // fatty acid beta-oxidation // RCA///0009062 // fatty acid catabolic process…
245265_at	AT4G14400	ACD6	0.0238449	0.00614711	7.58458	0008219 // cell death // inferred from mutant phenotype///0009615 // response to virus // inferred from expression pattern///0009751 // response to salicylic acid stimulus // inferred from mutant phenotype///0009816 // defense response to bacterium, incompatible interaction // inferred from mutant phenotype
245592_at	AT4G14540	NF-YB3	0.00282745	1.79826e-05	5.20572	0006351 // transcription, DNA-dependent // inferred from electronic annotation///0006355 // regulation of transcription, DNA-dependent // inferred from electronic annotation
245347_at	AT4G14890		0.00887281	0.000902166	4.35785	0006098 // pentose-phosphate shunt // inferred from reviewed computational analysis///0006364 // rRNA processing // inferred from reviewed computational analysis///0015995 // chlorophyll biosynthetic process // inferred from reviewed computational analysis///0019288 // isopentenyl diphosphate biosynthetic process, mevalonate-independent pathway // inferred from reviewed computational analysis///0…
245392_at	AT4G15680		0.0217461	0.00524304	4.36261	0045454 // cell redox homeostasis // inferred from electronic annotation
245505_at	AT4G15690		0.0291878	0.00870797	4.78617	0045454 // cell redox homeostasis // inferred from electronic annotation///0048653 // anther development // inferred from reviewed computational analysis
245343_at	AT4G15830		0.0109999	0.00143115	8.36453	0000226 // microtubule cytoskeleton organization // inferred from reviewed computational analysis///0000911 // cytokinesis by cell plate formation // inferred from reviewed computational analysis///0010583 // response to cyclopentenone // inferred from reviewed computational analysis///0051225 // spindle assembly // inferred from reviewed computational analysis///0051322 // anaphase // inferred f…
245399_at	AT4G17340	TIP2;2	0.00418653	0.000149075	10.0517	0006810 // transport // inferred from electronic annotation///0006810 // transport // inferred from sequence or structural similarity///0006833 // water transport // inferred from electronic annotation///0010167 // response to nitrate // inferred from reviewed computational analysis///0015706 // nitrate transport // inferred from reviewed computational analysis///0055085 // transmembrane transpor…
245362_at	AT4G17460	HAT1	0.0183924	0.00386138	3.44388	0003006 // developmental process involved in reproduction // inferred from genetic interaction///0006351 // transcription, DNA-dependent // inferred from electronic annotation///0006355 // regulation of transcription, DNA-dependent // inferred from electronic annotation///0006355 // regulation of transcription, DNA-dependent // inferred from sequence or structural similarity///0010582 // floral m…
254665_at	AT4G18340		0.00507187	0.000234598	3.68226	0005975 // carbohydrate metabolic process // inferred from electronic annotation
254609_at	AT4G18970		0.00323899	6.32566e-05	4.89182	0006629 // lipid metabolic process // inferred from electronic annotation///0016042 // lipid catabolic process // inferred from electronic annotation
254564_at	AT4G19170	NCED4	0.0058257	0.000351742	3.73519	0009718 // anthocyanin-containing compound biosynthetic process // inferred from reviewed computational analysis///0055114 // oxidation-reduction process // inferred from electronic annotation
254553_at	AT4G19530		0.01233	0.0018179	3.28455	0006952 // defense response // inferred from electronic annotation///0006952 // defense response // inferred from sequence or structural similarity///0007165 // signal transduction // inferred from electronic annotation///0009637 // response to blue light // inferred from reviewed computational analysis///0009870 // defense response signaling pathway, resistance gene-dependent // inferred from di…
254505_at	AT4G19985		0.0118133	0.00166828	3.31603	0008152 // metabolic process // inferred from sequence or structural similarity///0009965 // leaf morphogenesis // inferred from reviewed computational analysis///0030154 // cell differentiation // inferred from reviewed computational analysis
254496_at	AT4G20070	ATAAH	0.00285464	2.20819e-05	5.84971	0006144 // purine nucleobase metabolic process // inferred from electronic annotation///0006508 // proteolysis // inferred from electronic annotation///0006508 // proteolysis // inferred from sequence or structural similarity///0008152 // metabolic process // inferred from electronic annotation///0010136 // ureide catabolic process // inferred from mutant phenotype///0015996 // chlorophyll catabo…
254502_at	AT4G20130	PTAC14	0.00487345	0.000214502	3.22167	0006364 // rRNA processing // inferred from reviewed computational analysis///0006399 // tRNA metabolic process // inferred from reviewed computational analysis///0006655 // phosphatidylglycerol biosynthetic process // inferred from reviewed computational analysis///0009658 // chloroplast organization // inferred from reviewed computational analysis///0010103 // stomatal complex morphogenesis // …
254506_at	AT4G20140	GSO1	0.00778771	0.000674909	3.25188	0006468 // protein phosphorylation // inferred from electronic annotation///0006468 // protein phosphorylation // inferred from sequence or structural similarity///0007169 // transmembrane receptor protein tyrosine kinase signaling pathway // inferred from sequence or structural similarity///0007275 // multicellular organismal development // inferred from electronic annotation///0008544 // epider…
254474_at	AT4G20390		0.00773968	0.000654846	6.31616	0000041 // transition metal ion transport // inferred from reviewed computational analysis
254410_at	AT4G21410	CRK29	0.00823366	0.000759045	3.32176	0006468 // protein phosphorylation // inferred from electronic annotation///0009737 // response to abscisic acid stimulus // inferred from expression pattern///0016310 // phosphorylation // inferred from electronic annotation
254384_at	AT4G21870		0.0285999	0.00841682	3.81803	0006950 // response to stress // inferred from electronic annotation///0009408 // response to heat // inferred from sequence or structural similarity///0009408 // response to heat // inferred from reviewed computational analysis///0009644 // response to high light intensity // inferred from reviewed computational analysis///0042542 // response to hydrogen peroxide // inferred from reviewed comput…
254340_at	AT4G22120		0.00719097	0.000570556	3.42927
254327_at	AT4G22490		0.00263763	1.37353e-05	3.58292	0006869 // lipid transport // inferred from electronic annotation///0006869 // lipid transport // inferred from sequence or structural similarity///0010103 // stomatal complex morphogenesis // inferred from reviewed computational analysis
254303_at	AT4G22830		0.00584226	0.000354568	3.65194	0010207 // photosystem II assembly // inferred from reviewed computational analysis
254233_at	AT4G23800		0.00326793	6.61078e-05	5.39746	0000226 // microtubule cytoskeleton organization // inferred from reviewed computational analysis///0000911 // cytokinesis by cell plate formation // inferred from reviewed computational analysis///0006084 // acetyl-CoA metabolic process // inferred from reviewed computational analysis///0006355 // regulation of transcription, DNA-dependent // inferred from sequence or structural similarity///000…
254125_at	AT4G24670	TAR2	0.0162345	0.00308817	4.4905	0009684 // indoleacetic acid biosynthetic process // inferred from genetic interaction///0009723 // response to ethylene stimulus // inferred from genetic interaction///0009793 // embryo development ending in seed dormancy // inferred from genetic interaction///0009851 // auxin biosynthetic process // inferred from electronic annotation///0009908 // flower development // inferred from genetic int…
254145_at	AT4G24700		0.0259797	0.00709642	3.18631
254119_at	AT4G24780		0.00285464	2.12696e-05	7.77437	0006949 // syncytium formation // inferred from reviewed computational analysis///0045490 // pectin catabolic process // inferred from electronic annotation
253998_at	AT4G26010		0.0113651	0.00153107	5.71107	0006826 // iron ion transport // inferred from reviewed computational analysis///0006979 // response to oxidative stress // inferred from electronic annotation///0010054 // trichoblast differentiation // inferred from reviewed computational analysis///0010106 // cellular response to iron ion starvation // inferred from reviewed computational analysis///0010167 // response to nitrate // inferred f…
254011_at	AT4G26370		0.0193647	0.00423826	3.79787	0006353 // DNA-dependent transcription, termination // inferred from electronic annotation///0006355 // regulation of transcription, DNA-dependent // inferred from electronic annotation///0006355 // regulation of transcription, DNA-dependent // inferred from sequence or structural similarity///0009073 // aromatic amino acid family biosynthetic process // inferred from reviewed computational analy…
253973_at	AT4G26555		0.00289656	2.96985e-05	3.5587	0000412 // histone peptidyl-prolyl isomerization // not recorded///0006457 // protein folding // inferred from electronic annotation///0018208 // peptidyl-proline modification // not recorded
253943_at	AT4G27030	FADA	0.0109146	0.00141482	6.30253	0006636 // unsaturated fatty acid biosynthetic process // inferred from mutant phenotype///0046471 // phosphatidylglycerol metabolic process // inferred from mutant phenotype///0080167 // response to karrikin // inferred from expression pattern
253823_at	AT4G28030		0.00861217	0.000839861	3.05266	0006569 // tryptophan catabolic process // inferred from reviewed computational analysis///0006833 // water transport // inferred from reviewed computational analysis///0008152 // metabolic process // inferred from sequence or structural similarity///0009651 // response to salt stress // inferred from reviewed computational analysis///0009684 // indoleacetic acid biosynthetic process // inferred …
253849_at	AT4G28080		0.00396781	0.000123526	3.59017	0006655 // phosphatidylglycerol biosynthetic process // inferred from reviewed computational analysis///0009737 // response to abscisic acid stimulus // inferred from direct assay///0010103 // stomatal complex morphogenesis // inferred from reviewed computational analysis///0016556 // mRNA modification // inferred from reviewed computational analysis///0019288 // isopentenyl diphosphate biosynthe…
253804_at	AT4G28230		0.0101173	0.00118666	3.0333
253812_at	AT4G28240		0.00992976	0.00112974	3.61527
253815_at	AT4G28250	ATEXPB3	0.00942633	0.00102463	9.70143	0006949 // syncytium formation // inferred from expression pattern///0009664 // plant-type cell wall organization // inferred from sequence or structural similarity///0009826 // unidimensional cell growth // inferred from sequence or structural similarity///0009826 // unidimensional cell growth // non-traceable author statement///0009828 // plant-type cell wall loosening // inferred from sequence…
253806_at	AT4G28270	RMA2	0.00306873	4.52271e-05	3.96819	0016567 // protein ubiquitination // inferred from electronic annotation
253817_at	AT4G28310		0.00412632	0.000140651	3.05927
253786_at	AT4G28650		0.0295658	0.0089417	3.51176	0002237 // response to molecule of bacterial origin // inferred from reviewed computational analysis///0006468 // protein phosphorylation // inferred from electronic annotation///0006468 // protein phosphorylation // inferred from sequence or structural similarity///0007165 // signal transduction // inferred from reviewed computational analysis///0007169 // transmembrane receptor protein tyrosine…
253790_at	AT4G28660	PSB28	0.00683658	0.000507715	3.13824	0000038 // very long-chain fatty acid metabolic process // inferred from reviewed computational analysis///0006655 // phosphatidylglycerol biosynthetic process // inferred from reviewed computational analysis///0010207 // photosystem II assembly // inferred from reviewed computational analysis///0015979 // photosynthesis // inferred from electronic annotation///0015979 // photosynthesis // inferr…
253757_at	AT4G28950	ROP9	0.0202401	0.00460427	3.3737	0006184 // GTP catabolic process // inferred from electronic annotation///0007015 // actin filament organization // inferred from reviewed computational analysis///0007165 // signal transduction // inferred from electronic annotation///0007264 // small GTPase mediated signal transduction // inferred from electronic annotation///0009738 // abscisic acid mediated signaling pathway // inferred from …
253758_at	AT4G29060	emb2726	0.010114	0.0011845	3.91129	0006412 // translation // inferred from electronic annotation///0006414 // translational elongation // inferred from electronic annotation///0006414 // translational elongation // inferred from sequence or structural similarity///0009793 // embryo development ending in seed dormancy // non-traceable author statement///0009902 // chloroplast relocation // inferred from reviewed computational analy…
253729_at	AT4G29360		0.00577058	0.000342913	3.25607	0000226 // microtubule cytoskeleton organization // inferred from reviewed computational analysis///0000911 // cytokinesis by cell plate formation // inferred from reviewed computational analysis///0005975 // carbohydrate metabolic process // inferred from electronic annotation///0006306 // DNA methylation // inferred from reviewed computational analysis///0006346 // methylation-dependent chromat…
253696_at	AT4G29740	CKX4	0.0287691	0.00849434	3.28004	0009690 // cytokinin metabolic process // inferred from electronic annotation///0009823 // cytokinin catabolic process // inferred from sequence or structural similarity///0009823 // cytokinin catabolic process // traceable author statement///0055114 // oxidation-reduction process // inferred from electronic annotation
253660_at	AT4G30140	CDEF1	0.0204363	0.00467835	3.90694	0006629 // lipid metabolic process // inferred from electronic annotation///0016042 // lipid catabolic process // inferred from electronic annotation
253579_at	AT4G30610	BRS1	0.00812543	0.000734452	3.99643	0006508 // proteolysis // inferred from direct assay///0006508 // proteolysis // inferred from electronic annotation///0006508 // proteolysis // inferred from sequence or structural similarity///0009742 // brassinosteroid mediated signaling pathway // inferred from genetic interaction
253582_at	AT4G30670		0.0205212	0.00472228	8.08501	0006826 // iron ion transport // inferred from reviewed computational analysis///0010054 // trichoblast differentiation // inferred from reviewed computational analysis///0010106 // cellular response to iron ion starvation // inferred from reviewed computational analysis///0010167 // response to nitrate // inferred from reviewed computational analysis///0015706 // nitrate transport // inferred fr…
253589_at	AT4G30825		0.00737993	0.000596055	3.31215	0007049 // cell cycle // inferred from electronic annotation///0016556 // mRNA modification // inferred from reviewed computational analysis
253562_at	AT4G31130		0.0116875	0.00162222	3.08007
253515_at	AT4G31320		0.00715754	0.000565041	3.74316	0009733 // response to auxin stimulus // inferred from sequence or structural similarity
253480_at	AT4G31840	ENODL15	0.00307218	5.23634e-05	7.23363	0000226 // microtubule cytoskeleton organization // inferred from reviewed computational analysis///0000911 // cytokinesis by cell plate formation // inferred from reviewed computational analysis///0006084 // acetyl-CoA metabolic process // inferred from reviewed computational analysis///0010075 // regulation of meristem growth // inferred from reviewed computational analysis///0051225 // spindle…
253495_at	AT4G31850	PGR3	0.014055	0.00234761	3.93934	0000023 // maltose metabolic process // inferred from reviewed computational analysis///0000272 // polysaccharide catabolic process // inferred from reviewed computational analysis///0005982 // starch metabolic process // inferred from reviewed computational analysis///0006098 // pentose-phosphate shunt // inferred from reviewed computational analysis///0006655 // phosphatidylglycerol biosyntheti…
253421_at	AT4G32340		0.0154649	0.00279699	12.7021	0009965 // leaf morphogenesis // inferred from reviewed computational analysis///0030154 // cell differentiation // inferred from reviewed computational analysis///0045893 // positive regulation of transcription, DNA-dependent // inferred from reviewed computational analysis
253440_at	AT4G32570	TIFY8	0.0157692	0.00292671	5.14702
253403_at	AT4G32830	AtAUR1	0.00442805	0.000174569	3.44338	0000278 // mitotic cell cycle // inferred from reviewed computational analysis///0006342 // chromatin silencing // inferred from reviewed computational analysis///0006468 // protein phosphorylation // inferred from electronic annotation///0007049 // cell cycle // inferred from electronic annotation///0007067 // mitosis // inferred from electronic annotation///0016310 // phosphorylation // inferre…
253340_s_at	AT4G33260///AT4G33270	CDC20.2	0.00601355	0.000381181	8.79619	0007049 // cell cycle // inferred from electronic annotation///0007067 // mitosis // inferred from electronic annotation///0007165 // signal transduction // inferred from sequence or structural similarity///0016567 // protein ubiquitination // inferred from electronic annotation///0051301 // cell division // inferred from electronic annotation
253357_at	AT4G33400		0.00954159	0.00104996	3.11702	0000085 // G2 phase of mitotic cell cycle // inferred from reviewed computational analysis///0006260 // DNA replication // inferred from reviewed computational analysis///0006275 // regulation of DNA replication // inferred from reviewed computational analysis///0006306 // DNA methylation // inferred from reviewed computational analysis///0006342 // chromatin silencing // inferred from reviewed c…
253294_at	AT4G33740		0.0108254	0.00137692	3.35192	0000394 // RNA splicing, via endonucleolytic cleavage and ligation // inferred from reviewed computational analysis///0009086 // methionine biosynthetic process // inferred from reviewed computational analysis
253283_at	AT4G34090		0.00343175	7.86538e-05	4.45575	0006098 // pentose-phosphate shunt // inferred from reviewed computational analysis///0009965 // leaf morphogenesis // inferred from reviewed computational analysis///0019288 // isopentenyl diphosphate biosynthetic process, mevalonate-independent pathway // inferred from reviewed computational analysis///0030154 // cell differentiation // inferred from reviewed computational analysis
253278_at	AT4G34220		0.0249116	0.0066464	5.70021	0006468 // protein phosphorylation // inferred from electronic annotation///0006468 // protein phosphorylation // inferred from sequence or structural similarity///0007169 // transmembrane receptor protein tyrosine kinase signaling pathway // inferred from sequence or structural similarity///0016310 // phosphorylation // inferred from electronic annotation
253233_at	AT4G34290		0.00260745	1.31346e-05	4.33872
253243_at	AT4G34560		0.00824488	0.000762198	3.08844
253208_at	AT4G34830	MRL1	0.00680026	0.000502833	3.03363	0009902 // chloroplast relocation // inferred from reviewed computational analysis///0010027 // thylakoid membrane organization // inferred from reviewed computational analysis///0010103 // stomatal complex morphogenesis // inferred from reviewed computational analysis///0016556 // mRNA modification // inferred from reviewed computational analysis///0019288 // isopentenyl diphosphate biosynthetic…
253191_at	AT4G35350	XCP1	0.00550484	0.000296128	3.2888	0006508 // proteolysis // inferred from electronic annotation///0006508 // proteolysis // inferred from sequence or structural similarity///0010413 // glucuronoxylan metabolic process // inferred from reviewed computational analysis///0010623 // developmental programmed cell death // inferred from mutant phenotype///0045492 // xylan biosynthetic process // inferred from reviewed computational ana…
253161_at	AT4G35770	SEN1	0.00305702	4.3638e-05	44.7912	0006979 // response to oxidative stress // inferred from expression pattern///0007568 // aging // inferred from expression pattern///0007568 // aging // inferred from sequence or structural similarity///0009611 // response to wounding // inferred from expression pattern///0009744 // response to sucrose stimulus // inferred from reviewed computational analysis///0009750 // response to fructose sti…
246195_at	AT4G36410	UBC17	0.0050028	0.00022811	11.3383	0006511 // ubiquitin-dependent protein catabolic process // traceable author statement///0009739 // response to gibberellin stimulus // inferred from expression pattern///0016567 // protein ubiquitination // inferred from electronic annotation
246275_at	AT4G36540	BEE2	0.00285464	2.71818e-05	6.2533	0006351 // transcription, DNA-dependent // inferred from electronic annotation///0006355 // regulation of transcription, DNA-dependent // traceable author statement///0009740 // gibberellic acid mediated signaling pathway // inferred from reviewed computational analysis///0010162 // seed dormancy process // inferred from reviewed computational analysis
246202_at	AT4G37040	MAP1D	0.0102829	0.00123113	3.18072	0006508 // proteolysis // inferred from electronic annotation///0006508 // proteolysis // inferred from sequence or structural similarity///0009737 // response to abscisic acid stimulus // inferred from direct assay///0009987 // cellular process // inferred from electronic annotation///0019408 // dolichol biosynthetic process // inferred from reviewed computational analysis///0031365 // N-termina…
246269_at	AT4G37110		0.00299442	3.52929e-05	3.00604
253095_at	AT4G37510		0.021843	0.00528324	3.32211	0006396 // RNA processing // inferred from electronic annotation///0006396 // RNA processing // inferred from sequence or structural similarity///0009409 // response to cold // inferred from expression pattern///0009637 // response to blue light // inferred from expression pattern///0009853 // photorespiration // inferred from electronic annotation///0010027 // thylakoid membrane organization // …
253061_at	AT4G37610	BT5	0.0214591	0.00512311	4.67828	0006355 // regulation of transcription, DNA-dependent // inferred from electronic annotation///0006355 // regulation of transcription, DNA-dependent // traceable author statement///0009409 // response to cold // inferred from expression pattern///0009733 // response to auxin stimulus // inferred from expression pattern///0009751 // response to salicylic acid stimulus // inferred from expression p…
253024_at	AT4G38080		0.0262569	0.00721619	6.25558
253028_at	AT4G38160	pde191	0.00453441	0.000183641	4.16414	0009793 // embryo development ending in seed dormancy // inferred from reviewed computational analysis///0010027 // thylakoid membrane organization // inferred from reviewed computational analysis///0010103 // stomatal complex morphogenesis // inferred from reviewed computational analysis///0010228 // vegetative to reproductive phase transition of meristem // inferred from reviewed computational …
252991_at	AT4G38470		0.00296015	3.25162e-05	4.4215	0006468 // protein phosphorylation // inferred from electronic annotation///0007015 // actin filament organization // inferred from reviewed computational analysis///0008152 // metabolic process // inferred from electronic annotation///0009658 // chloroplast organization // inferred from genetic interaction///0016310 // phosphorylation // inferred from electronic annotation
252954_at	AT4G38660		0.013029	0.00202798	4.34706	0009664 // plant-type cell wall organization // inferred from reviewed computational analysis///0010075 // regulation of meristem growth // inferred from reviewed computational analysis///0042545 // cell wall modification // inferred from reviewed computational analysis///0048653 // anther development // inferred from reviewed computational analysis///0051707 // response to other organism // infe…
252916_at	AT4G38950		0.00887281	0.000900655	3.27367	0007017 // microtubule-based process // inferred from sequence or structural similarity///0007018 // microtubule-based movement // inferred from electronic annotation
252877_at	AT4G39630		0.00405549	0.000133654	4.03935	0000911 // cytokinesis by cell plate formation // inferred from reviewed computational analysis///0006275 // regulation of DNA replication // inferred from reviewed computational analysis///0006346 // methylation-dependent chromatin silencing // inferred from reviewed computational analysis///0009909 // regulation of flower development // inferred from reviewed computational analysis///0009957 //…
252882_at	AT4G39675		0.0154439	0.00278795	4.43273
252853_at	AT4G39710	FKBP16-2	0.00289656	2.92539e-05	24.057	0000413 // protein peptidyl-prolyl isomerization // not recorded///0006457 // protein folding // inferred from electronic annotation///0018208 // peptidyl-proline modification // not recorded
252876_at	AT4G39970		0.00776005	0.000668745	6.54078	0008152 // metabolic process // inferred from electronic annotation///0019761 // glucosinolate biosynthetic process // inferred from reviewed computational analysis
251142_at	AT5G01015		0.00579208	0.000346292	5.44224
248622_at	AT5G01980///AT5G49360	BXL1	0.00584226	0.000354866	8.16113	0005975 // carbohydrate metabolic process // inferred from electronic annotation///0008152 // metabolic process // inferred from electronic annotation///0010214 // seed coat development // inferred from mutant phenotype
251031_at	AT5G02120	OHP	0.0059282	0.00036599	3.3338	0007623 // circadian rhythm // inferred from expression pattern///0009637 // response to blue light // inferred from reviewed computational analysis///0009644 // response to high light intensity // inferred from expression pattern///0009644 // response to high light intensity // inferred from reviewed computational analysis///0009744 // response to sucrose stimulus // inferred from reviewed compu…
251036_at	AT5G02160		0.00468377	0.000195884	4.42403	0009965 // leaf morphogenesis // inferred from reviewed computational analysis///0030003 // cellular cation homeostasis // inferred from reviewed computational analysis///0030154 // cell differentiation // inferred from reviewed computational analysis///0043085 // positive regulation of catalytic activity // inferred from reviewed computational analysis///0045893 // positive regulation of transcr…
251017_at	AT5G02760		0.0131705	0.00207043	3.94884	0006470 // protein dephosphorylation // inferred from electronic annotation
250968_at	AT5G02890		0.0306732	0.0095137	4.32223
245690_at	AT5G04230	PAL3	0.00285464	2.15014e-05	4.51065	0006559 // L-phenylalanine catabolic process // inferred from electronic annotation///0006952 // defense response // traceable author statement///0009058 // biosynthetic process // inferred from electronic annotation///0009611 // response to wounding // traceable author statement///0009698 // phenylpropanoid metabolic process // inferred from electronic annotation///0009800 // cinnamic acid biosy…
245709_at	AT5G04320		0.02267	0.00561565	3.37782	0000278 // mitotic cell cycle // inferred from reviewed computational analysis///0006310 // DNA recombination // inferred from reviewed computational analysis///0006396 // RNA processing // inferred from reviewed computational analysis///0007126 // meiosis // inferred from reviewed computational analysis///0009165 // nucleotide biosynthetic process // inferred from reviewed computational analysis…
250891_at	AT5G04530	KCS19	0.0108387	0.00138394	3.29327	0006633 // fatty acid biosynthetic process // inferred from electronic annotation///0008152 // metabolic process // inferred from electronic annotation///0008610 // lipid biosynthetic process // inferred from electronic annotation///0009409 // response to cold // inferred from expression pattern///0009416 // response to light stimulus // inferred from expression pattern
250860_at	AT5G04770	CAT6	0.0113833	0.00153425	5.75901	0003333 // amino acid transmembrane transport // inferred from electronic annotation///0006810 // transport // inferred from sequence or structural similarity///0006865 // amino acid transport // inferred from electronic annotation///0009624 // response to nematode // inferred from expression pattern
250856_at	AT5G04810		0.00314392	6.05921e-05	3.35419
250832_at	AT5G04950	NAS1	0.00468377	0.000195562	5.85565	0009555 // pollen development // inferred from genetic interaction///0009860 // pollen tube growth // inferred from genetic interaction///0010233 // phloem transport // inferred from genetic interaction///0030418 // nicotianamine biosynthetic process // inferred from direct assay///0071281 // cellular response to iron ion // inferred from expression pattern///0071369 // cellular response to ethyl…
250801_at	AT5G04960		0.0126566	0.00191647	3.2789	0010054 // trichoblast differentiation // inferred from reviewed computational analysis///0042545 // cell wall modification // inferred from electronic annotation///0043086 // negative regulation of catalytic activity // inferred from electronic annotation///0045490 // pectin catabolic process // inferred from electronic annotation
250741_at	AT5G05790		0.023981	0.00622584	4.196	0006355 // regulation of transcription, DNA-dependent // traceable author statement
250734_at	AT5G06270		0.0051073	0.000239517	6.13373
250682_x_at	AT5G06630		0.0113961	0.00153891	3.44855	0009664 // plant-type cell wall organization // inferred from electronic annotation
250649_at	AT5G06690	WCRKC1	0.00343175	8.24712e-05	4.80899	0006662 // glycerol ether metabolic process // inferred from electronic annotation///0045454 // cell redox homeostasis // inferred from electronic annotation///0055114 // oxidation-reduction process // inferred from electronic annotation
250661_at	AT5G07030		0.0187338	0.00399445	3.71808	0006508 // proteolysis // inferred from electronic annotation///0006508 // proteolysis // inferred from sequence or structural similarity
250601_at	AT5G07810		0.0143993	0.00244491	3.37376	0006310 // DNA recombination // inferred from reviewed computational analysis///0007126 // meiosis // inferred from reviewed computational analysis///0010332 // response to gamma radiation // inferred from reviewed computational analysis///0032204 // regulation of telomere maintenance // inferred from reviewed computational analysis///0043247 // telomere maintenance in response to DNA damage // i…
250533_at	AT5G08640	FLS	0.00783104	0.000683694	3.39737	0009411 // response to UV // inferred from reviewed computational analysis///0009718 // anthocyanin-containing compound biosynthetic process // inferred from reviewed computational analysis///0009733 // response to auxin stimulus // inferred from expression pattern///0009744 // response to sucrose stimulus // inferred from reviewed computational analysis///0009813 // flavonoid biosynthetic proces…
250531_at	AT5G08650		0.00910331	0.000946842	3.56162	0006098 // pentose-phosphate shunt // inferred from reviewed computational analysis///0006184 // GTP catabolic process // inferred from electronic annotation///0006364 // rRNA processing // inferred from reviewed computational analysis///0006412 // translation // inferred from electronic annotation///0009637 // response to blue light // inferred from reviewed computational analysis///0009902 // c…
245891_at	AT5G09220	AAP2	0.00301551	4.09577e-05	7.38001	0003333 // amino acid transmembrane transport // inferred from genetic interaction///0006612 // protein targeting to membrane // inferred from reviewed computational analysis///0006810 // transport // inferred from electronic annotation///0006833 // water transport // inferred from reviewed computational analysis///0006865 // amino acid transport // inferred from sequence or structural similarity…
245889_at	AT5G09480		0.0157649	0.00292288	3.82723
250541_at	AT5G09520		0.0171977	0.00344926	3.12025
250469_at	AT5G10130		0.00983825	0.00110985	7.57277
250471_at	AT5G10170	MIPS3	0.0116471	0.00160273	5.87226	0000302 // response to reactive oxygen species // inferred from reviewed computational analysis///0006021 // inositol biosynthetic process // inferred from electronic annotation///0006021 // inositol biosynthetic process // inferred from sequence or structural similarity///0006629 // lipid metabolic process // inferred from electronic annotation///0008654 // phospholipid biosynthetic process // i…
250484_at	AT5G10240	ASN3	0.0111819	0.0014791	3.06671	0006529 // asparagine biosynthetic process // inferred from electronic annotation///0006529 // asparagine biosynthetic process // inferred from genetic interaction///0006529 // asparagine biosynthetic process // inferred from sequence or structural similarity///0006541 // glutamine metabolic process // inferred from electronic annotation///0008152 // metabolic process // inferred from electronic …
250437_at	AT5G10430	AGP4	0.00403985	0.000131582	5.10766	0016126 // sterol biosynthetic process // inferred from reviewed computational analysis///0052541 // plant-type cell wall cellulose metabolic process // inferred from reviewed computational analysis///0052546 // cell wall pectin metabolic process // inferred from reviewed computational analysis
250333_at	AT5G11690	TIM17-3	0.0147517	0.00255614	3.07695	0015031 // protein transport // inferred from sequence or structural similarity
250327_at	AT5G12050		0.0152985	0.00272884	3.60146	0007623 // circadian rhythm // inferred from expression pattern
250284_at	AT5G13290	CRN	0.021155	0.00500539	3.04017	0006406 // mRNA export from nucleus // inferred from reviewed computational analysis///0006468 // protein phosphorylation // inferred from electronic annotation///0007155 // cell adhesion // inferred from reviewed computational analysis///0009855 // determination of bilateral symmetry // inferred from reviewed computational analysis///0009886 // post-embryonic morphogenesis // inferred from revie…
250214_at	AT5G13870	EXGT-A4	0.00285464	2.06441e-05	3.83502	0005975 // carbohydrate metabolic process // inferred from electronic annotation///0006073 // cellular glucan metabolic process // inferred from electronic annotation///0008152 // metabolic process // inferred from electronic annotation
250220_at	AT5G14210		0.0165491	0.00318948	3.25522	0006468 // protein phosphorylation // inferred from electronic annotation///0006468 // protein phosphorylation // inferred from sequence or structural similarity///0007169 // transmembrane receptor protein tyrosine kinase signaling pathway // inferred from sequence or structural similarity///0016310 // phosphorylation // inferred from electronic annotation
246596_at	AT5G14740	CA2	0.00567892	0.000317215	4.56586	0000165 // MAPK cascade // inferred from reviewed computational analysis///0006612 // protein targeting to membrane // inferred from reviewed computational analysis///0009409 // response to cold // inferred from reviewed computational analysis///0009595 // detection of biotic stimulus // inferred from reviewed computational analysis///0009697 // salicylic acid biosynthetic process // inferred fro…
246565_at	AT5G15530	BCCP2	0.00436849	0.000167891	4.78444	0006629 // lipid metabolic process // inferred from electronic annotation///0006631 // fatty acid metabolic process // inferred from electronic annotation///0006633 // fatty acid biosynthetic process // inferred from electronic annotation///0006633 // fatty acid biosynthetic process // inferred from sequence or structural similarity
246562_at	AT5G15580	LNG1	0.030892	0.00962454	3.32383	0000271 // polysaccharide biosynthetic process // inferred from reviewed computational analysis///0009825 // multidimensional cell growth // inferred from reviewed computational analysis///0009932 // cell tip growth // inferred from reviewed computational analysis///0010075 // regulation of meristem growth // inferred from reviewed computational analysis///0010817 // regulation of hormone levels …
246487_at	AT5G16030		0.0108037	0.00136445	3.86796
246505_at	AT5G16250		0.00259785	9.47948e-06	5.08476
246509_at	AT5G16715	EMB2247	0.0103735	0.00125581	3.37161	0006364 // rRNA processing // inferred from reviewed computational analysis///0006399 // tRNA metabolic process // inferred from reviewed computational analysis///0006418 // tRNA aminoacylation for protein translation // inferred from electronic annotation///0006418 // tRNA aminoacylation for protein translation // inferred from sequence or structural similarity///0006438 // valyl-tRNA aminoacyla…
250099_at	AT5G17300	RVE1	0.0233855	0.00595831	3.16951	0006355 // regulation of transcription, DNA-dependent // inferred from reviewed computational analysis///0006355 // regulation of transcription, DNA-dependent // traceable author statement///0007623 // circadian rhythm // inferred from expression pattern///0007623 // circadian rhythm // inferred from reviewed computational analysis///0009651 // response to salt stress // inferred from reviewed co…
250032_at	AT5G18170	GDH1	0.015732	0.00290353	3.03298	0006520 // cellular amino acid metabolic process // inferred from electronic annotation///0006807 // nitrogen compound metabolic process // inferred from mutant phenotype///0009646 // response to absence of light // inferred from expression pattern///0009651 // response to salt stress // inferred from expression pattern///0046686 // response to cadmium ion // inferred from expression pattern///00…
249993_at	AT5G18570	EMB269	0.00567968	0.000319773	3.60392	0006184 // GTP catabolic process // inferred from direct assay///0006184 // GTP catabolic process // inferred from electronic annotation///0006364 // rRNA processing // inferred from mutant phenotype///0009416 // response to light stimulus // inferred from expression pattern///0009658 // chloroplast organization // inferred from mutant phenotype///0009790 // embryo development // inferred from mu…
249996_at	AT5G18600		0.00307218	5.38282e-05	5.79145	0019243 // methylglyoxal catabolic process to D-lactate // inferred from reviewed computational analysis///0045454 // cell redox homeostasis // inferred from electronic annotation
246142_at	AT5G19970		0.0130372	0.00203104	8.11644	0006826 // iron ion transport // inferred from reviewed computational analysis///0010106 // cellular response to iron ion starvation // inferred from reviewed computational analysis///0010167 // response to nitrate // inferred from reviewed computational analysis///0015706 // nitrate transport // inferred from reviewed computational analysis
246152_at	AT5G20040	IPT9	0.0058257	0.000352551	3.4428	0006164 // purine nucleotide biosynthetic process // inferred from reviewed computational analysis///0008033 // tRNA processing // inferred from electronic annotation///0008033 // tRNA processing // inferred from sequence or structural similarity///0009691 // cytokinin biosynthetic process // inferred from genetic interaction
246114_at	AT5G20250	DIN10	0.0262612	0.00722917	4.8416	0005975 // carbohydrate metabolic process // inferred from electronic annotation///0006979 // response to oxidative stress // inferred from expression pattern///0008152 // metabolic process // inferred from electronic annotation///0009409 // response to cold // inferred from expression pattern///0009744 // response to sucrose stimulus // inferred from reviewed computational analysis///0009750 // …
246004_at	AT5G20630	GER3	0.00343175	7.55977e-05	12.1722	0009409 // response to cold // inferred from expression pattern///0009409 // response to cold // inferred from reviewed computational analysis///0010103 // stomatal complex morphogenesis // inferred from reviewed computational analysis///0019684 // photosynthesis, light reaction // inferred from reviewed computational analysis///0030003 // cellular cation homeostasis // inferred from reviewed com…
246159_at	AT5G20935		0.0213128	0.00507422	4.07356	0010207 // photosystem II assembly // inferred from reviewed computational analysis///0016556 // mRNA modification // inferred from reviewed computational analysis
246028_at	AT5G21170	AKINBETA1	0.00736259	0.000592273	4.08639	0005975 // carbohydrate metabolic process // inferred from electronic annotation///0006629 // lipid metabolic process // inferred from electronic annotation///0006631 // fatty acid metabolic process // inferred from electronic annotation///0006633 // fatty acid biosynthetic process // inferred from electronic annotation///0009744 // response to sucrose stimulus // inferred from reviewed computati…
249932_at	AT5G22390		0.00515673	0.000251112	17.2416
249894_at	AT5G22580		0.00655794	0.000463008	4.98622
249899_at	AT5G22620		0.00343175	7.69831e-05	4.96162	0008152 // metabolic process // inferred from electronic annotation///0008152 // metabolic process // inferred from sequence or structural similarity
249916_at	AT5G22880	HTB2	0.0117918	0.00165976	3.43102	0006334 // nucleosome assembly // inferred from electronic annotation///0008283 // cell proliferation // inferred from reviewed computational analysis
249862_at	AT5G22920		0.00869459	0.000860746	10.0622
249866_at	AT5G23010	MAM1	0.00326793	6.67609e-05	15.0669	0009414 // response to water deprivation // inferred from expression pattern///0009625 // response to insect // inferred from expression pattern///0009684 // indoleacetic acid biosynthetic process // inferred from reviewed computational analysis///0019344 // cysteine biosynthetic process // inferred from reviewed computational analysis///0019752 // carboxylic acid metabolic process // inferred fr…
249867_at	AT5G23020	IMS2	0.0284639	0.00832467	7.85175	0009098 // leucine biosynthetic process // traceable author statement///0009684 // indoleacetic acid biosynthetic process // inferred from reviewed computational analysis///0019344 // cysteine biosynthetic process // inferred from reviewed computational analysis///0019752 // carboxylic acid metabolic process // inferred from electronic annotation///0019761 // glucosinolate biosynthetic process //…
249836_at	AT5G23420	HMGB6	0.0166308	0.00321859	4.45145	0006261 // DNA-dependent DNA replication // inferred from reviewed computational analysis///0006355 // regulation of transcription, DNA-dependent // inferred from sequence or structural similarity
249742_at	AT5G24490		0.00307218	5.24493e-05	3.51938	0006412 // translation // inferred from sequence or structural similarity///0044238 // primary metabolic process // inferred from electronic annotation
249755_at	AT5G24580		0.0100462	0.00116955	3.78377	0006825 // copper ion transport // inferred from sequence or structural similarity///0030001 // metal ion transport // inferred from electronic annotation
246920_at	AT5G25090	ENODL13	0.00545139	0.000286823	4.81951	0000226 // microtubule cytoskeleton organization // inferred from reviewed computational analysis///0000911 // cytokinesis by cell plate formation // inferred from reviewed computational analysis
246906_at	AT5G25475		0.0082054	0.000752425	3.02954	0006351 // transcription, DNA-dependent // inferred from electronic annotation///0006355 // regulation of transcription, DNA-dependent // inferred from electronic annotation///0007267 // cell-cell signaling // inferred from reviewed computational analysis///0009616 // virus induced gene silencing // inferred from reviewed computational analysis///0009855 // determination of bilateral symmetry // …
246911_at	AT5G25810	tny	0.00313391	5.9382e-05	6.01	0006351 // transcription, DNA-dependent // inferred from electronic annotation///0006355 // regulation of transcription, DNA-dependent // inferred from electronic annotation///0009825 // multidimensional cell growth // inferred from mutant phenotype
246847_at	AT5G26820	ATIREG3	0.00344654	8.87874e-05	3.22388	0006810 // transport // inferred from electronic annotation///0006811 // ion transport // inferred from electronic annotation///0006879 // cellular iron ion homeostasis // inferred from mutant phenotype///0034755 // iron ion transmembrane transport // inferred from electronic annotation
246849_at	AT5G26850		0.0130486	0.00203658	5.28427
246792_at	AT5G27290		0.00438941	0.000172012	3.60548	0030003 // cellular cation homeostasis // inferred from reviewed computational analysis///0070838 // divalent metal ion transport // inferred from reviewed computational analysis
246736_at	AT5G27560		0.0100299	0.00116486	5.72771	0000023 // maltose metabolic process // inferred from reviewed computational analysis///0010207 // photosystem II assembly // inferred from reviewed computational analysis///0019252 // starch biosynthetic process // inferred from reviewed computational analysis///0043085 // positive regulation of catalytic activity // inferred from reviewed computational analysis
246108_at	AT5G28630		0.0172142	0.00345439	6.83042
245925_at	AT5G28770	BZO2H3	0.00872164	0.000866151	5.06766	0006351 // transcription, DNA-dependent // inferred from electronic annotation///0006355 // regulation of transcription, DNA-dependent // inferred from electronic annotation///0006355 // regulation of transcription, DNA-dependent // inferred from sequence or structural similarity///0009410 // response to xenobiotic stimulus // inferred from reviewed computational analysis///0030968 // endoplasmic…
246651_at	AT5G35170		0.00297154	3.28588e-05	3.29232	0006139 // nucleobase-containing compound metabolic process // inferred from electronic annotation///0006354 // DNA-dependent transcription, elongation // inferred from reviewed computational analysis///0015979 // photosynthesis // inferred from reviewed computational analysis///0016310 // phosphorylation // inferred from electronic annotation///0046939 // nucleotide phosphorylation // inferred f…
246652_at	AT5G35190		0.0238859	0.00617054	3.80153	0009664 // plant-type cell wall organization // inferred from electronic annotation///0010054 // trichoblast differentiation // inferred from reviewed computational analysis
249727_at	AT5G35490	MRU1	0.011275	0.00150951	4.83437
249718_at	AT5G35740		0.0107706	0.00135481	6.46497
249659_s_at	AT5G36710///AT5G36800		0.0125356	0.00187508	8.02289
249576_at	AT5G37690		0.00776005	0.000666828	6.04	0006629 // lipid metabolic process // inferred from electronic annotation///0016042 // lipid catabolic process // inferred from electronic annotation
249555_at	AT5G38300		0.00567968	0.000324176	3.87938
249524_at	AT5G38520		0.00388101	0.00011631	4.22074	0006364 // rRNA processing // inferred from reviewed computational analysis///0009657 // plastid organization // inferred from reviewed computational analysis///0010207 // photosystem II assembly // inferred from reviewed computational analysis///0010264 // myo-inositol hexakisphosphate biosynthetic process // inferred from reviewed computational analysis///0019761 // glucosinolate biosynthetic p…
249518_at	AT5G38610		0.0172788	0.00347885	3.2722	0043086 // negative regulation of catalytic activity // inferred from electronic annotation
249482_at	AT5G38980		0.00535506	0.000275963	3.29089	0009627 // systemic acquired resistance // inferred from reviewed computational analysis///0031347 // regulation of defense response // inferred from reviewed computational analysis
249472_at	AT5G39210	CRR7	0.00296015	3.24131e-05	12.1425	0000023 // maltose metabolic process // inferred from reviewed computational analysis///0010207 // photosystem II assembly // inferred from reviewed computational analysis///0010275 // NAD(P)H dehydrogenase complex assembly // inferred from genetic interaction///0010275 // NAD(P)H dehydrogenase complex assembly // inferred from mutant phenotype///0016556 // mRNA modification // inferred from revi…
249378_at	AT5G40450		0.0217649	0.00525036	3.65226	0006612 // protein targeting to membrane // inferred from reviewed computational analysis///0006950 // response to stress // inferred from electronic annotation///0009963 // positive regulation of flavonoid biosynthetic process // inferred from reviewed computational analysis///0010363 // regulation of plant-type hypersensitive response // inferred from reviewed computational analysis
249366_at	AT5G40610		0.0031263	5.83576e-05	4.69319	0005975 // carbohydrate metabolic process // inferred from electronic annotation///0006072 // glycerol-3-phosphate metabolic process // inferred from sequence or structural similarity///0006629 // lipid metabolic process // inferred from electronic annotation///0006650 // glycerophospholipid metabolic process // inferred from electronic annotation///0008654 // phospholipid biosynthetic process //…
249288_at	AT5G41050		0.00514471	0.000247551	3.68102
249230_at	AT5G42070		0.0145022	0.00247729	3.05879	0009965 // leaf morphogenesis // inferred from reviewed computational analysis///0030154 // cell differentiation // inferred from reviewed computational analysis///0045893 // positive regulation of transcription, DNA-dependent // inferred from reviewed computational analysis
249227_at	AT5G42180		0.011275	0.00150904	3.8885	0006979 // response to oxidative stress // inferred from electronic annotation///0010413 // glucuronoxylan metabolic process // inferred from reviewed computational analysis///0042744 // hydrogen peroxide catabolic process // inferred from electronic annotation///0045492 // xylan biosynthetic process // inferred from reviewed computational analysis///0055114 // oxidation-reduction process // infe…
249195_s_at	AT5G42500///AT5G42510		0.00935563	0.00100745	5.63404	0006952 // defense response // inferred from sequence or structural similarity
249061_at	AT5G44550		0.00916762	0.000959402	5.72482
249060_at	AT5G44560	VPS2.2	0.00658802	0.000470633	4.81242	0000226 // microtubule cytoskeleton organization // inferred from reviewed computational analysis///0000911 // cytokinesis by cell plate formation // inferred from reviewed computational analysis///0006260 // DNA replication // inferred from reviewed computational analysis///0006306 // DNA methylation // inferred from reviewed computational analysis///0006810 // transport // inferred from electro…
249008_at	AT5G44680		0.0289258	0.00857035	3.17127	0006281 // DNA repair // inferred from electronic annotation///0006281 // DNA repair // inferred from sequence or structural similarity///0006284 // base-excision repair // inferred from electronic annotation///0009637 // response to blue light // inferred from reviewed computational analysis///0010155 // regulation of proton transport // inferred from reviewed computational analysis///0046777 //…
248975_at	AT5G45040		0.0124954	0.00185787	3.9582	0015979 // photosynthesis // inferred from electronic annotation///0055114 // oxidation-reduction process // inferred from electronic annotation
248912_at	AT5G45670		0.016289	0.00310377	3.45671	0006629 // lipid metabolic process // inferred from electronic annotation///0016042 // lipid catabolic process // inferred from electronic annotation
248962_at	AT5G45680	FKBP13	0.00307218	4.91986e-05	4.43934	0000413 // protein peptidyl-prolyl isomerization // inferred from direct assay///0000413 // protein peptidyl-prolyl isomerization // inferred from electronic annotation///0006457 // protein folding // inferred from electronic annotation///0006636 // unsaturated fatty acid biosynthetic process // inferred from reviewed computational analysis///0010103 // stomatal complex morphogenesis // inferred …
248963_at	AT5G45700		0.0111361	0.00146445	6.209	0001708 // cell fate specification // inferred from reviewed computational analysis///0016311 // dephosphorylation // inferred from electronic annotation
248920_at	AT5G45930	CHLI2	0.00285464	2.43644e-05	3.81794	0006200 // ATP catabolic process // inferred from direct assay///0006779 // porphyrin-containing compound biosynthetic process // inferred from electronic annotation///0010103 // stomatal complex morphogenesis // inferred from reviewed computational analysis///0015979 // photosynthesis // inferred from electronic annotation///0015995 // chlorophyll biosynthetic process // inferred from electronic…
248807_at	AT5G47500		0.00246543	8.71121e-06	16.1759	0016572 // histone phosphorylation // inferred from reviewed computational analysis///0042545 // cell wall modification // inferred from electronic annotation///0045490 // pectin catabolic process // inferred from electronic annotation
248759_at	AT5G47610		0.0155812	0.00284298	3.41787	0016567 // protein ubiquitination // inferred from electronic annotation
248772_at	AT5G47800		0.0310568	0.0096991	3.10435	0009416 // response to light stimulus // inferred from electronic annotation///0009416 // response to light stimulus // inferred from sequence or structural similarity///0016567 // protein ubiquitination // inferred from electronic annotation
248691_at	AT5G48310		0.0231832	0.00585523	4.32612	0006275 // regulation of DNA replication // inferred from reviewed computational analysis///0006342 // chromatin silencing // inferred from reviewed computational analysis///0010389 // regulation of G2/M transition of mitotic cell cycle // inferred from reviewed computational analysis///0051567 // histone H3-K9 methylation // inferred from reviewed computational analysis
248684_at	AT5G48485	DIR1	0.00299442	3.6565e-05	3.07923	0006810 // transport // inferred from electronic annotation///0006869 // lipid transport // inferred from sequence or structural similarity///0006952 // defense response // inferred from electronic annotation///0009862 // systemic acquired resistance, salicylic acid mediated signaling pathway // inferred from mutant phenotype
248683_at	AT5G48490		0.00638087	0.000434151	6.10561	0006869 // lipid transport // inferred from sequence or structural similarity
248566_s_at	AT5G49730///AT5G49740	ATFRO7	0.00289656	3.01888e-05	7.6672	0006811 // ion transport // inferred from electronic annotation///0009416 // response to light stimulus // inferred from expression pattern///0009767 // photosynthetic electron transport chain // inferred from mutant phenotype///0055114 // oxidation-reduction process // inferred from electronic annotation
248582_at	AT5G49910	CPHSC70-2EAT SHOCK PROTEIN 70-2	0.00480833	0.000210361	3.19345	0006457 // protein folding // inferred from electronic annotation///0006457 // protein folding // inferred from reviewed computational analysis///0006457 // protein folding // traceable author statement///0006810 // transport // inferred from electronic annotation///0006950 // response to stress // inferred from electronic annotation///0009408 // response to heat // inferred from expression patte…
248432_at	AT5G51390		0.0127724	0.00195182	3.00402
248377_at	AT5G51720		0.0141488	0.00236915	4.87508	0006098 // pentose-phosphate shunt // inferred from reviewed computational analysis///0010150 // leaf senescence // inferred from mutant phenotype///0016556 // mRNA modification // inferred from reviewed computational analysis///0055072 // iron ion homeostasis // inferred from mutant phenotype///0072593 // reactive oxygen species metabolic process // inferred from mutant phenotype
248329_at	AT5G52780		0.00768652	0.00064437	4.8168	0006098 // pentose-phosphate shunt // inferred from reviewed computational analysis///0010155 // regulation of proton transport // inferred from reviewed computational analysis///0010207 // photosystem II assembly // inferred from reviewed computational analysis///0046777 // protein autophosphorylation // inferred from reviewed computational analysis
248287_at	AT5G52970		0.00889027	0.000906961	3.16195	0006098 // pentose-phosphate shunt // inferred from reviewed computational analysis///0006364 // rRNA processing // inferred from reviewed computational analysis///0009793 // embryo development ending in seed dormancy // inferred from reviewed computational analysis///0010027 // thylakoid membrane organization // inferred from reviewed computational analysis///0010228 // vegetative to reproductiv…
248252_at	AT5G53250	AGP22	0.0150927	0.00264701	12.4838	0006826 // iron ion transport // inferred from reviewed computational analysis///0010054 // trichoblast differentiation // inferred from reviewed computational analysis///0010106 // cellular response to iron ion starvation // inferred from reviewed computational analysis///0010167 // response to nitrate // inferred from reviewed computational analysis///0015706 // nitrate transport // inferred fr…
248178_at	AT5G54370		0.00635097	0.000431023	6.54994
248094_at	AT5G55220		0.00285464	2.84127e-05	3.61167	0000023 // maltose metabolic process // inferred from reviewed computational analysis///0000413 // protein peptidyl-prolyl isomerization // inferred from electronic annotation///0006457 // protein folding // inferred from electronic annotation///0006457 // protein folding // inferred from sequence or structural similarity///0009902 // chloroplast relocation // inferred from reviewed computational…
248057_at	AT5G55520		0.0274967	0.00783863	3.50878	0000226 // microtubule cytoskeleton organization // inferred from reviewed computational analysis///0000278 // mitotic cell cycle // inferred from reviewed computational analysis///0000911 // cytokinesis by cell plate formation // inferred from reviewed computational analysis///0001708 // cell fate specification // inferred from reviewed computational analysis///0007018 // microtubule-based movem…
248028_at	AT5G55620		0.005123	0.000241123	3.31467	0071281 // cellular response to iron ion // inferred from expression pattern///0071369 // cellular response to ethylene stimulus // inferred from expression pattern///0071732 // cellular response to nitric oxide // inferred from expression pattern
248075_at	AT5G55740	CRR21	0.00424983	0.000158014	3.40075	0009965 // leaf morphogenesis // inferred from reviewed computational analysis///0016556 // mRNA modification // inferred from mutant phenotype///0016556 // mRNA modification // inferred from reviewed computational analysis///0030154 // cell differentiation // inferred from reviewed computational analysis///0045893 // positive regulation of transcription, DNA-dependent // inferred from reviewed c…
248040_at	AT5G55970		0.0107581	0.00135116	3.75427
248050_at	AT5G56100		0.0181918	0.00380174	3.48321	0019915 // lipid storage // inferred from sequence or structural similarity
247965_at	AT5G56540	AGP14	0.0249154	0.00664901	11.3626	0048767 // root hair elongation // inferred from mutant phenotype
247962_at	AT5G56580	MKK6	0.0120667	0.00174526	3.5962	0000165 // MAPK cascade // inferred from direct assay///0000165 // MAPK cascade // traceable author statement///0000187 // activation of MAPK activity // inferred from direct assay///0000187 // activation of MAPK activity // traceable author statement///0006275 // regulation of DNA replication // inferred from reviewed computational analysis///0006468 // protein phosphorylation // inferred from e…
247954_at	AT5G56870	BGAL4	0.00259785	1.02672e-05	28.6797	0005975 // carbohydrate metabolic process // inferred from electronic annotation///0008152 // metabolic process // inferred from electronic annotation
247943_at	AT5G57170		0.00343175	8.4904e-05	5.71422	0006949 // syncytium formation // inferred from reviewed computational analysis///0006954 // inflammatory response // inferred from sequence or structural similarity///0051707 // response to other organism // inferred from sequence or structural similarity
247878_at	AT5G57760		0.00773968	0.000654403	4.1678
247816_at	AT5G58260		0.00445746	0.000177566	5.50204	0000023 // maltose metabolic process // inferred from reviewed computational analysis///0006098 // pentose-phosphate shunt // inferred from reviewed computational analysis///0009817 // defense response to fungus, incompatible interaction // inferred from direct assay///0010207 // photosystem II assembly // inferred from reviewed computational analysis///0010258 // NADH dehydrogenase complex (plas…
247856_at	AT5G58300		0.0160928	0.00302916	3.21276	0006468 // protein phosphorylation // inferred from electronic annotation///0006468 // protein phosphorylation // inferred from sequence or structural similarity///0007169 // transmembrane receptor protein tyrosine kinase signaling pathway // inferred from sequence or structural similarity///0010075 // regulation of meristem growth // inferred from reviewed computational analysis///0016310 // pho…
247826_at	AT5G58480		0.0030759	5.51703e-05	3.41507	0005975 // carbohydrate metabolic process // inferred from electronic annotation///0006952 // defense response // inferred from electronic annotation///0008152 // metabolic process // inferred from electronic annotation///0008356 // asymmetric cell division // inferred from reviewed computational analysis///0009736 // cytokinin mediated signaling pathway // inferred from reviewed computational an…
247754_at	AT5G59080		0.00699206	0.000534919	6.73874	0006979 // response to oxidative stress // inferred from mutant phenotype
247714_at	AT5G59340	WOX2	0.012544	0.00188292	3.21478	0006351 // transcription, DNA-dependent // inferred from electronic annotation///0006355 // regulation of transcription, DNA-dependent // inferred from electronic annotation///0007275 // multicellular organismal development // inferred from electronic annotation///0008284 // positive regulation of cell proliferation // inferred from genetic interaction///0009880 // embryonic pattern specification…
247678_at	AT5G59520	ZIP2	0.0169658	0.00335915	4.23599	0000041 // transition metal ion transport // inferred from reviewed computational analysis///0006810 // transport // inferred from electronic annotation///0006811 // ion transport // inferred from electronic annotation///0006826 // iron ion transport // inferred from reviewed computational analysis///0006829 // zinc ion transport // inferred from sequence or structural similarity///0006829 // zin…
247651_at	AT5G59870	HTA6	0.0109105	0.00141231	3.08233	0006334 // nucleosome assembly // inferred from electronic annotation///0008283 // cell proliferation // inferred from reviewed computational analysis
247667_at	AT5G60150		0.00872332	0.000867512	4.09386	0048451 // petal formation // inferred from reviewed computational analysis///0048453 // sepal formation // inferred from reviewed computational analysis
247638_at	AT5G60490	FLA12	0.0147368	0.00255156	3.83273	0009834 // secondary cell wall biogenesis // inferred from mutant phenotype
247645_at	AT5G60530		0.00285464	2.84144e-05	4.47421	0000041 // transition metal ion transport // inferred from reviewed computational analysis
247586_at	AT5G60660	PIP2;4	0.00299442	3.49359e-05	4.17334	0006810 // transport // inferred from electronic annotation///0006810 // transport // inferred from sequence or structural similarity///0006826 // iron ion transport // inferred from reviewed computational analysis///0006833 // water transport // inferred from electronic annotation///0006833 // water transport // inferred from reviewed computational analysis///0009737 // response to abscisic acid…
247522_at	AT5G61340		0.0123006	0.00180981	4.95268
247549_at	AT5G61420	MYB28	0.0101042	0.00118174	10.7224	0006351 // transcription, DNA-dependent // inferred from electronic annotation///0006355 // regulation of transcription, DNA-dependent // inferred from expression pattern///0006355 // regulation of transcription, DNA-dependent // inferred from sequence or structural similarity///0009617 // response to bacterium // inferred from mutant phenotype///0009625 // response to insect // inferred from exp…
247527_at	AT5G61480	PXY	0.00774811	0.000657539	3.9658	0006468 // protein phosphorylation // inferred from electronic annotation///0006468 // protein phosphorylation // inferred from sequence or structural similarity///0007275 // multicellular organismal development // inferred from electronic annotation///0009855 // determination of bilateral symmetry // inferred from reviewed computational analysis///0009887 // organ morphogenesis // inferred from …
247463_at	AT5G62210		0.00601355	0.000382888	5.4646	0009611 // response to wounding // inferred from reviewed computational analysis///0009695 // jasmonic acid biosynthetic process // inferred from reviewed computational analysis///0009718 // anthocyanin-containing compound biosynthetic process // inferred from reviewed computational analysis///0009744 // response to sucrose stimulus // inferred from reviewed computational analysis///0010224 // re…
247477_at	AT5G62340		0.0148632	0.0025867	17.2955	0043086 // negative regulation of catalytic activity // inferred from electronic annotation///0048527 // lateral root development // inferred from reviewed computational analysis///0048589 // developmental growth // inferred from reviewed computational analysis///0048765 // root hair cell differentiation // inferred from reviewed computational analysis
247482_at	AT5G62410	SMC2	0.00652449	0.000457712	3.98176	0000911 // cytokinesis by cell plate formation // inferred from reviewed computational analysis///0006260 // DNA replication // inferred from reviewed computational analysis///0006261 // DNA-dependent DNA replication // inferred from reviewed computational analysis///0006270 // DNA replication initiation // inferred from reviewed computational analysis///0006275 // regulation of DNA replication /…
247443_at	AT5G62720		0.00626586	0.000414611	3.52414	0007623 // circadian rhythm // inferred from reviewed computational analysis
247362_at	AT5G63140	ATPAP29	0.00968539	0.00107456	7.92583
247377_at	AT5G63180		0.00334133	6.99777e-05	7.62626	0045490 // pectin catabolic process // inferred from electronic annotation
247337_at	AT5G63660	PDF2.5	0.0249747	0.00666804	3.54414	0006952 // defense response // inferred from electronic annotation///0006952 // defense response // inferred from sequence or structural similarity///0031640 // killing of cells of other organism // inferred from electronic annotation///0050832 // defense response to fungus // inferred from electronic annotation
247297_at	AT5G64100		0.00461369	0.000189009	6.96107	0006979 // response to oxidative stress // inferred from electronic annotation///0010167 // response to nitrate // inferred from reviewed computational analysis///0015698 // inorganic anion transport // inferred from reviewed computational analysis///0015706 // nitrate transport // inferred from reviewed computational analysis///0042744 // hydrogen peroxide catabolic process // inferred from elec…
247288_at	AT5G64330	NPH3	0.0258411	0.0070183	3.02229	0000271 // polysaccharide biosynthetic process // inferred from reviewed computational analysis///0007165 // signal transduction // inferred from electronic annotation///0009416 // response to light stimulus // inferred from sequence or structural similarity///0009637 // response to blue light // inferred from reviewed computational analysis///0009638 // phototropism // inferred from mutant pheno…
247278_at	AT5G64380		0.00631293	0.000420762	3.30827	0005975 // carbohydrate metabolic process // inferred from electronic annotation///0005975 // carbohydrate metabolic process // inferred from sequence or structural similarity///0016556 // mRNA modification // inferred from reviewed computational analysis
247266_at	AT5G64570	XYL4	0.00935563	0.00101178	3.62032	0005975 // carbohydrate metabolic process // inferred from electronic annotation///0008152 // metabolic process // inferred from electronic annotation///0045493 // xylan catabolic process // inferred from direct assay
247246_at	AT5G64620	C/VIF2	0.00445746	0.000177862	3.16779	0043086 // negative regulation of catalytic activity // inferred from direct assay///0080167 // response to karrikin // inferred from expression pattern
247252_at	AT5G64770	RGF9	0.00990604	0.0011245	8.14499	0008284 // positive regulation of cell proliferation // inferred from direct assay///0009958 // positive gravitropism // inferred from mutant phenotype///0022622 // root system development // inferred from mutant phenotype///0030154 // cell differentiation // inferred from direct assay///0032880 // regulation of protein localization // inferred from direct assay///0048527 // lateral root developm…
247218_at	AT5G65010	ASN2	0.0111518	0.00146923	5.05233	0006529 // asparagine biosynthetic process // inferred from electronic annotation///0006529 // asparagine biosynthetic process // inferred from genetic interaction///0006529 // asparagine biosynthetic process // inferred from sequence or structural similarity///0006541 // glutamine metabolic process // inferred from electronic annotation///0008152 // metabolic process // inferred from electronic …
247094_at	AT5G66280	GMD1	0.0116875	0.00161618	4.4965	0009225 // nucleotide-sugar metabolic process // inferred from sequence or structural similarity///0019673 // GDP-mannose metabolic process // inferred from electronic annotation///0042351 // 'de novo' GDP-L-fucose biosynthetic process // inferred from electronic annotation///0044237 // cellular metabolic process // inferred from electronic annotation
247091_at	AT5G66390		0.00710475	0.000558211	3.39141	0006979 // response to oxidative stress // inferred from electronic annotation///0009809 // lignin biosynthetic process // inferred from mutant phenotype///0042744 // hydrogen peroxide catabolic process // inferred from electronic annotation///0055114 // oxidation-reduction process // inferred from electronic annotation
247100_at	AT5G66520		0.0289141	0.00856129	5.12406	0016556 // mRNA modification // inferred from reviewed computational analysis
247101_at	AT5G66530		0.00259785	1.01379e-05	3.90774	0005975 // carbohydrate metabolic process // inferred from electronic annotation///0006012 // galactose metabolic process // inferred from sequence or structural similarity
247074_at	AT5G66590		0.00754851	0.000625305	3.83734
247039_at	AT5G67270	ATEB1C	0.020633	0.00478465	3.65406	0000278 // mitotic cell cycle // inferred from reviewed computational analysis///0007049 // cell cycle // inferred from electronic annotation///0007067 // mitosis // inferred from electronic annotation///0009652 // thigmotropism // inferred from mutant phenotype///0010228 // vegetative to reproductive phase transition of meristem // inferred from reviewed computational analysis///0016572 // histo…
244936_at		ndhA	0.012157	0.00177286	3.06685	0055114 // oxidation-reduction process // inferred from electronic annotation
244937_at		ndhH	0.015732	0.00290673	3.19137	0055114 // oxidation-reduction process // inferred from electronic annotation
244967_at		psaJ	0.0140552	0.00234856	3.74195	0015979 // photosynthesis // inferred from electronic annotation
244968_at		rpl33	0.0231364	0.00582036	4.23766	0006412 // translation // inferred from electronic annotation
244978_at		rpoA	0.0100299	0.00116273	3.57102	0006351 // transcription, DNA-dependent // inferred from electronic annotation
244979_at		rps11	0.00562905	0.000312444	4.55565	0006412 // translation // inferred from electronic annotation
244980_at		rpl36	0.0196111	0.0043415	5.72643	0006412 // translation // inferred from electronic annotation
244981_at		rps8	0.013028	0.00202543	5.44831	0006412 // translation // inferred from electronic annotation
244982_at		rpl14	0.00809591	0.00072956	4.23923	0006412 // translation // inferred from electronic annotation
244983_at		rpl16	0.00334133	6.94871e-05	4.69983	0006412 // translation // inferred from electronic annotation
244985_at		rpl22	0.0105239	0.00130213	3.58231	0006412 // translation // inferred from electronic annotation
244986_at		rps19	0.0160974	0.00303106	4.15818	0006412 // translation // inferred from electronic annotation
244987_s_at		rpl2	0.0179367	0.00370926	3.16321	0006412 // translation // inferred from electronic annotation
244988_s_at		rpl23	0.00537125	0.000277431	4.65115	0006412 // translation // inferred from electronic annotation
244996_at		rps2	0.0125446	0.00188805	4.89066	0006412 // translation // inferred from electronic annotation
244997_at		rpoC2	0.00586243	0.000357536	3.82063	0006351 // transcription, DNA-dependent // inferred from electronic annotation
244998_at		rpoC1	0.0150927	0.00264624	3.38178	0006351 // transcription, DNA-dependent // inferred from electronic annotation
245003_at		psbC	0.0272762	0.00773112	3.10977	0009767 // photosynthetic electron transport chain // inferred from electronic annotation///0009772 // photosynthetic electron transport in photosystem II // inferred from electronic annotation///0015979 // photosynthesis // inferred from electronic annotation///0018298 // protein-chromophore linkage // inferred from electronic annotation///0019684 // photosynthesis, light reaction // inferred fr…
245008_at		ycf3	0.0117882	0.00165774	4.26677
245010_at		ndhJ	0.00620288	0.000405662	3.48185	0055114 // oxidation-reduction process // inferred from electronic annotation
245017_at		psaI	0.00501199	0.000229252	3.02755	0015979 // photosynthesis // inferred from electronic annotation
245019_at		cemA	0.0101871	0.00120549	3.06251
245049_at		rps16	0.00752781	0.00062095	3.83612	0006412 // translation // inferred from electronic annotation
