# Supplementary material for: Heterologous Overexpression of Poplar SnRK2 Genes Enhanced Salt Stress Tolerance in Arabidopsis thaliana
Source: Front Plant Sci. 2016 May 9;7:612. doi: 10.3389/fpls.2016.00612 (PMC4860416; doi:10.3389/fpls.2016.00612)
Supplement: Table S6 — GO term analysis on wild-type-specific upregulated genes by salt treatment. [file Table6.XLSX]

## Sheet: Table S６
Table S6. GO term analysis on wild-type-specific upregulated genes by salt treatment
GO biological process	Fold Enrichment	p-value
respiratory burst	36.1111	1.91e-13
respiratory burst involved in defense response	36.1111	1.91e-13
detection of biotic stimulus	23.3333	5e-05
negative regulation of programmed cell death	23.0769	5.97e-10
negative regulation of cell death	21.8182	1.03e-09
olefin biosynthetic process	21.6216	9.15e-06
olefin metabolic process	21.6216	9.15e-06
ethylene biosynthetic process	21.6216	9.15e-06
ethylene metabolic process	21.6216	9.15e-06
alkene biosynthetic process	21.6216	9.15e-06
cellular alkene metabolic process	21.6216	9.15e-06
response to molecule of bacterial origin	21.2121	9.42e-05
jasmonic acid mediated signaling pathway	20.9877	2.31e-14
cellular response to jasmonic acid stimulus	20.7317	2.51e-14
salicylic acid biosynthetic process	20	3.18e-10
MAPK cascade	19.403	4.73e-10
phenol-containing compound biosynthetic process	19.1176	5.52e-10
salicylic acid metabolic process	19.1176	5.52e-10
signal transduction by protein phosphorylation	18.8406	6.42e-10
regulation of plant-type hypersensitive response	18.75	2.26e-17
regulation of hydrogen peroxide metabolic process	18.1818	5.06e-07
phenol-containing compound metabolic process	18.0556	1.08e-09
regulation of cellular response to stress	17.7966	5.87e-17
regulation of programmed cell death	17.1875	1.45e-17
regulation of innate immune response	17.1875	1.55e-17
regulation of immune response	17.1875	1.66e-17
regulation of immune system process	16.9231	2.04e-17
salicylic acid mediated signaling pathway	16.8224	9.3e-14
regulation of cell death	16.7939	2.5e-17
protein targeting to membrane	16.8	2.19e-16
cellular response to salicylic acid stimulus	16.6667	1.14e-13
regulation of reactive oxygen species metabolic process	16.3934	1.43e-06
response to chitin	16.4062	3.48e-16
establishment of protein localization to membrane	16.2791	3.96e-16
protein localization to membrane	16.2791	3.96e-16
benzene-containing compound metabolic process	16.0494	5.14e-09
systemic acquired resistance, salicylic acid mediated signaling pathway	15.7895	4.18e-08
response to organonitrogen compound	15.5556	9.04e-16
jasmonic acid biosynthetic process	15.3846	0.00548
immune effector process	15.2941	8.46e-09
response to jasmonic acid	15.3285	1.31e-15
systemic acquired resistance	14.1844	4.03e-14
hyperosmotic salinity response	14.2857	0.00931
negative regulation of defense response	14.1176	1.53e-07
regulation of defense response	13.8728	3.06e-17
detection of stimulus	13.4615	0.00196
abscisic acid-activated signaling pathway	13.5135	8.92e-06
regulation of multi-organism process	13.6364	0.0122
response to salicylic acid	13.1944	9.36e-13
cellular response to abscisic acid stimulus	13.1579	1.22e-05
jasmonic acid metabolic process	13.0435	0.0151
defense response, incompatible interaction	12.9412	6.04e-15
regulation of response to stress	12.9032	1.5e-16
ethylene-activated signaling pathway	12.3077	0.000705
cellular response to acid chemical	11.9816	2.2e-17
single-organism membrane organization	11.413	4.39e-13
response to endoplasmic reticulum stress	11.3208	1.81e-06
cellular response to ethylene stimulus	11.2676	0.00134
endoplasmic reticulum unfolded protein response	11.1111	0.0352
cellular response to alcohol	11.1111	5.52e-05
defense response to bacterium	11.0092	2.35e-06
response to unfolded protein	10.9091	0.0384
cellular response to unfolded protein	10.9091	0.0384
cellular response to topologically incorrect protein	10.9091	0.04
defense response to fungus	10.9091	1.57e-10
cellular response to organic cyclic compound	10.8434	1.71e-10
immune system process	10.8209	1.51e-18
response to fungus	10.8108	8.38e-15
response to wounding	10.7843	1.57e-05
negative regulation of response to stimulus	10.6195	3.57e-06
phosphorelay signal transduction system	10.2564	0.0027
membrane fusion	10.1266	0.00292
regulation of response to stimulus	9.95851	4.93e-14
response to ethylene	9.70149	2.23e-06
cellular response to oxygen-containing compound	9.66543	4.12e-15
innate immune response	9.60699	2.49e-12
immune response	9.52381	3e-12
response to water deprivation	9.17431	0.000318
monocarboxylic acid biosynthetic process	9.13706	2.81e-09
response to water	9.00901	0.000379
response to nitrogen compound	8.83534	1.36e-11
membrane organization	8.75	7.1e-11
intracellular signal transduction	8.40336	6.35e-10
cellular response to lipid	8.33333	0.000781
response to bacterium	8.28402	3.6e-06
defense response to other organism	8.08625	8.18e-16
organic hydroxy compound biosynthetic process	7.95455	6.05e-06
protein targeting	7.84983	3.75e-11
hormone-mediated signaling pathway	7.82313	3.87e-11
response to organic cyclic compound	7.72201	2.92e-09
single-organism cellular localization	7.71812	5.19e-11
cellular response to hormone stimulus	7.54098	8.22e-11
cellular response to endogenous stimulus	7.51634	9.2e-11
response to topologically incorrect protein	7.33945	0.0285
response to acid chemical	7.25275	2.51e-16
response to abscisic acid	7.10059	0.000279
defense response	6.88406	1.18e-18
intracellular protein transport	6.86567	5.86e-10
response to other organism	6.77291	4.86e-16
response to external biotic stimulus	6.77291	4.86e-16
cellular protein localization	6.6474	1.12e-09
cellular response to chemical stimulus	6.58174	5.95e-14
response to biotic stimulus	6.56371	1.26e-15
cellular macromolecule localization	6.49718	1.74e-09
cellular response to organic substance	6.2645	3.09e-11
response to endogenous stimulus	6.2069	5.36e-16
organic hydroxy compound metabolic process	6.1674	0.000138
response to alcohol	6.06061	0.00147
protein phosphorylation	6.04982	6.48e-06
single-organism intracellular transport	6.03015	2.54e-09
response to oxygen-containing compound	5.93343	3.95e-18
response to hormone	5.87084	4.29e-12
protein transport	5.86735	1.37e-08
establishment of protein localization	5.82278	1.55e-08
protein localization	5.75	2.08e-08
response to external stimulus	5.64972	8.04e-17
response to lipid	5.55556	0.00134
signal transduction	5.52995	2.13e-14
intracellular transport	5.50459	1.64e-08
organic acid biosynthetic process	5.49133	3.34e-06
carboxylic acid biosynthetic process	5.49133	3.34e-06
single organism signaling	5.30973	7.41e-14
signaling	5.30973	7.56e-14
negative regulation of cellular process	5.28455	0.0023
cell communication	5.27671	2.81e-16
establishment of localization in cell	5.23013	1.67e-08
multi-organism process	5.11696	7.16e-13
macromolecule localization	4.97	5.04e-08
cellular response to stress	4.96	1.73e-05
cellular localization	4.95	5.41e-08
response to organic substance	4.92	1.06e-15
monocarboxylic acid metabolic process	4.74	1.41e-05
small molecule biosynthetic process	4.56	2.7e-05
phosphorylation	4.5	0.000192
negative regulation of biological process	4.47	0.000488
response to chemical	4.43	3.04e-18
cellular response to stimulus	4.38	2.55e-14
organic substance transport	4.29	7.64e-08
response to stress	4	2.58e-16
carboxylic acid metabolic process	3.4	0.00149
oxoacid metabolic process	3.33	0.00109
organic acid metabolic process	3.33	0.00112
single-organism transport	3.3	9.33e-07
single-organism localization	3.26	1.24e-06
response to stimulus	2.94	1.61e-14
transport	2.9	2.28e-05
establishment of localization	2.85	3.62e-05
localization	2.81	2.81e-05
small molecule metabolic process	2.67	0.0151
regulation of cellular process	2.53	1.04e-05
regulation of biological process	2.29	0.000123
biological regulation	2.07	0.00143
single-organism cellular process	2.06	1.54e-06
single-organism metabolic process	2.06	0.00164
cellular biosynthetic process	2.04	0.017
organic substance biosynthetic process	1.97	0.0356
single-organism process	1.8	1.41e-05
cellular process	1.61	0.00172
Unclassified	0.86	0
Terms in bold indicate the unique GO terms in the wild-type-specific upregulated genes.
