# Supplementary material for: Heterologous Overexpression of Poplar SnRK2 Genes Enhanced Salt Stress Tolerance in Arabidopsis thaliana
Source: Front Plant Sci. 2016 May 9;7:612. doi: 10.3389/fpls.2016.00612 (PMC4860416; doi:10.3389/fpls.2016.00612)
Supplement: Table S7 — GO term analysis on PrSnRK2.7 overexpressor-specific upregulated genes by salt treatment. [file Table7.XLSX]

## Sheet: Table S７
Table S7. GO term analysis on PrSnRK2.7 overexpressor-specific upregulated genes by salt treatment
GO biological process	Fold Enrichment	p-value
purine nucleoside transmembrane transport	26.6667	0.0337
response to desiccation	22.2222	8.51e-06
cold acclimation	17.8571	0.022
para-aminobenzoic acid metabolic process	15.5556	0.000859
proline transport	11.7021	8.88e-06
neutral amino acid transport	11.2245	1.42e-05
heat acclimation	10.5882	0.000517
response to cyclopentenone	9.27152	1.36e-06
cellular response to water stimulus	8.33333	0.0487
cellular response to water deprivation	8.33333	0.0487
secondary metabolite catabolic process	8.04598	1.13e-09
toxin catabolic process	8.04598	1.13e-09
response to water deprivation	8.03109	3.36e-15
jasmonic acid biosynthetic process	8.0292	0.00039
toxin metabolic process	8.0292	3.4e-10
response to water	7.86802	5.69e-15
response to toxic substance	7.62712	0.00732
jasmonic acid metabolic process	7.31707	0.00029
hyperosmotic salinity response	7.28477	0.000967
cellular response to phosphate starvation	7.28477	0.000967
organic anion transport	6.82927	8.4e-12
amino acid transport	6.64653	1.27e-08
carboxylic acid transport	6.05263	2.67e-08
organic acid transport	5.97403	3.36e-08
anion transmembrane transport	5.64972	0.0298
response to chitin	5.48246	2.75e-08
response to organonitrogen compound	5.42797	1.29e-08
response to jasmonic acid	5.32787	1.92e-08
anion transport	5.17464	1.07e-13
response to abscisic acid	5.16667	4.09e-10
abscisic acid-activated signaling pathway	4.95	0.00659
response to wounding	4.95	9.22e-05
hyperosmotic response	4.85	0.0443
cellular response to abscisic acid stimulus	4.79	0.00941
aromatic amino acid family metabolic process	4.52	0.0379
benzene-containing compound metabolic process	4.49	0.0184
secondary metabolic process	4.42	4.32e-09
response to alcohol	4.41	2.2e-08
response to acid chemical	4.39	3.12e-22
cellular response to extracellular stimulus	4.08	0.00602
cellular response to acid chemical	4.02	2.13e-07
cellular response to external stimulus	4.02	0.00726
response to ethylene	3.98	0.00104
response to extracellular stimulus	3.86	0.012
response to lipid	3.84	3.16e-07
regulation of cellular response to stress	3.83	0.0131
response to endogenous stimulus	3.74	3.75e-20
response to oxygen-containing compound	3.67	1.14e-23
nitrogen compound transport	3.6	1.28e-07
response to inorganic substance	3.55	3.31e-11
response to fungus	3.54	2.57e-05
response to nitrogen compound	3.5	5.36e-06
cellular response to oxygen-containing compound	3.45	2.45e-06
response to hormone	3.42	9.17e-14
regulation of response to stress	3.18	0.009
response to organic substance	3.1	9.58e-20
ion transport	3.06	3.6e-08
response to organic cyclic compound	3.05	0.000542
response to chemical	2.93	1.65e-24
response to salt stress	2.92	0.0323
response to osmotic stress	2.85	0.0282
regulation of response to stimulus	2.8	0.0155
response to other organism	2.8	1.57e-07
response to external biotic stimulus	2.8	1.57e-07
monocarboxylic acid metabolic process	2.74	1.77e-05
response to biotic stimulus	2.72	4.52e-07
single-organism catabolic process	2.67	2.17e-05
response to external stimulus	2.66	5.9e-10
immune system process	2.62	0.0303
cellular response to chemical stimulus	2.45	0.000344
defense response	2.4	7.58e-05
defense response to other organism	2.35	0.0251
oxoacid metabolic process	2.3	2.54e-05
organic acid metabolic process	2.3	2.65e-05
cellular response to stress	2.28	0.0461
response to stress	2.21	3.69e-11
carboxylic acid metabolic process	2.14	0.00182
organic substance transport	2.11	0.00152
multi-organism process	2.1	0.00111
response to stimulus	2.01	9.73e-16
single-organism localization	2	2.44e-05
single-organism transport	2	3.51e-05
catabolic process	1.91	0.0241
cell communication	1.85	0.0382
small molecule metabolic process	1.81	0.0163
transport	1.78	0.00213
cellular response to stimulus	1.78	0.0141
localization	1.77	0.00134
establishment of localization	1.75	0.0042
single-organism metabolic process	1.56	0.000525
single-organism cellular process	1.42	0.00325
single-organism process	1.41	3.1e-05
Unclassified	1.1	0
cellular nitrogen compound metabolic process	0.5	0.017
RNA metabolic process	0.39	0.0489
nucleobase-containing compound metabolic process	0.38	0.000651
gene expression	0.36	0.0104
nucleic acid metabolic process	0.32	0.000423
organelle organization	0.26	0.0323
Terms in bold indicate the unique GO terms in PtSnRK2.7 overepressor-specific upregulated genes.
