# Supplementary material for: Heterologous Overexpression of Poplar SnRK2 Genes Enhanced Salt Stress Tolerance in Arabidopsis thaliana
Source: Front Plant Sci. 2016 May 9;7:612. doi: 10.3389/fpls.2016.00612 (PMC4860416; doi:10.3389/fpls.2016.00612)
Supplement: Table S8 — GO term analysis on commonly upregulated genes between the wild type and PtSnRK2.7 overexpressor by salt treatment. [file Table8.XLSX]

## Sheet: Table S８
Table S8. GO term analysis on commonly upregulated genes between the wild type and PtSnRK2.7 overexpressor by salt treatment
GO biological process	Fold Enrichment	p-value
jasmonic acid biosynthetic process	21.9178	1.89e-13
jasmonic acid metabolic process	21.5909	2.65e-16
response to symbiotic fungus	19.2308	0.0131
response to symbiont	19.2308	0.0131
defense response by callose deposition	18.4211	0.000255
detection of biotic stimulus	14.0351	0.000266
polysaccharide localization	13.7255	0.00198
callose localization	13.7255	0.00198
response to jasmonic acid	13.41	4.26e-25
salicylic acid metabolic process	13.1783	6.99e-11
salicylic acid biosynthetic process	12.9032	5.13e-10
jasmonic acid mediated signaling pathway	12.9032	5.03e-13
cellular response to jasmonic acid stimulus	12.8205	5.54e-13
MAPK cascade	12.5	8.24e-10
phenol-containing compound metabolic process	12.5	1.65e-10
phenol-containing compound biosynthetic process	12.4031	9.91e-10
benzene-containing compound metabolic process	12.2581	7.11e-12
signal transduction by protein phosphorylation	12.2137	1.19e-09
salicylic acid mediated signaling pathway	11.8227	3.22e-15
cellular response to salicylic acid stimulus	11.7073	4.18e-15
regulation of hydrogen peroxide metabolic process	11.5385	1.79e-06
regulation of reactive oxygen species metabolic process	11.2069	5.03e-07
negative regulation of programmed cell death	11	1.47e-05
response to wounding	10.7692	2.95e-12
negative regulation of cell death	10.4762	2.37e-05
negative regulation of defense response	10.4938	2.43e-09
systemic acquired resistance, salicylic acid mediated signaling pathway	10.4167	6.1e-08
regulation of plant-type hypersensitive response	10.3286	1.47e-12
response to salicylic acid	10.2564	1.56e-16
hyperosmotic salinity response	9.87654	0.00363
response to cyclopentenone	9.87654	0.00363
regulation of programmed cell death	9.87654	1.71e-13
regulation of innate immune response	9.87654	1.83e-13
regulation of cellular response to stress	9.82143	3.81e-12
regulation of immune response	9.83607	1.97e-13
regulation of immune system process	9.7166	2.44e-13
regulation of cell death	9.63855	3.01e-13
cellular response to abscisic acid stimulus	9.65517	7.26e-07
regulation of multi-organism process	9.41176	0.00517
abscisic acid-activated signaling pathway	9.28571	5.03e-06
response to karrikin	9.21053	0.0255
protein targeting to membrane	9.20502	1.42e-11
response to fungus	8.98345	2.22e-21
establishment of protein localization to membrane	8.94309	2.56e-11
protein localization to membrane	8.94309	2.56e-11
systemic acquired resistance	8.58209	1.51e-11
monocarboxylic acid biosynthetic process	8.55615	6.05e-17
cellular response to acid chemical	8.47458	1.12e-18
cellular response to alcohol	8.18713	5.61e-06
detection of stimulus	8.16327	0.0151
ethylene-activated signaling pathway	8	0.00127
negative regulation of response to stimulus	7.90698	1.84e-07
endoplasmic reticulum unfolded protein response	7.84314	0.0201
response to unfolded protein	7.69231	0.0225
cellular response to unfolded protein	7.69231	0.0225
cellular response to topologically incorrect protein	7.61905	0.0237
cellular response to organic cyclic compound	7.59494	5.18e-11
regulation of defense response	7.57576	1.49e-11
response to organic cyclic compound	7.52033	3.53e-18
defense response, incompatible interaction	7.40741	8.79e-11
cellular response to ethylene stimulus	7.35294	0.00272
response to chitin	7.37705	1.59e-07
secondary metabolite catabolic process	7.14286	0.00351
toxin catabolic process	7.14286	0.00351
regulation of response to stress	7.06215	7.02e-11
response to ethylene	7.05882	3.24e-07
response to organonitrogen compound	7.03125	3.4e-07
cellular response to lipid	7.01754	3.72e-06
response to endoplasmic reticulum stress	6.93069	4.46e-05
cellular response to oxygen-containing compound	6.83594	9.63e-16
toxin metabolic process	6.80272	0.00544
phosphorelay signal transduction system	6.71141	0.00627
defense response to fungus	6.34921	1.8e-07
aromatic amino acid family metabolic process	6.33803	0.0302
response to water deprivation	6.28019	0.000429
single-organism membrane organization	6.28571	2.52e-08
response to acid chemical	6.23557	3.37e-24
intracellular signal transduction	6.19469	4.58e-11
response to water	6.16114	0.000531
response to abscisic acid	5.919	1.73e-06
hormone-mediated signaling pathway	5.9034	6.96e-13
cellular response to hormone stimulus	5.86207	2.87e-13
cellular response to endogenous stimulus	5.8319	3.37e-13
innate immune response	5.74713	6.2e-09
immune response	5.69476	7.52e-09
regulation of response to stimulus	5.67686	2.93e-09
response to alcohol	5.58511	6.11e-07
defense response to bacterium	5.31401	0.0176
response to bacterium	5.2795	6.99e-05
monocarboxylic acid metabolic process	5.23691	2.77e-15
organic acid biosynthetic process	5.16717	1.11e-11
carboxylic acid biosynthetic process	5.16717	1.11e-11
response to lipid	5.16854	3.81e-07
response to hormone	5.14933	1.62e-18
immune system process	5.09804	3.05e-08
organic hydroxy compound biosynthetic process	5.07463	0.000125
response to other organism	5.02618	3.2e-17
response to external biotic stimulus	5.02618	3.2e-17
cellular response to organic substance	5	3.67e-14
response to salt stress	4.93	3.22e-05
cellular response to chemical stimulus	4.91	4.01e-15
response to biotic stimulus	4.87	1.13e-16
membrane organization	4.83	3.29e-06
response to endogenous stimulus	4.71	9.74e-18
response to osmotic stress	4.6	9.24e-05
response to oxygen-containing compound	4.41	7.07e-19
organic hydroxy compound metabolic process	4.4	0.000185
defense response to other organism	4.25	6.21e-08
response to external stimulus	4.24	1.24e-17
protein targeting	4.12	2.55e-05
small molecule biosynthetic process	4.08	8.1e-09
single-organism cellular localization	4.06	3.39e-05
response to organic substance	4.01	1.8e-19
carboxylic acid metabolic process	4	5.76e-13
oxoacid metabolic process	3.82	1.5e-12
organic acid metabolic process	3.82	1.58e-12
response to nitrogen compound	3.8	0.00321
multi-organism process	3.77	1.25e-12
signal transduction	3.71	1.95e-11
cellular response to stress	3.7	1.2e-05
cellular protein localization	3.64	0.00012
intracellular protein transport	3.61	0.000277
single organism signaling	3.57	8.11e-11
cellular macromolecule localization	3.57	0.000178
signaling	3.57	8.29e-11
response to chemical	3.56	3.01e-21
cell communication	3.52	2.09e-12
negative regulation of biological process	3.46	0.00017
defense response	3.43	2.15e-07
protein phosphorylation	3.37	0.0169
protein transport	3.22	0.00111
establishment of protein localization	3.2	0.00124
single-organism intracellular transport	3.17	0.00146
protein localization	3.15	0.0016
macromolecule localization	3.03	0.000238
response to stress	2.97	9.7e-15
intracellular transport	2.9	0.00679
cellular response to stimulus	2.89	1.41e-09
small molecule metabolic process	2.86	3.14e-08
response to abiotic stimulus	2.78	2.85e-06
establishment of localization in cell	2.64	0.0308
cellular localization	2.6	0.0259
organic substance transport	2.58	0.00174
single-organism biosynthetic process	2.51	4.53e-06
response to stimulus	2.47	8.84e-17
single-organism localization	2.18	0.00236
single-organism transport	2.15	0.00447
single-organism metabolic process	2.04	6.16e-08
localization	2	0.00711
transport	1.94	0.0414
single-organism cellular process	1.84	2.61e-08
organic substance biosynthetic process	1.77	0.00439
regulation of cellular process	1.75	0.0398
cellular biosynthetic process	1.71	0.0295
biosynthetic process	1.69	0.0195
regulation of biological process	1.69	0.0438
single-organism process	1.61	1.7e-06
cellular metabolic process	1.56	0.00152
metabolic process	1.51	0.000204
cellular process	1.43	0.00306
Unclassified	1.01	0
