# Supplementary material for: Heterologous Overexpression of Poplar SnRK2 Genes Enhanced Salt Stress Tolerance in Arabidopsis thaliana
Source: Front Plant Sci. 2016 May 9;7:612. doi: 10.3389/fpls.2016.00612 (PMC4860416; doi:10.3389/fpls.2016.00612)
Supplement: Table S9 — GO term analysis on PrSnRK2.7 overexpressor-specific downregulated genes by salt treatment. [file Table9.XLSX]

## Sheet: Table S９
Table S9. GO term analysis on PrSnRK2.7 overexpressor-specific downregulated genes by salt treatment
GO biological process	Fold Enrichment	p-value
histone phosphorylation	9.57447	0.0012
cellular response to iron ion starvation	8.85417	4.85e-08
stomatal complex morphogenesis	8.53659	4.34e-10
iron ion transport	8.4507	2.51e-08
glucose 6-phosphate metabolic process	8.11808	3.04e-10
pentose-phosphate shunt	8.11808	3.04e-10
NADP metabolic process	7.85714	5.72e-10
response to nitrate	7.58427	2.7e-12
isopentenyl diphosphate biosynthetic process, methylerythritol 4-phosphate pathway	7.53623	1.03e-11
mRNA modification	7.55814	6.49e-05
glyceraldehyde-3-phosphate metabolic process	7.50988	5.85e-18
nitrate transport	7.45856	4.21e-12
photosystem II assembly	7.43802	1.93e-07
stomatal complex development	7.33333	2.19e-09
isopentenyl diphosphate metabolic process	7.30337	2.14e-11
isopentenyl diphosphate biosynthetic process	7.30337	2.14e-11
chlorophyll biosynthetic process	6.39535	0.00361
leaf morphogenesis	6.38298	8.94e-08
photosynthesis, light reaction	6.2201	8.16e-10
cellular aldehyde metabolic process	6.12855	2.12e-16
inorganic anion transport	6.04752	1.97e-10
response to blue light	5.95238	0.019
transition metal ion transport	5.8548	8.27e-09
auxin biosynthetic process	5.80357	0.00122
indoleacetic acid biosynthetic process	5.81395	0.0237
indoleacetic acid metabolic process	5.71429	0.0265
shoot system morphogenesis	5.70292	3.64e-16
plastid membrane organization	5.53506	0.000312
thylakoid membrane organization	5.53506	0.000312
photosynthesis	5.44218	5.79e-11
cysteine biosynthetic process	5.39683	7.04e-05
cysteine metabolic process	5.2795	9.48e-05
serine family amino acid biosynthetic process	5.19878	0.000115
plant epidermis morphogenesis	5.16129	2.75e-07
porphyrin-containing compound biosynthetic process	5.11628	0.028
maltose metabolic process	5.06329	0.013
auxin metabolic process	5.05837	0.00555
indole-containing compound biosynthetic process	5.02283	0.0337
tetrapyrrole biosynthetic process	5.02283	0.0337
regulation of meristem growth	4.92	0.0073
histone H3-K9 modification	4.85	0.00372
histone H3-K9 methylation	4.85	0.00372
plastid organization	4.82	1.96e-07
pigment biosynthetic process	4.62	0.000268
rRNA processing	4.55	0.000342
chlorophyll metabolic process	4.51	0.0403
rRNA metabolic process	4.49	0.000402
serine family amino acid metabolic process	4.47	0.000436
response to cytokinin	4.4	0.000552
plant epidermis development	4.39	1.66e-12
cellular response to nutrient levels	4.24	5.13e-05
starch biosynthetic process	4.18	0.0403
response to nutrient levels	4.16	3.45e-05
cellular response to starvation	4.13	0.000159
post-embryonic morphogenesis	4.06	6.43e-09
isoprenoid biosynthetic process	4.05	1.12e-07
phospholipid biosynthetic process	4.04	1.92e-06
pyruvate metabolic process	4.04	7.65e-06
peptidyl-lysine methylation	4	0.00826
response to starvation	3.98	0.000298
regulation of meristem development	3.94	0.0379
isoprenoid metabolic process	3.93	2.37e-07
cellular response to extracellular stimulus	3.91	0.000105
pigment metabolic process	3.86	0.00178
response to extracellular stimulus	3.86	6.87e-05
cellular response to external stimulus	3.85	0.000137
trichoblast differentiation	3.82	0.000581
histone lysine methylation	3.79	0.0301
nicotinamide nucleotide metabolic process	3.74	0.000428
pyridine nucleotide metabolic process	3.71	0.000485
pyridine-containing compound metabolic process	3.67	0.000585
root epidermal cell differentiation	3.67	0.00109
root morphogenesis	3.64	5.76e-05
mitotic cell cycle process	3.64	0.00758
sulfur amino acid biosynthetic process	3.59	0.00909
oxidoreduction coenzyme metabolic process	3.56	0.000288
phospholipid metabolic process	3.55	3e-05
plant epidermal cell differentiation	3.53	0.00199
hormone biosynthetic process	3.48	0.0137
sulfur amino acid metabolic process	3.45	0.00873
leaf development	3.39	0.00211
ncRNA processing	3.35	0.0227
metal ion transport	3.34	2.16e-06
organ morphogenesis	3.33	3.71e-05
cellular amino acid biosynthetic process	3.32	0.000193
sulfur compound biosynthetic process	3.29	0.000398
cell division	3.2	0.00872
hormone metabolic process	3.19	0.0256
ribosome biogenesis	3.19	0.00917
histone modification	3.16	0.0178
alpha-amino acid biosynthetic process	3.14	0.00706
ncRNA metabolic process	3.13	0.00742
tissue development	3.12	1.78e-10
positive regulation of biosynthetic process	3.06	0.000367
cellular protein complex assembly	3.06	0.00412
alpha-amino acid metabolic process	2.97	0.000404
anion transport	2.93	8.57e-05
shoot system development	2.93	8.7e-10
regulation of hormone levels	2.92	0.00865
protein complex assembly	2.92	0.00234
protein complex biogenesis	2.9	0.00256
ribonucleoprotein complex biogenesis	2.9	0.0382
coenzyme metabolic process	2.87	0.002
anatomical structure morphogenesis	2.86	1.29e-13
positive regulation of cellular biosynthetic process	2.86	0.0299
positive regulation of metabolic process	2.85	6.81e-05
root development	2.85	0.00228
root system development	2.85	0.00228
positive regulation of nitrogen compound metabolic process	2.83	0.0355
phyllome development	2.82	2.46e-05
generation of precursor metabolites and energy	2.81	0.00686
sulfur compound metabolic process	2.77	0.0017
cellular amino acid metabolic process	2.76	0.000146
single-organism membrane organization	2.75	0.00682
response to nitrogen compound	2.71	0.000228
positive regulation of cellular metabolic process	2.69	0.0489
macromolecular complex assembly	2.64	0.00649
ribose phosphate metabolic process	2.64	0.0311
cofactor metabolic process	2.59	0.00441
protein complex subunit organization	2.58	0.00475
organ development	2.57	1.04e-09
organic acid biosynthetic process	2.55	1.73e-05
carboxylic acid biosynthetic process	2.55	1.73e-05
lipid biosynthetic process	2.49	7.15e-05
cellular component assembly	2.48	0.00126
positive regulation of biological process	2.48	5.59e-05
small molecule biosynthetic process	2.44	2.1e-06
cell differentiation	2.43	5.12e-05
cation transport	2.41	0.00249
organophosphate biosynthetic process	2.39	0.0078
positive regulation of cellular process	2.39	0.0206
polysaccharide metabolic process	2.38	0.0172
carbohydrate derivative metabolic process	2.35	2.08e-05
system development	2.31	3.44e-11
response to acid chemical	2.31	1.98e-05
cellular component biogenesis	2.29	1.9e-05
oxoacid metabolic process	2.27	2e-08
organic acid metabolic process	2.27	2.13e-08
monocarboxylic acid metabolic process	2.27	0.000156
organophosphate metabolic process	2.25	0.00089
macromolecular complex subunit organization	2.25	0.000376
cellular developmental process	2.23	0.000183
ion transport	2.21	0.000337
response to inorganic substance	2.18	0.00212
carboxylic acid metabolic process	2.16	2.97e-06
response to hormone	2.13	0.00016
small molecule metabolic process	2.13	9.83e-10
single-organism biosynthetic process	2.01	5.46e-09
response to oxygen-containing compound	2.01	2.49e-05
anatomical structure development	2	2.92e-09
multicellular organismal development	1.98	9.18e-09
single-multicellular organism process	1.97	8.18e-09
lipid metabolic process	1.95	0.00433
single-organism developmental process	1.94	2.19e-09
regulation of biological quality	1.94	0.0139
post-embryonic development	1.93	0.00125
developmental process	1.92	3.17e-09
response to endogenous stimulus	1.91	0.00421
phosphate-containing compound metabolic process	1.91	0.0002
phosphorus metabolic process	1.87	0.000345
organonitrogen compound biosynthetic process	1.85	0.0399
multicellular organismal process	1.84	5.19e-07
organelle organization	1.82	0.00895
response to chemical	1.81	1.45e-06
organonitrogen compound metabolic process	1.8	0.00298
response to organic substance	1.74	0.0027
response to external stimulus	1.72	0.0326
cellular component organization or biogenesis	1.66	5.22e-05
single-organism cellular process	1.65	1.14e-15
single-organism metabolic process	1.65	1.31e-09
cellular component organization	1.64	0.000622
response to stimulus	1.55	1.48e-06
biological regulation	1.5	2.72e-05
single-organism process	1.47	3.54e-12
regulation of biological process	1.47	0.00161
cellular process	1.36	2.76e-08
cellular metabolic process	1.3	0.00821
organic substance metabolic process	1.28	0.0153
metabolic process	1.28	0.00179
Unclassified	1.04	0
