# Supplementary material for: Heterologous Overexpression of Poplar SnRK2 Genes Enhanced Salt Stress Tolerance in Arabidopsis thaliana
Source: Front Plant Sci. 2016 May 9;7:612. doi: 10.3389/fpls.2016.00612 (PMC4860416; doi:10.3389/fpls.2016.00612)
Supplement: Table S10 — GO term analysis on commonly downregulated genes between the wild type and PtSnRK2.7 overexpressor by salt treatment. [file Table10.XLSX]

## Sheet: Table S1０
Table S10. GO term analysis on commonly downregulated genes between the wild type and PtSnRK2.7 overexpressor by salt treatment
GO biological process	Fold Enrichment	p-value
tissue development	5.43	0.025
anatomical structure morphogenesis	4.27	0.0352
organ development	4.26	0.0366
anatomical structure development	3.02	0.0469
single-organism developmental process	2.87	0.0495
