# Supplementary material for: Heterologous Overexpression of Poplar SnRK2 Genes Enhanced Salt Stress Tolerance in Arabidopsis thaliana
Source: Front Plant Sci. 2016 May 9;7:612. doi: 10.3389/fpls.2016.00612 (PMC4860416; doi:10.3389/fpls.2016.00612)
Supplement: Table S11 — Oligonucleotides used in this paper. [file Table11.XLSX]

## Sheet: Table S11
Table S11. Oligonucleotides used in this paper.
Primer name	Primer sequence (5'-3')	Experiments
Ubp10-forward	AACTTTGGTGGTTTGTGTTTTGG	RT-PCR
Ubp10-reverse	TCGACTTGTCATTAGAAAGAAAGAGATAA	RT-PCR
PtSnRK2.5-forward	ATGGATAGATCGGCGATGACAGTAGGACCGG	RT-PCR
PtSnRK2.5-reverse	TTACAATGCATAAACTATCTCCCCACTGCTG	RT-PCR
PtSnRK2.7-forward	ATGGATCGTTATGAGATTATGAAGAATATTG	RT-PCR
PtSnRK2.7-reverse	TCATAATGGGCACACGAAATCACCACTTGTC	RT-PCR
COR15A-F	CTTCTTCTTTCCACAGCGGAGCCA	qRT-PCR
COR15A-R	AGGATGTTGCCGTCACCTTTAGCG	qRT-PCR
AT1G52690-F	GCAGAAGCAGGTAAGGAGAAGAC	qRT-PCR
AT1G52690-R	TCAGTGCGAAGCCCTAAAGTGT	qRT-PCR
AT4G18280-F	CTTCTAATGCAGCCGCTACCC	qRT-PCR
AT4G18280-R	GCCAGACCCAAATCCAGTTCC	qRT-PCR
CWINV5(AtcwINV5)-F	GAAAGGAGGGTCGGTAATGGAGGT	qRT-PCR
CWINV5(AtcwINV5)-R	TAAACCTGATGACGCATTCCTCTG	qRT-PCR
AT4G33550-F	AACTTGTCGGGACTGATGAACG	qRT-PCR
AT4G33550-R	GTCAATGGGACGGATTAGAGCA	qRT-PCR
GASA3-F	ATCCTCTTCTGCCTCACCACTTT	qRT-PCR
GASA3-R	TCGACGATTTGCTGCATCTACCT	qRT-PCR
UBC9-F	TCACAATTTCCAAGGTGCTGC	qRT-PCR
UBC9-R	TCATCTGGGTTTGGATCCGT	qRT-PCR
